# Supplementary material for: Stereodivergent assembly of tetrahydro-γ-carbolines via synergistic catalytic asymmetric cascade reaction
Source: Nat Commun. 2019 Dec 5;10:5553. doi: 10.1038/s41467-019-13529-z (PMC6895234; doi:10.1038/s41467-019-13529-z)
Supplement: Supplementary file 1 — Supplementary Information [file 41467_2019_13529_MOESM1_ESM.pdf]

*Supplementary Information for*

**Stereodivergent assembly of tetrahydro- $\gamma$ -carbolines *via* synergistic  
catalytic asymmetric cascade reaction**

*Xu et al.*

## Supplementary Methods

**General information:** Unless otherwise stated, all reactions were set up under nitrogen atmosphere in oven-dried glassware using standard Schlenk techniques, monitored by TLC with silica-gel coated plates and purified by flash column chromatography. Commercially available reagents were used without further purification. Solvents were purified prior to use according to the standard methods. Aldimine esters<sup>1</sup>, 2-indolyl allyl carbonates<sup>2</sup>, chiral ligands **L1-L4**<sup>3</sup> and **L5-L7**<sup>4</sup> were prepared according to the literature procedure. <sup>1</sup>H NMR spectra were recorded on a Bruker 400 MHz spectrometer in CDCl<sub>3</sub>. Chemical shifts are reported in ppm with the internal TMS signal at 0.0 ppm as a standard. The data are reported as (s = single, d = double, t = triple, q = quarte, m = multiple or unresolved, brs = broad single, coupling constant(s) in Hz, integration). <sup>13</sup>C NMR spectra were recorded on a Bruker 100 MHz spectrometer in CDCl<sub>3</sub>. Chemical shifts are reported in ppm with the internal chloroform signal at 77.0 ppm as a standard. Enantiomeric excess values were determined by HPLC analysis employing AS-H, AD-H, IA, IC, ID, IE and OD-H chiral columns, using hexane and *i*-propanol as solvents. The racemic products were obtained by running reactions with racemic catalysts or blending equal amount of two enantiomers. The absolute configurations of compound **3a** and **3g** were determined unequivocally according to the X-ray diffraction analysis, and those of other tetrahydro- $\gamma$ -carbolines were deduced on the basis of these results.

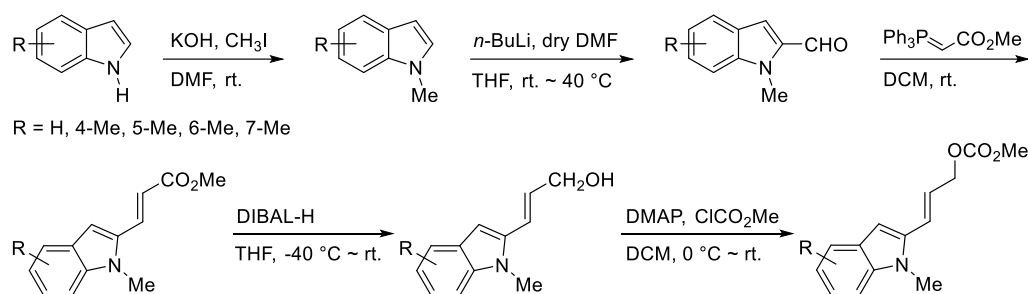

**Supplementary Figure 1.** Synthetic procedure **A** for substrate **2**. Pathway for the synthesis of allyl carbonates started from unsubstituted and methyl-substituted indoles (**2a-2e**).

**Step A1:** To a DMF (100 mL) solution of indole (50 mmol) was added KOH (100 mmol) at 25 °C. The reaction mixture was stirred at the same temperature for 30 min. Then CH<sub>3</sub>I (75 mmol) was added *via* syringe. The reaction mixture was stirred at 25 °C until complete consumption of starting material (detected by TLC). Then the reaction was quenched with water and extracted with EA (× 3). The organic layer was combined, washed with brine and dried over Na<sub>2</sub>SO<sub>4</sub>. After filtration and evaporation, the residue was purified by a flash column chromatography (PE/EA = 10/1) to provide 1-methyl-1*H*-indole (6.24 g, 95% yield) as a colorless oil.

**Step A2:** Under nitrogen atmosphere, to a solution of 1-methyl-1*H*-indole (6.24 g, 47.5 mmol) in anhydrous THF (50 mL) was added *n*-BuLi (2.4 M, 25 mL, 60 mmol) dropwise at 25 °C. The mixture was heated to 40 °C for 3 h and cooled to 25 °C, followed by the addition of anhydrous DMF (5.8 mL, 75 mmol) dropwise. The mixture was then stirred at 40 °C until complete consumption of starting material (detected by TLC). After quenching with a saturated solution of NH<sub>4</sub>Cl, the reaction mixture was extracted with EA (× 3). The organic layer was combined, washed with brine and dried over Na<sub>2</sub>SO<sub>4</sub>. After filtration and evaporation, the residue was purified by a flash column chromatography (PE/EA = 10/1, with 1% Et<sub>3</sub>N) to afford 1-methyl-1*H*-indole-2-carbaldehyde (5.92 g, 78% yield) as a yellow solid.

**Step A3:** To a solution of 1-methyl-1*H*-indole-2-carbaldehyde (5.92 g, 37.2 mmol) in CH<sub>2</sub>Cl<sub>2</sub> (80 mL) was added phosphorus ylide (13.36 g, 40 mmol) in one portion at 25 °C. The reaction was then stirred at 25 °C until complete consumption of starting material (detected by TLC). The mixture was concentrated under reduced pressure, and the residue was purified by a flash column chromatography (PE/EA = 5/1, with 1% Et<sub>3</sub>N) to provide methyl (*E*)-3-(1-methyl-1*H*-indol-2-yl)acrylate (7.95 g, 99%

yield) as a light yellow solid.

**Step A4:** Under nitrogen atmosphere, to a solution of methyl (*E*)-3-(1-methyl-1*H*-indol-2-yl)acrylate (4.3 g, 20 mmol) in anhydrous THF (40 mL) was added DIBAL-H (1.0 M, 50 mL, 50 mmol) dropwise at -40 °C. After stirring at -40 °C for 30 min, the reaction was then moved into 25 °C and continuously stirred until complete consumption of starting material (detected by TLC). The reaction mixture was quenched with 2.0 M NaOH (aq.), extracted with EA (× 3) and filtered through celite to remove the colloid. The organic layer was combined, washed with brine, dried over Na<sub>2</sub>SO<sub>4</sub> before evaporation. Then the residue was purified by a flash column chromatography (PE/EA = 3/1, with 1% Et<sub>3</sub>N) to afford (*E*)-3-(1-methyl-1*H*-indol-2-yl)prop-2-en-1-ol (3.65 g, 98% yield) as a yellow solid.

**Step A5:** DMAP (3.66 g, 30 mmol) and (*E*)-3-(1-methyl-1*H*-indol-2-yl)prop-2-en-1-ol (3.65 g, 19.5 mmol) were dissolved in CH<sub>2</sub>Cl<sub>2</sub> (40 mL) before cooled to 0 °C. Then methyl chlorocarbonate (1.93 mL, 25 mmol) was added dropwise *via* syringe at the same temperature. After stirring at 0 °C for 30 min, the reaction was then moved into 25 °C and continuously stirred until complete consumption of starting material (detected by TLC). Then the reaction mixture was quenched with a saturated solution of NaHCO<sub>3</sub> and extracted with CH<sub>2</sub>Cl<sub>2</sub> (× 3). The organic layer was combined, washed with brine and dried over Na<sub>2</sub>SO<sub>4</sub>. After filtration and evaporation, the residue was purified by a flash column chromatography (PE/EA = 10/1, with 1% Et<sub>3</sub>N to PE/EA = 5/1, with 1% Et<sub>3</sub>N) to provide (*E*)-methyl (3-(1-methyl-1*H*-indol-2-yl)allyl) carbonate **2a** (4.50 g, 94% yield) as a white solid.

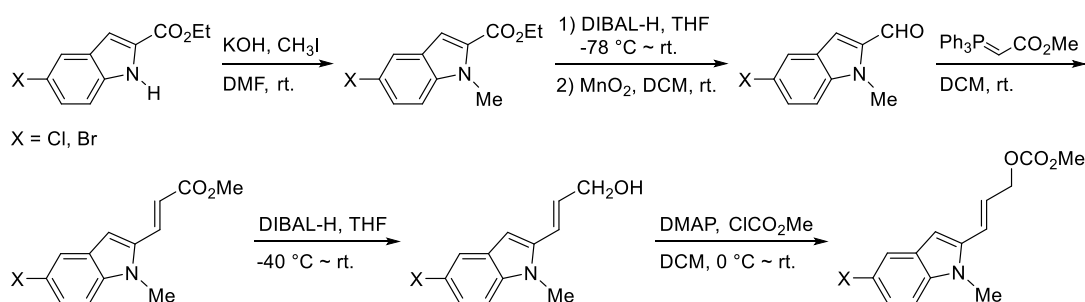

**Supplementary Figure 2.** Synthetic procedure **B** for substrate **2**. Pathway for the synthesis of allyl carbonates started from ethyl 5-chloro-2-indolecarboxylate and ethyl 5-bromo-2-indolecarboxylate (**2f** and **2g**).

**Step B1** (10 mmol starting material) followed the similar procedure as **Step A1** above to provide

ethyl 5-chloro-1-methyl-1*H*-indole-2-carboxylate (2.33 g, 98% yield) as a white solid.

**Step B2:** Under nitrogen atmosphere, to a solution of 5-chloro-1-methyl-1*H*-indole-2-carboxylate (2.33 g, 9.8 mmol) in anhydrous THF (20 mL) was added DIBAL-H (1.0 M, 25 mL, 25 mmol) dropwise at -78 °C. After stirring at -78 °C for 30 min, the reaction was then moved into 25 °C and continuously stirred until complete consumption of starting material (detected by TLC). The reaction mixture was quenched with 2.0 M NaOH (aq.), extracted with EA (× 3) and filtered through celite to remove the colloid. The organic layer was combined, washed with brine, dried over Na<sub>2</sub>SO<sub>4</sub> before evaporation. Then the crude material was dissolved in CH<sub>2</sub>Cl<sub>2</sub> (50 mL) along with fresh MnO<sub>2</sub> (100 mmol) and stirred vigorously until complete consumption of the crude material (detected by TLC). The reaction mixture was filtered, evaporated and purified by a flash column chromatography (PE/EA = 5/1, with 1% Et<sub>3</sub>N) to give 5-chloro-1-methyl-1*H*-indole-2-carbaldehyde (1.62 g, 84% yield) as a yellow solid.

**Step B3-B5** followed the similar procedures as **Step A3-A5** above to provide the final product (*E*)-3-(5-chloro-1-methyl-1*H*-indol-2-yl)allyl methyl carbonate **2f** (1.89 g, 81% yield over 3 steps) as a white solid.

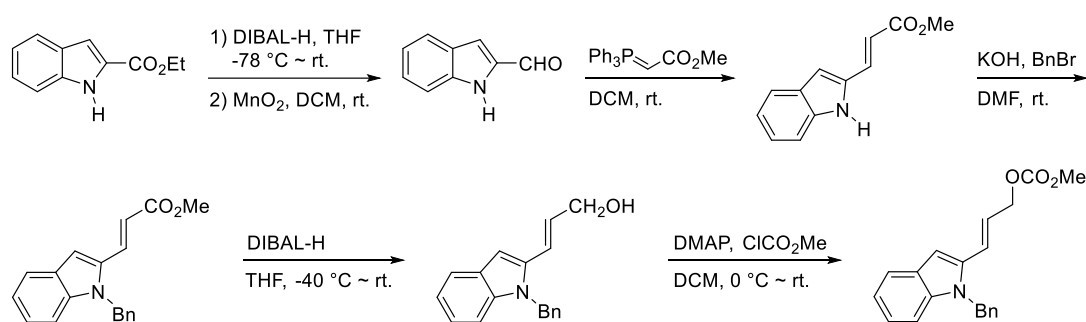

**Supplementary Figure 3.** Synthetic procedure **C** for substrate **2**. Pathway for the synthesis of *N*-substituted allyl carbonates started from unsubstituted ethyl indole-2-carboxylate (**2h**).

**Step C1-C2** (10 mmol starting material) followed the similar procedures as **Step B2-B3** above to provide methyl (*E*)-3-(1*H*-indol-2-yl)acrylate (1.59 g, 79% yield over 2 steps) as a white solid.

**Step C3** followed the similar procedure as **Step B1** above to provide *N*-protected product methyl (*E*)-3-(1-benzyl-1*H*-indol-2-yl)acrylate (2.19 g, 95% yield) as a white solid.

**Step C4-C5** followed the similar procedures as **Step B4-B5** above to provide the final product

(*E*)-3-(1-benzyl-1*H*-indol-2-yl)allyl methyl carbonate **2h** (2.13 g, 88% yield over 2 steps) as a white solid.

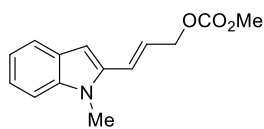

**(*E*)-methyl (3-(1-methyl-1*H*-indol-2-yl)allyl) carbonate (2a):** White solid; m.p. = 96 °C. <sup>1</sup>H NMR (400 MHz, CDCl<sub>3</sub>) δ 7.57 (d, *J* = 8.0 Hz, 1H), 7.28 (d, *J* = 8.0 Hz, 1H), 7.20 (t, *J* = 7.2 Hz, 1H), 7.09 (t, *J* = 7.2 Hz, 1H), 6.77 (d, *J* = 15.6 Hz, 1H), 6.69 (s, 1H), 6.35 (dt, *J* = 15.6, 6.4 Hz, 1H), 4.83 (d, *J* = 6.0 Hz, 2H), 3.82 (s, 3H), 3.74 (s, 3H); <sup>13</sup>C NMR (100 MHz, CDCl<sub>3</sub>) δ 155.55, 137.91, 136.56, 127.56, 124.49, 123.51, 121.94, 120.53, 119.82, 109.18, 99.86, 68.25, 54.83, 29.80.

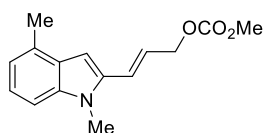

**(*E*)-3-(1,4-dimethyl-1*H*-indol-2-yl)allyl methyl carbonate (2b):** White solid; m.p. = 90 °C. <sup>1</sup>H NMR (400 MHz, CDCl<sub>3</sub>) δ 7.14-7.09 (m, 2H), 6.91-6.85 (m, 1H), 6.77 (d, *J* = 16.0 Hz, 1H), 6.71 (s, 1H), 6.37 (dt, *J* = 15.6, 6.4 Hz, 1H), 4.82 (dd, *J* = 6.4, 1.2 Hz, 2H), 3.81 (s, 3H), 3.72 (s, 3H), 2.52 (s, 3H); <sup>13</sup>C NMR (100 MHz, CDCl<sub>3</sub>) δ 155.61, 137.72, 135.99, 130.10, 127.52, 124.14, 123.73, 122.18, 119.99, 106.85, 98.53, 68.36, 54.86, 30.00, 18.59.

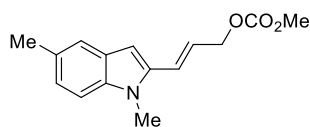

**(*E*)-3-(1,5-dimethyl-1*H*-indol-2-yl)allyl methyl carbonate (2c):** White solid; m.p. = 92 °C. <sup>1</sup>H NMR (400 MHz, CDCl<sub>3</sub>) δ 7.34 (s, 1H), 7.15 (d, *J* = 8.4 Hz, 1H), 7.01 (dd, *J* = 8.4, 1.6 Hz, 1H), 6.74 (d, *J* = 15.6 Hz, 1H), 6.59 (s, 1H), 6.32 (dt, *J* = 15.6, 6.4 Hz, 1H), 4.81 (dd, *J* = 6.4, 1.6 Hz, 2H), 3.81 (s, 3H), 3.69 (s, 3H), 2.42 (s, 3H); <sup>13</sup>C NMR (100 MHz, CDCl<sub>3</sub>) δ 155.59, 136.55, 136.45, 129.04, 127.81, 124.06, 123.75, 123.69, 120.12, 108.89, 99.37, 68.36, 54.85, 29.87, 21.34.

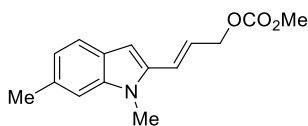

**(E)-3-(1,6-dimethyl-1H-indol-2-yl)allyl methyl carbonate (2d):** White solid; m.p. = 98 °C.  $^1\text{H}$  NMR (400 MHz,  $\text{CDCl}_3$ )  $\delta$  7.34 (s, 1H), 7.15 (d,  $J$  = 8.4 Hz, 1H), 7.01 (dd,  $J$  = 8.4, 1.6 Hz, 1H), 6.74 (d,  $J$  = 15.6 Hz, 1H), 6.59 (s, 1H), 6.32 (dt,  $J$  = 15.6, 6.4 Hz, 1H), 4.81 (dd,  $J$  = 6.4, 1.6 Hz, 2H), 3.81 (s, 3H), 3.69 (s, 3H), 2.42 (s, 3H);  $^{13}\text{C}$  NMR (100 MHz,  $\text{CDCl}_3$ )  $\delta$  155.59, 138.40, 136.01, 131.89, 125.43, 123.84, 123.72, 121.69, 120.20, 109.17, 99.85, 68.40, 54.83, 29.77, 21.95.

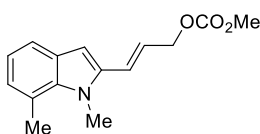

**(E)-3-(1,7-dimethyl-1H-indol-2-yl)allyl methyl carbonate (2e):** White solid; m.p. = 80 °C.  $^1\text{H}$  NMR (400 MHz,  $\text{CDCl}_3$ )  $\delta$  7.38 (d,  $J$  = 8.0 Hz, 1H), 6.93 (t,  $J$  = 7.2 Hz, 1H), 6.87 (d,  $J$  = 6.8 Hz, 1H), 6.73 (d,  $J$  = 15.6 Hz, 1H), 6.63 (s, 1H), 6.29 (dt,  $J$  = 15.6, 6.4 Hz, 1H), 4.81 (dd,  $J$  = 6.4, 1.2 Hz, 2H), 3.95 (s, 3H), 3.81 (s, 3H), 2.74 (s, 3H);  $^{13}\text{C}$  NMR (100 MHz,  $\text{CDCl}_3$ )  $\delta$  155.57, 137.37, 136.98, 128.42, 125.12, 124.83, 123.85, 120.95, 119.91, 118.76, 100.66, 68.27, 54.85, 32.91, 20.39.

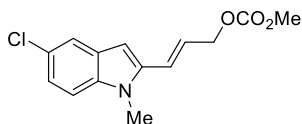

**(E)-3-(5-chloro-1-methyl-1H-indol-2-yl)allyl methyl carbonate (2f):** White solid; m.p. = 96 °C.  $^1\text{H}$  NMR (400 MHz,  $\text{CDCl}_3$ )  $\delta$  7.50 (d,  $J$  = 1.4 Hz, 1H), 7.14 (s, 1H), 7.12 (d,  $J$  = 1.9 Hz, 1H), 6.71 (d,  $J$  = 16.1 Hz, 1H), 6.58 (s, 1H), 6.34 (dt,  $J$  = 15.8, 6.3 Hz, 1H), 4.81 (dd,  $J$  = 6.3, 1.4 Hz, 2H), 3.81 (s, 3H), 3.67 (s, 3H);  $^{13}\text{C}$  NMR (100 MHz,  $\text{CDCl}_3$ )  $\delta$  155.52, 137.87, 136.26, 128.47, 125.57, 125.42, 122.87, 122.12, 119.71, 110.18, 99.22, 68.02, 54.89, 29.97.

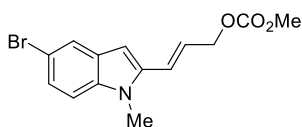

**(E)-3-(5-bromo-1-methyl-1H-indol-2-yl)allyl methyl carbonate (2g):** White solid; m.p. = 98 °C.  $^1\text{H}$  NMR (400 MHz,  $\text{CDCl}_3$ )  $\delta$  7.67 (d,  $J$  = 2.0 Hz, 1H), 7.28-7.23 (m, 1H), 7.12 (d,  $J$  = 8.8 Hz, 1H),

6.73 (d,  $J = 16.0$  Hz, 1H), 6.59 (s, 1H), 6.36 (dt,  $J = 15.6, 6.4$  Hz, 1H), 4.82 (dd,  $J = 6.4, 1.2$  Hz, 2H), 3.82 (s, 3H), 3.70 (s, 3H);  $^{13}\text{C}$  NMR (100 MHz,  $\text{CDCl}_3$ )  $\delta$  155.55, 137.76, 136.55, 129.19, 125.68, 124.70, 122.86, 113.07, 110.65, 99.17, 68.04, 54.92, 30.01.

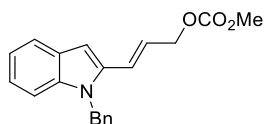

**(*E*)-3-(1-benzyl-1*H*-indol-2-yl)allyl methyl carbonate (2h):** White solid; m.p. = 88 °C.  $^1\text{H}$  NMR (400 MHz,  $\text{CDCl}_3$ )  $\delta$  7.60 (dd,  $J = 6.8, 1.2$  Hz, 1H), 7.28-7.20 (m, 4H), 7.16-7.12 (m, 1H), 7.12-7.07 (m, 1H), 7.03-6.96 (m, 2H), 6.77 (s, 1H), 6.70-6.62 (m, 1H), 6.34 (dt,  $J = 15.6, 6.4$  Hz, 1H), 5.36 (s, 2H), 4.73 (dd,  $J = 6.4, 1.2$  Hz, 2H), 3.77 (s, 3H);  $^{13}\text{C}$  NMR (100 MHz,  $\text{CDCl}_3$ )  $\delta$  155.49, 137.75, 137.49, 136.51, 128.76, 127.82, 127.37, 125.91, 124.96, 123.39, 122.28, 120.67, 120.17, 109.61, 100.50, 68.19, 54.82, 46.62.

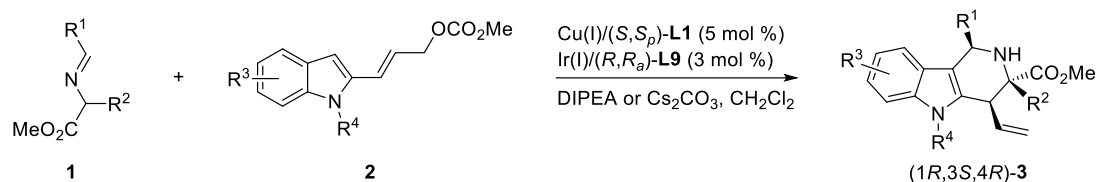

**Supplementary Figure 4.** Typical procedures for the synthesis of tetrahydro- $\gamma$ -carbolines **3**. Various substitutions are tolerated in this reaction; four stereoisomers are predictably prepared at will by using four available sets of catalyst permutations, respectively.

A flame dried Schlenk tube **A** was cooled to room temperature and filled with  $\text{N}_2$ . To this flask were added  $[\text{Ir}(\text{COD})\text{Cl}]_2$  (0.003 mmol, 1.5 mol %), (*R,R*<sub>a</sub>)-Me-THQphos-**L9** (0.006 mmol, 3.0 mol %), degassed THF (0.5 mL) and degassed *n*-propylamine (0.5 mL). The reaction mixture was heated at 50 °C for 30 min and then the volatile solvents were removed under vacuum to gain a pale yellow solid. Meanwhile,  $\text{Cu}(\text{MeCN})_4\text{BF}_4$  (0.01 mmol, 5 mol %) and (*S,S*<sub>p</sub>)-*i*-Pr-Phosferrox-**L1** (0.011 mmol, 5.5 mol %) were dissolved in 1.0 mL of  $\text{CH}_2\text{Cl}_2$  in a Schlenk tube **B**, and stirred at room temperature for about 30 min. Indole derived allylic carbonates (0.20 mmol), aldimine esters (0.30 mmol), base (0.40 mmol DIPEA for glycine derived aldimine esters and 0.40 mmol  $\text{Cs}_2\text{CO}_3$  for  $\alpha$ -substituted aldimine esters) and  $\text{CH}_2\text{Cl}_2$  (1.0 mL) were added into the Schlenk tube **A** and filled with  $\text{N}_2$ . The Cu/**L1** complex solution was then transferred from the Schlenk tube **B** to the Schlenk tube **A** *via* syringe. Finally, the reaction mixture was continuously stirred at room temperature under  $\text{N}_2$  atmosphere.

While the starting material was consumed (monitored by TLC), the reaction mixture was quenched by adding 1 M HCl aqueous solution (2.0 mL) and stirring vigorously for 1 min. The organic layers were separated, and the aqueous layer was extracted with  $\text{CH}_2\text{Cl}_2$  (5.0 mL  $\times$  2). The organic layer was combined, washed with saturated brine (10 mL) and dried over anhydrous  $\text{Na}_2\text{SO}_4$ . The organic solvent was removed by rotary evaporation to obtain a crude mixture, which was purified by flash column chromatography to give the pure product. The dr value was determined by  $^1\text{H}$  NMR spectrum of the product, and the enantiomeric excess was recorded by HPLC analysis in comparison with the racemic sample.

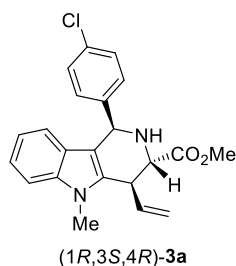

**Methyl (1R,3S,4R)-1-(4-chlorophenyl)-5-methyl-4-vinyl-2,3,4,5-tetrahydro-1H-pyrido[4,3-*b*]**

**indole-3-carboxylate (1R,3S,4R-**3a**):** Yield (98%); white solid; m.p. = 70 °C.  $[\alpha]_D^{20} = +52.4$  (*c* 0.5, CH<sub>2</sub>Cl<sub>2</sub>); <sup>1</sup>H NMR (400 MHz, CDCl<sub>3</sub>) δ 7.35 (d, *J* = 8.4 Hz, 2H), 7.29-7.23 (m, 3H), 7.15-7.11 (m, 1H), 6.91-6.85 (m, 1H), 6.82 (d, *J* = 8.0 Hz, 1H), 6.23 (ddd, *J* = 17.2, 10.0, 6.4 Hz, 1H), 5.40 (s, 1H), 5.31 (d, *J* = 10.0 Hz, 1H), 5.12 (d, *J* = 17.2 Hz, 1H), 4.21 (d, *J* = 6.4 Hz, 1H), 3.92 (d, *J* = 2.4 Hz, 1H), 3.71 (s, 3H), 3.66 (s, 3H). <sup>13</sup>C NMR (101 MHz, CDCl<sub>3</sub>) δ 172.75, 142.21, 138.67, 137.22, 133.46, 133.15, 130.00, 128.55, 124.96, 121.23, 119.07, 118.98, 117.75, 110.02, 108.78, 60.26, 54.15, 52.34, 38.90, 29.24. HRMS (ESI+) Calcd. For C<sub>22</sub>H<sub>22</sub>ClN<sub>2</sub>O<sub>2</sub> ([M+H]<sup>+</sup>): 381.1364, found: 381.1360. The product was analyzed by HPLC to determine the enantiomeric excess: 99% ee (Chiralpak AD-H, *i*-propanol/hexane = 2/98, flow rate 1.0 mL/min, λ = 282 nm); t<sub>r</sub> = 15.53 and 18.77 min.

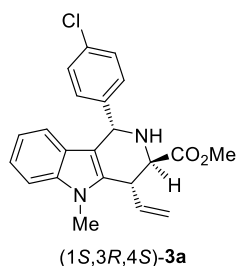

**Methyl (1S,3R,4S)-1-(4-chlorophenyl)-5-methyl-4-vinyl-2,3,4,5-tetrahydro-1H-pyrido[4,3-*b*]**

**indole-3-carboxylate (1S,3R,4S-**3a**):** Yield (95%); white solid.  $[\alpha]_D^{20} = -50.3$  (*c* 0.7, CH<sub>2</sub>Cl<sub>2</sub>). The product was analyzed by HPLC to determine the enantiomeric excess: 99% ee (Chiralpak AD-H, *i*-propanol/hexane = 2/98, flow rate 1.0 mL/min, λ = 282 nm); t<sub>r</sub> = 15.53 and 18.77 min.

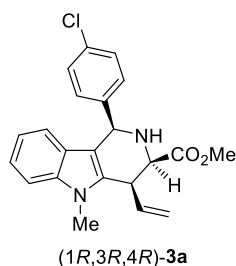

**Methyl (1*R*,3*R*,4*R*)-1-(4-chlorophenyl)-5-methyl-4-vinyl-2,3,4,5-tetrahydro-1*H*-pyrido[4,3-*b*]indole-3-carboxylate (1*R*,3*R*,4*R*-3a):** Yield (92%); white solid; m.p. = 86 °C.  $[\alpha]_D^{20} = +146.3$  (*c* 1.0, CH<sub>2</sub>Cl<sub>2</sub>); <sup>1</sup>H NMR (400 MHz, CDCl<sub>3</sub>) δ 7.36-7.32 (m, 2H), 7.31-7.25 (m, 2H), 7.17-7.10 (m, 1H), 6.91-6.84 (m, 1H), 6.73 (d, *J* = 8.0 Hz, 1H), 6.02 (ddd, *J* = 17.2, 10.0, 7.2 Hz, 1H), 5.32 (d, *J* = 10.4 Hz, 1H), 5.22 (s, 1H), 5.17-5.08 (m, 1H), 4.14 (d, *J* = 3.6 Hz, 1H), 3.99 (dd, *J* = 6.0, 4.0 Hz, 1H), 3.79 (s, 3H), 3.64 (s, 3H). <sup>13</sup>C NMR (101 MHz, CDCl<sub>3</sub>) δ 171.37, 141.19, 137.24, 135.12, 135.02, 133.42, 130.03, 128.64, 124.51, 121.33, 119.69, 119.24, 119.12, 111.06, 108.79, 60.83, 57.69, 52.12, 40.02, 28.98. HRMS (ESI+) Calcd. For C<sub>22</sub>H<sub>22</sub>ClN<sub>2</sub>O<sub>2</sub> ([M+H]<sup>+</sup>): 381.1364, found: 381.1369. The product was analyzed by HPLC to determine the enantiomeric excess: 99% ee (Chiralpak AD-H, *i*-propanol/hexane = 2/98, flow rate 1.0 mL/min, λ = 282 nm); t<sub>r</sub> = 25.07 and 28.05 min.

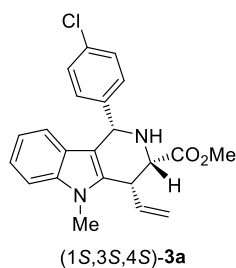

**Methyl (1*S*,3*S*,4*S*)-1-(4-chlorophenyl)-5-methyl-4-vinyl-2,3,4,5-tetrahydro-1*H*-pyrido[4,3-*b*]indole-3-carboxylate (1*S*,3*S*,4*S*-3a):** Yield (96%); white solid.  $[\alpha]_D^{20} = -156.0$  (*c* 0.8, CH<sub>2</sub>Cl<sub>2</sub>). The product was analyzed by HPLC to determine the enantiomeric excess: 99% ee (Chiralpak AD-H, *i*-propanol/hexane = 2/98, flow rate 1.0 mL/min, λ = 282 nm); t<sub>r</sub> = 25.07 and 28.05 min.

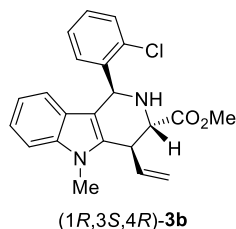

**Methyl (1*S*,3*S*,4*R*)-1-(2-chlorophenyl)-5-methyl-4-vinyl-2,3,4,5-tetrahydro-1*H*-pyrido[4,3-*b*]indole-3-carboxylate (1*R*,3*S*,4*R*-3b):** Yield (82%); white solid; m.p. = 64 °C.  $[\alpha]_D^{20} = +52.3$  (*c* 1.0, CH<sub>2</sub>Cl<sub>2</sub>); <sup>1</sup>H NMR (400 MHz, CDCl<sub>3</sub>) δ 7.46-7.41 (m, 1H), 7.29 (d, *J* = 8.4 Hz, 1H), 7.23-7.12 (m, 3H), 7.12-7.05 (m, 1H), 6.89 (t, *J* = 7.2 Hz, 1H), 6.82 (d, *J* = 7.6 Hz, 1H), 6.24 (ddd, *J* = 17.2, 10.0,

6.8 Hz, 1H), 5.96 (s, 1H), 5.30 (d,  $J = 10.4$  Hz, 1H), 5.13 (d,  $J = 16.8$  Hz, 1H), 4.24 (d,  $J = 6.4$  Hz, 1H), 3.95 (d,  $J = 1.6$  Hz, 1H), 3.74 (s, 3H), 3.68 (s, 3H).  $^{13}\text{C}$  NMR (101 MHz,  $\text{CDCl}_3$ )  $\delta$  172.77, 140.24, 138.63, 137.29, 134.10, 134.02, 130.37, 129.33, 128.72, 127.19, 124.89, 121.21, 119.30, 118.97, 117.72, 109.32, 108.77, 60.37, 52.35, 50.66, 38.75, 29.29. HRMS (ESI+) Calcd. For  $\text{C}_{22}\text{H}_{22}\text{ClN}_2\text{O}_2$  ( $[\text{M}+\text{H}]^+$ ): 381.1364, found: 381.1366. The product was analyzed by HPLC to determine the enantiomeric excess: 99% ee (Chiralpak AD-H, *i*-propanol/hexane = 2/98, flow rate 1.0 mL/min,  $\lambda = 234$  nm);  $t_r = 9.40$  and 10.13 min.

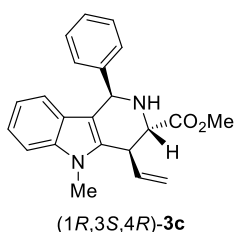

**Methyl (1R,3S,4R)-5-methyl-1-phenyl-4-vinyl-2,3,4,5-tetrahydro-1H-pyrido[4,3-*b*]**

**indole-3-carboxylate (1R,3S,4R-3c):** Yield (99%); white solid; m.p. = 54 °C.  $[\alpha]_D^{20} = -7.3$  ( $c$  1.4,  $\text{CH}_2\text{Cl}_2$ );  $^1\text{H}$  NMR (400 MHz,  $\text{CDCl}_3$ )  $\delta$  7.41 (dd,  $J = 8.0, 1.6$  Hz, 2H), 7.33-7.25 (m, 4H), 7.12 (ddd,  $J = 8.0, 6.4, 1.6$  Hz, 1H), 6.89-6.80 (m, 2H), 6.25 (ddd,  $J = 17.2, 10.0, 6.8$  Hz, 1H), 5.41 (s, 1H), 5.31 (d,  $J = 10.0$  Hz, 1H), 5.14 (d,  $J = 17.2$  Hz, 1H), 4.22 (d,  $J = 6.4$  Hz, 1H), 3.94 (d,  $J = 2.0$  Hz, 1H), 3.72 (s, 3H), 3.66 (s, 3H).  $^{13}\text{C}$  NMR (101 MHz,  $\text{CDCl}_3$ )  $\delta$  172.86, 143.54, 138.77, 137.22, 133.40, 128.59, 128.40, 127.56, 125.16, 121.08, 119.26, 118.84, 117.72, 110.54, 108.67, 60.36, 54.83, 52.31, 38.91, 29.23. HRMS (ESI+) Calcd. For  $\text{C}_{22}\text{H}_{23}\text{N}_2\text{O}_2$  ( $[\text{M}+\text{H}]^+$ ): 347.1754, found: 347.1754. The product was analyzed by HPLC to determine the enantiomeric excess: 99% ee (Chiralpak AD-H, *i*-propanol/hexane = 2/98, flow rate 1.0 mL/min,  $\lambda = 232$  nm);  $t_r = 13.33$  and 15.82 min.

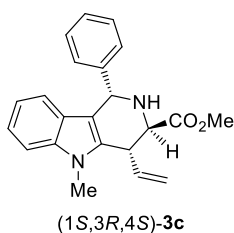

**Methyl (1S,3R,4S)-5-methyl-1-phenyl-4-vinyl-2,3,4,5-tetrahydro-1H-pyrido[4,3-*b*]**

**indole-3-carboxylate (1S,3R,4S-3c):** Yield (98%); white solid.  $[\alpha]_D^{20} = +6.9$  ( $c$  0.9,  $\text{CH}_2\text{Cl}_2$ ). The

product was analyzed by HPLC to determine the enantiomeric excess: 99% ee (Chiralpak AD-H, *i*-propanol/hexane = 2/98, flow rate 1.0 mL/min,  $\lambda$  = 232 nm);  $t_r$  = 13.33 and 15.82 min.

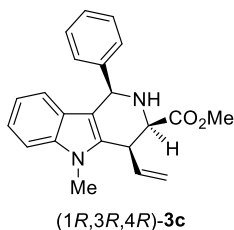

**Methyl (1R,3R,4R)-5-methyl-1-phenyl-4-vinyl-2,3,4,5-tetrahydro-1H-pyrido[4,3-*b*]**

**indole-3-carboxylate (1R,3R,4R-3c):** Yield (96%); white solid; m.p. = 62 °C.  $[\alpha]_D^{20}$  = +89.2 (*c* 0.2, CH<sub>2</sub>Cl<sub>2</sub>); <sup>1</sup>H NMR (400 MHz, CDCl<sub>3</sub>)  $\delta$  7.43-7.38 (m, 2H), 7.34-7.26 (m, 4H), 7.15-7.09 (m, 1H), 6.87-6.82 (m, 1H), 6.73 (d, *J* = 8.0 Hz, 1H), 6.03 (ddd, *J* = 17.2, 10.4, 7.2 Hz, 1H), 5.33 (d, *J* = 10.4 Hz, 1H), 5.25 (s, 1H), 5.13 (d, *J* = 17.2 Hz, 1H), 4.17 (d, *J* = 4.0 Hz, 1H), 4.02-3.98 (m, 1H), 3.78 (s, 3H), 3.64 (s, 3H). <sup>13</sup>C NMR (101 MHz, CDCl<sub>3</sub>)  $\delta$  171.48, 142.58, 137.22, 135.17, 134.89, 128.62, 128.47, 127.78, 124.70, 121.19, 119.69, 119.43, 118.98, 111.61, 108.68, 60.91, 58.37, 52.05, 39.99, 28.95. HRMS (ESI+) Calcd. For C<sub>22</sub>H<sub>23</sub>N<sub>2</sub>O<sub>2</sub> ([M+H]<sup>+</sup>): 347.1754, found: 347.1756. The product was analyzed by HPLC to determine the enantiomeric excess: 99% ee (Chiralpak AD-H, *i*-propanol/hexane = 2/98, flow rate 1.0 mL/min,  $\lambda$  = 232 nm);  $t_r$  = 29.80 and 34.58 min.

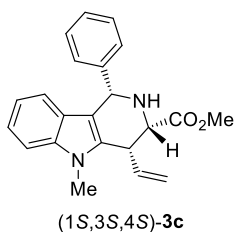

**Methyl (1S,3S,4S)-5-methyl-1-phenyl-4-vinyl-2,3,4,5-tetrahydro-1H-pyrido[4,3-*b*]**

**indole-3-carboxylate (1S,3S,4S-3c):** Yield (94%); white solid.  $[\alpha]_D^{20}$  = -88.9 (*c* 0.8, CH<sub>2</sub>Cl<sub>2</sub>). The product was analyzed by HPLC to determine the enantiomeric excess: 99% ee (Chiralpak AD-H, *i*-propanol/hexane = 2/98, flow rate 1.0 mL/min,  $\lambda$  = 232 nm);  $t_r$  = 29.80 and 34.58 min.

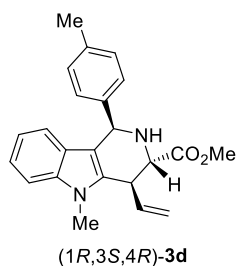

**Methyl (1R,3S,4R)-5-methyl-1-(*p*-tolyl)-4-vinyl-2,3,4,5-tetrahydro-1H-pyrido[4,3-*b*]**

**indole-3-carboxylate (1R,3S,4R-3d):** Yield (82%); white solid; m.p. = 54 °C.  $[\alpha]_D^{20} = +16.8$  (*c* 1.5, CH<sub>2</sub>Cl<sub>2</sub>); <sup>1</sup>H NMR (400 MHz, CDCl<sub>3</sub>) δ 7.30-7.25 (m, 3H), 7.14-7.08 (m, 3H), 6.89-6.83 (m, 2H), 6.24 (ddd, *J* = 16.8, 10.0, 6.8 Hz, 1H), 5.38 (s, 1H), 5.30 (d, *J* = 10.0 Hz, 1H), 5.13 (d, *J* = 17.2 Hz, 1H), 4.21 (d, *J* = 6.0 Hz, 1H), 3.93 (d, *J* = 2.0 Hz, 1H), 3.71 (s, 3H), 3.66 (s, 3H), 2.32 (s, 3H). <sup>13</sup>C NMR (101 MHz, CDCl<sub>3</sub>) δ 172.89, 140.48, 138.79, 137.21, 137.07, 133.43, 129.07, 128.43, 125.22, 121.04, 119.34, 118.79, 117.69, 110.67, 108.64, 60.36, 54.45, 52.29, 38.97, 29.23, 21.17. HRMS (ESI+) Calcd. For C<sub>23</sub>H<sub>25</sub>N<sub>2</sub>O<sub>2</sub> ([M+H]<sup>+</sup>): 361.1911, found: 361.1910. The product was analyzed by HPLC to determine the enantiomeric excess: 99% ee (Chiralpak AD-H plus AD-H, *i*-propanol/hexane = 2/98, flow rate 1.0 mL/min, λ = 238 nm); t<sub>r</sub> = 28.13 and 33.35 min.

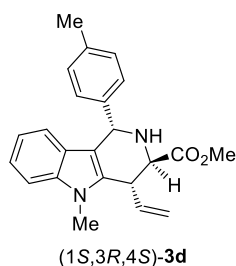

**Methyl (1S,3R,4S)-5-methyl-1-(*p*-tolyl)-4-vinyl-2,3,4,5-tetrahydro-1H-pyrido[4,3-*b*]**

**indole-3-carboxylate (1S,3R,4S-3d):** Yield (78%); white solid.  $[\alpha]_D^{20} = -17.4$  (*c* 1.2, CH<sub>2</sub>Cl<sub>2</sub>). The product was analyzed by HPLC to determine the enantiomeric excess: 99% ee (Chiralpak AD-H plus AD-H, *i*-propanol/hexane = 2/98, flow rate 1.0 mL/min, λ = 238 nm); t<sub>r</sub> = 28.13 and 33.35 min.

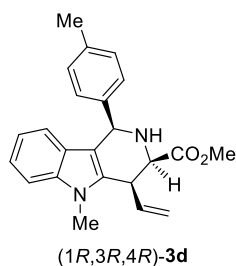

**Methyl (1R,3R,4R)-5-methyl-1-(*p*-tolyl)-4-vinyl-2,3,4,5-tetrahydro-1*H*-pyrido[4,3-*b*]**

**indole-3-carboxylate (1R,3R,4R-3d):** Yield (76%); white solid; m.p. = 50 °C.  $[\alpha]_D^{20} = +73.9$  (*c* 1.1, CH<sub>2</sub>Cl<sub>2</sub>); <sup>1</sup>H NMR (400 MHz, CDCl<sub>3</sub>) δ 7.30-7.26 (m, 3H), 7.14-7.09 (m, 3H), 6.86 (t, *J* = 7.6 Hz, 1H), 6.76 (d, *J* = 8.0 Hz, 1H), 6.01 (ddd, *J* = 16.8, 10.0, 7.2 Hz, 1H), 5.32 (d, *J* = 10.0 Hz, 1H), 5.22 (s, 1H), 5.12 (d, *J* = 16.8 Hz, 1H), 4.16 (d, *J* = 3.6 Hz, 1H), 4.02-3.96 (m, 1H), 3.78 (s, 3H), 3.63 (s, 3H), 2.34 (s, 3H). <sup>13</sup>C NMR (101 MHz, CDCl<sub>3</sub>) δ 171.52, 139.55, 137.33, 137.18, 135.14, 134.84, 129.14, 128.44, 124.74, 121.15, 119.68, 119.51, 118.92, 111.71, 108.64, 60.88, 57.93, 52.03, 39.94, 28.94, 21.18. HRMS (ESI+) Calcd. For C<sub>23</sub>H<sub>25</sub>N<sub>2</sub>O<sub>2</sub> ([M+H]<sup>+</sup>): 361.1911, found: 361.1912. The product was analyzed by HPLC to determine the enantiomeric excess: 99% ee (Chiralpak AD-H plus AD-H, *i*-propanol/hexane = 2/98, flow rate 1.0 mL/min, λ = 238 nm); t<sub>r</sub> = 48.58 and 46.05 min.

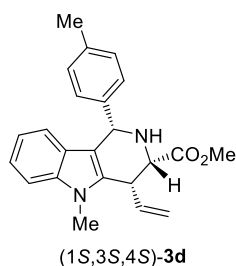

**Methyl (1S,3S,4S)-5-methyl-1-(*p*-tolyl)-4-vinyl-2,3,4,5-tetrahydro-1*H*-pyrido[4,3-*b*]**

**indole-3-carboxylate (1S,3S,4S-3d):** Yield (80%); white solid.  $[\alpha]_D^{20} = -72.8$  (*c* 0.9, CH<sub>2</sub>Cl<sub>2</sub>). The product was analyzed by HPLC to determine the enantiomeric excess: 99% ee (Chiralpak AD-H plus AD-H, *i*-propanol/hexane = 2/98, flow rate 1.0 mL/min, λ = 238 nm); t<sub>r</sub> = 48.58 and 46.05 min.

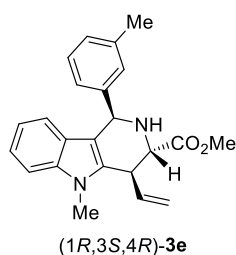

**Methyl (1*R*,3*S*,4*R*)-5-methyl-1-(*m*-tolyl)-4-vinyl-2,3,4,5-tetrahydro-1*H*-pyrido[4,3-*b*]**

**indole-3-carboxylate (1*R*,3*S*,4*R*-3e):** Yield (85%); white solid; m.p. = 58 °C.  $[\alpha]_D^{20} = +33.6$  (*c* 0.9, CH<sub>2</sub>Cl<sub>2</sub>); <sup>1</sup>H NMR (400 MHz, CDCl<sub>3</sub>) δ 7.27 (d, *J* = 8.4 Hz, 1H), 7.24-7.17 (m, 3H), 7.14-7.09 (m, 1H), 7.09-7.06 (m, 1H), 6.88-6.83 (m, 2H), 6.25 (ddd, *J* = 17.2, 10.0, 6.8 Hz, 1H), 5.37 (s, 1H), 5.32 (d, *J* = 10.0 Hz, 1H), 5.14 (d, *J* = 17.2 Hz, 1H), 4.22 (d, *J* = 6.4 Hz, 1H), 3.94 (d, *J* = 2.0 Hz, 1H), 3.72 (s, 3H), 3.66 (s, 3H), 2.30 (s, 3H). <sup>13</sup>C NMR (101 MHz, CDCl<sub>3</sub>) δ 172.84, 143.39, 138.80, 137.90, 137.20, 133.36, 129.28, 128.34, 128.23, 125.58, 125.22, 121.03, 119.35, 118.80, 117.71, 110.56, 108.62, 60.38, 54.83, 52.30, 38.90, 29.21, 21.45. HRMS (ESI+) Calcd. For C<sub>23</sub>H<sub>25</sub>N<sub>2</sub>O<sub>2</sub> ([M+H]<sup>+</sup>): 361.1911, found: 361.1912. The product was analyzed by HPLC to determine the enantiomeric excess: 99% ee (Chiralpak AD-H plus AD-H, *i*-propanol/hexane = 2/98, flow rate 1.0 mL/min, λ = 234 nm); t<sub>r</sub> = 21.94 and 23.41 min.

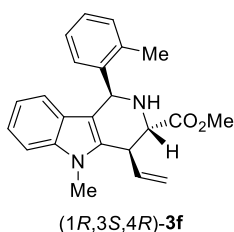

**Methyl (1*R*,3*S*,4*R*)-5-methyl-1-(*o*-tolyl)-4-vinyl-2,3,4,5-tetrahydro-1*H*-pyrido[4,3-*b*]**

**indole-3-carboxylate (1*R*,3*S*,4*R*-3f):** Yield (78%); white solid; m.p. = 52 °C.  $[\alpha]_D^{20} = +74.7$  (*c* 0.7, CH<sub>2</sub>Cl<sub>2</sub>); <sup>1</sup>H NMR (400 MHz, CDCl<sub>3</sub>) δ 7.28 (d, *J* = 8.0 Hz, 1H), 7.22 (d, *J* = 8.4 Hz, 1H), 7.18 (dd, *J* = 7.2, 1.2 Hz, 1H), 7.16-7.10 (m, 2H), 7.04 (t, *J* = 7.2 Hz, 1H), 6.88-6.82 (m, 1H), 6.71 (d, *J* = 7.6 Hz, 1H), 6.23 (ddd, *J* = 17.2, 10.0, 6.8 Hz, 1H), 5.65 (brs, 1H), 5.32-5.27 (m, 1H), 5.13 (d, *J* = 17.2 Hz, 1H), 4.22 (d, *J* = 6.4 Hz, 1H), 3.94 (d, *J* = 2.0 Hz, 1H), 3.73 (s, 3H), 3.67 (s, 3H), 2.60 (brs, 3H). <sup>13</sup>C NMR (101 MHz, CDCl<sub>3</sub>) δ 172.76, 140.53, 138.60, 137.19, 133.73, 130.32, 128.64, 127.33, 126.18, 125.02, 121.07, 119.35, 118.80, 117.80, 110.65, 108.65, 60.50, 52.28, 38.76, 29.25, 19.09. HRMS (ESI+) Calcd. For C<sub>23</sub>H<sub>25</sub>N<sub>2</sub>O<sub>2</sub> ([M+H]<sup>+</sup>): 361.1911, found: 361.1914. The product was analyzed by HPLC to determine the enantiomeric excess: 99% ee (Chiralpak AD-H plus AD-H, *i*-propanol/hexane = 2/98, flow rate 1.0 mL/min, λ = 234 nm); t<sub>r</sub> = 16.94 and 18.81 min.

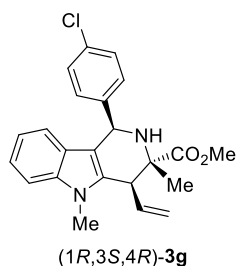

**Methyl (1R,3S,4R)-1-(4-chlorophenyl)-3,5-dimethyl-4-vinyl-2,3,4,5-tetrahydro-1H-pyrido**

**[4,3-*b*]indole-3-carboxylate (1R,3S,4R-**3g**):** Yield (80%); white solid; m.p. = 84 °C.  $[\alpha]_D^{20} = +125.7$  (*c* 1.0, CH<sub>2</sub>Cl<sub>2</sub>); <sup>1</sup>H NMR (400 MHz, CDCl<sub>3</sub>) δ 7.37-7.32 (m, 2H), 7.30-7.25 (m, 2H), 7.24 (t, *J* = 8.0 Hz, 1H), 7.10 (ddd, *J* = 8.0, 6.8, 1.2 Hz, 1H), 6.88-6.81 (m, 1H), 6.78 (d, *J* = 7.6 Hz, 1H), 6.07 (ddd, *J* = 17.2, 10.0, 8.8 Hz, 1H), 5.35 (s, 1H), 5.29 (m, 2H), 4.11 (d, *J* = 8.8 Hz, 1H), 3.66 (s, 3H), 3.65 (s, 3H), 1.38 (s, 3H). <sup>13</sup>C NMR (101 MHz, CDCl<sub>3</sub>) δ 176.12, 142.72, 137.47, 136.83, 135.71, 133.10, 130.02, 128.56, 124.85, 121.06, 119.03, 118.83, 118.34, 109.09, 108.77, 62.45, 55.24, 52.41, 43.40, 28.98, 25.27. HRMS (ESI+) Calcd. For C<sub>23</sub>H<sub>24</sub>ClN<sub>2</sub>O<sub>2</sub> ([M+H]<sup>+</sup>): 395.1521, found: 395.1524. The product was analyzed by HPLC to determine the enantiomeric excess: 99% ee (Chiralpak AS-H, *i*-propanol/hexane = 2/98, flow rate 0.5 mL/min, λ = 282 nm); t<sub>r</sub> = 11.25 and 13.41 min.

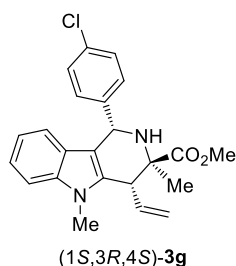

**Methyl (1S,3R,4S)-1-(4-chlorophenyl)-3,5-dimethyl-4-vinyl-2,3,4,5-tetrahydro-1H-pyrido**

**[4,3-*b*]indole-3-carboxylate (1S,3R,4S-**3g**):** Yield (77%); white solid.  $[\alpha]_D^{20} = -118.0$  (*c* 0.7, CH<sub>2</sub>Cl<sub>2</sub>). The product was analyzed by HPLC to determine the enantiomeric excess: 99% ee (Chiralpak AS-H, *i*-propanol/hexane = 2/98, flow rate 0.5 mL/min, λ = 282 nm); t<sub>r</sub> = 11.25 and 13.41 min.

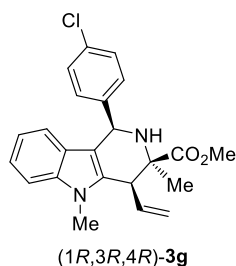

**Methyl (1*R*,3*R*,4*R*)-1-(4-chlorophenyl)-3,5-dimethyl-4-vinyl-2,3,4,5-tetrahydro-1*H*-pyrido**

**[4,3-*b*]indole-3-carboxylate (1*R*,3*R*,4*R*-**3g**):** Yield (76%); white solid; m.p. = 46 °C.  $[\alpha]_D^{20} = +252.2$  (*c* 0.9, CH<sub>2</sub>Cl<sub>2</sub>); <sup>1</sup>H NMR (400 MHz, CDCl<sub>3</sub>) δ 7.38-7.33 (m, 2H), 7.32-7.25 (m, 3H), 7.14 (ddd, *J* = 8.4, 7.2, 1.2 Hz, 1H), 6.93-6.85 (m, 1H), 6.78 (d, *J* = 8.0 Hz, 1H), 5.94 (ddd, *J* = 17.2, 10.0, 7.2 Hz, 1H), 5.28-5.22 (m, 1H), 5.17 (s, 1H), 5.11-5.03 (m, 1H), 3.75 (s, 3H), 3.72 (d, *J* = 6.8 Hz, 1H), 3.63 (s, 3H), 1.59 (s, 3H). <sup>13</sup>C NMR (101 MHz, CDCl<sub>3</sub>) δ 174.36, 141.15, 137.39, 136.47, 134.56, 133.35, 130.22, 128.68, 124.55, 121.16, 119.30, 119.06, 119.04, 108.81, 108.77, 63.13, 53.81, 52.18, 45.19, 28.95, 22.06. HRMS (ESI+) Calcd. For C<sub>23</sub>H<sub>24</sub>ClN<sub>2</sub>O<sub>2</sub> ([M+H]<sup>+</sup>): 395.1521, found: 395.1519. The product was analyzed by HPLC to determine the enantiomeric excess: 99% ee (Chiralpak AS-H, *i*-propanol/hexane = 2/98, flow rate 1.0 mL/min, λ = 282 nm); t<sub>r</sub> = 6.85 and 8.55 min.

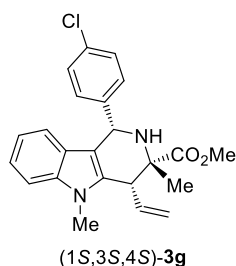

**Methyl (1*S*,3*S*,4*S*)-1-(4-chlorophenyl)-3,5-dimethyl-4-vinyl-2,3,4,5-tetrahydro-1*H*-pyrido**

**[4,3-*b*]indole-3-carboxylate (1*S*,3*S*,4*S*-**3g**):** Yield (75%); white solid.  $[\alpha]_D^{20} = -268.3$  (*c* 1.0, CH<sub>2</sub>Cl<sub>2</sub>). The product was analyzed by HPLC to determine the enantiomeric excess: 99% ee (Chiralpak AS-H, *i*-propanol/hexane = 2/98, flow rate 1.0 mL/min, λ = 282 nm); t<sub>r</sub> = 6.85 and 8.55 min.

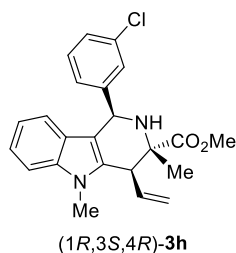

**Methyl (1*R*,3*S*,4*R*)-1-(3-chlorophenyl)-3,5-dimethyl-4-vinyl-2,3,4,5-tetrahydro-1*H*-pyrido**

**[4,3-*b*]indole-3-carboxylate (1*R*,3*S*,4*R*-**3h**):** Yield (86%); white solid; m.p. = 56 °C.  $[\alpha]^{20}_{\text{D}} = +124.5$  (*c* 1.0, CH<sub>2</sub>Cl<sub>2</sub>); <sup>1</sup>H NMR (400 MHz, CDCl<sub>3</sub>) δ 7.42 (s, 1H), 7.32-7.29 (m, 1H), 7.25-7.21 (m, 3H), 7.10 (ddd, *J* = 8.0, 6.8, 1.6 Hz, 1H), 6.88-6.83 (m, 1H), 6.83-6.79 (m, 1H), 6.08 (ddd, *J* = 17.2, 10.0, 8.8 Hz, 1H), 5.35 (s, 1H), 5.30 (m, 2H), 4.11 (d, *J* = 8.8 Hz, 1H) 3.66 (s, 3H), 3.64 (s, 3H), 1.38 (s, 3H). <sup>13</sup>C NMR (101 MHz, CDCl<sub>3</sub>) δ 176.06, 146.32, 137.41, 136.77, 135.64, 134.04, 129.63, 128.76, 127.69, 126.86, 124.80, 121.02, 118.95, 118.83, 118.36, 108.84, 108.75, 62.39, 55.55, 52.38, 43.37, 28.94, 25.23. HRMS (ESI+) Calcd. For C<sub>23</sub>H<sub>24</sub>ClN<sub>2</sub>O<sub>2</sub> ([M+H]<sup>+</sup>): 395.1521, found: 395.1518. The product was analyzed by HPLC to determine the enantiomeric excess: 99% ee (Chiralpak AS-H, *i*-propanol/hexane = 2/98, flow rate 0.5 mL/min, λ = 234 nm); t<sub>r</sub> = 10.67 and 12.02 min.

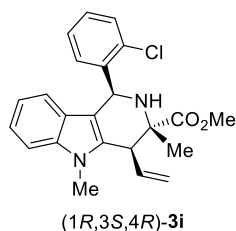

**Methyl (1*S*,3*S*,4*R*)-1-(2-chlorophenyl)-3,5-dimethyl-4-vinyl-2,3,4,5-tetrahydro-1*H*-pyrido**

**[4,3-*b*]indole-3-carboxylate (1*R*,3*S*,4*R*-**3i**):** Yield (82%); white solid; m.p. = 58 °C.  $[\alpha]^{20}_{\text{D}} = +170.0$  (*c* 1.0, CH<sub>2</sub>Cl<sub>2</sub>); <sup>1</sup>H NMR (400 MHz, CDCl<sub>3</sub>) δ 7.45-7.39 (m, 1H), 7.26 (d, *J* = 8.0 Hz, 1H), 7.21-7.15 (m, 2H), 7.14-7.07 (m, 2H), 6.90-6.83 (m, 1H), 6.78 (d, *J* = 8.0 Hz, 1H), 6.11-5.98 (m, 1H), 5.93 (s, 1H), 5.29 (s, 1H), 5.28-5.23 (m, 1H), 4.12 (d, *J* = 8.4 Hz, 1H), 3.68 (s, 3H), 3.67 (s, 3H), 1.39 (s, 3H). <sup>13</sup>C NMR (101 MHz, CDCl<sub>3</sub>) δ 176.16, 140.64, 137.44, 136.78, 136.39, 133.78, 130.55, 129.16, 128.57, 127.26, 124.79, 121.01, 119.26, 118.80, 118.20, 108.75, 108.27, 62.44, 52.34, 51.39, 43.34, 28.99, 25.12. HRMS (ESI+) Calcd. For C<sub>23</sub>H<sub>24</sub>ClN<sub>2</sub>O<sub>2</sub> ([M+H]<sup>+</sup>): 395.1521, found: 395.1522. The product was analyzed by HPLC to determine the enantiomeric excess: 99% ee (Chiralpak AS-H,

*i*-propanol/hexane = 2/98, flow rate 0.5 mL/min,  $\lambda$  = 234 nm);  $t_r$  = 9.51 and 10.65 min.

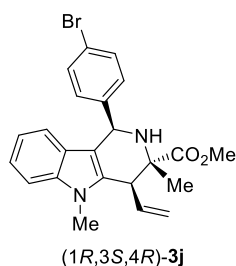

**Methyl (1R,3S,4R)-1-(4-bromophenyl)-3,5-dimethyl-4-vinyl-2,3,4,5-tetrahydro-1H-pyrido**

**[4,3-*b*]indole-3-carboxylate (1R,3S,4R-3j):** Yield (79%); white solid; m.p. = 60 °C.  $[\alpha]_D^{20} = +112.9$  (*c* 0.8, CH<sub>2</sub>Cl<sub>2</sub>); <sup>1</sup>H NMR (400 MHz, CDCl<sub>3</sub>)  $\delta$  7.45-7.40 (m, 2H), 7.31-7.27 (m, 2H), 7.24 (d, *J* = 8.4 Hz, 1H), 7.10 (ddd, *J* = 8.0, 7.2, 1.2 Hz, 1H), 6.87-6.82 (m, 1H), 6.78 (d, *J* = 8.0 Hz, 1H), 6.06 (ddd, *J* = 17.2, 10.0, 8.8 Hz, 1H), 5.34 (s, 1H), 5.32-5.24 (m, 2H), 4.11 (d, *J* = 8.8 Hz, 1H), 3.66 (s, 3H), 3.65 (s, 3H), 1.38 (s, 3H). <sup>13</sup>C NMR (101 MHz, CDCl<sub>3</sub>)  $\delta$  176.09, 143.21, 137.42, 136.78, 135.69, 131.49, 130.38, 124.80, 121.27, 121.05, 119.00, 118.82, 118.35, 108.96, 108.76, 62.41, 55.26, 52.41, 43.36, 28.96, 25.25. HRMS (ESI+) Calcd. For C<sub>23</sub>H<sub>24</sub>BrN<sub>2</sub>O<sub>2</sub> ([M+H]<sup>+</sup>): 439.1016, found: 439.1022. The product was analyzed by HPLC to determine the enantiomeric excess: 99% ee (Chiralpak AS-H, *i*-propanol/hexane = 2/98, flow rate 1.0 mL/min,  $\lambda$  = 234 nm);  $t_r$  = 5.44 and 6.73 min.

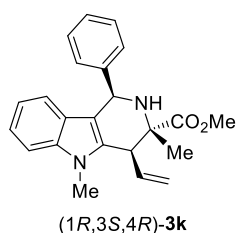

**Methyl (1R,3S,4R)-3,5-dimethyl-1-phenyl-4-vinyl-2,3,4,5-tetrahydro-1H-pyrido[4,3-*b*]**

**indole-3-carboxylate (1R,3S,4R-3k):** Yield (93%); white solid; m.p. = 54 °C.  $[\alpha]_D^{20} = +118.2$  (*c* 0.9, CH<sub>2</sub>Cl<sub>2</sub>); <sup>1</sup>H NMR (400 MHz, CDCl<sub>3</sub>)  $\delta$  7.41 (dd, *J* = 8.0, 1.6 Hz, 2H), 7.33-7.21 (m, 4H), 7.08 (ddd, *J* = 8.0, 6.4, 1.6 Hz, 1H), 6.85-6.80 (m, 1H), 6.79-6.77 (m, 1H), 6.10 (ddd, *J* = 17.2, 10.0, 8.8 Hz, 1H), 5.36 (s, 1H), 5.31-5.25 (m, 2H), 4.12 (d, *J* = 8.8 Hz, 1H), 3.66 (s, 3H), 3.66 (s, 3H), 1.38 (s, 3H). <sup>13</sup>C NMR (101 MHz, CDCl<sub>3</sub>)  $\delta$  176.23, 144.07, 137.44, 136.99, 135.63, 128.64, 128.39, 127.51,

125.04, 120.89, 119.19, 118.67, 118.19, 109.59, 108.65, 62.46, 55.91, 52.35, 43.42, 28.95, 25.31. HRMS (ESI+) Calcd. For C<sub>23</sub>H<sub>25</sub>N<sub>2</sub>O<sub>2</sub> ([M+H]<sup>+</sup>): 361.1911, found: 361.1914. The product was analyzed by HPLC to determine the enantiomeric excess: 99% ee (Chiralpak AS-H, *i*-propanol/hexane = 2/98, flow rate 0.5 mL/min,  $\lambda$  = 234 nm);  $t_r$  = 12.05 and 13.98 min.

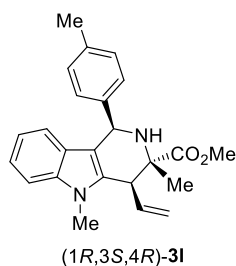

**Methyl (1*R*,3*S*,4*R*)-3,5-dimethyl-1-(*p*-tolyl)-4-vinyl-2,3,4,5-tetrahydro-1*H*-pyrido[4,3-*b*]**

**indole-3-carboxylate (1*R*,3*S*,4*R*-3l):** Yield (84%); white solid; m.p. = 50 °C.  $[\alpha]_D^{20}$  = +116.5 (*c* 1.1, CH<sub>2</sub>Cl<sub>2</sub>); <sup>1</sup>H NMR (400 MHz, CDCl<sub>3</sub>)  $\delta$  7.29 (d, *J* = 8.0 Hz, 2H), 7.22 (d, *J* = 8.4 Hz, 1H), 7.12-7.05 (m, 3H), 6.86-6.79 (m, 2H), 6.08 (ddd, *J* = 17.2, 10.0, 8.8 Hz, 1H), 5.33 (s, 1H), 5.30-5.23 (m, 2H), 4.11 (d, *J* = 8.8 Hz, 1H), 3.65 (s, 3H), 3.64 (s, 3H), 2.31 (s, 3H), 1.37 (s, 3H). <sup>13</sup>C NMR (101 MHz, CDCl<sub>3</sub>)  $\delta$  176.22, 141.02, 137.39, 136.99, 135.62, 129.05, 128.41, 125.05, 120.83, 119.23, 118.59, 118.10, 109.62, 108.60, 62.42, 55.45, 52.30, 43.40, 28.90, 25.27, 21.14. HRMS (ESI+) Calcd. For C<sub>24</sub>H<sub>27</sub>N<sub>2</sub>O<sub>2</sub> ([M+H]<sup>+</sup>): 375.2067, found: 375.2070. The product was analyzed by HPLC to determine the enantiomeric excess: 99% ee (Chiralpak AS-H, *i*-propanol/hexane = 2/98, flow rate 1.0 mL/min,  $\lambda$  = 254 nm);  $t_r$  = 4.51 and 5.38 min.

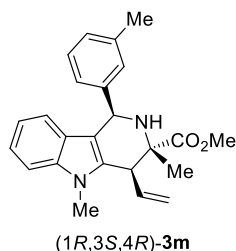

**Methyl (1*R*,3*S*,4*R*)-3,5-dimethyl-1-(*m*-tolyl)-4-vinyl-2,3,4,5-tetrahydro-1*H*-pyrido[4,3-*b*]**

**indole-3-carboxylate (1*R*,3*S*,4*R*-3m):** Yield (80%); white solid; m.p. = 62 °C.  $[\alpha]_D^{20}$  = +121.9 (*c* 1.1, CH<sub>2</sub>Cl<sub>2</sub>); <sup>1</sup>H NMR (400 MHz, CDCl<sub>3</sub>)  $\delta$  7.26-7.22 (m, 2H), 7.21-7.17 (m, 2H), 7.09 (ddd, *J* = 8.4, 6.0, 2.4 Hz, 2H), 6.86-6.78 (m, 2H), 6.10 (ddd, *J* = 17.2, 10.0, 8.8 Hz, 1H), 5.32-5.24 (m, 3H), 4.12

(d,  $J = 8.8$  Hz, 1H), 3.67 (s, 3H), 3.66 (s, 3H), 2.31 (s, 3H), 1.38 (s, 3H).  $^{13}\text{C}$  NMR (101 MHz,  $\text{CDCl}_3$ )  $\delta$  176.23, 143.90, 137.88, 137.41, 137.02, 135.63, 129.29, 128.31, 128.26, 125.65, 125.10, 120.84, 119.29, 118.64, 118.18, 109.59, 108.62, 62.48, 55.89, 52.35, 43.41, 28.95, 25.33, 21.47. HRMS (ESI+) Calcd. For  $\text{C}_{24}\text{H}_{27}\text{N}_2\text{O}_2$  ( $[\text{M}+\text{H}]^+$ ): 375.2067, found: 375.2071. The product was analyzed by HPLC to determine the enantiomeric excess: 99% ee (Chiralpak AS-H, *i*-propanol/hexane = 2/98, flow rate 0.5 mL/min,  $\lambda = 234$  nm);  $t_r = 9.55$  and 11.24 min.

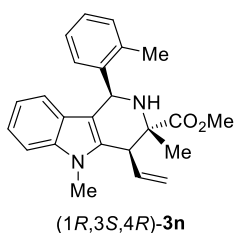

**Methyl (1R,3S,4R)-3,5-dimethyl-1-(*o*-tolyl)-4-vinyl-2,3,4,5-tetrahydro-1H-pyrido[4,3-*b*]**

**indole-3-carboxylate (1R,3S,4R-3n):** Yield (84%); white solid; m.p. = 54 °C.  $[\alpha]_D^{20} = +232.7$  (*c* 1.0,  $\text{CH}_2\text{Cl}_2$ );  $^1\text{H}$  NMR (400 MHz,  $\text{CDCl}_3$ )  $\delta$  7.25 (d,  $J = 8.4$  Hz, 2H), 7.16 (t,  $J = 6.8$  Hz, 2H), 7.12-7.04 (m, 2H), 6.82 (t,  $J = 7.6$  Hz, 1H), 6.67 (d,  $J = 7.6$  Hz, 1H), 6.07 (ddd,  $J = 17.2, 10.0, 8.8$  Hz, 1H), 5.64 (brs, 1H), 5.30-5.22 (m, 2H), 4.12 (d,  $J = 8.8$  Hz, 1H), 3.67 (s, 3H), 3.67 (s, 3H), 2.63 (brs, 3H), 1.37 (s, 3H).  $^{13}\text{C}$  NMR (101 MHz,  $\text{CDCl}_3$ )  $\delta$  176.23, 141.15, 137.39, 136.88, 135.98, 135.77, 130.14, 128.84, 127.22, 126.38, 124.89, 120.86, 119.23, 118.64, 118.15, 109.65, 108.64, 62.46, 52.30, 50.66, 43.29, 28.99, 25.35, 19.06. HRMS (ESI+) Calcd. For  $\text{C}_{24}\text{H}_{27}\text{N}_2\text{O}_2$  ( $[\text{M}+\text{H}]^+$ ): 375.2067, found: 375.2073. The product was analyzed by HPLC to determine the enantiomeric excess: 99% ee (Chiralpak IC plus IA, *i*-propanol/hexane = 1/99, flow rate 0.5 mL/min,  $\lambda = 234$  nm);  $t_r = 9.55$  and 11.24 min.

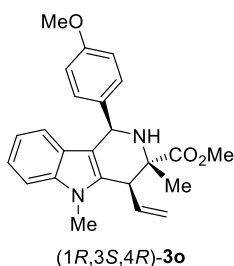

**Methyl (1R,3S,4R)-3,5-dimethyl-1-(4-methoxyphenyl)-4-vinyl-2,3,4,5-tetrahydro-1H-pyrido**

**[4,3-*b*]indole-3-carboxylate (1*R*,3*S*,4*R*-3o)**: Yield (88%); white solid; m.p. = 58 °C.  $[\alpha]_D^{20} = +91.8$  (*c* 0.9, CH<sub>2</sub>Cl<sub>2</sub>); <sup>1</sup>H NMR (400 MHz, CDCl<sub>3</sub>) δ 7.35-7.32 (m, 1H), 7.32-7.30 (m, 1H), 7.23 (d, *J* = 8.8 Hz, 1H), 7.09 (ddd, *J* = 8.4, 6.4, 2.0 Hz, 1H), 6.86-6.78 (m, 4H), 6.08 (ddd, *J* = 17.2, 10.0, 8.4 Hz, 1H), 5.32 (d, *J* = 0.8 Hz, 1H), 5.31-5.23 (m, 2H), 4.11 (d, *J* = 8.4 Hz, 1H), 3.77 (s, 3H), 3.65 (s, 3H), 3.65 (s, 3H), 1.37 (s, 3H). <sup>13</sup>C NMR (101 MHz, CDCl<sub>3</sub>) δ 176.23, 158.88, 137.40, 137.00, 136.26, 135.58, 129.60, 125.06, 120.85, 119.25, 118.61, 118.14, 113.71, 109.80, 108.62, 62.44, 55.16, 55.12, 52.32, 43.36, 28.93, 25.30. HRMS (ESI+) Calcd. For C<sub>24</sub>H<sub>27</sub>N<sub>2</sub>O<sub>3</sub> ([M+H]<sup>+</sup>): 391.2016, found: 391.2021. The product was analyzed by HPLC to determine the enantiomeric excess: 99% ee (Chiralpak AS-H, *i*-propanol/hexane = 2/98, flow rate 0.5 mL/min, λ = 234 nm); t<sub>r</sub> = 22.14 and 26.23 min.

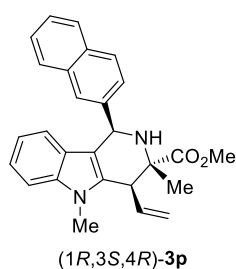

**Methyl (1*R*,3*S*,4*R*)-3,5-dimethyl-1-(naphthalen-2-yl)-4-vinyl-2,3,4,5-tetrahydro-1*H*-pyrido**

**[4,3-*b*]indole-3-carboxylate (1*R*,3*S*,4*R*-3p)**: Yield (75%); white solid; m.p. = 136 °C.  $[\alpha]_D^{20} = -10.2$  (*c* 1.0, CH<sub>2</sub>Cl<sub>2</sub>); <sup>1</sup>H NMR (400 MHz, CDCl<sub>3</sub>) δ 7.97 (s, 1H), 7.88-7.83 (m, 1H), 7.81-7.77 (m, 1H), 7.72 (d, *J* = 8.4 Hz, 1H), 7.50-7.41 (m, 3H), 7.23 (d, *J* = 8.4 Hz, 1H), 7.06 (ddd, *J* = 8.0, 6.4, 1.6 Hz, 1H), 6.79-6.70 (m, 2H), 6.16 (ddd, *J* = 16.4, 10.8, 8.8 Hz, 1H), 5.54 (s, 1H), 5.34 (s, 1H), 5.33-5.28 (m, 1H), 4.16 (d, *J* = 8.4 Hz, 1H), 3.68 (s, 6H), 1.40 (s, 3H). <sup>13</sup>C NMR (101 MHz, CDCl<sub>3</sub>) δ 176.27, 141.58, 137.44, 137.01, 135.71, 133.30, 133.15, 128.36, 127.86, 127.67, 127.28, 126.67, 125.77, 125.61, 125.05, 120.93, 119.15, 118.73, 118.22, 109.31, 108.65, 62.46, 56.08, 52.41, 43.51, 29.00, 25.34. HRMS (ESI+) Calcd. For C<sub>27</sub>H<sub>27</sub>N<sub>2</sub>O<sub>2</sub> ([M+H]<sup>+</sup>): 411.2067, found: 411.2071. The product was analyzed by HPLC to determine the enantiomeric excess: 99% ee (Chiralpak AS-H, *i*-propanol/hexane = 2/98, flow rate 1.0 mL/min, λ = 254 nm); t<sub>r</sub> = 5.54 and 6.78 min.

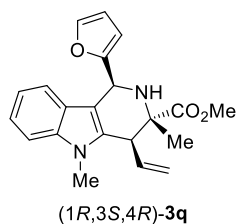

**Methyl (1R,3S,4R)-3,5-dimethyl-1-(furan-2-yl)-4-vinyl-2,3,4,5-tetrahydro-1H-pyrido[4,3-b]**

**indole-3-carboxylate (1R,3S,4R-3q):** Yield (83%); white solid; m.p. = 52 °C.  $[\alpha]_D^{20} = +258.9$  (*c* 1.0, CH<sub>2</sub>Cl<sub>2</sub>); <sup>1</sup>H NMR (400 MHz, CDCl<sub>3</sub>) δ 7.34 (dd, *J* = 1.6, 0.8 Hz, 1H), 7.25 (d, *J* = 8.4 Hz, 1H), 7.16-7.09 (m, 2H), 6.97-6.91 (m, 1H), 6.34-6.27 (m, 2H), 6.05 (ddd, *J* = 17.2, 10.0, 8.4 Hz, 1H), 5.58 (s, 1H), 5.29 (dd, *J* = 11.6, 0.8 Hz, 1H), 5.23 (d, *J* = 17.2 Hz, 1H), 4.10 (d, *J* = 8.4 Hz, 1H), 3.64 (s, 3H), 3.63 (s, 3H), 1.41 (s, 3H). <sup>13</sup>C NMR (101 MHz, CDCl<sub>3</sub>) δ 175.96, 156.06, 142.07, 137.33, 136.10, 135.63, 124.93, 121.09, 118.94, 118.88, 118.81, 109.95, 108.79, 107.19, 106.94, 62.33, 52.42, 48.84, 43.10, 28.91, 25.13. HRMS (ESI<sup>+</sup>) Calcd. For C<sub>21</sub>H<sub>23</sub>N<sub>2</sub>O<sub>3</sub> ([M+H]<sup>+</sup>): 351.1703, found: 351.1698. The product was analyzed by HPLC to determine the enantiomeric excess: 99% ee (Chiralpak AS-H, *i*-propanol/hexane = 2/98, flow rate 1.0 mL/min, λ = 234 nm); t<sub>r</sub> = 5.78 and 6.61 min.

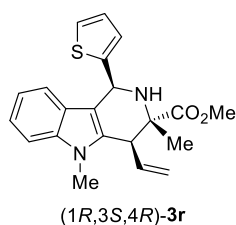

**Methyl (1R,3S,4R)-3,5-dimethyl-1-(thiophen-2-yl)-4-vinyl-2,3,4,5-tetrahydro-1H-pyrido[4,3-b]**

**indole-3-carboxylate (1R,3S,4R-3r):** Yield (84%); white solid; m.p. = 56 °C.  $[\alpha]_D^{20} = +209.8$  (*c* 1.0, CH<sub>2</sub>Cl<sub>2</sub>); <sup>1</sup>H NMR (400 MHz, CDCl<sub>3</sub>) δ 7.25-7.21 (m, 2H), 7.19 (d, *J* = 5.2 Hz, 1H), 7.14-7.09 (m, 1H), 7.05 (d, *J* = 8.0 Hz, 1H), 6.95 (dd, *J* = 5.2, 3.6 Hz, 1H), 6.90 (t, *J* = 7.2 Hz, 1H), 6.09 (ddd, *J* = 17.2, 10.0, 8.8 Hz, 1H), 5.77 (s, 1H), 5.30 (dd, *J* = 10.0, 1.2 Hz, 1H), 5.28-5.23 (m, 1H), 4.08 (d, *J* = 8.8 Hz, 1H), 3.64 (s, 3H), 3.63 (s, 3H), 1.39 (s, 3H). <sup>13</sup>C NMR (101 MHz, CDCl<sub>3</sub>) δ 176.10, 149.42, 137.39, 136.45, 135.16, 125.83, 125.25, 125.18, 125.07, 121.03, 118.92, 118.84, 118.50, 109.50, 108.76, 62.50, 52.40, 50.80, 43.42, 28.91, 25.11. HRMS (ESI<sup>+</sup>) Calcd. For C<sub>21</sub>H<sub>23</sub>N<sub>2</sub>O<sub>2</sub>S ([M+H]<sup>+</sup>): 367.1475, found: 367.1473. The product was analyzed by HPLC to determine the enantiomeric

excess: 99% ee (Chiralpak AS-H, *i*-propanol/hexane = 2/98, flow rate 1.0 mL/min,  $\lambda$  = 234 nm);  $t_r$  = 5.86 and 6.84 min.

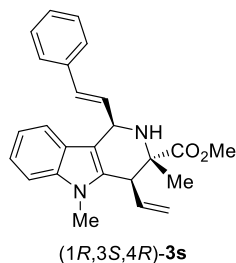

**Methyl (1*R*,3*S*,4*R*)-3,5-dimethyl-1-((*E*)-styryl)-4-vinyl-2,3,4,5-tetrahydro-1*H*-pyrido[4,3-*b*]**

**indole-3-carboxylate (1*R*,3*S*,4*R*-**3s**):** Yield (89%); white solid; m.p. = 62 °C.  $[\alpha]_D^{20}$  = +219.8 (*c* 1.0, CH<sub>2</sub>Cl<sub>2</sub>); <sup>1</sup>H NMR (400 MHz, CDCl<sub>3</sub>)  $\delta$  7.48 (d, *J* = 8.0 Hz, 1H), 7.42 (d, *J* = 7.2 Hz, 2H), 7.31-7.18 (m, 4H), 7.17-7.12 (m, 1H), 6.99-6.94 (m, 1H), 6.87 (d, *J* = 15.6 Hz, 1H), 6.25 (dd, *J* = 15.6, 8.4 Hz, 1H), 6.00 (ddd, *J* = 17.2, 10.0, 8.4 Hz, 1H), 5.28 (dd, *J* = 10.0, 1.6 Hz, 1H), 5.19 (d, *J* = 17.2 Hz, 1H), 5.01 (d, *J* = 8.4 Hz, 1H), 4.07 (d, *J* = 8.8 Hz, 1H), 3.63 (s, 3H), 3.62 (s, 3H), 1.40 (s, 3H). <sup>13</sup>C NMR (101 MHz, CDCl<sub>3</sub>)  $\delta$  176.22, 137.40, 136.93, 136.42, 134.97, 132.95, 131.47, 128.41, 127.38, 126.53, 125.28, 121.01, 119.18, 118.83, 118.45, 108.75, 108.21, 61.93, 54.08, 52.33, 43.19, 28.92, 25.16. HRMS (ESI+) Calcd. For C<sub>25</sub>H<sub>27</sub>ClN<sub>2</sub>O<sub>2</sub> ([M+H]<sup>+</sup>): 387.2067, found: 387.2072. The product was analyzed by HPLC to determine the enantiomeric excess: 99% ee (Chiralpak AS-H, *i*-propanol/hexane = 2/98, flow rate 1.0 mL/min,  $\lambda$  = 254 nm);  $t_r$  = 5.08 and 5.98 min.

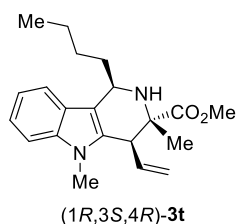

**Methyl (1*R*,3*S*,4*R*)-1-butyl-3,5-dimethyl-4-vinyl-2,3,4,5-tetrahydro-1*H*-pyrido[4,3-*b*]**

**indole-3-carboxylate (1*R*,3*S*,4*R*-**3t**):** Yield (83%); yellow oil;  $[\alpha]_D^{20}$  = +387.818 (*c* 1.1, CH<sub>2</sub>Cl<sub>2</sub>); <sup>1</sup>H NMR (400 MHz, CDCl<sub>3</sub>)  $\delta$  7.51 (d, *J* = 7.6 Hz, 1H), 7.26 (d, *J* = 8.0 Hz, 1H), 7.19-7.13 (m, 1H), 7.08-7.01 (m, 1H), 5.95 (ddd, *J* = 17.2, 10.0, 8.8 Hz, 1H), 5.23 (dd, *J* = 10.0, 1.6 Hz, 1H), 5.15 (d, *J* = 17.2 Hz, 1H), 4.42 (dd, *J* = 8.0, 1.6 Hz, 1H), 4.01 (d, *J* = 8.4 Hz, 1H), 3.60 (s, 3H), 3.55 (s, 3H),

2.12-2.03 (m, 1H), 1.82-1.71 (m, 1H), 1.50-1.38 (m, 2H), 1.37 (s, 3H), 1.34-1.25 (m, 2H), 0.90 (t,  $J = 7.2$  Hz, 3H).  $^{13}\text{C}$  NMR (101 MHz,  $\text{CDCl}_3$ )  $\delta$  176.43, 137.46, 136.77, 135.28, 125.01, 120.72, 119.03, 118.53, 118.14, 110.24, 108.84, 61.96, 52.15, 50.26, 43.51, 36.34, 28.81, 27.24, 25.26, 22.98, 14.11. HRMS (ESI+) Calcd. For  $\text{C}_{21}\text{H}_{29}\text{N}_2\text{O}_2$  ( $[\text{M}+\text{H}]^+$ ): 341.2224, found: 341.2223. The product was analyzed by HPLC to determine the enantiomeric excess: 99% ee (Chiralpak ID, *i*-propanol/hexane = 2/98, flow rate 0.5 mL/min,  $\lambda = 254$  nm);  $t_r = 9.14$  and 9.70 min.

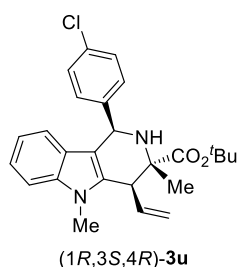

***tert*-butyl (1*R*,3*S*,4*R*)-1-(4-chlorophenyl)-3,5-dimethyl-4-vinyl-2,3,4,5-tetrahydro-1*H*-pyrido**

**[4,3-*b*]indole-3-carboxylate (1*R*,3*S*,4*R*)-**3u****: Yield (87%); white solid; m.p. = 48 °C.  $[\alpha]_D^{20} = +97.2$  ( $c$  1.0,  $\text{CH}_2\text{Cl}_2$ );  $^1\text{H}$  NMR (400 MHz,  $\text{CDCl}_3$ )  $\delta$  7.36-7.31 (m, 2H), 7.29-7.25 (m, 2H), 7.23 (d,  $J = 8.4$  Hz, 1H), 7.09 (ddd,  $J = 8.0, 6.8, 1.2$  Hz, 1H), 6.87-6.80 (m, 1H), 6.78 (d,  $J = 7.6$  Hz, 1H), 6.07 (ddd,  $J = 17.2, 10.0, 8.4$  Hz, 1H), 5.35 (s, 1H), 5.30-5.21 (m, 2H), 4.03 (d,  $J = 8.4$  Hz, 1H), 3.66 (s, 3H), 1.35 (s, 3H), 1.30 (s, 9H).  $^{13}\text{C}$  NMR (101 MHz,  $\text{CDCl}_3$ )  $\delta$  174.65, 142.89, 137.36, 137.23, 136.24, 132.98, 129.95, 128.52, 124.89, 120.86, 118.88, 118.71, 117.93, 108.83, 108.61, 81.22, 62.67, 55.31, 43.45, 28.82, 27.89, 24.76. HRMS (ESI+) Calcd. For  $\text{C}_{26}\text{H}_{30}\text{ClN}_2\text{O}_2$  ( $[\text{M}+\text{H}]^+$ ): 437.1990, found: 437.1997. The product was analyzed by HPLC to determine the enantiomeric excess: 99% ee (Chiralpak OD-H, *i*-propanol/hexane = 2/98, flow rate 0.5 mL/min,  $\lambda = 238$  nm);  $t_r = 9.26$  and 10.47 min.

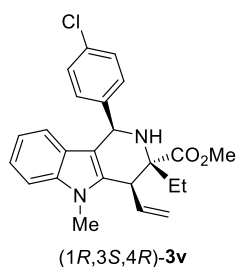

**Methyl (1*R*,3*S*,4*R*)-1-(4-chlorophenyl)-3-ethyl-5-methyl-4-vinyl-2,3,4,5-tetrahydro-1*H*-pyrido**

**[4,3-*b*]indole-3-carboxylate (1*R*,3*S*,4*R*-**3v**):** Yield (85%); white solid; m.p. = 78 °C.  $[\alpha]^{20}_{\text{D}} = +96.9$  (*c* 1.3, CH<sub>2</sub>Cl<sub>2</sub>); <sup>1</sup>H NMR (400 MHz, CDCl<sub>3</sub>) δ 7.35 (d, *J* = 8.4 Hz, 2H), 7.26 (d, *J* = 8.4 Hz, 2H), 7.23 (d, *J* = 8.4 Hz, 1H), 7.12-7.05 (m, 1H), 6.84 (t, *J* = 7.2 Hz, 1H), 6.77 (d, *J* = 7.6 Hz, 1H), 6.06 (ddd, *J* = 17.2, 10.0, 9.2 Hz, 1H), 5.35-5.21 (m, 3H), 4.15 (d, *J* = 8.8 Hz, 1H), 3.67 (s, 3H), 3.63 (s, 3H), 1.83 (dq, *J* = 14.8, 7.6 Hz, 1H), 1.64 (dq, *J* = 14.8, 7.6 Hz, 1H), 0.91 (t, *J* = 7.6 Hz, 3H). <sup>13</sup>C NMR (101 MHz, CDCl<sub>3</sub>) δ 174.84, 142.79, 137.46, 136.72, 135.74, 133.05, 130.03, 128.51, 124.83, 120.97, 118.93, 118.78, 117.82, 109.26, 108.75, 66.37, 55.29, 52.04, 41.77, 30.69, 28.96, 7.72. HRMS (ESI+) Calcd. For C<sub>24</sub>H<sub>26</sub>ClN<sub>2</sub>O<sub>2</sub> ([M+H]<sup>+</sup>): 409.1677, found: 409.1682. The product was analyzed by HPLC to determine the enantiomeric excess: 99% ee (Chiralpak AS-H, *i*-propanol/hexane = 2/98, flow rate 1.0 mL/min, λ = 236 nm); t<sub>r</sub> = 4.75 and 5.49 min.

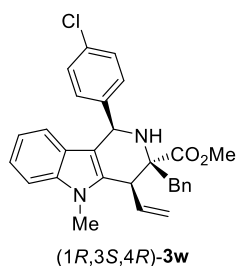

**Methyl (1*R*,3*S*,4*R*)-3-benzyl-1-(4-chlorophenyl)-5-methyl-4-vinyl-2,3,4,5-tetrahydro-1*H*-pyrido [4,3-*b*]indole-3-carboxylate (1*R*,3*S*,4*R*-**3w**):** Yield (86%); white solid; m.p. = 74 °C.  $[\alpha]^{20}_{\text{D}} = +11.2$  (*c* 1.1, CH<sub>2</sub>Cl<sub>2</sub>); <sup>1</sup>H NMR (400 MHz, CDCl<sub>3</sub>) δ 7.35 (d, *J* = 8.4 Hz, 2H), 7.29-7.20 (m, 6H), 7.11-7.05 (m, 3H), 6.87-6.77 (m, 2H), 6.23 (dt, *J* = 17.2, 9.6 Hz, 1H), 5.41 (d, *J* = 9.2 Hz, 1H), 5.37 (s, 1H), 5.31 (s, 1H), 4.22 (d, *J* = 9.2 Hz, 1H), 3.65 (s, 3H), 3.43 (s, 3H), 3.08 (d, *J* = 13.2 Hz, 1H), 2.94 (d, *J* = 13.2 Hz, 1H). <sup>13</sup>C NMR (101 MHz, CDCl<sub>3</sub>) δ 174.32, 143.15, 137.49, 137.16, 135.58, 135.10, 132.92, 130.13, 129.68, 128.44, 128.39, 127.17, 124.83, 121.10, 118.97, 118.81, 118.40, 109.50, 108.76, 66.95, 55.16, 51.71, 44.51, 43.96, 28.98. HRMS (ESI+) Calcd. For C<sub>29</sub>H<sub>28</sub>ClN<sub>2</sub>O<sub>2</sub> ([M+H]<sup>+</sup>): 471.1834, found: 471.1830. The product was analyzed by HPLC to determine the enantiomeric excess: 99% ee (Chiralpak IE, *i*-propanol/hexane = 2/98, flow rate 1.0 mL/min, λ = 236 nm); t<sub>r</sub> = 7.40 and 8.79 min.

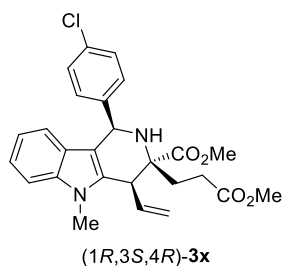

**Methyl (1*R*,3*S*,4*R*)-1-(4-chlorophenyl)-3-(3-methoxy-3-oxopropyl)-5-methyl-4-vinyl-2,3,4,5-tetrahydro-1*H*-pyrido[4,3-*b*]indole-3-carboxylate (1*R*,3*S*,4*R*-**3x**):** Yield (82%); white solid; m.p. = 76 °C.  $[\alpha]^{20}_{\text{D}} = +100.2$  (*c* 0.9, CH<sub>2</sub>Cl<sub>2</sub>); <sup>1</sup>H NMR (400 MHz, CDCl<sub>3</sub>) δ 7.37-7.32 (m, 2H), 7.30-7.25 (m, 2H), 7.38 (d, *J* = 8.4 Hz, 1H), 7.13-7.07 (m, 1H), 6.88-6.81 (m, 1H), 6.78 (d, *J* = 8.0 Hz, 1H), 6.07 (ddd, *J* = 17.2, 10.0, 9.2 Hz, 1H), 5.33 (m, 3H), 4.13 (d, *J* = 8.8 Hz, 1H), 3.66 (s, 3H), 3.66 (s, 3H), 3.63 (s, 3H), 2.50-2.40 (m, 1H), 2.39-2.30 (m, 1H), 2.16-2.08 (m, 1H), 2.03-1.94 (m, 1H). <sup>13</sup>C NMR (101 MHz, CDCl<sub>3</sub>) δ 174.30, 172.91, 142.49, 137.49, 136.36, 135.14, 133.16, 130.01, 128.55, 124.74, 121.16, 119.01, 118.88, 118.43, 109.25, 108.79, 65.03, 55.16, 52.36, 51.78, 42.25, 32.34, 28.98, 28.14. HRMS (ESI+) Calcd. For C<sub>26</sub>H<sub>28</sub>ClN<sub>2</sub>O<sub>4</sub> ([M+H]<sup>+</sup>): 467.1732, found: 467.1734. The product was analyzed by HPLC to determine the enantiomeric excess: 99% ee (Chiralpak IE, *i*-propanol/hexane = 5/95, flow rate 1.0 mL/min, λ = 236 nm); t<sub>r</sub> = 13.91 and 16.61 min.

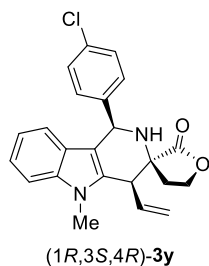

**(1*R*,3*S*,4*R*)-1'-(4-chlorophenyl)-5'-Methyl-4'-vinyl-1',2',4,4',5,5'-hexahydro-2*H*-spiro [furan-3,3'-pyrido[4,3-*b*]indol]-2-one (1*R*,3*S*,4*R*-**3y**):** Yield (81%); white solid; m.p. = 60 °C.  $[\alpha]^{20}_{\text{D}} = +58.3$  (*c* 1.2, CH<sub>2</sub>Cl<sub>2</sub>); <sup>1</sup>H NMR (400 MHz, CDCl<sub>3</sub>) δ 7.37-7.31 (m, 2H), 7.31-7.27 (m, 2H), 7.26 (d, *J* = 8.4 Hz, 1H), 7.14-7.07 (m, 1H), 6.89-6.81 (m, 1H), 6.69 (d, *J* = 8.0 Hz, 1H), 6.03 (ddd, *J* = 17.6, 10.0, 8.0 Hz, 1H), 5.35 (dd, *J* = 10.0, 0.8 Hz, 1H), 5.25 (s, 1H), 5.19 (d, *J* = 13.2 Hz, 1H), 4.40 (td, *J* = 9.6, 6.0 Hz, 1H), 4.29 (td, *J* = 8.4, 2.4 Hz, 1H), 3.62 (s, 3H), 3.56 (d, *J* = 7.6 Hz, 1H), 2.46 (ddd, *J* = 13.6, 9.6, 8.4 Hz, 1H), 1.98 (ddd, *J* = 13.6, 6.0, 2.4 Hz, 1H). <sup>13</sup>C NMR (101 MHz, CDCl<sub>3</sub>) δ 174.88, 141.15, 137.38, 135.68, 133.53, 133.40, 130.17, 128.74, 124.59, 121.07, 119.39, 119.31,

118.94, 109.70, 108.78, 64.88, 60.68, 55.03, 41.42, 36.21, 29.24. HRMS (ESI+) Calcd. For  $C_{23}H_{22}ClN_2O_2$  ( $[M+H]^+$ ): 393.1364, found: 393.1358. The product was analyzed by HPLC to determine the enantiomeric excess: 99% ee (Chiralpak AS-H, *i*-propanol/hexane = 8/92, flow rate 1.0 mL/min,  $\lambda$  = 254 nm);  $t_r$  = 28.69 and 34.54 min.

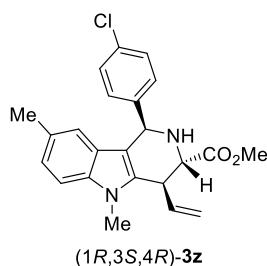

**Methyl (1*R*,3*S*,4*R*)-1-(4-chlorophenyl)-5,8-dimethyl-4-vinyl-2,3,4,5-tetrahydro-1*H*-pyrido**

**[4,3-*b*]indole-3-carboxylate (1*R*,3*S*,4*R*-**3z**):** Yield (92%); white solid; m.p. = 48 °C.  $[\alpha]_D^{20}$  = +97.1 (*c* 1.2,  $CH_2Cl_2$ );  $^1H$  NMR (400 MHz,  $CDCl_3$ )  $\delta$  7.36-7.32 (m, 2H), 7.29-7.24 (m, 2H), 7.16 (d,  $J$  = 8.4 Hz, 1H), 6.96 (dd,  $J$  = 8.4, 1.2 Hz, 1H), 6.62 (s, 1H), 6.21 (ddd,  $J$  = 17.2, 10.0, 6.8 Hz, 1H), 5.38 (s, 1H), 5.30 (d,  $J$  = 10.0 Hz, 1H), 5.11 (d,  $J$  = 17.2 Hz, 1H), 4.18 (dd,  $J$  = 6.8, 1.2 Hz, 1H), 3.89 (d,  $J$  = 2.4 Hz, 1H), 3.70 (s, 3H), 3.63 (s, 3H), 2.26 (s, 3H).  $^{13}C$  NMR (101 MHz,  $CDCl_3$ )  $\delta$  172.72, 142.25, 138.65, 135.64, 133.55, 133.06, 129.95, 128.53, 128.24, 125.16, 122.77, 118.69, 117.73, 109.38, 108.49, 60.16, 54.12, 52.29, 39.03, 29.28, 21.32. HRMS (ESI+) Calcd. For  $C_{23}H_{24}ClN_2O_2$  ( $[M+H]^+$ ): 395.1521, found: 395.1515. The product was analyzed by HPLC to determine the enantiomeric excess: 99% ee (Chiralpak AD-H, *i*-propanol/hexane = 2/98, flow rate 1.0 mL/min,  $\lambda$  = 226 nm);  $t_r$  = 10.57 and 14.27 min.

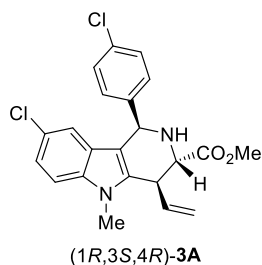

**Methyl (1*R*,3*S*,4*R*)-8-chloro-1-(4-chlorophenyl)-5-methyl-4-vinyl-2,3,4,5-tetrahydro-1*H*-pyrido**

**[4,3-*b*]indole-3-carboxylate (1*R*,3*S*,4*R*-**3A**):** Yield (96%); white solid; m.p. = 56 °C.  $[\alpha]_D^{20}$  = +54.3 (*c* 1.1,  $CH_2Cl_2$ );  $^1H$  NMR (400 MHz,  $CDCl_3$ )  $\delta$  7.34-7.31 (m, 2H), 7.30-7.27 (m, 2H), 7.17 (d,  $J$  =

8.4 Hz, 1H), 7.07 (dd,  $J = 8.8, 2.0$  Hz, 1H), 6.77 (d,  $J = 2.0$  Hz, 1H), 6.22 (ddd,  $J = 16.8, 10.4, 6.4$  Hz, 1H), 5.33 (d,  $J = 10.4$  Hz, 2H), 5.12 (d,  $J = 16.8$  Hz, 1H), 4.19 (d,  $J = 6.4$  Hz, 1H), 3.91 (d,  $J = 2.0$  Hz, 1H), 3.72 (s, 3H), 3.64 (s, 3H).  $^{13}\text{C}$  NMR (101 MHz,  $\text{CDCl}_3$ )  $\delta$  172.66, 141.71, 138.33, 135.68, 134.95, 133.41, 129.85, 128.72, 125.91, 124.73, 121.48, 118.36, 117.94, 109.81, 109.76, 60.14, 53.97, 52.39, 39.01, 29.45. HRMS (ESI+) Calcd. For  $\text{C}_{22}\text{H}_{21}\text{Cl}_2\text{N}_2\text{O}_2$  ( $[\text{M}+\text{H}]^+$ ): 415.0975, found: 415.0977. The product was analyzed by HPLC to determine the enantiomeric excess: 99% ee (Chiralpak AD-H, *i*-propanol/hexane = 2/98, flow rate 1.0 mL/min,  $\lambda = 238$  nm);  $t_r = 17.37$  and 30.53 min.

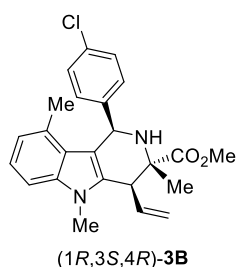

**Methyl (1R,3S,4R)-1-(4-chlorophenyl)-3,5,9-trimethyl-4-vinyl-2,3,4,5-tetrahydro-1H-pyrido**

**[4,3-*b*]indole-3-carboxylate (1R,3S,4R-3B):** Yield (85%); white solid; m.p. = 78 °C.  $[\alpha]_D^{20} = +131.0$  ( $c$  1.0,  $\text{CH}_2\text{Cl}_2$ );  $^1\text{H}$  NMR (400 MHz,  $\text{CDCl}_3$ )  $\delta$  7.28-7.21 (m, 2H), 7.20-7.16 (m, 2H), 7.11 (d,  $J = 8.0$  Hz, 1H), 7.05-7.00 (m, 1H), 6.66 (d,  $J = 7.2$  Hz, 1H), 6.01 (ddd,  $J = 17.2, 10.0, 8.4$  Hz, 1H), 5.68 (s, 1H), 5.23-5.31 (m, 2H), 4.09 (d,  $J = 8.4$  Hz, 1H), 3.65 (s, 3H), 3.62 (s, 3H), 1.88 (s, 3H), 1.34 (s, 3H).  $^{13}\text{C}$  NMR (101 MHz,  $\text{CDCl}_3$ )  $\delta$  175.90, 145.14, 137.86, 136.45, 136.37, 132.89, 130.38, 129.40, 128.74, 124.54, 121.45, 120.64, 118.64, 108.70, 106.46, 62.31, 55.89, 52.39, 43.89, 28.93, 24.95, 21.06. HRMS (ESI+) Calcd. For  $\text{C}_{24}\text{H}_{26}\text{ClN}_2\text{O}_2$  ( $[\text{M}+\text{H}]^+$ ): 409.1677, found: 409.1679. The product was analyzed by HPLC to determine the enantiomeric excess: 99% ee (Chiralpak AS-H, *i*-propanol/hexane = 2/98, flow rate 1.0 mL/min,  $\lambda = 238$  nm);  $t_r = 5.24$  and 6.64 min.

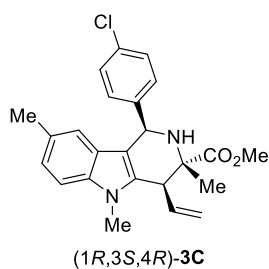

**Methyl (1*R*,3*S*,4*R*)-1-(4-chlorophenyl)-3,5,8-trimethyl-4-vinyl-2,3,4,5-tetrahydro-1*H*-pyrido**

**[4,3-*b*]indole-3-carboxylate (1*R*,3*S*,4*R*-3C):** Yield (84%); white solid; m.p. = 74 °C.  $[\alpha]^{20}_D = +141.3$  (*c* 0.9, CH<sub>2</sub>Cl<sub>2</sub>); <sup>1</sup>H NMR (400 MHz, CDCl<sub>3</sub>) δ 7.34 (d, *J* = 8.4 Hz, 2H), 7.27 (d, *J* = 8.4 Hz, 2H), 7.12 (d, *J* = 8.4 Hz, 1H), 6.92 (d, *J* = 8.4 Hz, 1H), 6.56 (s, 1H), 6.13-5.99 (m, 1H), 5.33 (s, 1H), 5.31-5.20 (m, 2H), 4.08 (d, *J* = 8.4 Hz, 1H), 3.63 (s, 3H), 3.62 (s, 3H), 2.24 (s, 3H), 1.36 (s, 3H). <sup>13</sup>C NMR (101 MHz, CDCl<sub>3</sub>) δ 176.07, 142.84, 136.84, 135.88, 135.79, 133.00, 129.97, 128.54, 128.03, 125.04, 122.57, 118.67, 118.24, 108.46, 108.43, 62.42, 55.21, 52.33, 43.42, 28.95, 25.22, 21.32. HRMS (ESI+) Calcd. For C<sub>24</sub>H<sub>26</sub>ClN<sub>2</sub>O<sub>2</sub> ([M+H]<sup>+</sup>): 409.1677, found: 409.1682. The product was analyzed by HPLC to determine the enantiomeric excess: 99% ee (Chiralpak AS-H, *i*-propanol/hexane = 2/98, flow rate 1.0 mL/min, λ = 238 nm); t<sub>r</sub> = 4.53 and 5.32 min.

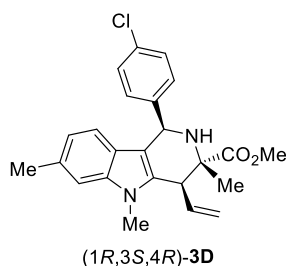

**Methyl (1*R*,3*S*,4*R*)-1-(4-chlorophenyl)-3,5,7-trimethyl-4-vinyl-2,3,4,5-tetrahydro-1*H*-pyrido**

**[4,3-*b*]indole-3-carboxylate (1*R*,3*S*,4*R*-3D):** Yield (88%); white solid; m.p. = 70 °C.  $[\alpha]^{20}_D = +113.3$  (*c* 1.3, CH<sub>2</sub>Cl<sub>2</sub>); <sup>1</sup>H NMR (400 MHz, CDCl<sub>3</sub>) δ 7.38-7.31 (m, 2H), 7.30-7.23 (m, 2H), 7.04 (s, 1H), 6.72-6.62 (m, 2H), 6.06 (ddd, *J* = 17.2, 10.0, 8.8 Hz, 1H), 5.34 (s, 1H), 5.32-5.21 (m, 2H), 4.09 (d, *J* = 8.8 Hz, 1H), 3.64 (s, 3H), 3.62 (s, 3H), 2.41 (s, 3H), 1.37 (s, 3H). <sup>13</sup>C NMR (101 MHz, CDCl<sub>3</sub>) δ 176.12, 142.81, 137.87, 136.92, 135.09, 133.03, 130.93, 129.99, 128.53, 122.69, 120.44, 118.65, 118.22, 108.94, 108.91, 62.45, 55.21, 52.36, 43.36, 28.88, 25.26, 21.76. HRMS (ESI+) Calcd. For C<sub>24</sub>H<sub>26</sub>ClN<sub>2</sub>O<sub>2</sub> ([M+H]<sup>+</sup>): 409.1677, found: 409.1676. The product was analyzed by HPLC to determine the enantiomeric excess: 99% ee (Chiralpak AS-H, *i*-propanol/hexane = 2/98, flow rate 1.0 mL/min, λ = 238 nm); t<sub>r</sub> = 4.66 and 5.71 min.

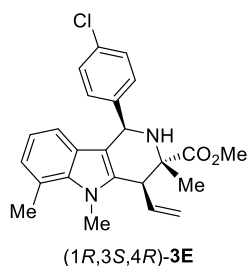

**Methyl (1R,3S,4R)-1-(4-chlorophenyl)-3,5,7-trimethyl-4-vinyl-2,3,4,5-tetrahydro-1H-pyrido**

**[4,3-*b*]indole-3-carboxylate (1R,3S,4R)-3E**: Yield (95%); white solid; m.p. = 72 °C.  $[\alpha]_D^{20} = +40.9$  (*c* 0.9, CH<sub>2</sub>Cl<sub>2</sub>); <sup>1</sup>H NMR (400 MHz, CDCl<sub>3</sub>) δ 7.32 (d, *J* = 8.4 Hz, 2H), 7.25 (d, *J* = 8.4 Hz, 2H), 6.78 (d, *J* = 6.8 Hz, 1H), 6.69 (t, *J* = 7.6 Hz, 1H), 6.59 (d, *J* = 8.0 Hz, 1H), 6.06 (ddd, *J* = 17.2, 10.0, 8.4 Hz, 1H), 5.35-5.21 (m, 3H), 4.08 (d, *J* = 8.4 Hz, 1H), 3.92 (s, 3H), 3.65 (s, 3H), 2.73 (s, 3H), 1.37 (s, 3H). <sup>13</sup>C NMR (101 MHz, CDCl<sub>3</sub>) δ 176.09, 142.76, 136.84, 136.29, 136.19, 133.03, 130.01, 128.54, 125.62, 124.26, 120.73, 118.91, 118.40, 117.12, 109.10, 62.53, 55.15, 52.37, 43.39, 32.04, 25.28, 20.34. HRMS (ESI+) Calcd. For C<sub>24</sub>H<sub>26</sub>ClN<sub>2</sub>O<sub>2</sub> ([M+H]<sup>+</sup>): 409.1677, found: 409.1677. The product was analyzed by HPLC to determine the enantiomeric excess: 99% ee (Chiralpak AS-H, *i*-propanol/hexane = 2/98, flow rate 1.0 mL/min, λ = 238 nm); t<sub>r</sub> = 5.24 and 6.13 min.

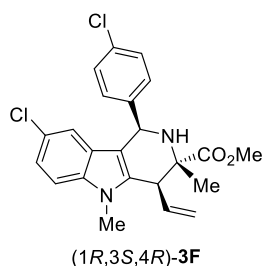

**Methyl (1R,3S,4R)-8-chloro-1-(4-chlorophenyl)-3,5-dimethyl-4-vinyl-2,3,4,5-tetrahydro-1H-**

**pyrido[4,3-*b*]indole-3-carboxylate (1R,3S,4R)-3F**: Yield (93%); white solid; m.p. = 54 °C.  $[\alpha]_D^{20} = +181.9$  (*c* 1.2, CH<sub>2</sub>Cl<sub>2</sub>); <sup>1</sup>H NMR (400 MHz, CDCl<sub>3</sub>) δ 7.35-7.30 (m, 2H), 7.30-7.26 (m, 2H), 7.14 (d, *J* = 8.8 Hz, 1H), 7.04 (dd, *J* = 8.8, 2.0 Hz, 1H), 6.73 (d, *J* = 2.0 Hz, 1H), 6.06 (ddd, *J* = 17.2, 10.0, 8.8 Hz, 1H), 5.32 (dd, *J* = 10.0, 1.2 Hz, 1H), 5.29-5.24 (m, 2H), 4.09 (d, *J* = 8.8 Hz, 1H), 3.65 (s, 3H), 3.64 (s, 3H), 1.37 (s, 3H). <sup>13</sup>C NMR (101 MHz, CDCl<sub>3</sub>) δ 176.00, 142.22, 137.18, 136.48, 135.90, 133.35, 129.86, 128.72, 125.79, 124.56, 121.30, 118.62, 118.30, 109.78, 108.81, 62.40, 55.05, 52.43, 43.54, 29.14, 25.11. HRMS (ESI+) Calcd. For C<sub>23</sub>H<sub>23</sub>Cl<sub>2</sub>N<sub>2</sub>O<sub>2</sub> ([M+H]<sup>+</sup>): 429.1131, found: 429.1132. The product was analyzed by HPLC to determine the enantiomeric excess: 99% ee

(Chiralpak AS-H, *i*-propanol/hexane = 2/98, flow rate 1.0 mL/min,  $\lambda$  = 248 nm);  $t_r$  = 5.82 and 7.05 min.

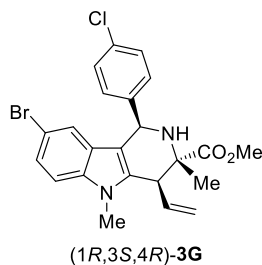

**Methyl (1*R*,3*S*,4*R*)-8-bromo-1-(4-chlorophenyl)-3,5-dimethyl-4-vinyl-2,3,4,5-tetrahydro-1*H*-pyrido[4,3-*b*]indole-3-carboxylate (1*R*,3*S*,4*R*-**3G**):** Yield (80%); white solid; m.p. = 68 °C.  $[\alpha]_D^{20}$  = +395.6 (*c* 0.9, CH<sub>2</sub>Cl<sub>2</sub>); <sup>1</sup>H NMR (400 MHz, CDCl<sub>3</sub>)  $\delta$  7.35-7.30 (m, 2H), 7.30-7.26 (m, 2H), 7.16 (dd, *J* = 8.8, 2.0 Hz, 1H), 7.09 (d, *J* = 8.8 Hz, 1H), 6.89 (d, *J* = 2.0 Hz, 1H), 6.05 (ddd, *J* = 17.2, 10.0, 8.8 Hz, 1H), 5.32 (dd, *J* = 10.0, 1.6 Hz, 1H), 5.30-5.23 (m, 2H), 4.09 (d, *J* = 8.7 Hz, 1H), 3.65 (s, 3H), 3.63 (s, 3H), 1.37 (s, 3H). <sup>13</sup>C NMR (101 MHz, CDCl<sub>3</sub>)  $\delta$  175.96, 142.19, 137.04, 136.43, 136.15, 133.33, 129.83, 128.70, 126.44, 123.86, 121.32, 118.64, 112.15, 110.25, 108.72, 62.38, 55.01, 52.42, 43.50, 29.11, 25.08. HRMS (ESI+) Calcd. For C<sub>23</sub>H<sub>23</sub>BrClN<sub>2</sub>O<sub>2</sub> ([M+H]<sup>+</sup>): 473.0626, found: 473.0625. The product was analyzed by HPLC to determine the enantiomeric excess: 99% ee (Chiralpak AS-H, *i*-propanol/hexane = 2/98, flow rate 1.0 mL/min,  $\lambda$  = 246 nm);  $t_r$  = 5.81 and 7.19 min.

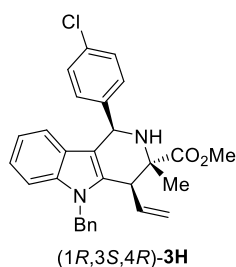

**Methyl (1*R*,3*S*,4*R*)-5-benzyl-1-(4-chlorophenyl)-3-methyl-4-vinyl-2,3,4,5-tetrahydro-1*H*-pyrido[4,3-*b*]indole-3-carboxylate (1*R*,3*S*,4*R*-**3H**):** Yield (95%); white solid; m.p. = 52 °C.  $[\alpha]_D^{20}$  = +131.3 (*c* 1.1, CH<sub>2</sub>Cl<sub>2</sub>); <sup>1</sup>H NMR (400 MHz, CDCl<sub>3</sub>)  $\delta$  7.41-7.35 (m, 2H), 7.32-7.26 (m, 4H), 7.26-7.24 (m, 1H), 7.12 (d, *J* = 8.0 Hz, 1H), 7.05-7.00 (m, 3H), 6.88-6.80 (m, 2H), 6.09 (ddd, *J* = 17.2, 10.0, 8.8 Hz, 1H), 5.43 (d, *J* = 0.8 Hz, 1H), 5.34-5.21 (m, 4H), 4.02 (d, *J* = 8.8 Hz, 1H), 3.50 (s, 3H), 1.32 (s,

3H).  $^{13}\text{C}$  NMR (101 MHz,  $\text{CDCl}_3$ )  $\delta$  175.89, 142.69, 137.83, 137.16, 137.08, 135.40, 133.14, 130.07, 128.61, 128.58, 127.20, 126.24, 125.12, 121.44, 119.20, 119.17, 118.47, 109.80, 109.45, 62.36, 55.16, 52.10, 46.10, 43.50, 25.14. HRMS (ESI+) Calcd. For  $\text{C}_{29}\text{H}_{28}\text{ClN}_2\text{O}_2$  ( $[\text{M}+\text{H}]^+$ ): 471.1834, found: 471.1841. The product was analyzed by HPLC to determine the enantiomeric excess: 99% ee (Chiralpak AS-H, *i*-propanol/hexane = 2/98, flow rate 0.5 mL/min,  $\lambda$  = 228 nm);  $t_r$  = 10.25 and 12.71 min.

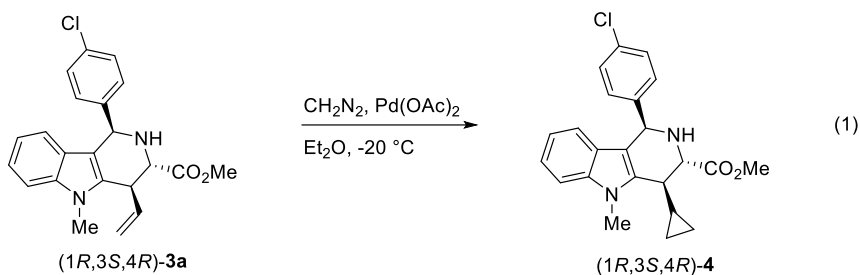

**Supplementary Figure 5.** Derivatization 1. Cyclopropanation of (1*R*,3*S*,4*R*)-**3a** for the synthesis of (1*R*,3*S*,4*R*)-**4**<sup>5</sup>.

Fresh prepared diazomethane solution (0.5 M in Et<sub>2</sub>O, 2 mL) and (1*R*,3*S*,4*R*)-**3a** (76.2 mg, 0.2 mmol) were added into a Schlenk tube. Under a positive nitrogen pressure, the reaction was cooled to -20 °C, and Pd(OAc)<sub>2</sub> (1.5 mg, 1 mol %) was added in one portion with gas evolution. After stirring for 1 hour in -20 °C, the reaction was moved to room temperature and stirred overnight. While the reaction was partly completed, the solvent was removed under reduced pressure and the residue was purified by a flash column chromatography (PE/EA = 6/1) to afford the product (1*R*,3*S*,4*R*)-**4**.

**Methyl (1*R*,3*S*,4*R*)-1-(4-chlorophenyl)-4-cyclopropyl-5-methyl-2,3,4,5-tetrahydro-1*H*-pyrido**

**[4,3-*b*]indole-3-carboxylate (1*R*,3*S*,4*R*)-**4**:** Yield (94%); white solid; m.p. = 62 °C. [ $\alpha$ ]<sub>D</sub><sup>20</sup> = +11.8 (*c* 1.0, CH<sub>2</sub>Cl<sub>2</sub>); <sup>1</sup>H NMR (400 MHz, CDCl<sub>3</sub>)  $\delta$  7.38 (d, *J* = 8.4 Hz, 2H), 7.29-7.25 (m, 3H), 7.12 (t, *J* = 7.2 Hz, 1H), 6.86 (t, *J* = 7.2 Hz, 1H), 6.78 (d, *J* = 8.0 Hz, 1H), 5.44 (s, 1H), 4.12 (d, *J* = 1.2 Hz, 1H), 3.75 (s, 3H), 3.65 (s, 3H), 2.87 (d, *J* = 9.2 Hz, 1H), 2.27 (brs, 1H), 1.46-1.38 (m, 1H), 0.83-0.72 (m, 2H), 0.71-0.62 (m, 1H), 0.37 (td, *J* = 10.0, 5.2 Hz, 1H). <sup>13</sup>C NMR (101 MHz, CDCl<sub>3</sub>)  $\delta$  173.33, 142.79, 137.33, 136.37, 133.08, 129.99, 128.58, 125.05, 121.13, 119.02, 118.93, 109.04, 108.85, 61.48, 54.47, 52.16, 38.96, 30.09, 17.27, 6.75, 3.77. HRMS (ESI<sup>+</sup>) Calcd. For C<sub>23</sub>H<sub>24</sub>ClN<sub>2</sub>O<sub>2</sub> ([M+H]<sup>+</sup>): 395.1521, found: 395.1513. The product was analyzed by HPLC to determine the enantiomeric excess: 98% ee (Chiralpak AD-H, *i*-propanol/hexane = 2/98, flow rate 1.0 mL/min,  $\lambda$  = 282 nm); *t*<sub>r</sub> = 16.28 and 21.08 min.

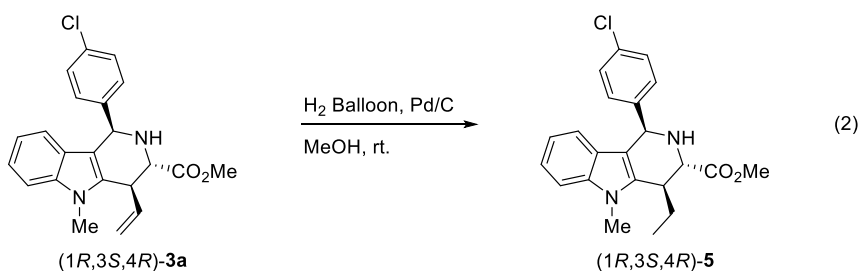

**Supplementary Figure 6.** Derivatization 2. Hydrogenation of (1*R*,3*S*,4*R*)-**3a** for the synthesis of (1*R*,3*S*,4*R*)-**5**<sup>6</sup>.

Pd/C (21.0 mg, palladium on activated carbon, 10% Pd basis, 1 mol %) was added to a solution of (1*R*,3*S*,4*R*)-**3a** (76.2 mg, 0.2 mmol) in anhydrous MeOH (4 mL). The reaction mixture was stirred under H<sub>2</sub> atmosphere (1 atm) at room temperature for 6 hours. After the reaction was completed (monitored by TLC), the crude reaction mixture was filtrated with celite and washed with MeOH. The solvent was removed under reduced pressure, then the residue was purified by a flash column chromatography (PE/EA = 6/1) to afford the product (1*R*,3*S*,4*R*)-**5**.

**Methyl (1*R*,3*S*,4*R*)-1-(4-chlorophenyl)-4-ethyl-5-methyl-2,3,4,5-tetrahydro-1*H*-pyrido**

**[4,3-*b*]indole-3-carboxylate (1*R*,3*S*,4*R*)-**5****: Yield (98%); white solid; m.p. = 58 °C.  $[\alpha]_D^{20} = -30.6$  (*c* 0.8, CH<sub>2</sub>Cl<sub>2</sub>); <sup>1</sup>H NMR (400 MHz, CDCl<sub>3</sub>)  $\delta$  7.35 (d, *J* = 8.0 Hz, 2H), 7.27 (d, *J* = 8.0 Hz, 2H), 7.24 (s, 1H), 7.10 (t, *J* = 7.6 Hz, 1H), 6.85 (t, *J* = 7.6 Hz, 1H), 6.77 (d, *J* = 8.0 Hz, 1H), 5.41 (s, 1H), 3.97 (s, 1H), 3.70 (s, 3H), 3.68 (s, 3H), 3.37 (d, *J* = 9.2 Hz, 1H), 2.09-2.01 (m, 1H), 1.94-1.85 (m, 1H), 1.16 (t, *J* = 7.6 Hz, 3H). <sup>13</sup>C NMR (101 MHz, CDCl<sub>3</sub>)  $\delta$  173.98, 142.89, 137.20, 136.94, 133.03, 129.99, 128.52, 125.06, 120.95, 118.91, 118.90, 108.84, 108.71, 57.47, 54.27, 52.18, 36.02, 29.19, 27.32, 12.53. HRMS (ESI+) Calcd. For C<sub>22</sub>H<sub>23</sub>ClN<sub>2</sub>O<sub>2</sub> ([M+H]<sup>+</sup>): 383.1521, found: 383.1506. The product was analyzed by HPLC to determine the enantiomeric excess: 99% ee (Chiralpak IE, *i*-propanol/hexane = 2/98, flow rate 1.0 mL/min,  $\lambda$  = 232 nm); *t<sub>r</sub>* = 9.86 and 10.79 min.

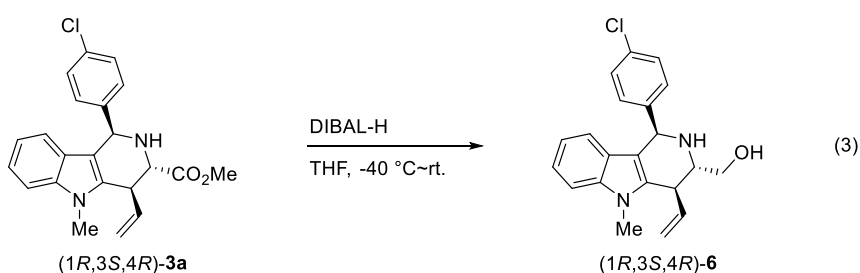

**Supplementary Figure 7.** Derivatization 3. Reduction of (1*R*,3*S*,4*R*)-**3a** for the synthesis of (1*R*,3*S*,4*R*)-**6**.

Under nitrogen atmosphere, to a solution of (1*R*,3*S*,4*R*)-**3a** (76.2 mg, 0.2 mmol) in anhydrous THF (2 mL) was added DIBAL-H (1.5 M, 0.4 mL, 0.6 mmol) dropwise at -40 °C. After stirring at -40 °C for 5 min, the reaction was then moved into room temperature and continuously stirred until

complete consumption of starting material (detected by TLC). The reaction mixture was quenched with H<sub>2</sub>O, extracted with EA (× 3) and filtered through celite to remove the colloid. The organic layer was combined, washed with brine, dried over Na<sub>2</sub>SO<sub>4</sub> before evaporation. Then the residue was purified by a flash column chromatography (pure EA) to afford the product (1*R*,3*S*,4*R*)-**6**.

**((1*R*,3*S*,4*R*)-1-(4-Chlorophenyl)-5-methyl-4-vinyl-2,3,4,5-tetrahydro-1*H*-pyrido[4,3-*b*]indol-3-yl)methanol (1*R*,3*S*,4*R*)-**6****: Yield (97%); white solid; m.p. = 52 °C.  $[\alpha]_D^{20} = +113.0$  (*c* 1.4, CH<sub>2</sub>Cl<sub>2</sub>); <sup>1</sup>H NMR (400 MHz, CDCl<sub>3</sub>) δ 7.31-7.23 (m, 5H), 7.20-7.14 (m, 1H), 6.98-6.90 (m, 2H), 5.95 (ddd, *J* = 17.2, 10.0, 7.2 Hz, 1H), 5.28 (d, *J* = 10.0 Hz, 1H), 5.24 (s, 1H), 5.06 (d, *J* = 17.2 Hz, 1H), 3.70-3.64 (m, 2H), 3.60 (s, 3H), 3.47-3.40 (m, 1H), 3.13-3.04 (m, 1H). <sup>13</sup>C NMR (101 MHz, CDCl<sub>3</sub>) δ 141.19, 138.60, 137.20, 134.88, 133.16, 129.85, 128.57, 124.98, 121.30, 119.16, 118.91, 118.16, 109.94, 108.82, 62.19, 57.23, 52.94, 39.12, 29.71. HRMS (ESI+) Calcd. For C<sub>29</sub>H<sub>28</sub>ClN<sub>2</sub>O<sub>2</sub> ([M+H]<sup>+</sup>): 353.1415, found: 353.1400. The product was analyzed by HPLC to determine the enantiomeric excess: 99% ee (Chiralpak AD-H, *i*-propanol/hexane = 15/85, flow rate 1.0 mL/min, λ = 282 nm); *t<sub>r</sub>* = 12.37 and 17.49 min.

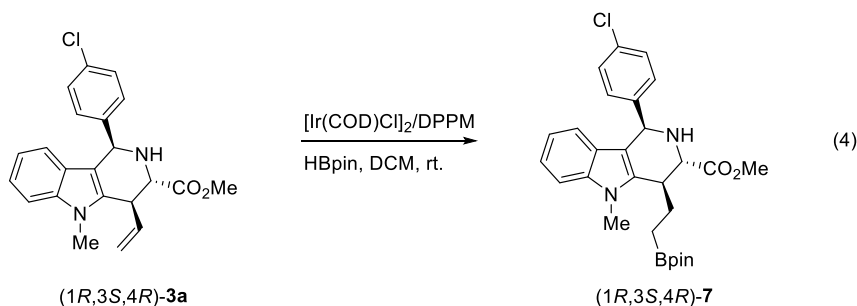

**Supplementary Figure 8.** Derivatization 4. Hydroboration of (1*R*,3*S*,4*R*)-**3a** for the synthesis of (1*R*,3*S*,4*R*)-**7**.

To a solution of [Ir(COD)Cl]<sub>2</sub> (4.0 mg, 3 mol %) and bis(diphenylphosphino)methane (DPPM, 4.6 mg, 6 mol %) in anhydrous DCM (2 mL) was added (1*R*,3*S*,4*R*)-**3a** (76.2 g, 0.2 mmol) in one portion under a positive argon pressure. Then 4,4,5,5-tetramethyl-1,3,2-dioxaborolane (HBpin, 58 μL, 0.4 mmol) was added at room temperature and the resulting solution was stirred overnight. The reaction mixture was quenched with MeOH (1 mL) and concentrated under reduced pressure. The residue was purified by silica-gel flash column chromatography (PE/EA = 3/1, with 1% MeOH) to afford the product (1*R*,3*S*,4*R*)-**7**.

**Methyl (1*R*,3*S*,4*R*)-1-(4-chlorophenyl)-5-methyl-4-(2-(4,4,5,5-tetramethyl-1,3,2-dioxaborolan-2-yl)ethyl)-2,3,4,5-tetrahydro-1*H*-pyrido[4,3-*b*]indole-3-carboxylate (1*R*,3*S*,4*R*-7):** Yield (86%); white solid; m.p. = 68 °C.  $[\alpha]^{20}_{\text{D}} = -32.3$  (*c* 0.9, CH<sub>2</sub>Cl<sub>2</sub>); <sup>1</sup>H NMR (400 MHz, CDCl<sub>3</sub>) δ 7.38-7.33 (m, 2H), 7.28-7.25 (m, 2H), 7.24 (d, *J* = 8.0 Hz, 1H), 7.09 (ddd, *J* = 8.0, 6.8, 1.2 Hz, 1H), 6.84 (ddd, *J* = 8.0, 6.8, 1.2 Hz, 1H), 6.74 (dt, *J* = 8.0, 0.8 Hz, 1H), 5.41 (d, *J* = 1.2 Hz, 1H), 3.99 (d, *J* = 2.0 Hz, 1H), 3.75 (s, 3H), 3.66 (s, 3H), 3.45 (ddd, *J* = 8.8, 3.6, 1.6 Hz, 1H), 2.12-2.04 (m, 1H), 2.03-1.96 (m, 1H), 1.27 (s, 12H). <sup>13</sup>C NMR (101 MHz, CDCl<sub>3</sub>) δ 174.02, 142.89, 137.22, 137.07, 132.99, 130.04, 128.50, 125.05, 120.86, 118.88, 118.82, 108.74, 108.68, 83.26, 57.10, 54.26, 52.10, 36.07, 29.16, 28.32, 24.94, 24.79. HRMS (ESI+) Calcd. For C<sub>28</sub>H<sub>35</sub>BClN<sub>2</sub>O<sub>4</sub> ([M+H]<sup>+</sup>): 509.2373, found: 509.2381. The product was analyzed by HPLC to determine the enantiomeric excess: 98% ee (Chiralpak OD-H, *i*-propanol/hexane = 5/95, flow rate 1.0 mL/min, λ = 228 nm); t<sub>r</sub> = 9.62 and 15.53 min.

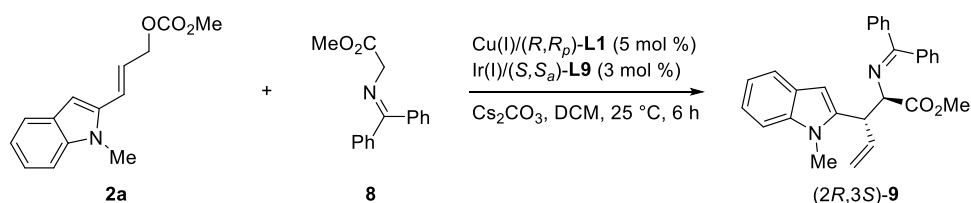

**Supplementary Figure 9.** Mechanism validation 1. Standard reaction of ketoimine ester **8** to synthesize (2*R*,3*S*)-**9**.

A flame dried Schlenk tube **A** was cooled to room temperature and filled with N<sub>2</sub>. To this flask were added [Ir(COD)Cl]<sub>2</sub> (0.003 mmol, 1.5 mol %), (*S,S<sub>a</sub>*)-Me-THQphos-**L9** (0.006 mmol, 3.0 mol %), degassed THF (0.5 mL) and degassed *n*-propylamine (0.5 mL). The reaction mixture was heated at 50 °C for 30 min and then the volatile solvents were removed under vacuum to gain a pale yellow solid. Meanwhile, Cu(MeCN)<sub>4</sub>BF<sub>4</sub> (0.01 mmol, 5 mol %) and (*R,R<sub>p</sub>*)-*i*Pr-Phosferrox-**L1** (0.011 mmol, 5.5 mol %) were dissolved in 1.0 mL of CH<sub>2</sub>Cl<sub>2</sub> in a Schlenk tube **B**, and stirred at room temperature for about 30 min. Substrate **2a** (0.20 mmol), ketoimine esters **8** (0.30 mmol), CH<sub>2</sub>Cl<sub>2</sub> (1.0 mL) and Cs<sub>2</sub>CO<sub>3</sub> (0.40 mmol) were added into the Schlenk tube **A** and filled with N<sub>2</sub>. The Cu/**L1** complex solution was then transferred from the Schlenk tube **B** to the Schlenk tube **A** *via* syringe. Finally, the reaction mixture was continuously stirred at room temperature under N<sub>2</sub> atmosphere. While the starting material was consumed (monitored by TLC), the solvent was removed by rotary evaporation to obtain a crude mixture, which was purified by flash column chromatography (PE/EA = 8/1) to give the product (2*R*,3*S*)-**9**.

**Methyl (2*R*,3*S*)-2-((diphenylmethylene)amino)-3-(1-methyl-1*H*-indol-2-yl)pent-**

**4-enoate (2*R*,3*S*)-**9**:** Yield (99%); white solid; m.p. = 52 °C. [α]<sub>D</sub><sup>20</sup> = +2.0 (*c* 0.4, CH<sub>2</sub>Cl<sub>2</sub>); <sup>1</sup>H NMR (400 MHz, CDCl<sub>3</sub>) δ 7.53-7.46 (m, 3H), 7.41-7.27 (m, 4H), 7.25-7.19 (m, 3H), 7.12 (t, *J* = 7.6 Hz, 1H), 7.04 (t, *J* = 7.6 Hz, 1H), 6.82 (d, *J* = 6.0 Hz, 2H), 6.24 (s, 1H), 5.89 (ddd, *J* = 17.6, 10.0, 8.4 Hz, 1H), 5.12 (d, *J* = 8.4 Hz, 1H), 5.08 (s, 1H), 4.55 (d, *J* = 8.4 Hz, 1H), 4.44 (t, *J* = 8.4 Hz, 1H), 3.69 (s, 3H), 3.67 (s, 3H). <sup>13</sup>C NMR (101 MHz, CDCl<sub>3</sub>) δ 171.39, 171.21, 139.19, 138.71, 137.02, 136.22, 135.62, 130.32, 128.78, 128.64, 128.10, 128.07, 127.87, 127.67, 120.71, 119.99, 119.08, 117.40, 108.93, 100.41, 70.41, 52.04, 45.54, 29.90. HRMS (ESI+) Calcd. For C<sub>28</sub>H<sub>26</sub>N<sub>2</sub>O<sub>2</sub> ([M+H]<sup>+</sup>): 423.2067, found: 423.2060. The product was analyzed by HPLC to determine the enantiomeric excess: 99% ee (Chiralpak OD-H, *i*-propanol/hexane = 2/98, flow rate 1.0 mL/min, λ = 226 nm); t<sub>r</sub> = 6.31 and 14.45 min.

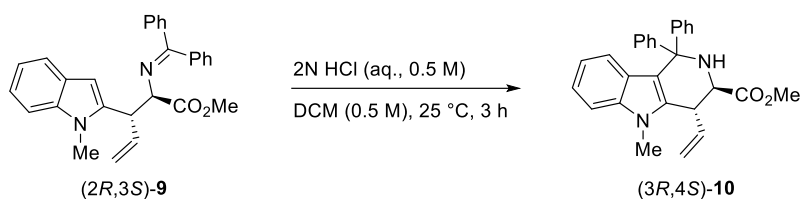

**Supplementary Figure 10.** Mechanism validation 2. Cyclization of (2*R*,3*S*)-**9** to synthesize (3*R*,4*S*)-**10**.

Diluted 2N HCl (aq., 2 mL) was added to a solution of (2*R*,3*S*)-**9** (84.4 mg, 0.2 mmol) in CH<sub>2</sub>Cl<sub>2</sub> (2 mL) at room temperature. After vigorously stirring for 3 hours, the organic layer was separated and the aqueous layer was extracted with CH<sub>2</sub>Cl<sub>2</sub>. The organic layer was combined, washed with brine and dried over Na<sub>2</sub>SO<sub>4</sub>. After filtration and evaporation, the residue was purified by a flash column chromatography (PE/EA = 8/1) to afford the product (3*R*,4*S*)-**10**.

**Methyl (3*R*,4*S*)-5-methyl-1,1-diphenyl-4-vinyl-2,3,4,5-tetrahydro-1*H*-pyrido[4,3-*b*]indole-**

**3-carboxylate (3*R*,4*S*)-**10****: Yield (46%); white solid; m.p. = 56 °C.  $[\alpha]_D^{20} = -166.3$  (*c* 0.9, CH<sub>2</sub>Cl<sub>2</sub>); <sup>1</sup>H NMR (400 MHz, CDCl<sub>3</sub>) δ 7.60 (d, *J* = 7.2 Hz, 2H), 7.36-7.24 (m, 4H), 7.21-7.16 (m, 3H), 7.11 (t, *J* = 7.6 Hz, 1H), 7.09-7.03 (m, 2H), 6.81 (t, *J* = 7.6 Hz, 1H), 6.60 (d, *J* = 8.0 Hz, 1H), 5.76 (ddd, *J* = 18.0, 10.0, 8.4 Hz, 1H), 5.24-5.13 (m, 2H), 4.12 (t, *J* = 8.4 Hz, 1H), 3.70 (s, 3H), 3.64 (s, 3H), 3.61 (d, *J* = 8.4 Hz, 1H). <sup>13</sup>C NMR (101 MHz, CDCl<sub>3</sub>) δ 172.69, 146.33, 144.40, 137.61, 137.06, 135.00, 128.99, 128.59, 127.99, 127.88, 127.10, 127.01, 126.20, 120.95, 120.50, 119.27, 118.54, 116.21, 108.65, 65.20, 59.94, 52.01, 41.26, 30.70. HRMS (ESI+) Calcd. For C<sub>28</sub>H<sub>26</sub>N<sub>2</sub>O<sub>2</sub> ([M+H]<sup>+</sup>): 423.2067, found: 423.2061. The product was analyzed by HPLC to determine the enantiomeric excess: 99% ee (Chiralpak AD-H, *i*-propanol/hexane = 2/98, flow rate 1.0 mL/min, λ = 226 nm); t<sub>r</sub> = 5.68 and 16.35 min.

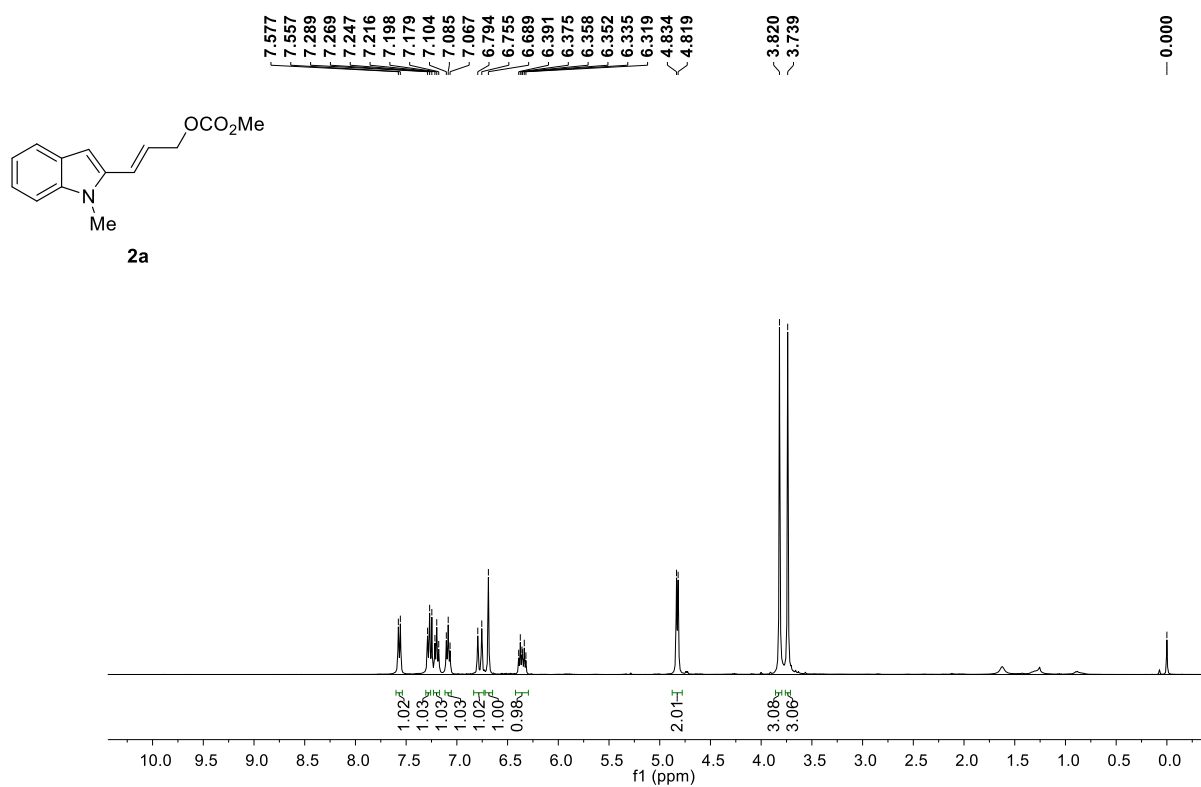

Supplementary Figure 11. <sup>1</sup>H NMR spectrum of **2a**

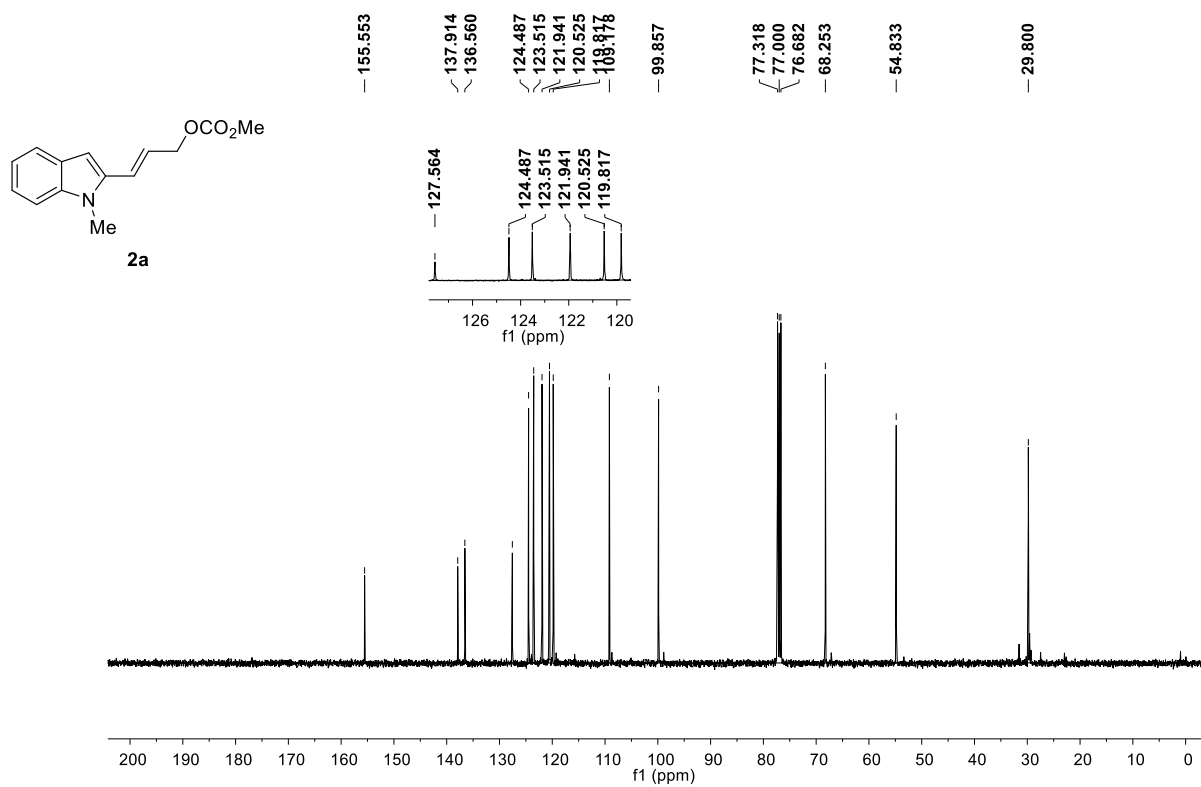

Supplementary Figure 12. <sup>13</sup>C NMR spectrum of **2a**

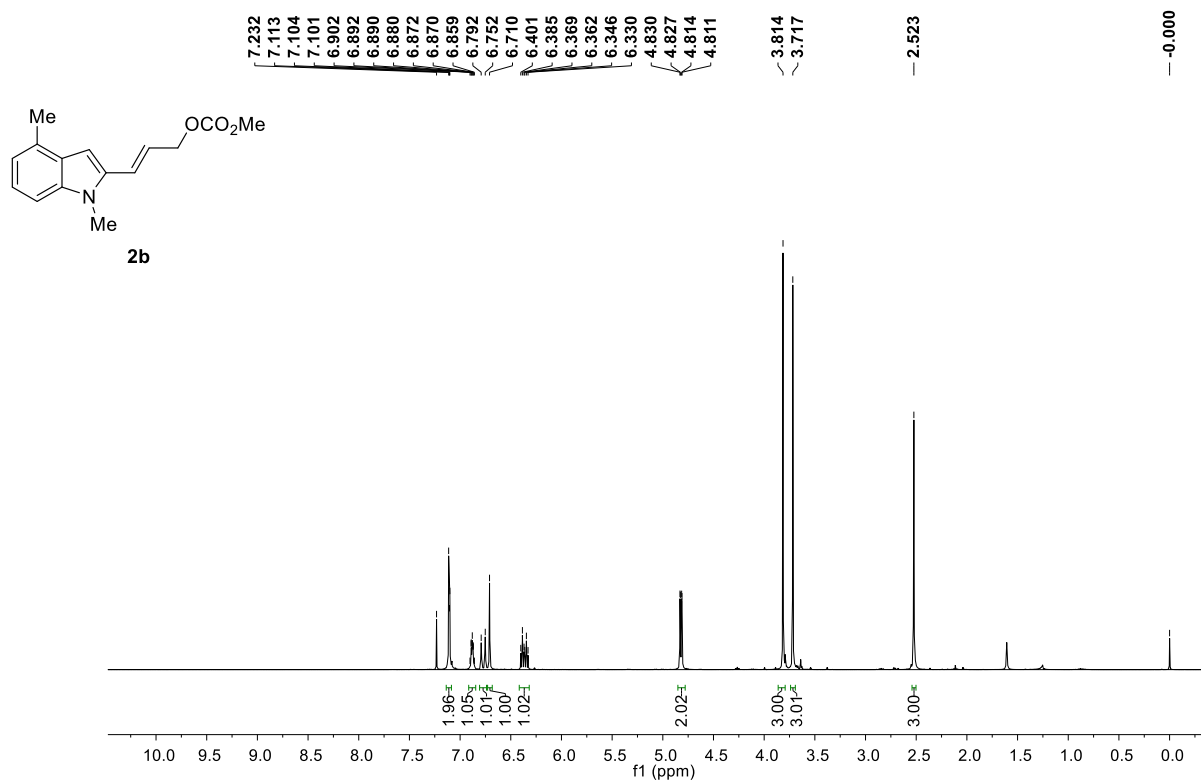

Supplementary Figure 13.  $^1\text{H}$  NMR spectrum of **2b**

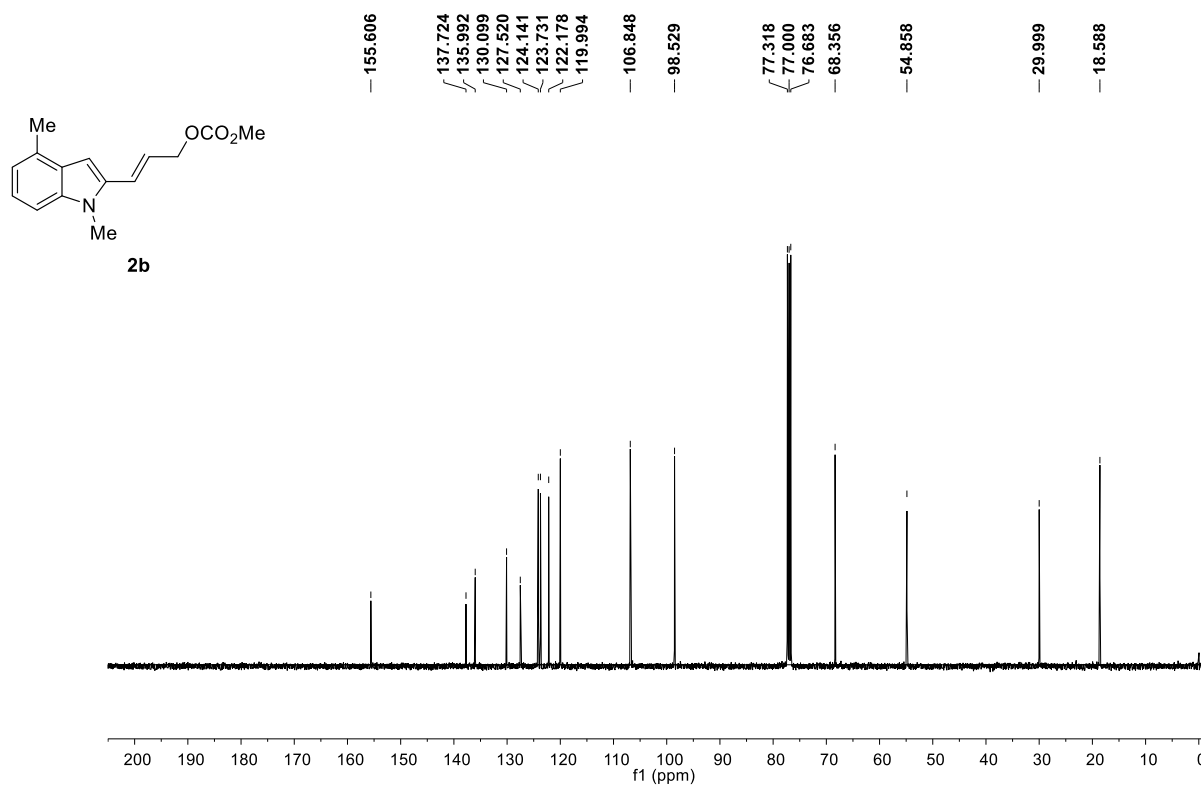

Supplementary Figure 14.  $^{13}\text{C}$  NMR spectrum of **2b**

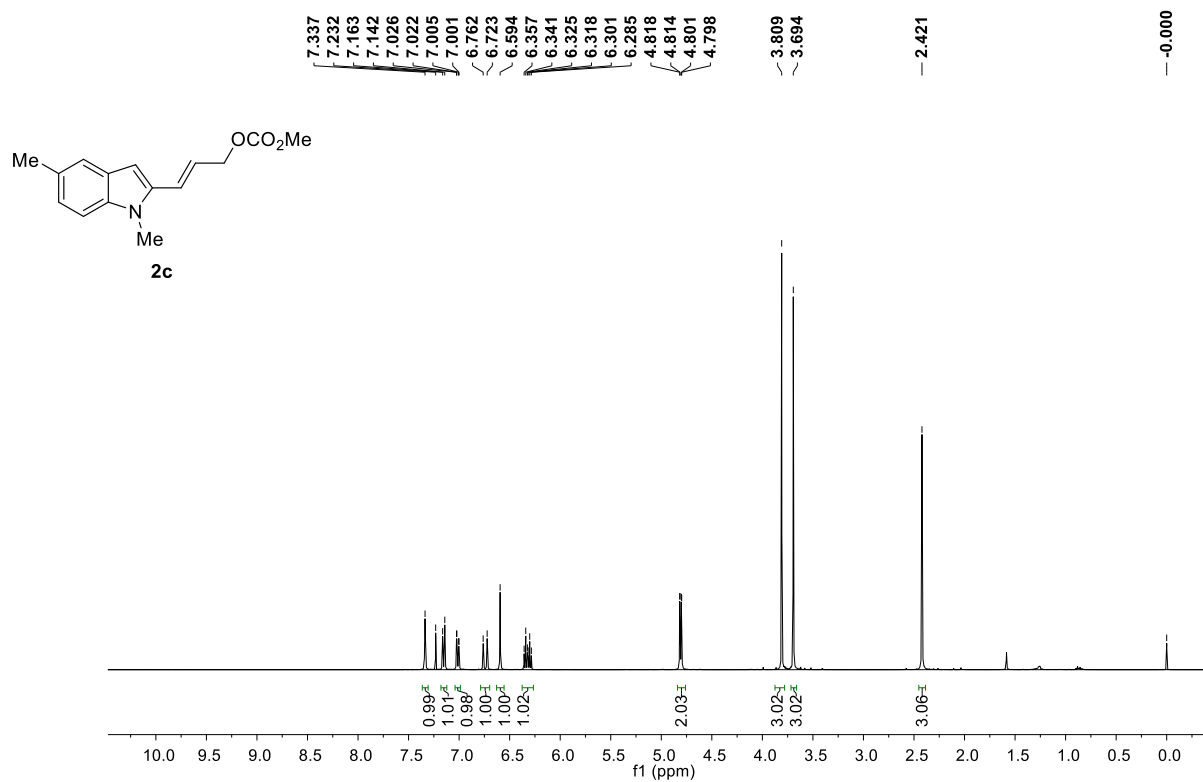

Supplementary Figure 15. <sup>1</sup>H NMR spectrum of **2c**

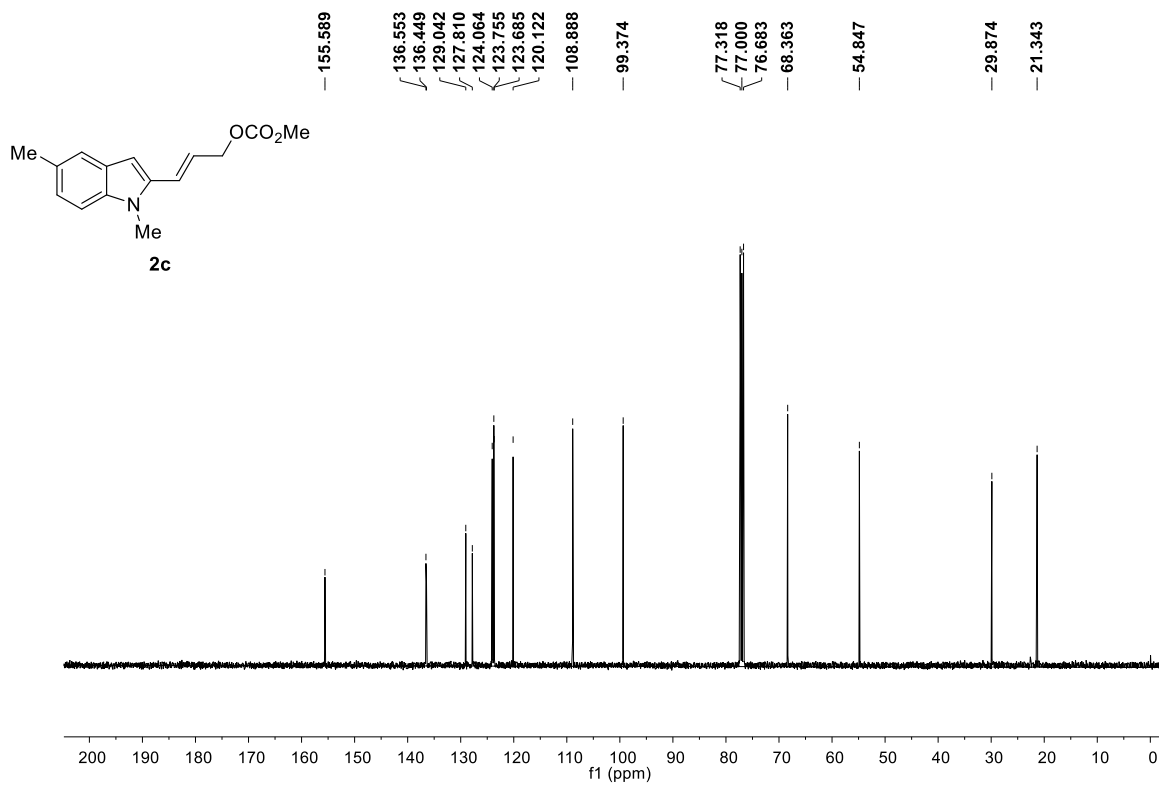

Supplementary Figure 16. <sup>13</sup>C NMR spectrum of **2c**

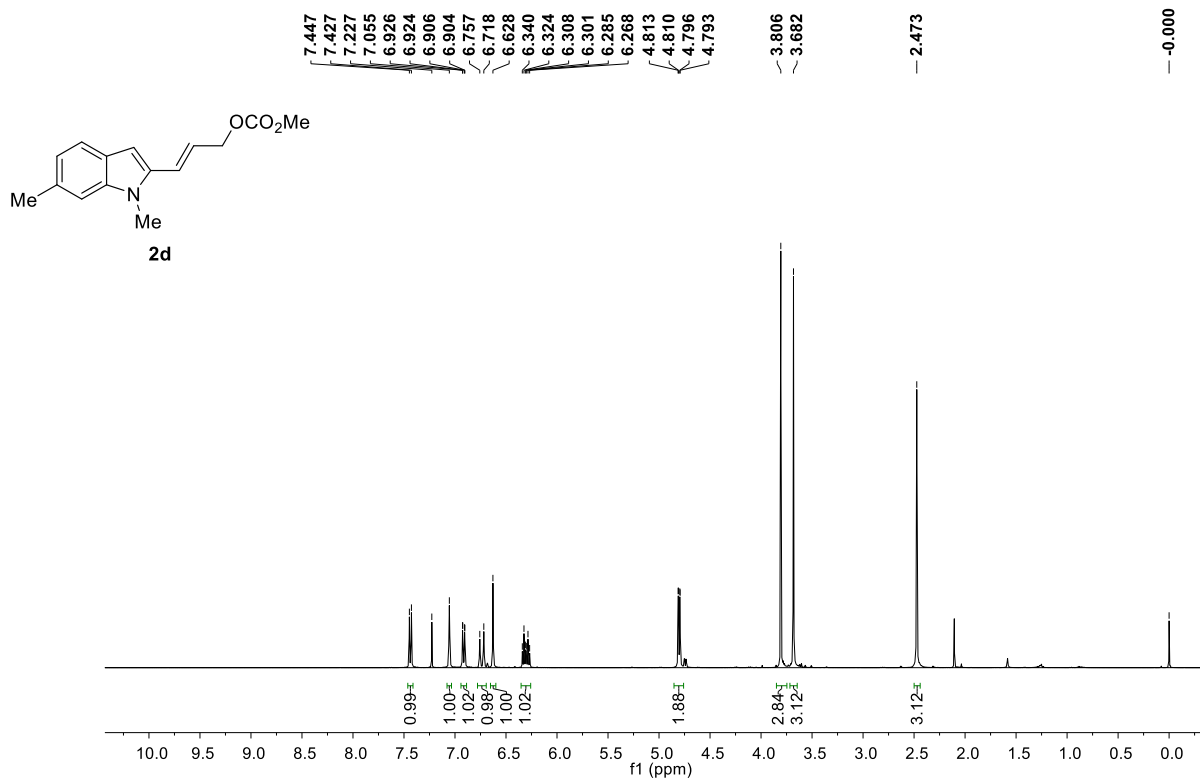

Supplementary Figure 17. <sup>1</sup>H NMR spectrum of **2d**

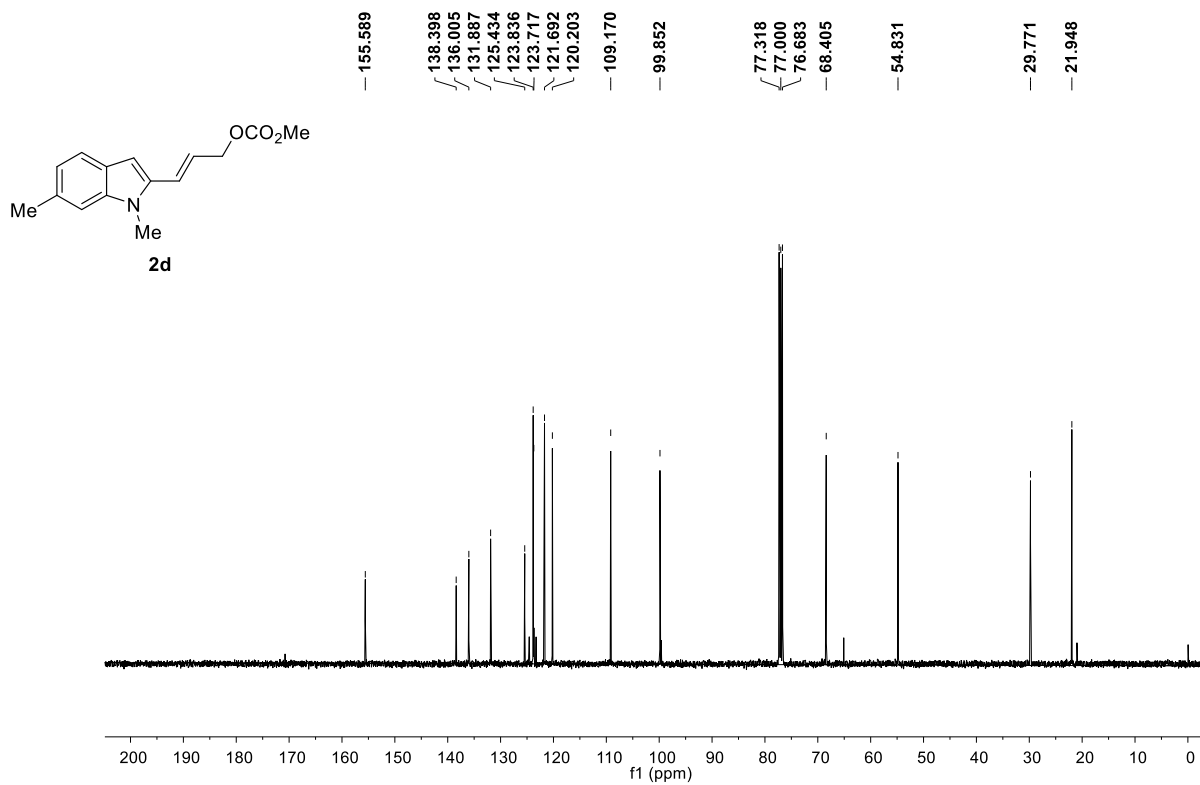

Supplementary Figure 18. <sup>13</sup>C NMR spectrum of **2d**

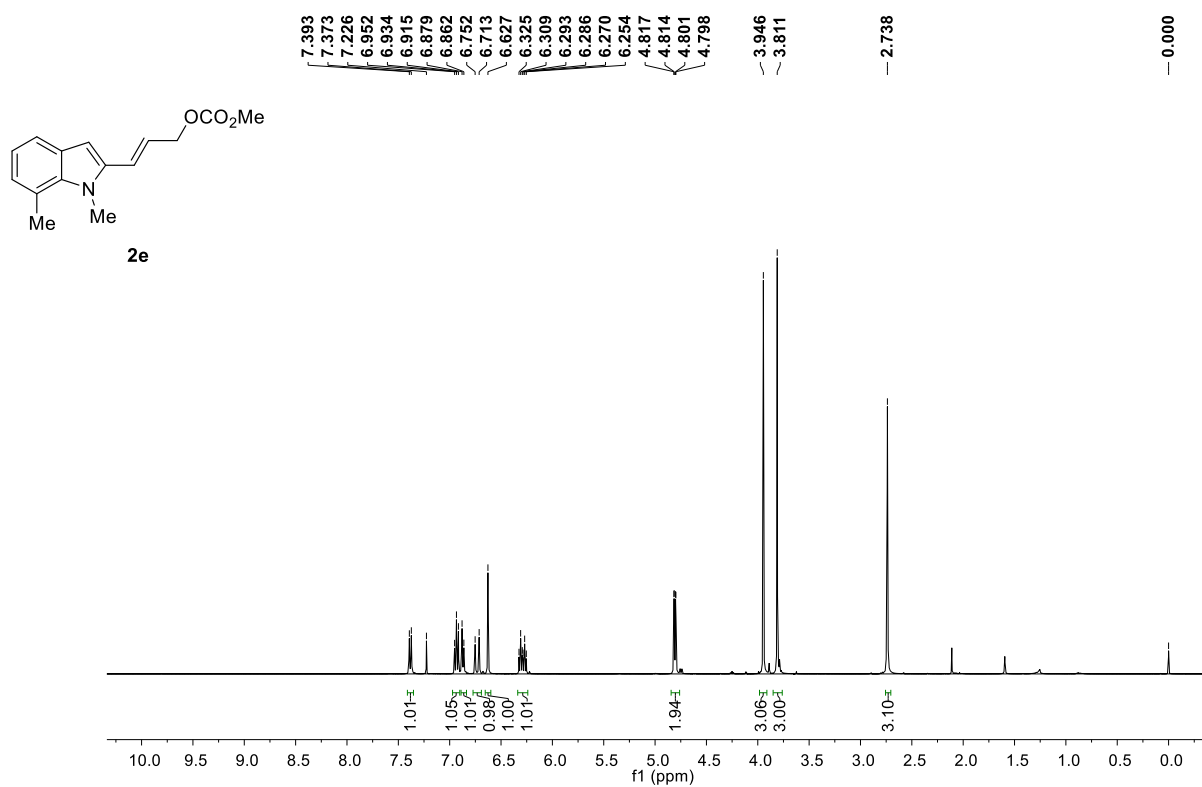

**Supplementary Figure 19. <sup>1</sup>H NMR spectrum of 2e**

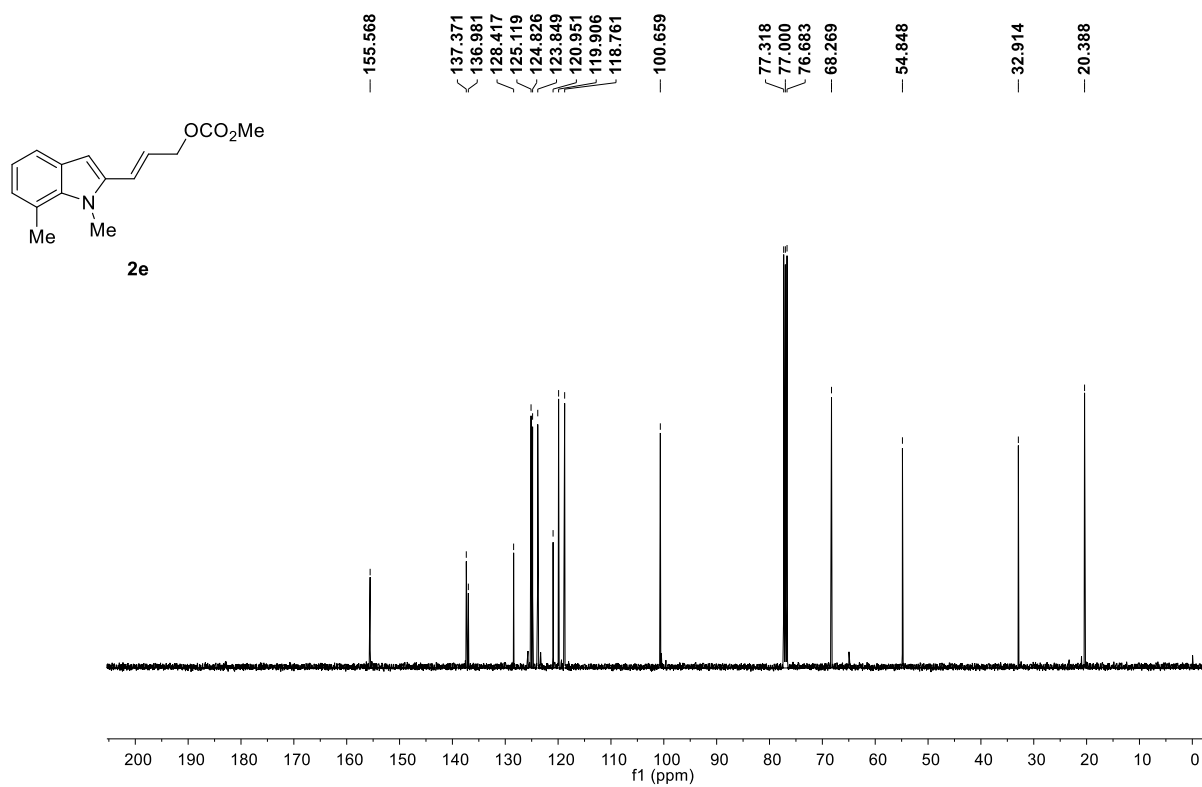

**Supplementary Figure 20. <sup>13</sup>C NMR spectrum of 2e**

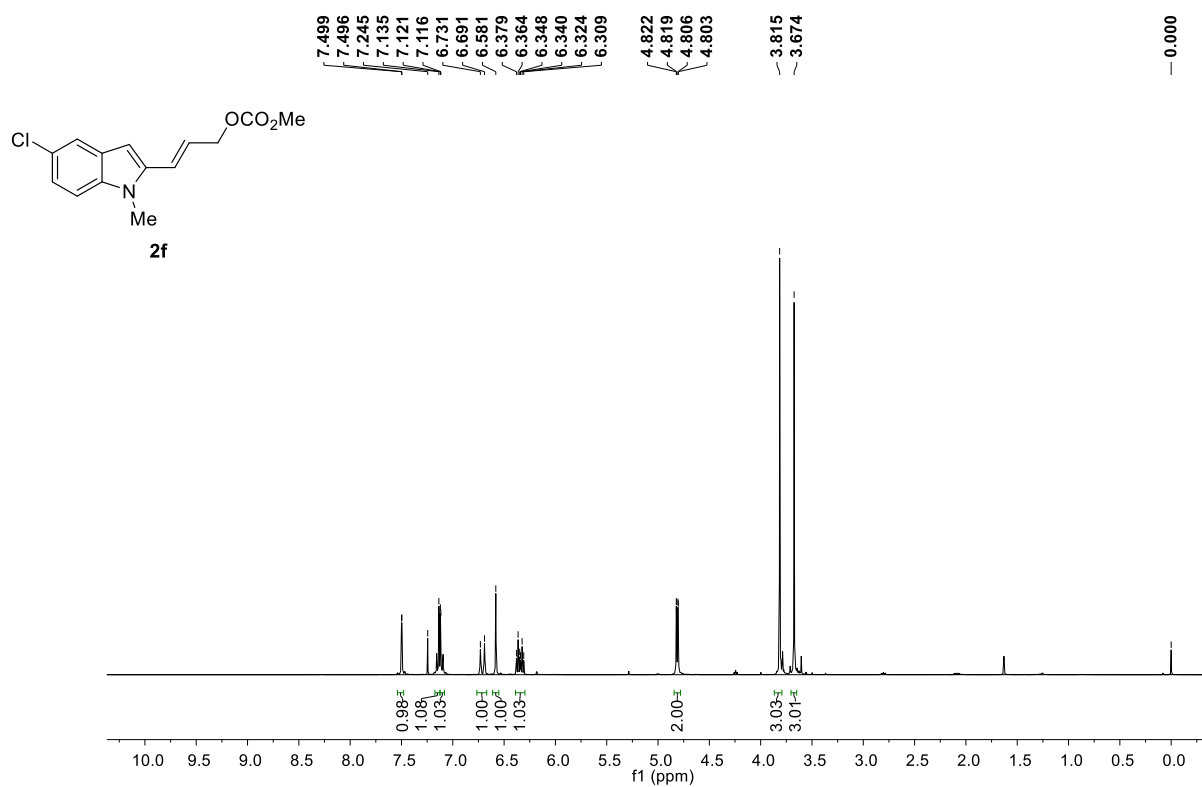

Supplementary Figure 21. <sup>1</sup>H NMR spectrum of **2f**

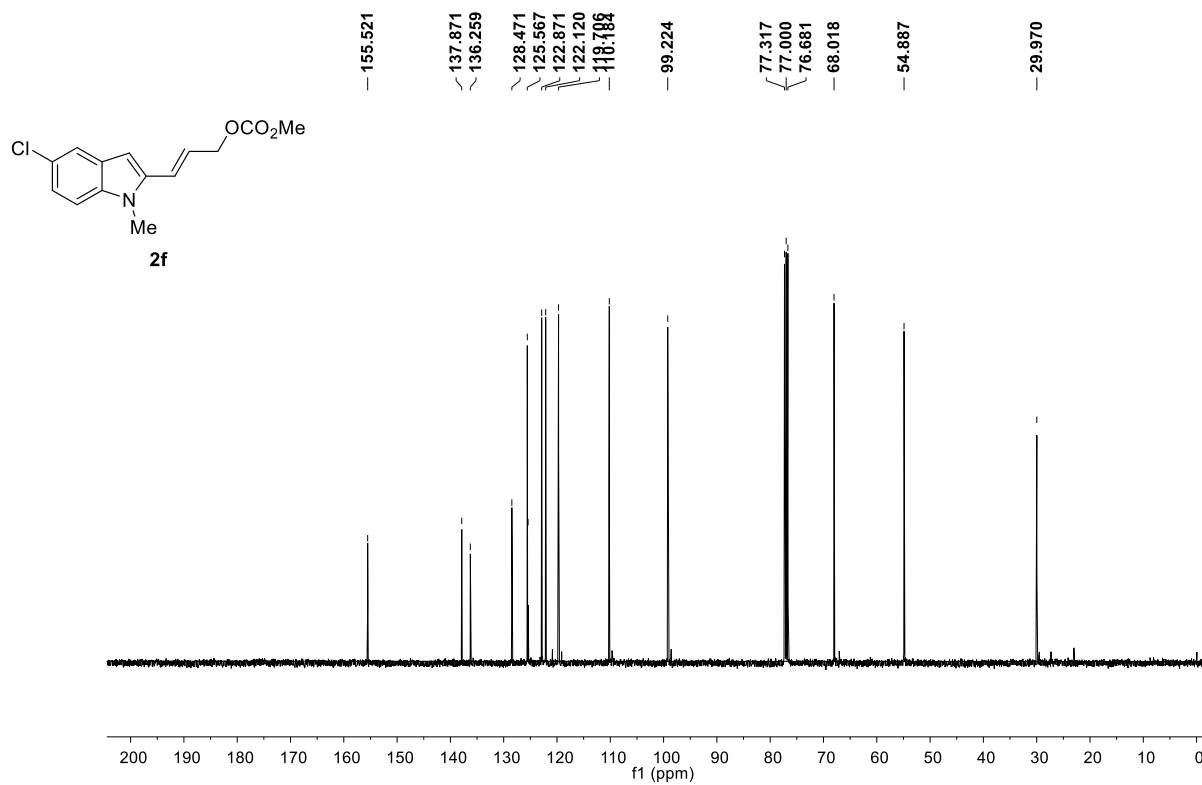

Supplementary Figure 22. <sup>13</sup>C NMR spectrum of **2f**

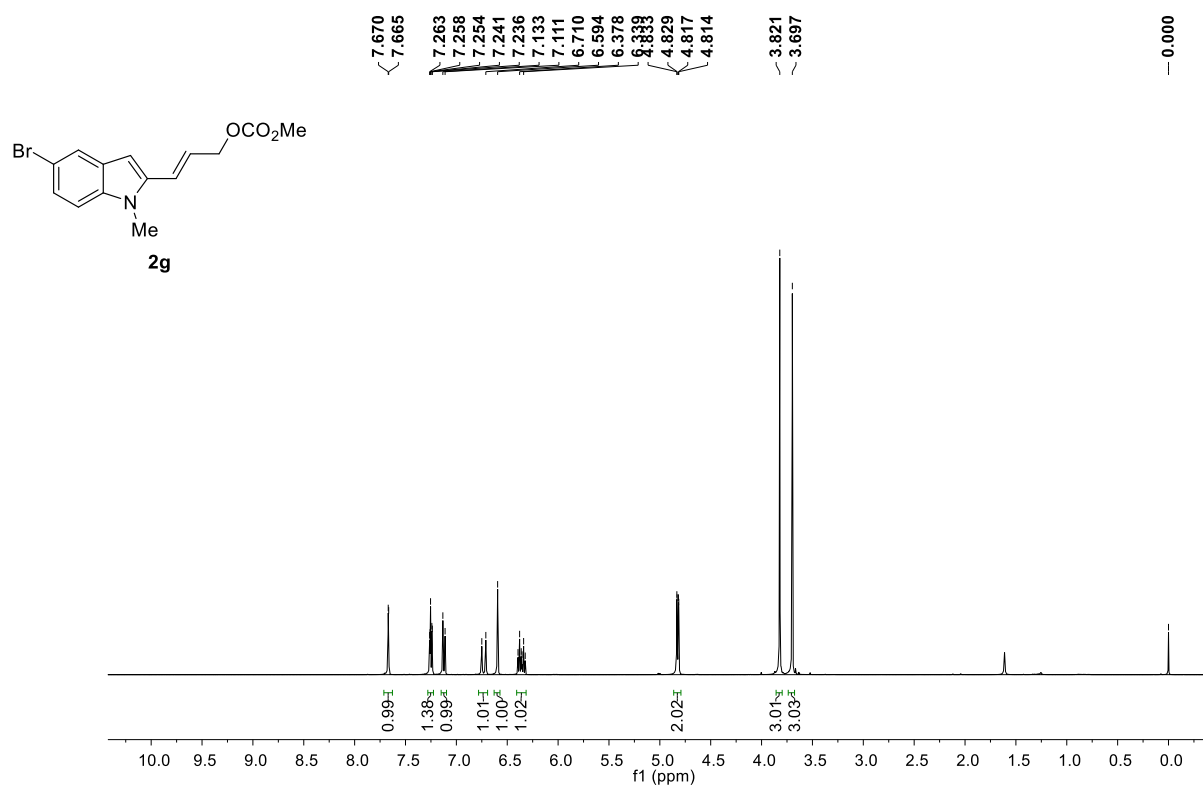

Supplementary Figure 23. <sup>1</sup>H NMR spectrum of **2g**

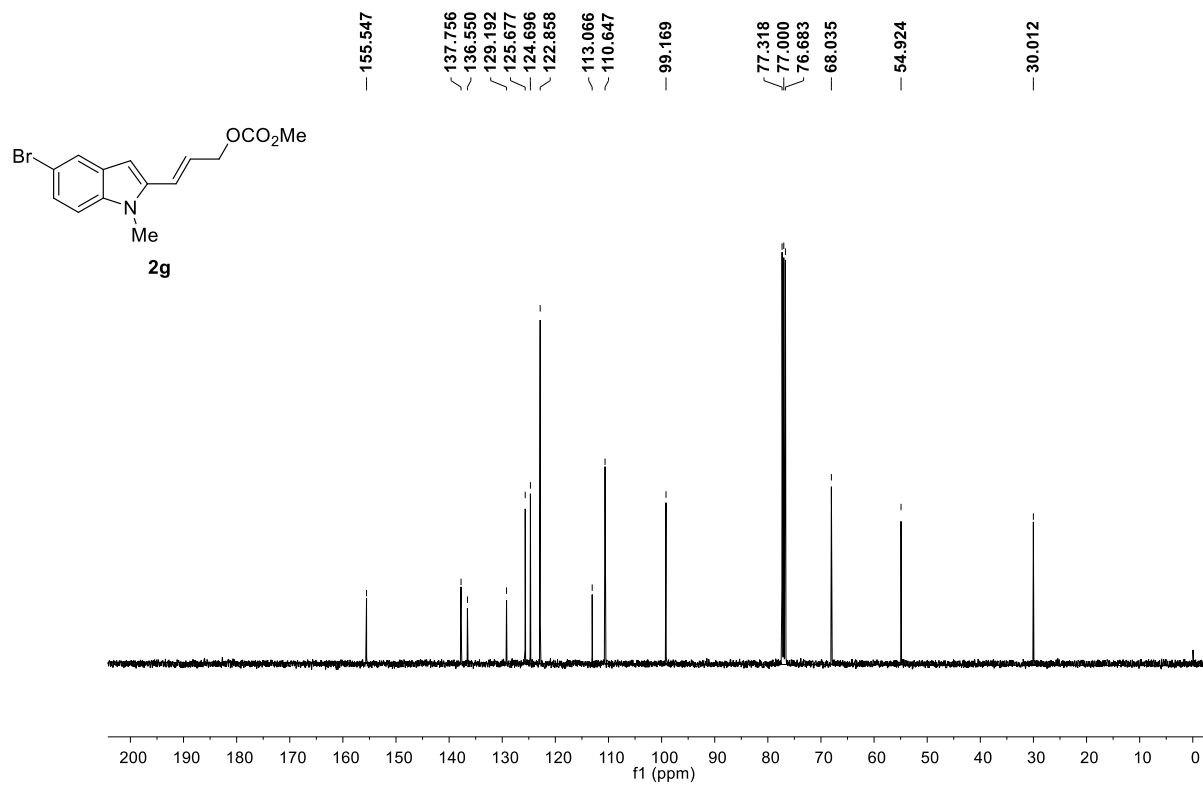

Supplementary Figure 24. <sup>13</sup>C NMR spectrum of **2g**

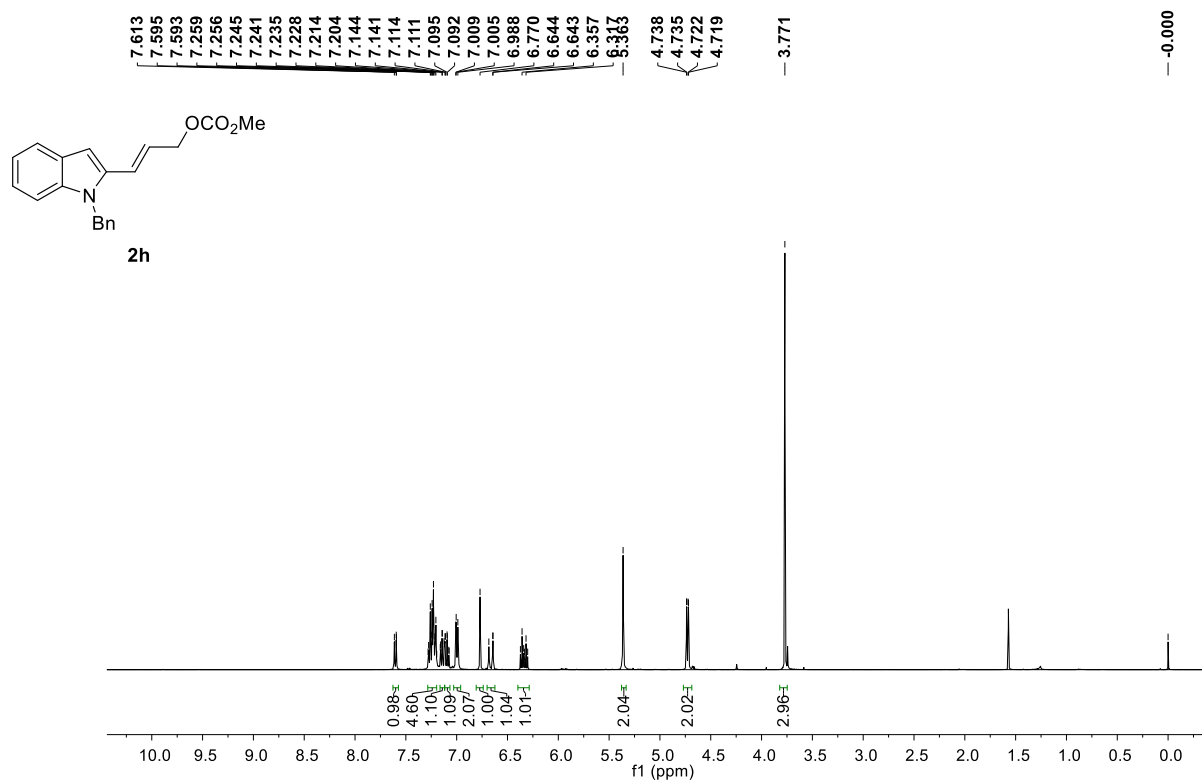

Supplementary Figure 25. <sup>1</sup>H NMR spectrum of **2h**

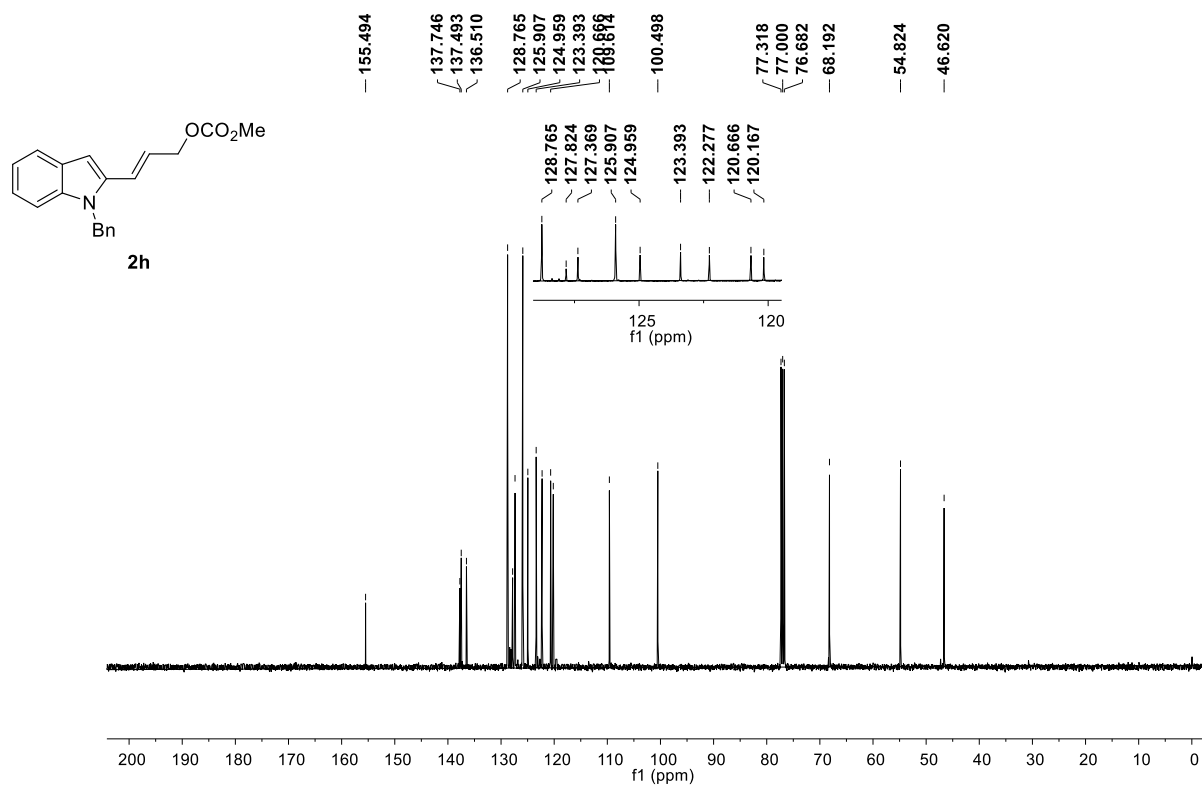

Supplementary Figure 26. <sup>13</sup>C NMR spectrum of **2h**

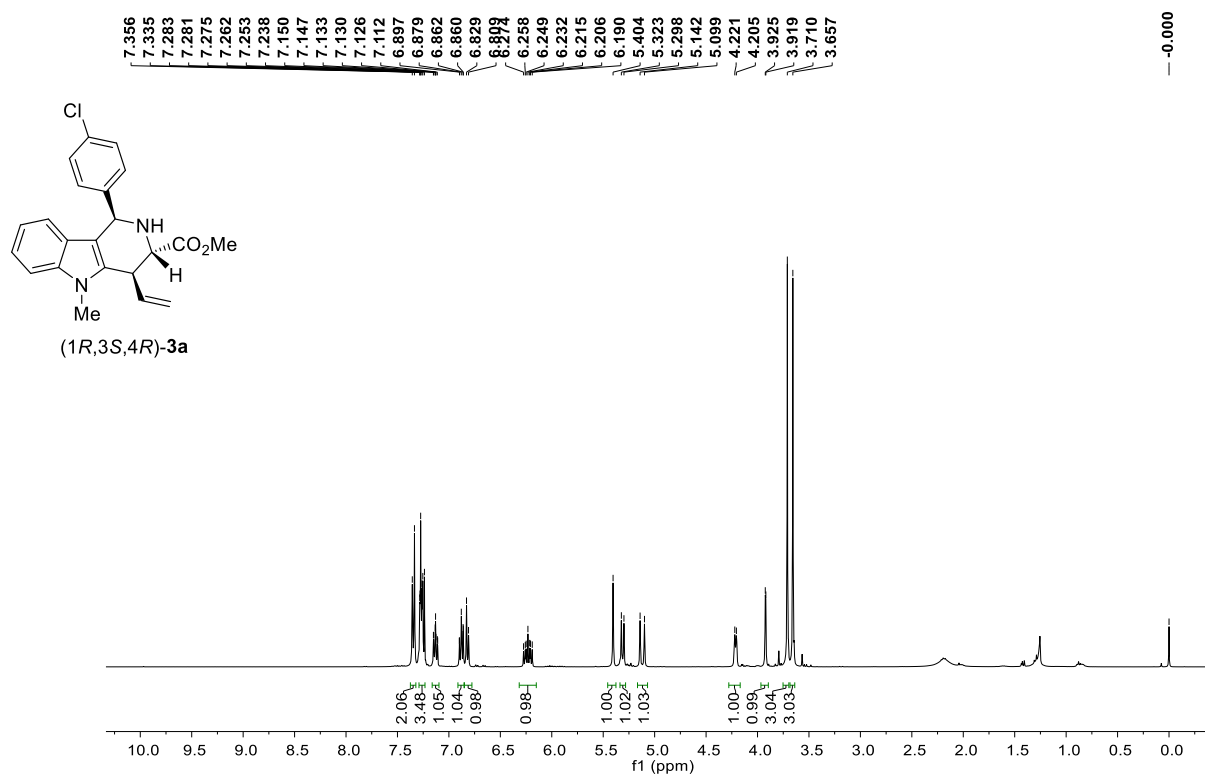

Supplementary Figure 27. <sup>1</sup>H NMR spectrum of (1*R*,3*S*,4*R*)-**3a**

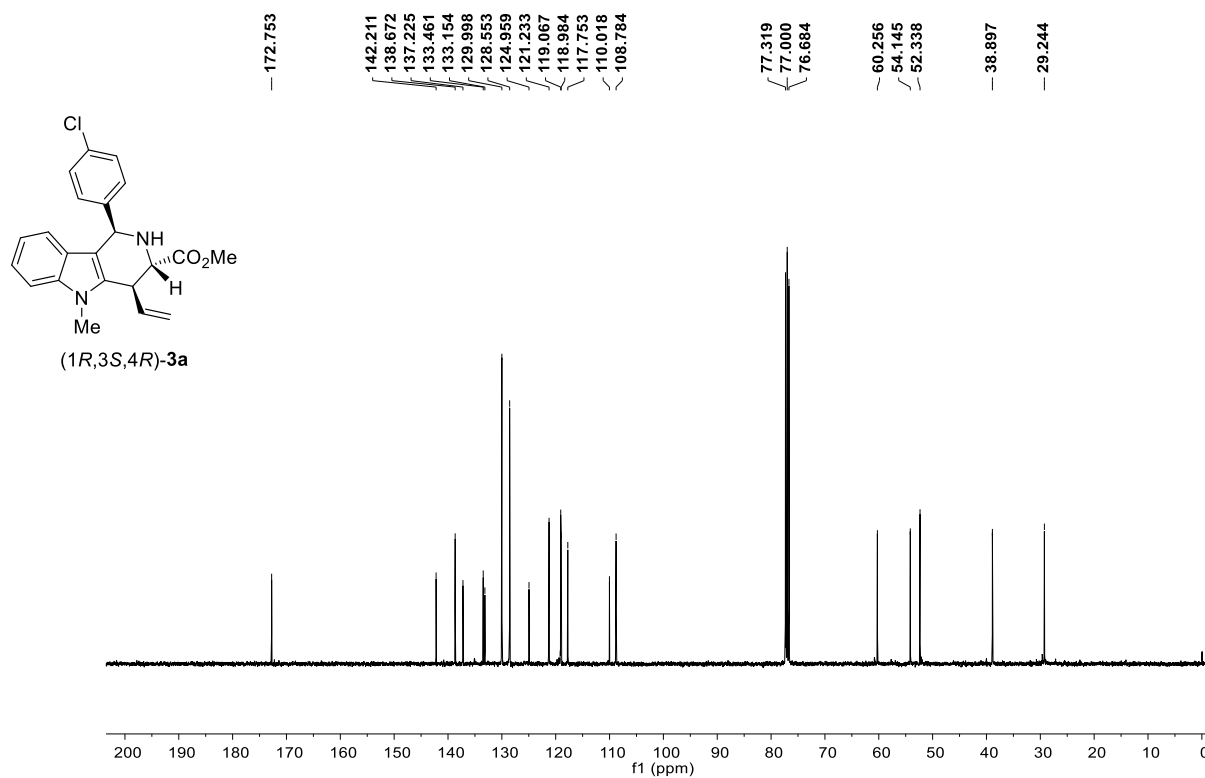

Supplementary Figure 28. <sup>13</sup>C NMR spectrum of (1*R*,3*S*,4*R*)-**3a**

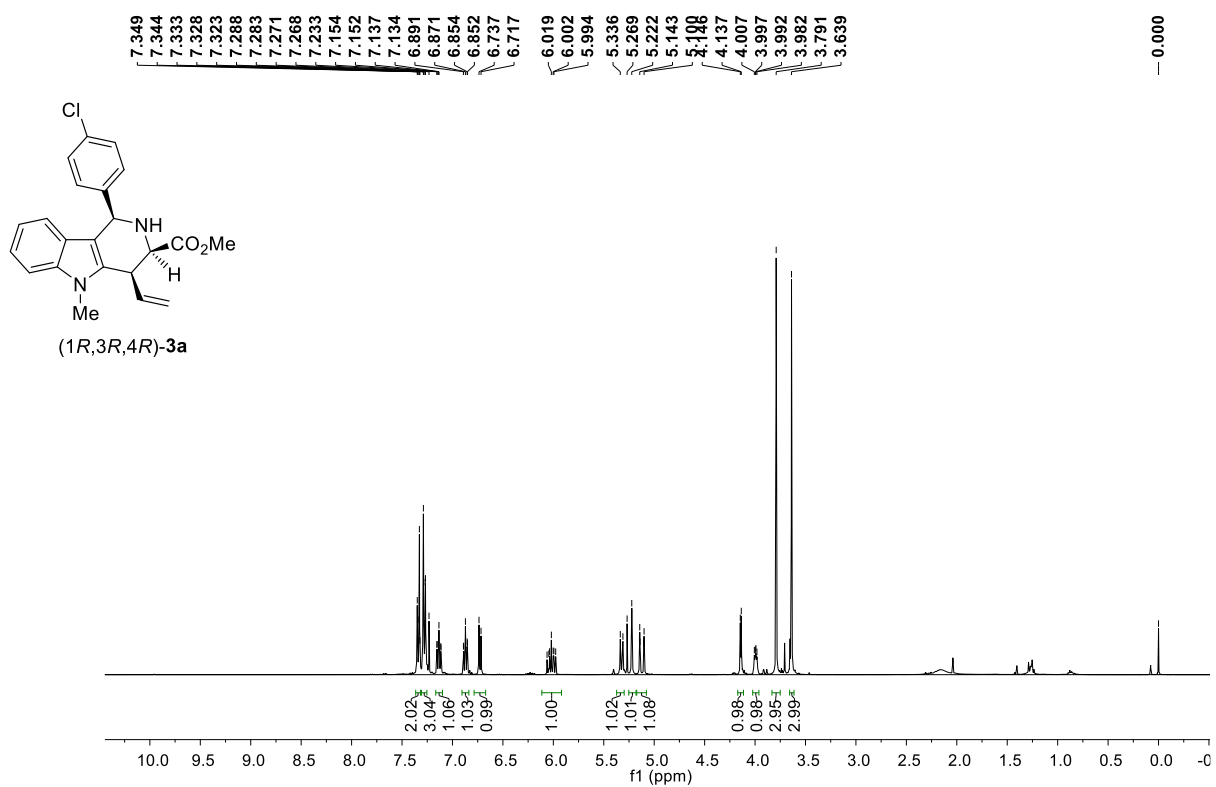

Supplementary Figure 29. <sup>1</sup>H NMR spectrum of (1*R*,3*R*,4*R*)-**3a**

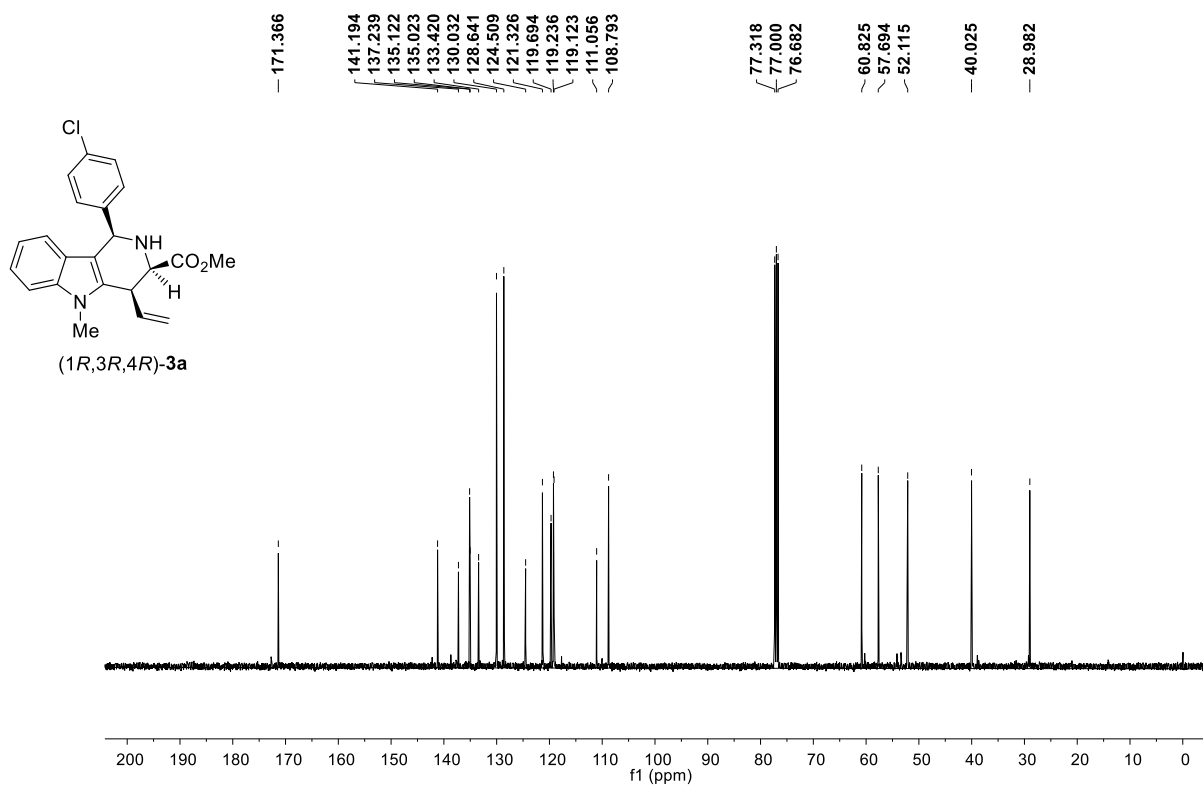

Supplementary Figure 30. <sup>13</sup>C NMR spectrum of (1*R*,3*R*,4*R*)-**3a**

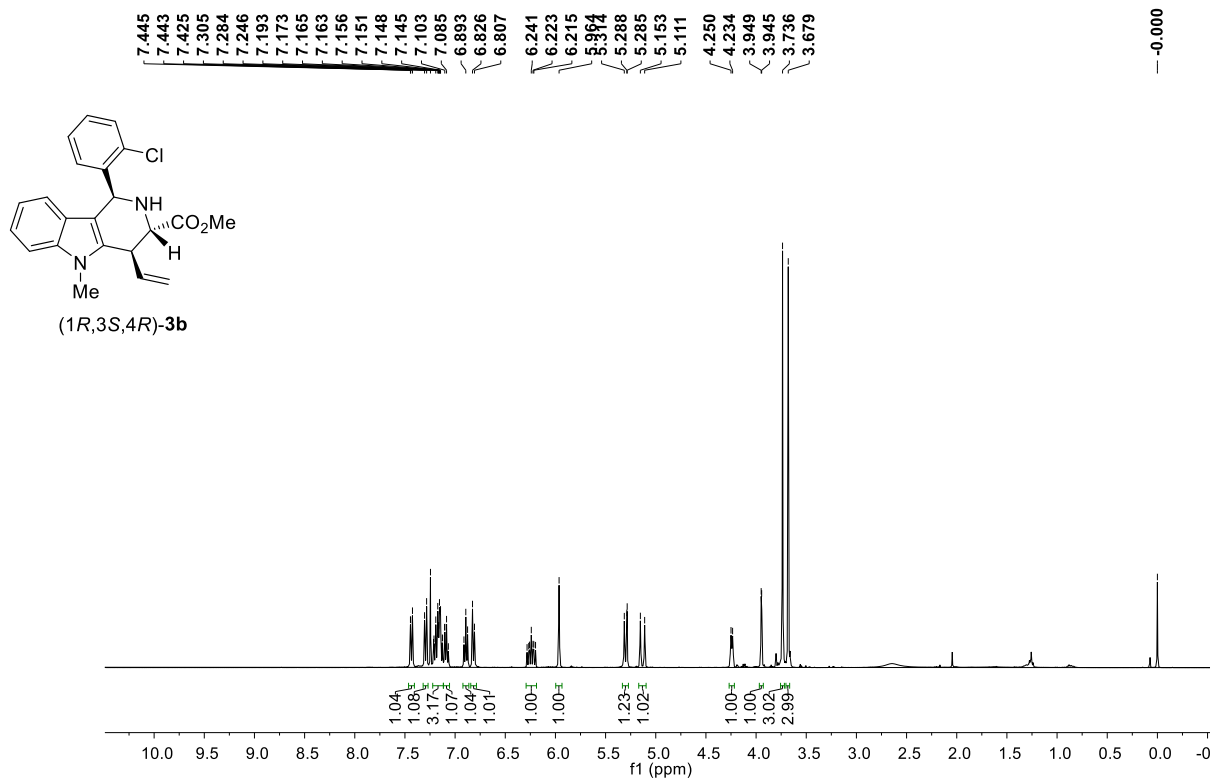

Supplementary Figure 31. <sup>1</sup>H NMR spectrum of (1*R*,3*S*,4*R*)-**3b**

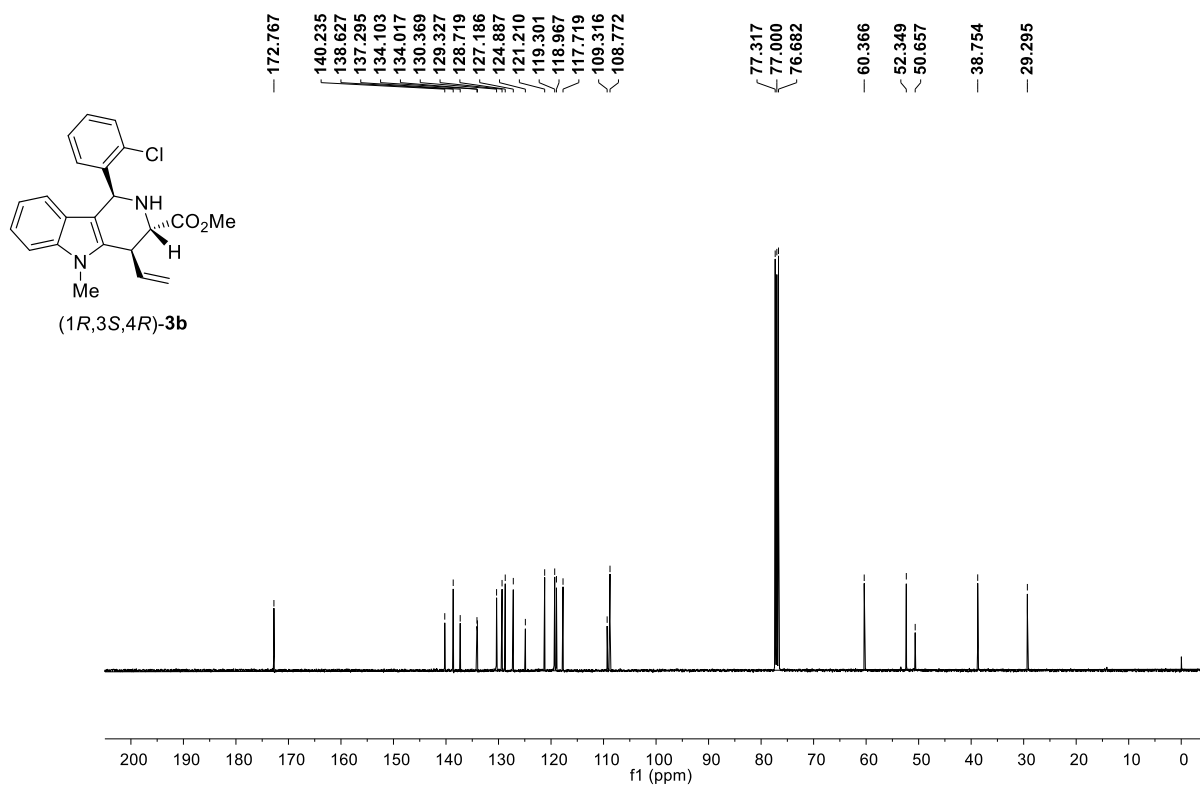

Supplementary Figure 32. <sup>13</sup>C NMR spectrum of (1*R*,3*S*,4*R*)-**3b**

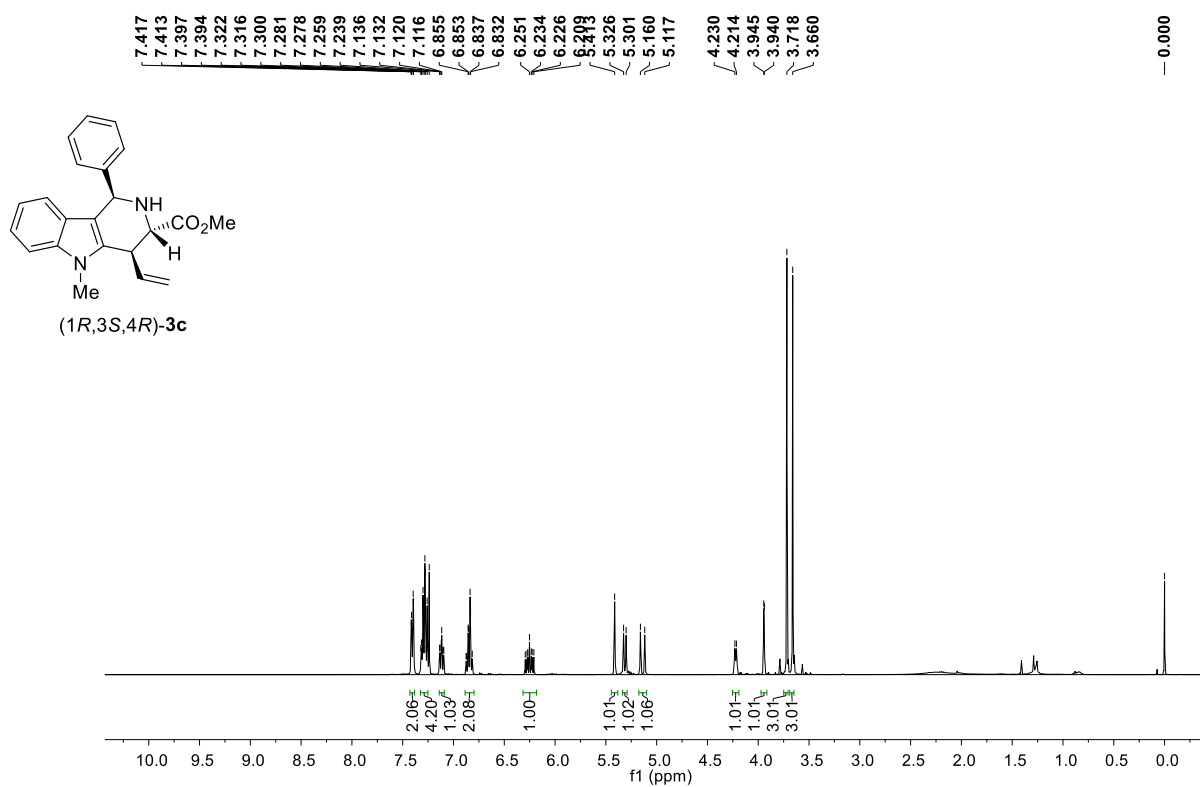

Supplementary Figure 33. <sup>1</sup>H NMR spectrum of (1*R*,3*S*,4*R*)-**3c**

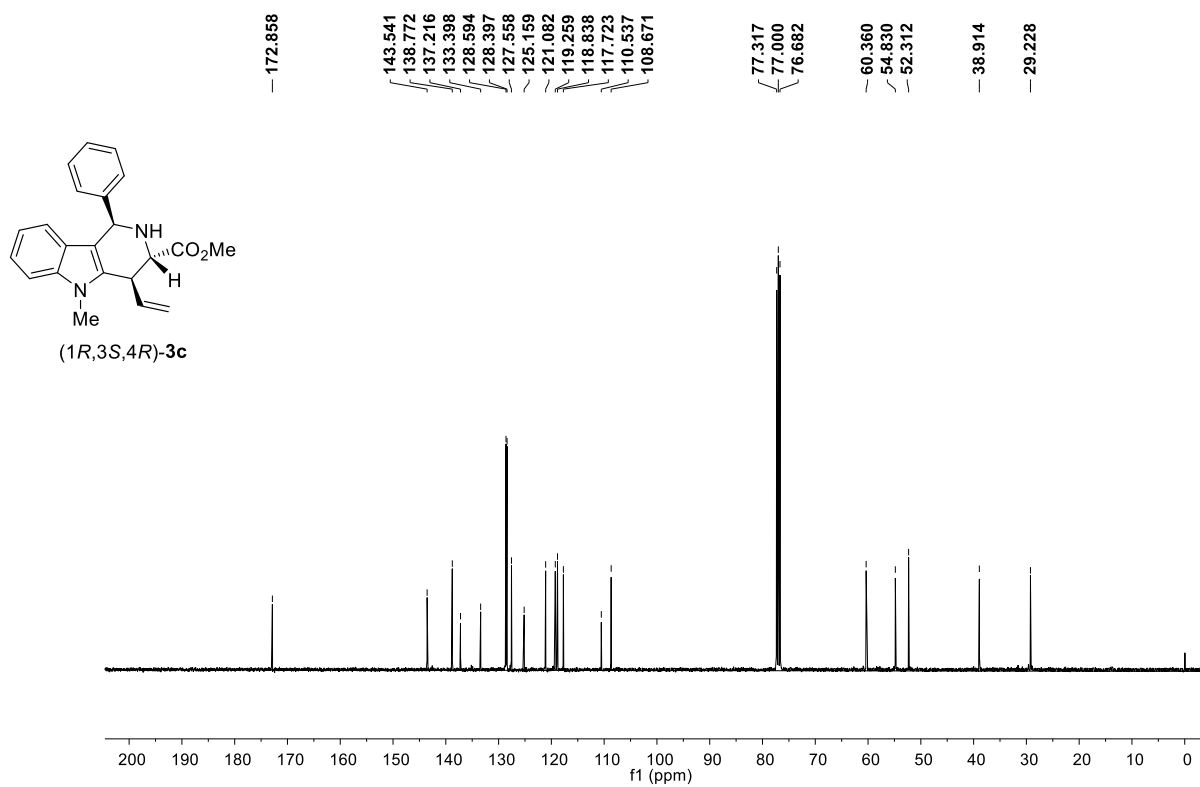

Supplementary Figure 34. <sup>13</sup>C NMR spectrum of (1*R*,3*S*,4*R*)-**3c**

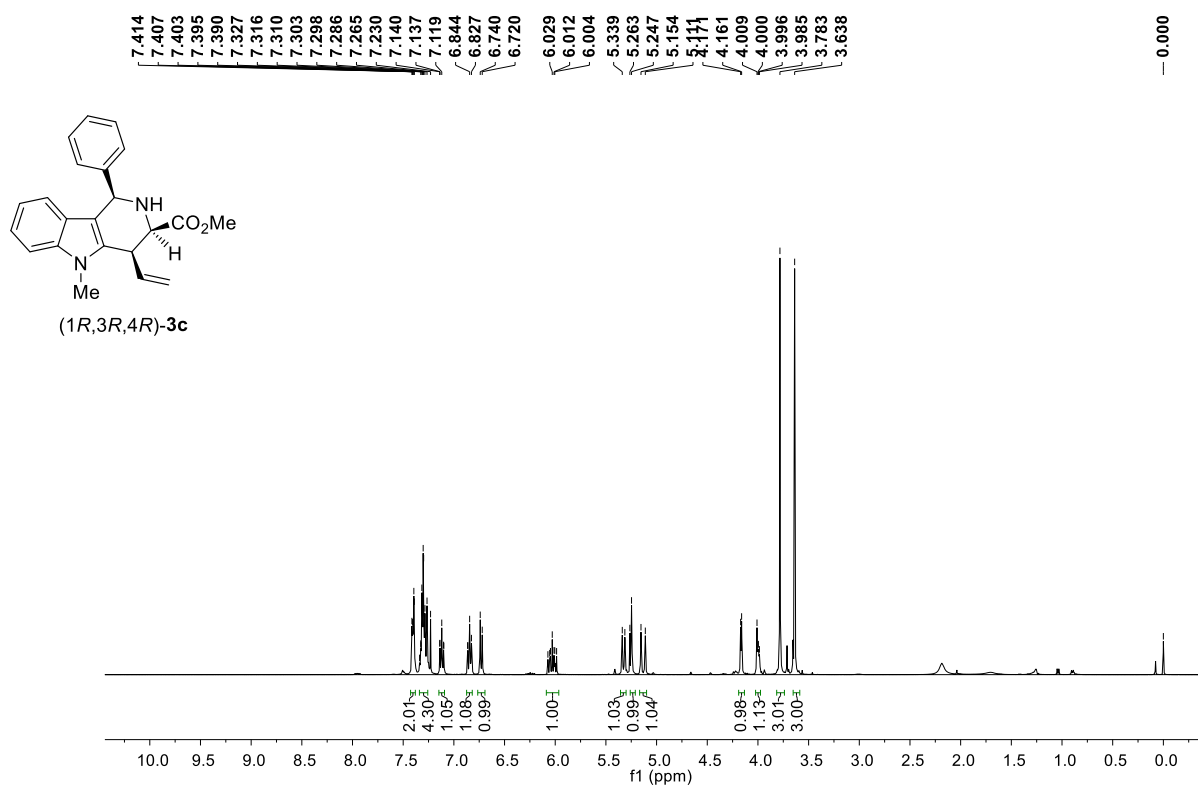

Supplementary Figure 35. <sup>1</sup>H NMR spectrum of (1*R*,3*R*,4*R*)-**3c**

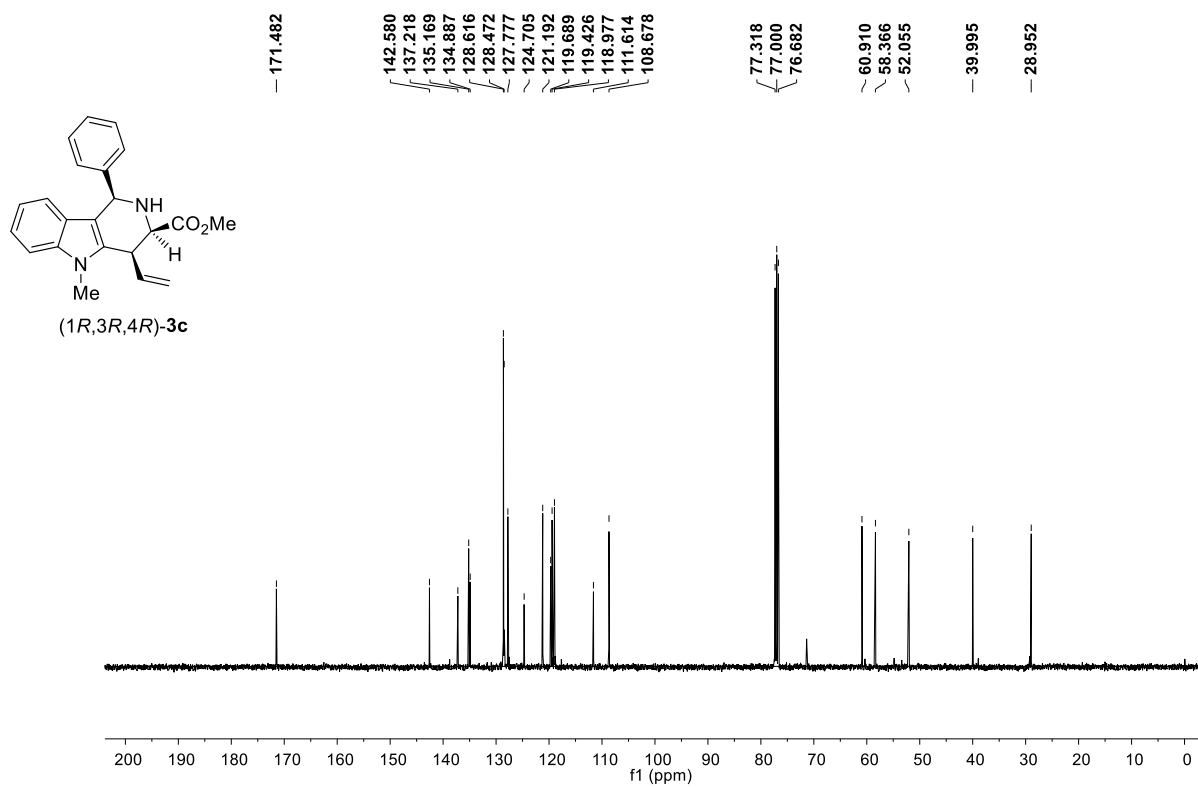

Supplementary Figure 36. <sup>13</sup>C NMR spectrum of (1*R*,3*R*,4*R*)-**3c**

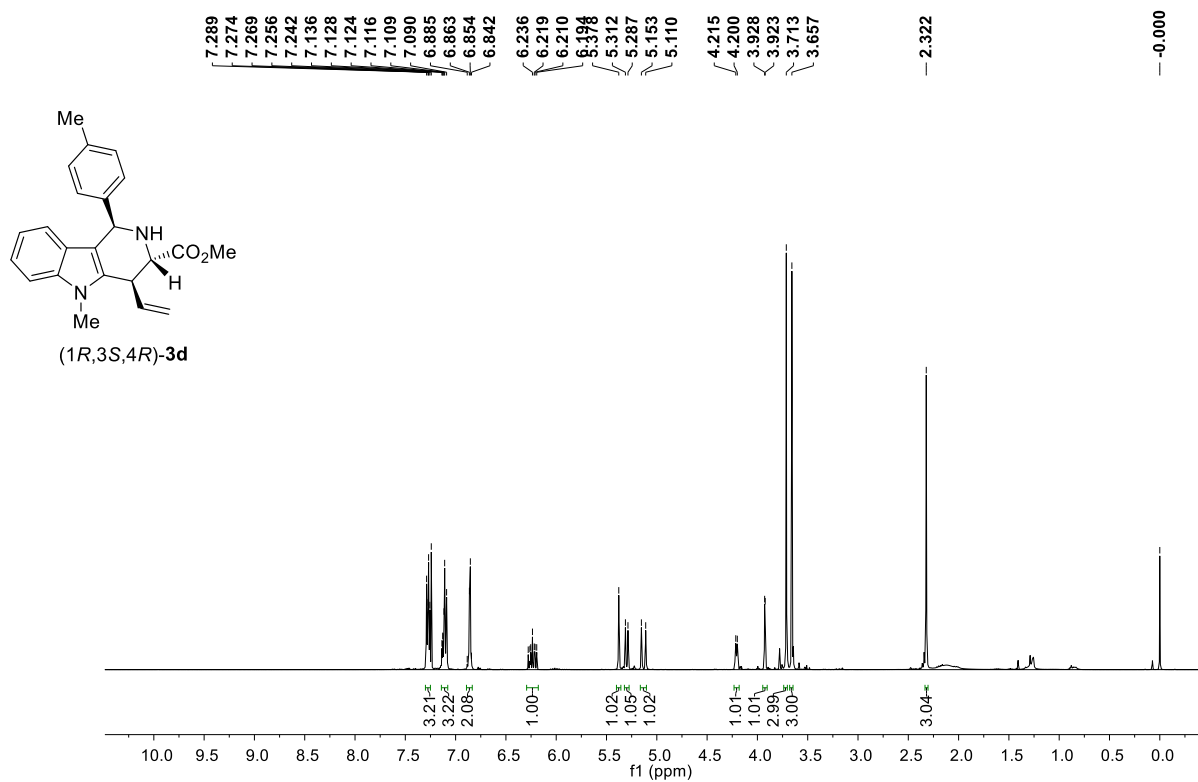

Supplementary Figure 37. <sup>1</sup>H NMR spectrum of (1*R*,3*S*,4*R*)-**3d**

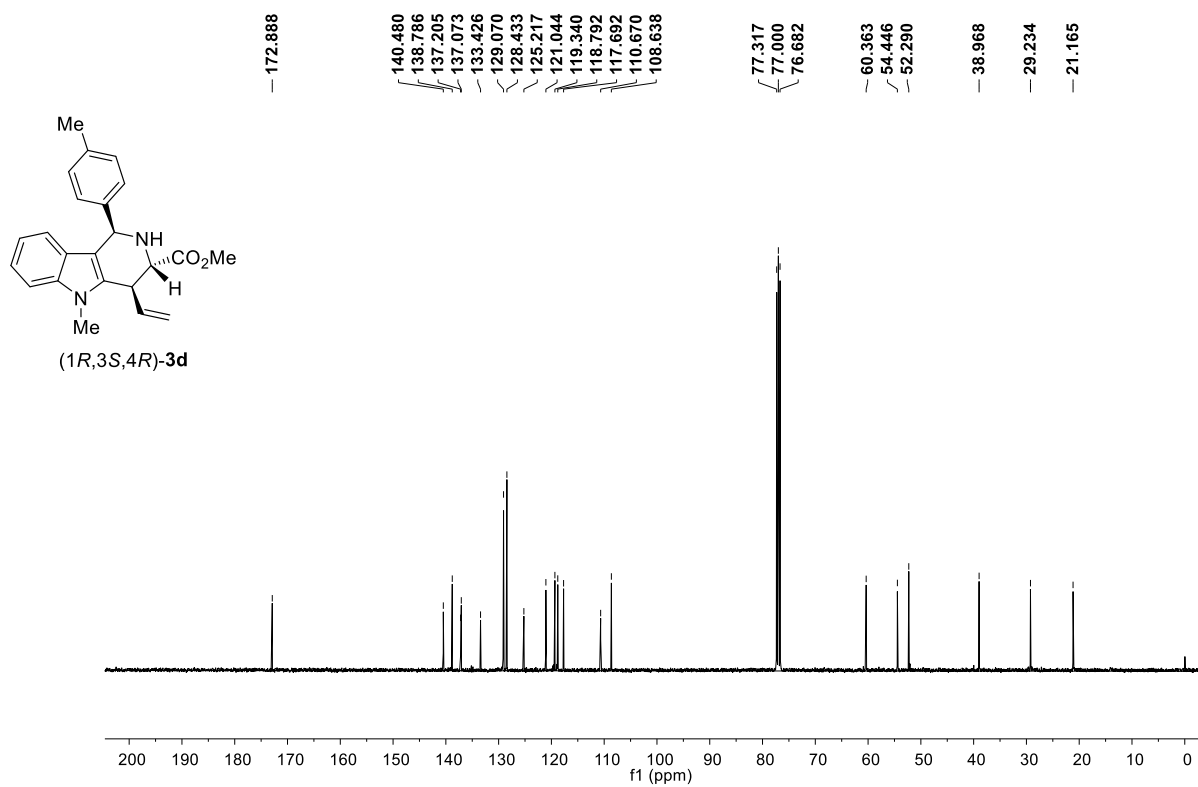

Supplementary Figure 38. <sup>13</sup>C NMR spectrum of (1*R*,3*S*,4*R*)-**3d**

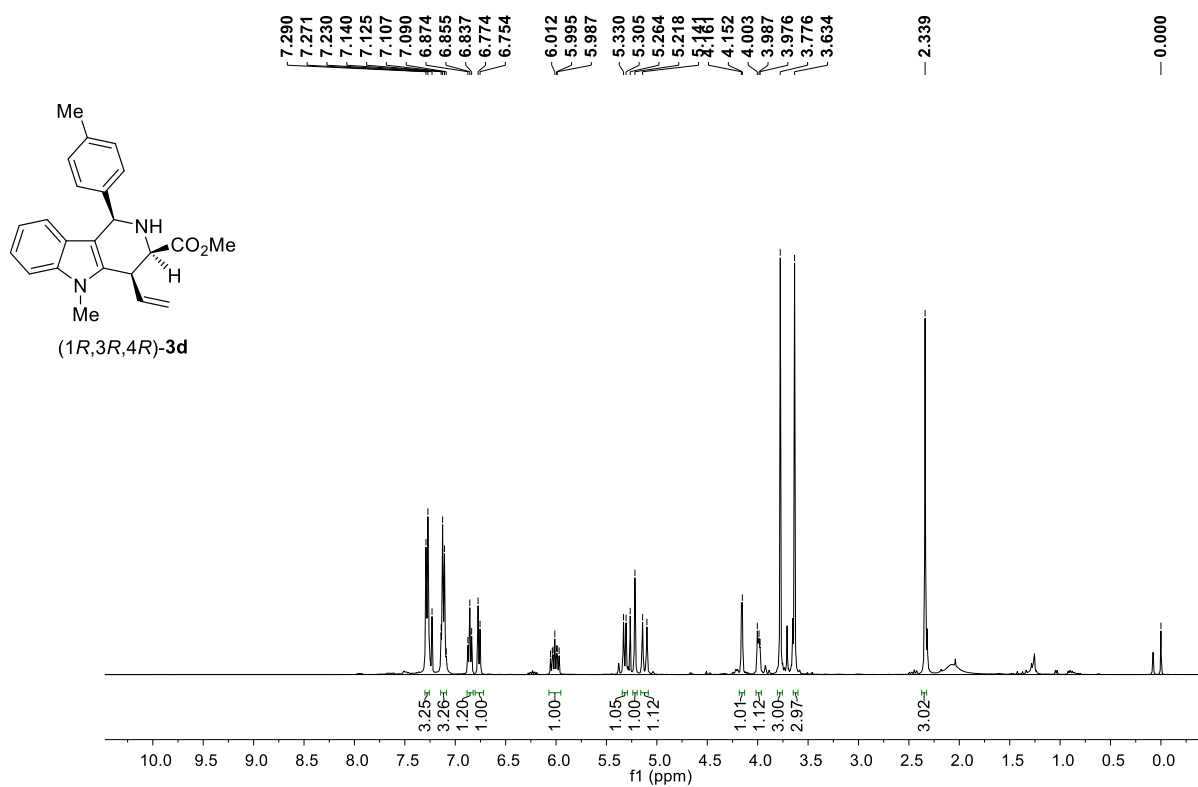

Supplementary Figure 39. <sup>1</sup>H NMR spectrum of (1*R*,3*R*,4*R*)-**3d**

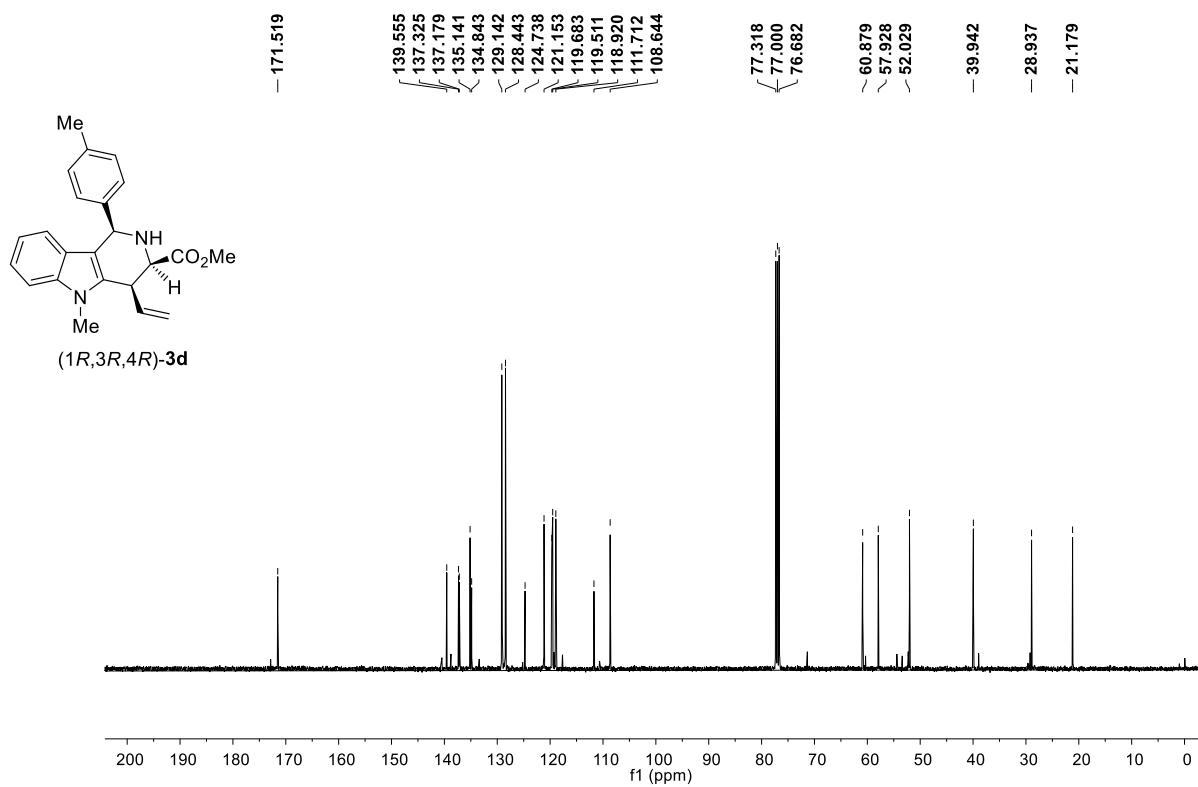

Supplementary Figure 40. <sup>13</sup>C NMR spectrum of (1*R*,3*R*,4*R*)-**3d**

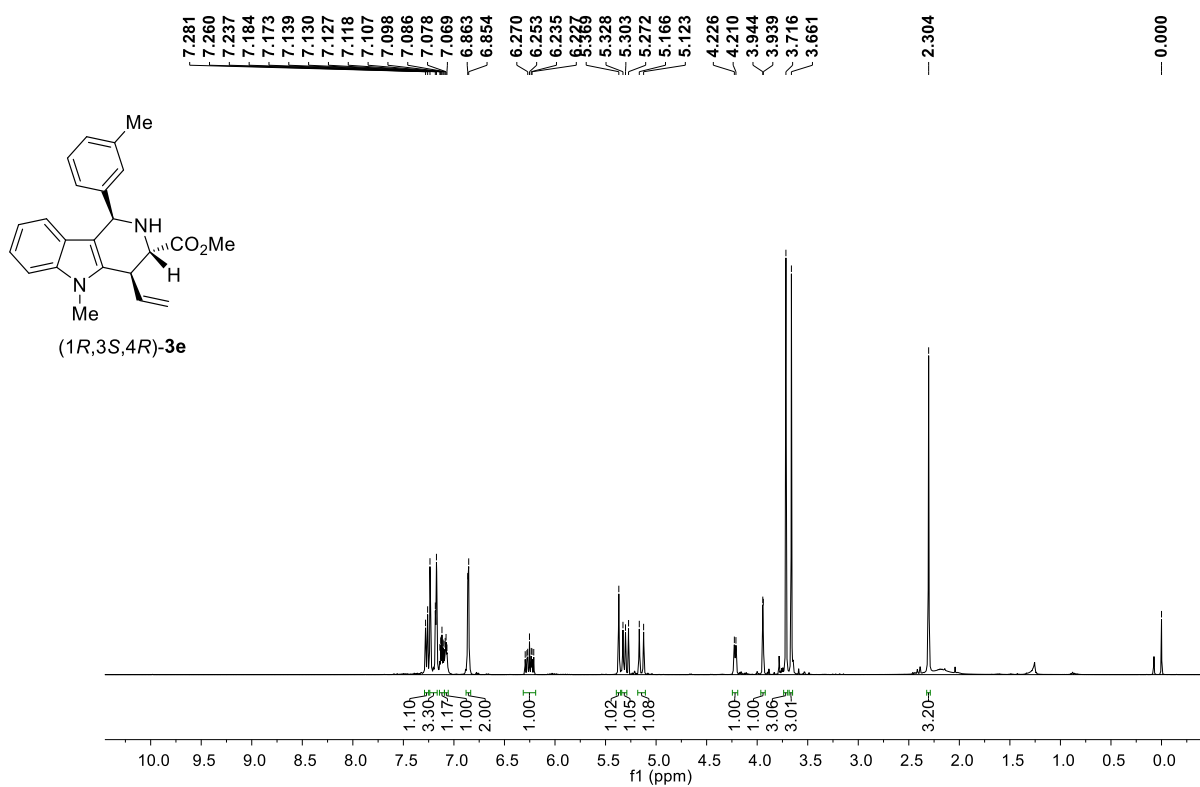

Supplementary Figure 41. <sup>1</sup>H NMR spectrum of (1*R*,3*S*,4*R*)-**3e**

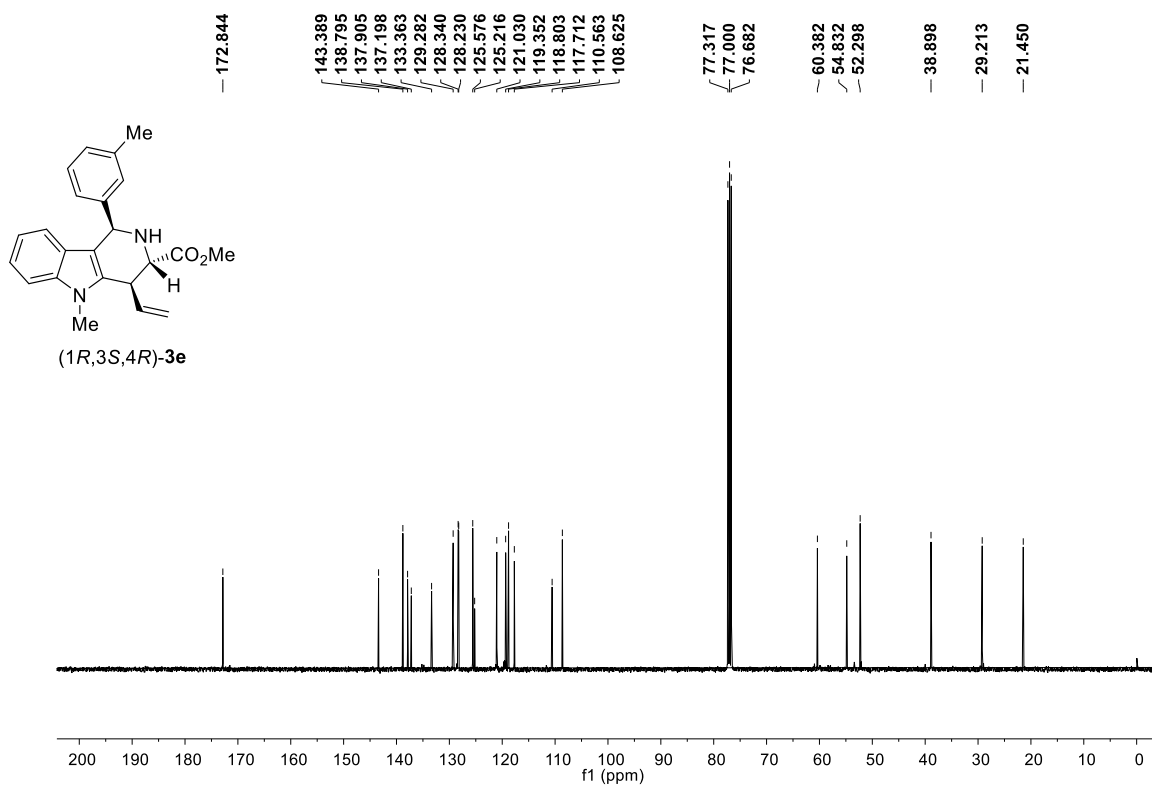

Supplementary Figure 42. <sup>13</sup>C NMR spectrum of (1*R*,3*S*,4*R*)-**3e**

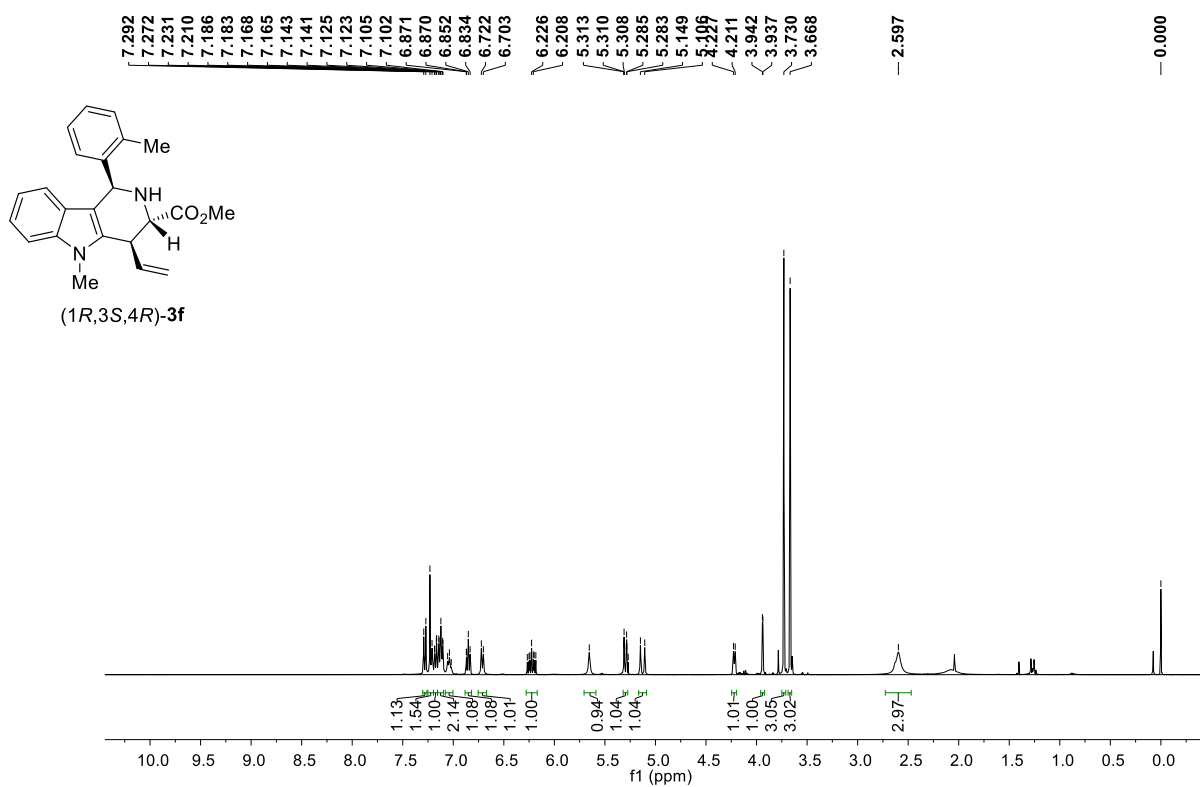

Supplementary Figure 43. <sup>1</sup>H NMR spectrum of (1*R*,3*S*,4*R*)-**3f**

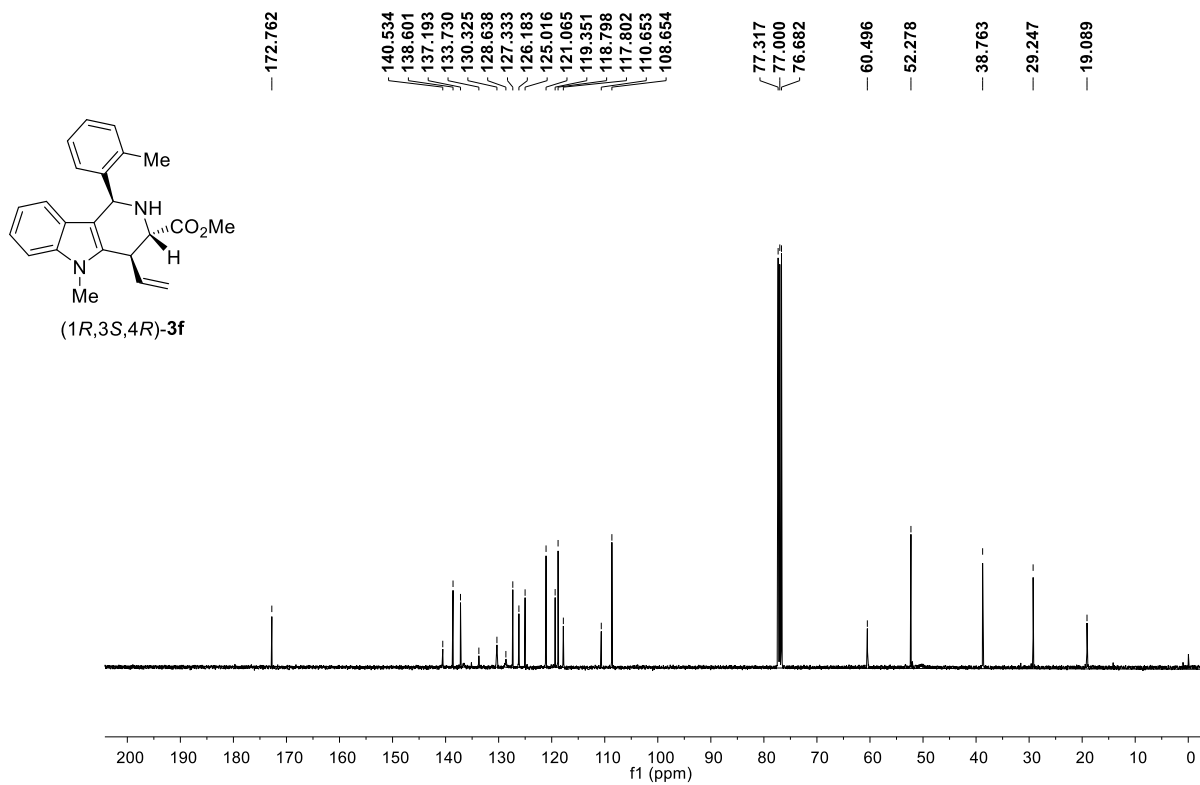

Supplementary Figure 44. <sup>13</sup>C NMR spectrum of (1*R*,3*S*,4*R*)-**3f**

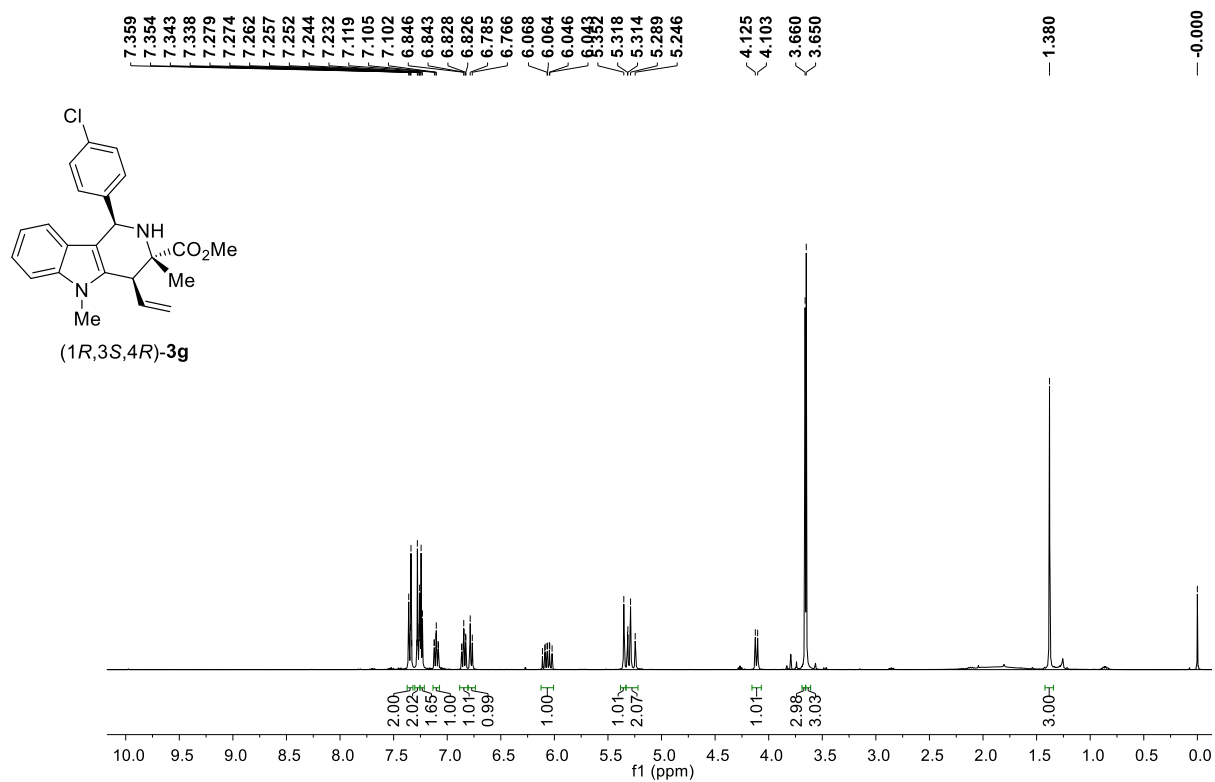

Supplementary Figure 45. <sup>1</sup>H NMR spectrum of (1*R*,3*S*,4*R*)-**3g**

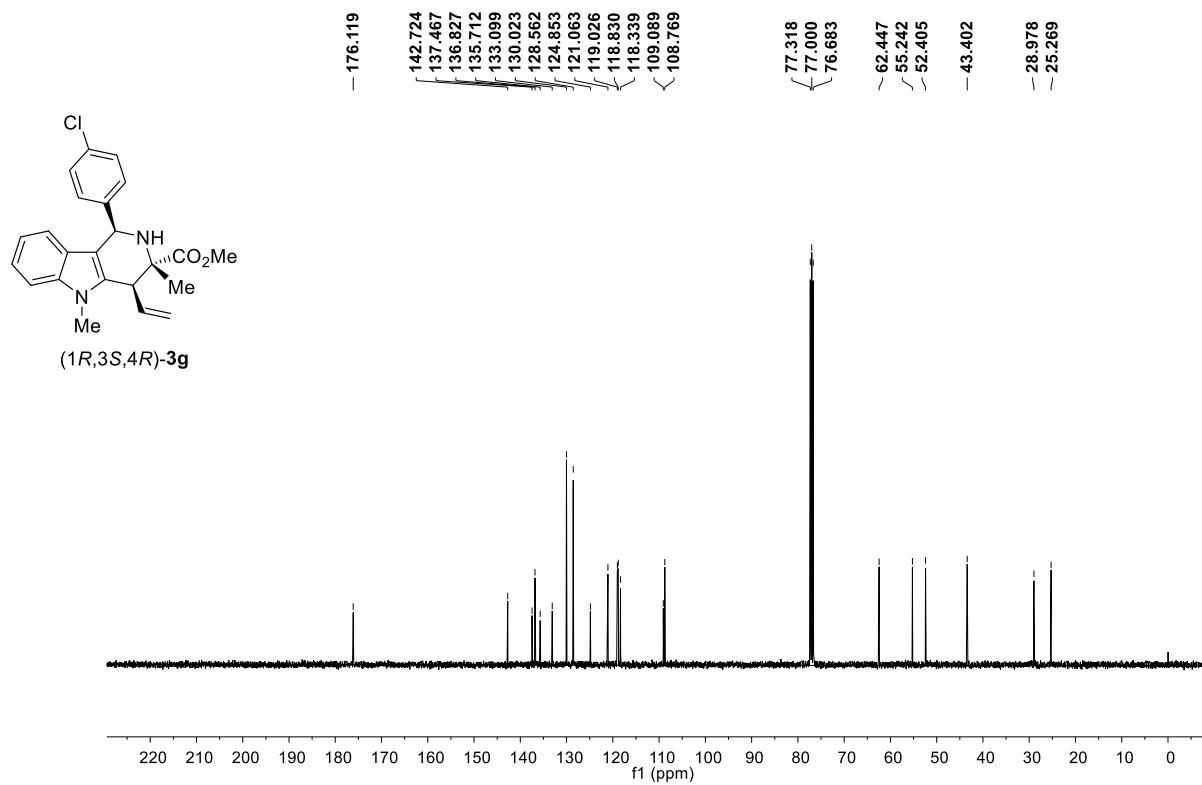

Supplementary Figure 46. <sup>13</sup>C NMR spectrum of (1*R*,3*S*,4*R*)-**3g**

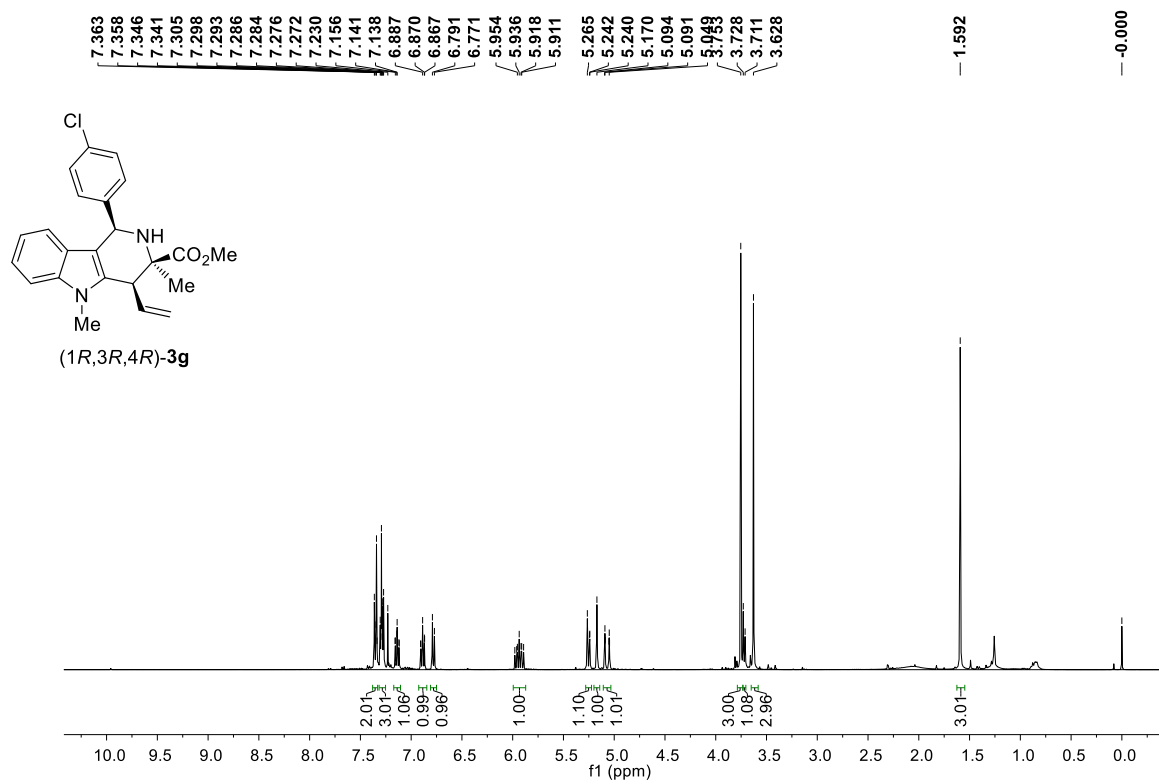

Supplementary Figure 47. <sup>1</sup>H NMR spectrum of (1*R*,3*R*,4*R*)-**3g**

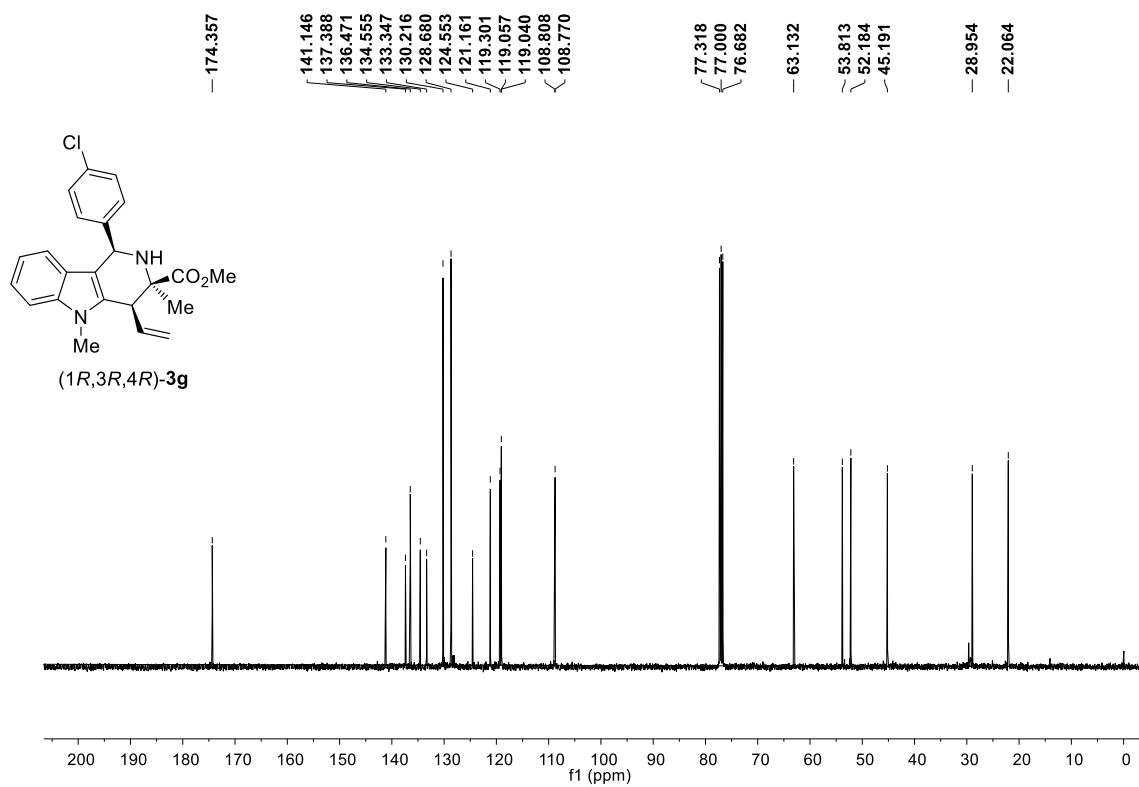

Supplementary Figure 48. <sup>13</sup>C NMR spectrum of (1*R*,3*R*,4*R*)-**3g**

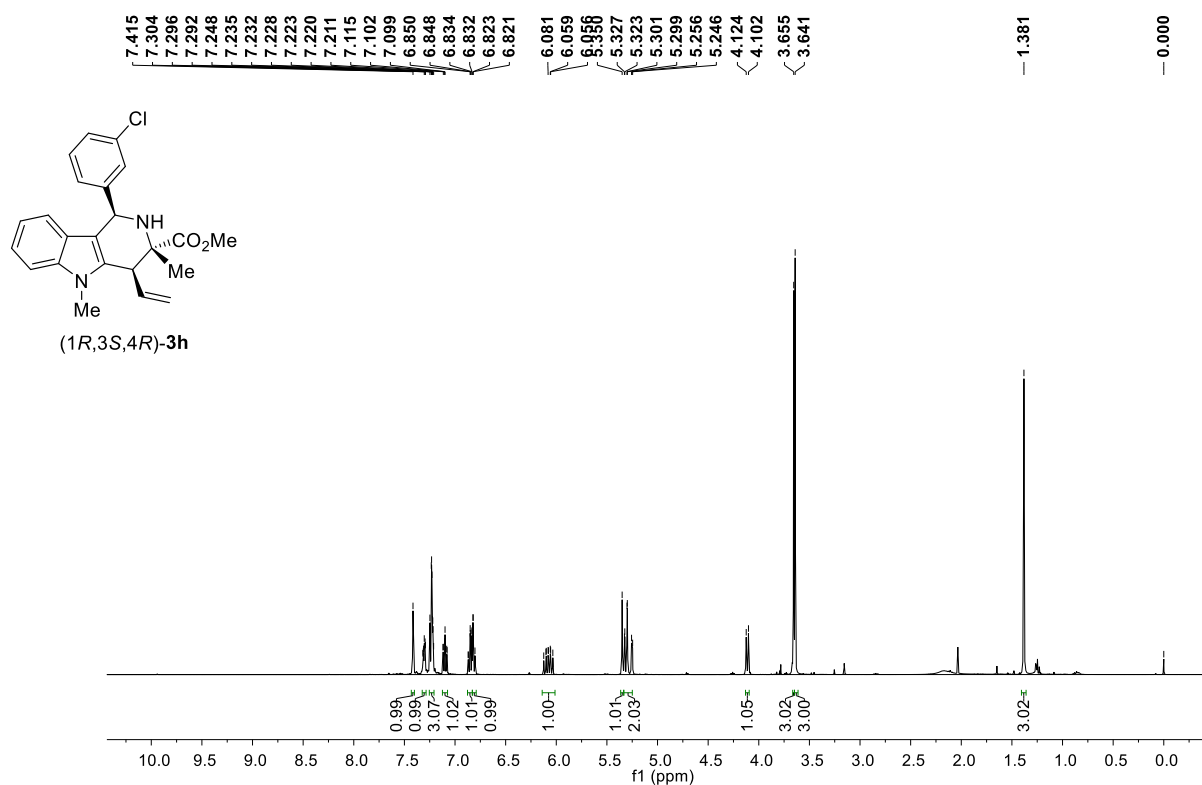

**Supplementary Figure 49.** <sup>1</sup>H NMR spectrum of (1*R*,3*S*,4*R*)-3h

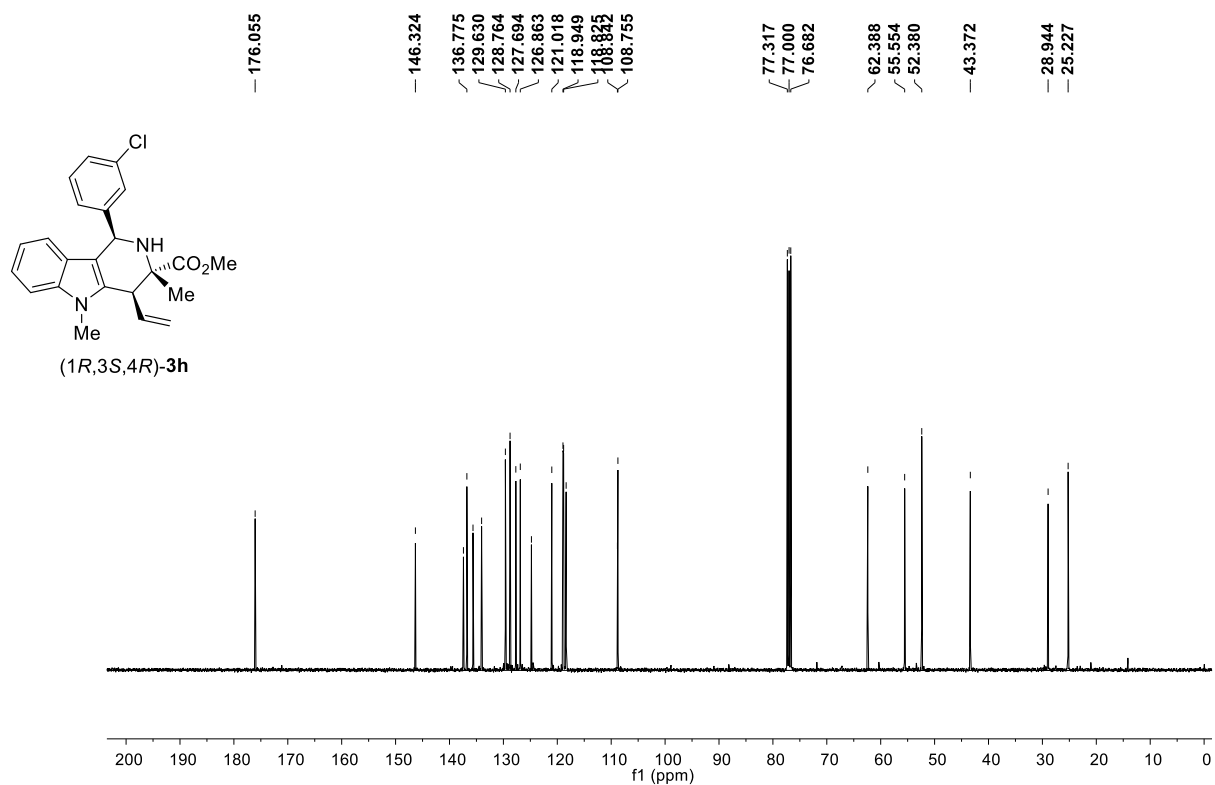

**Supplementary Figure 50.** <sup>13</sup>C NMR spectrum of (1*R*,3*S*,4*R*)-3h

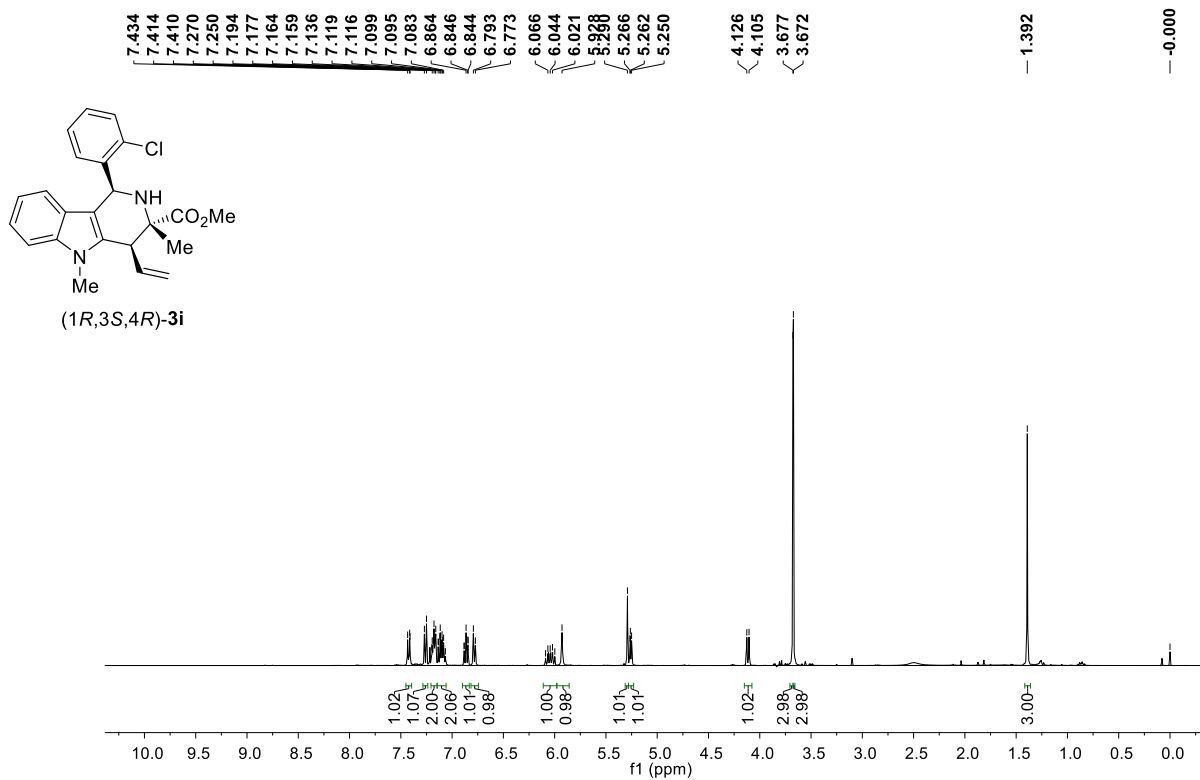

Supplementary Figure 51. <sup>1</sup>H NMR spectrum of (1*R*,3*S*,4*R*)-**3i**

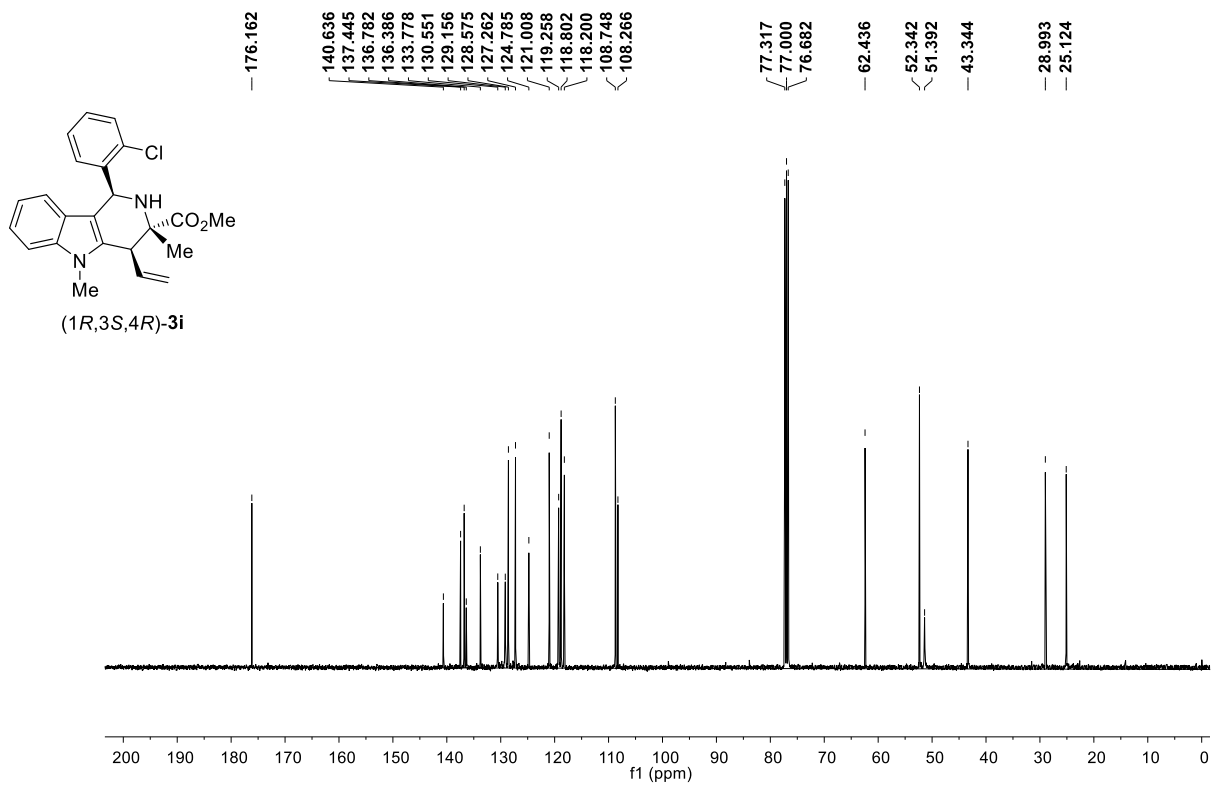

Supplementary Figure 52. <sup>13</sup>C NMR spectrum of (1*R*,3*S*,4*R*)-**3i**

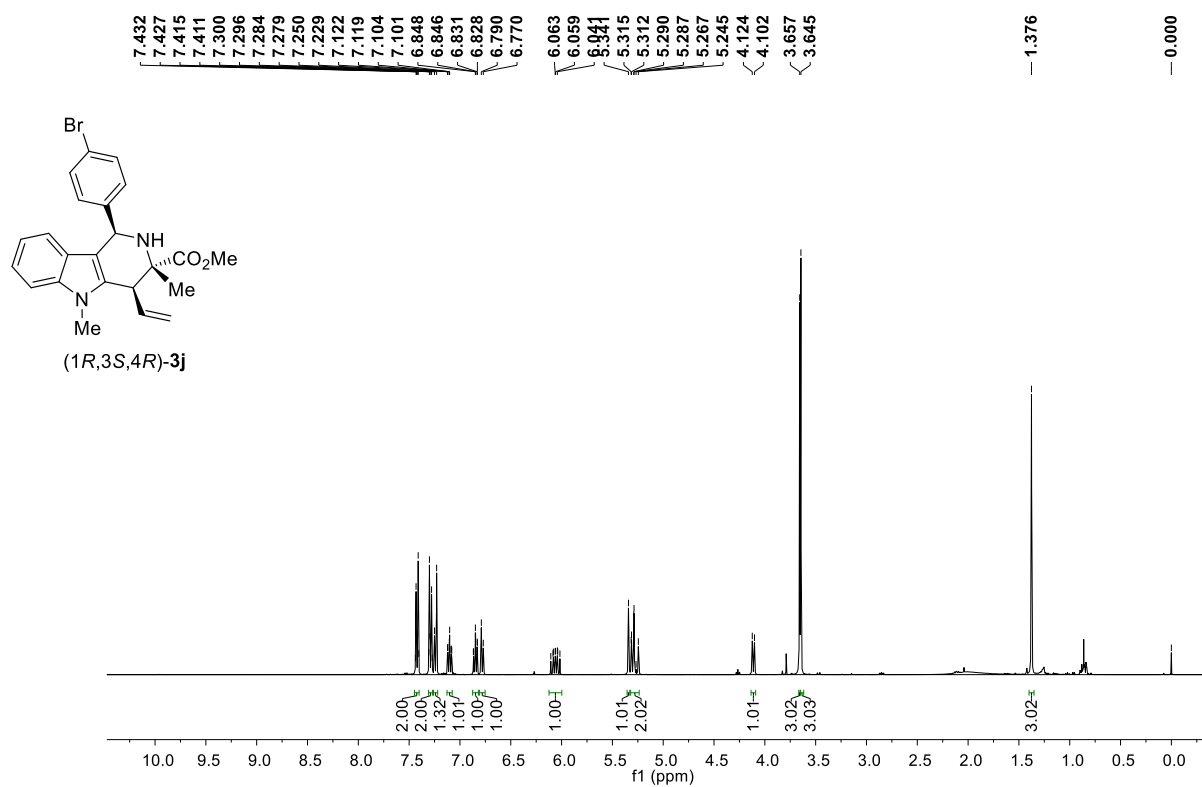

Supplementary Figure 53. <sup>1</sup>H NMR spectrum of (1*R*,3*S*,4*R*)-**3j**

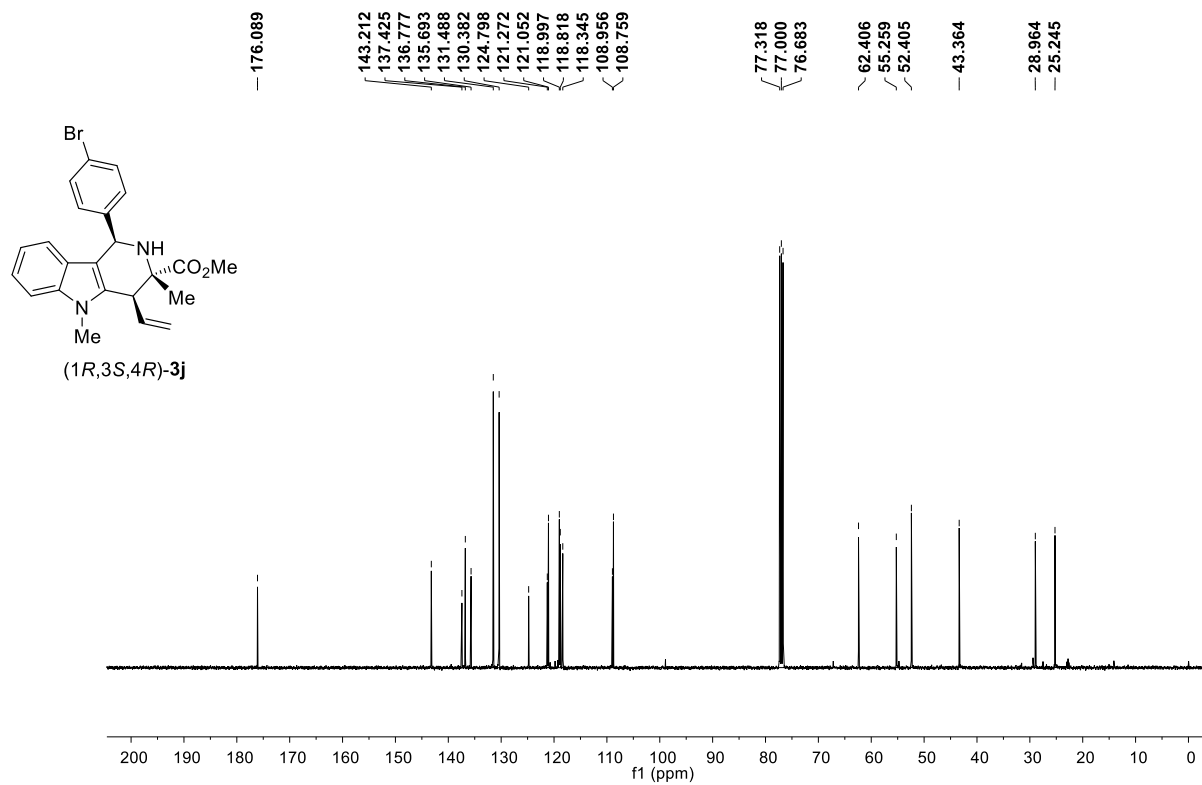

Supplementary Figure 54. <sup>13</sup>C NMR spectrum of (1*R*,3*S*,4*R*)-**3j**

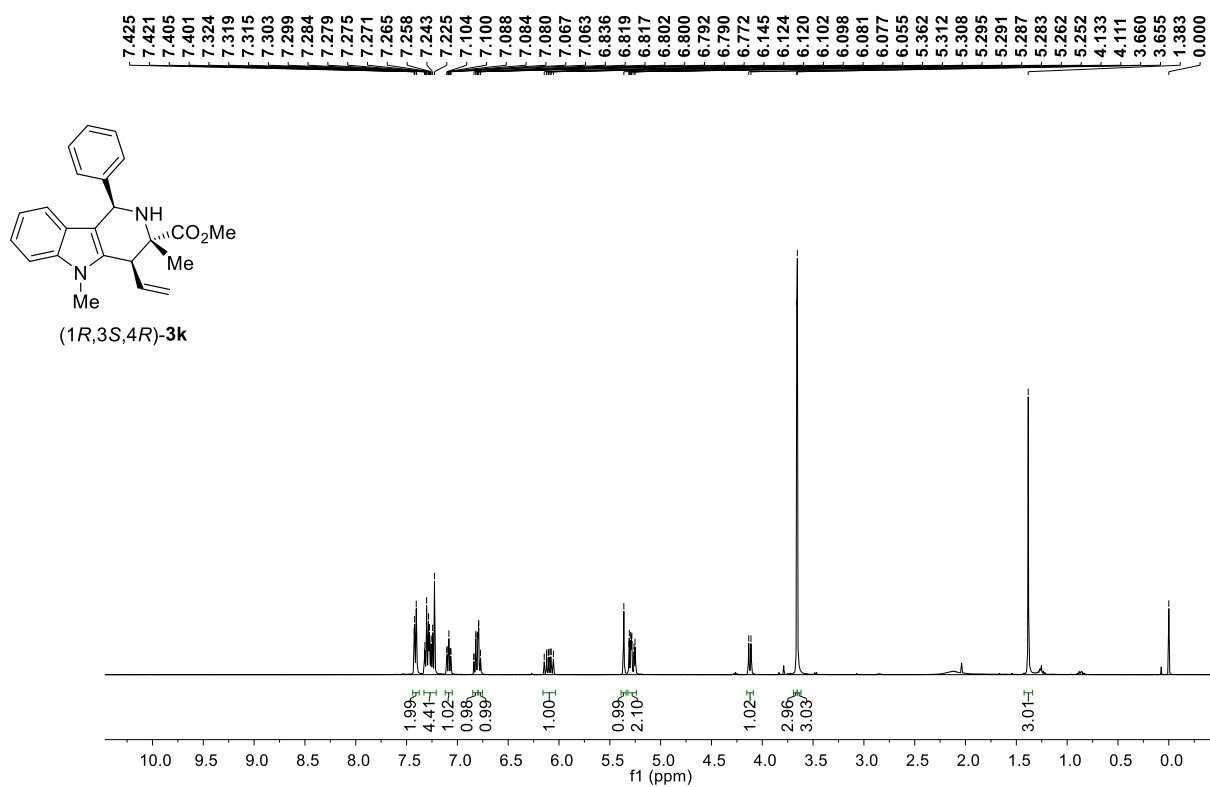

Supplementary Figure 55. <sup>1</sup>H NMR spectrum of (1*R*,3*S*,4*R*)-**3k**

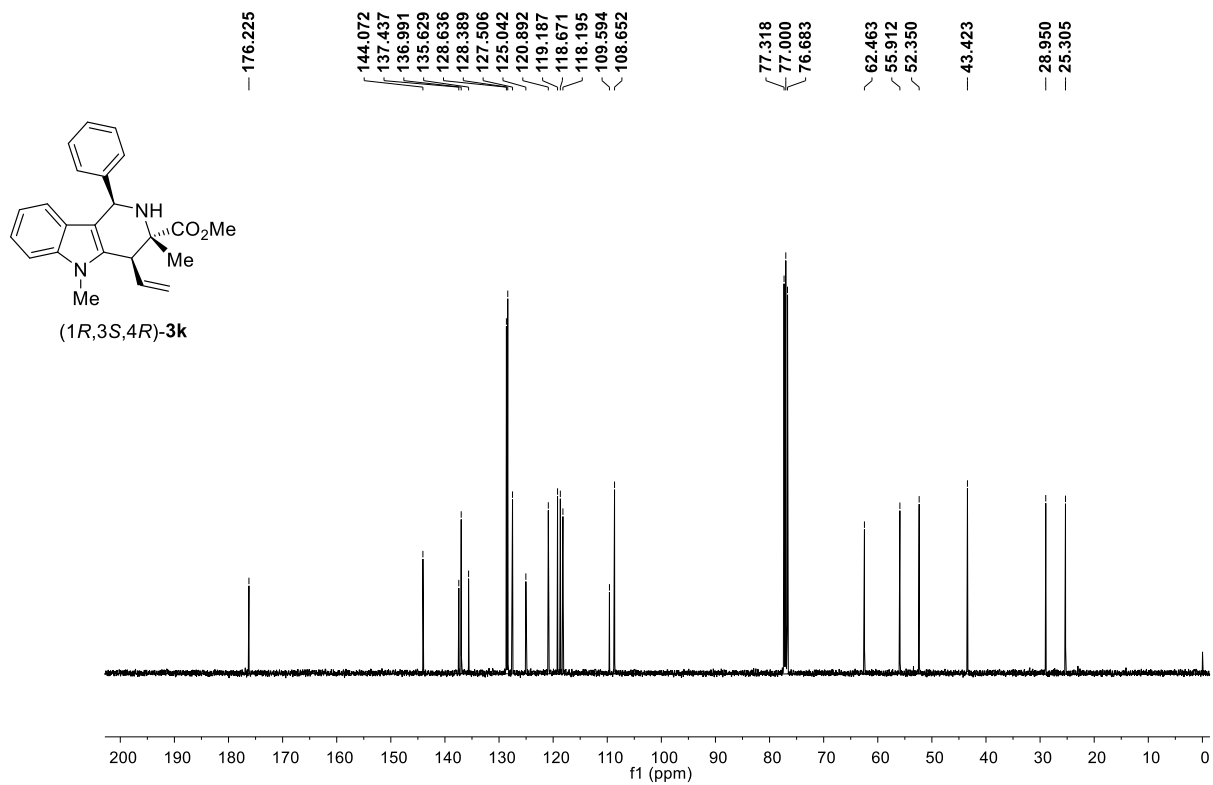

Supplementary Figure 56. <sup>13</sup>C NMR spectrum of (1*R*,3*S*,4*R*)-**3k**

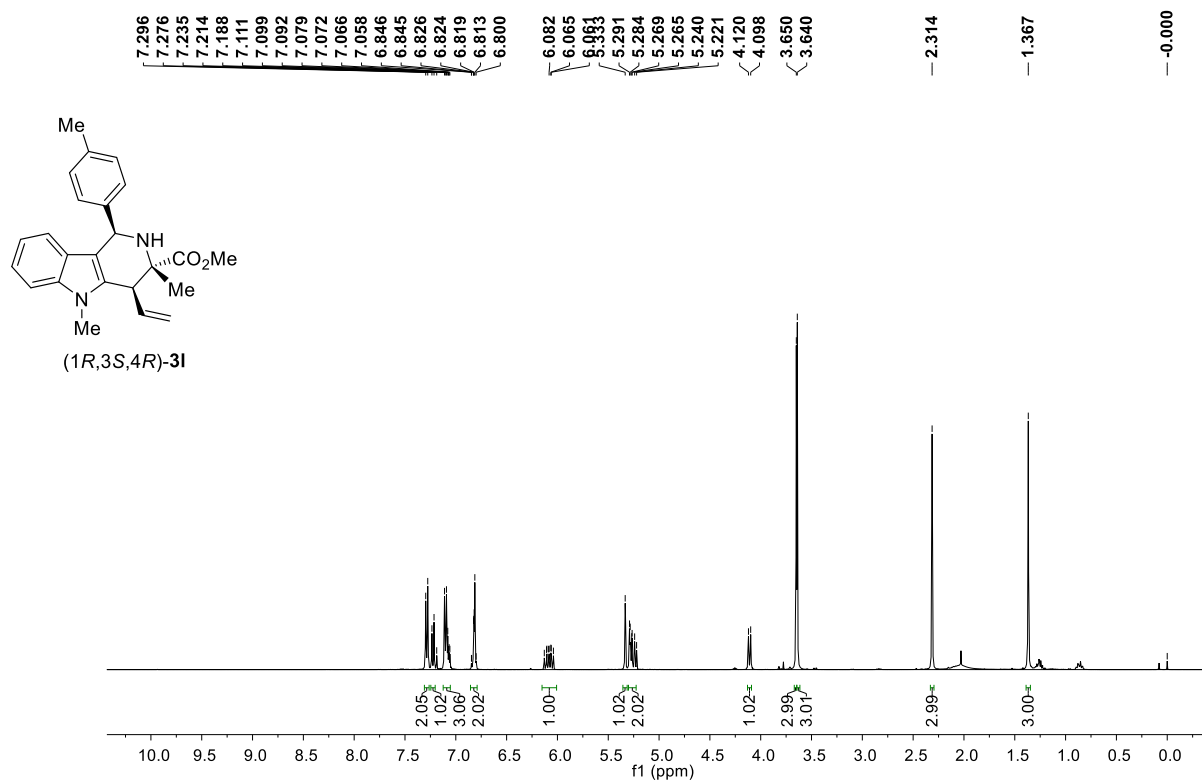

Supplementary Figure 57. <sup>1</sup>H NMR spectrum of (1*R*,3*S*,4*R*)-**3I**

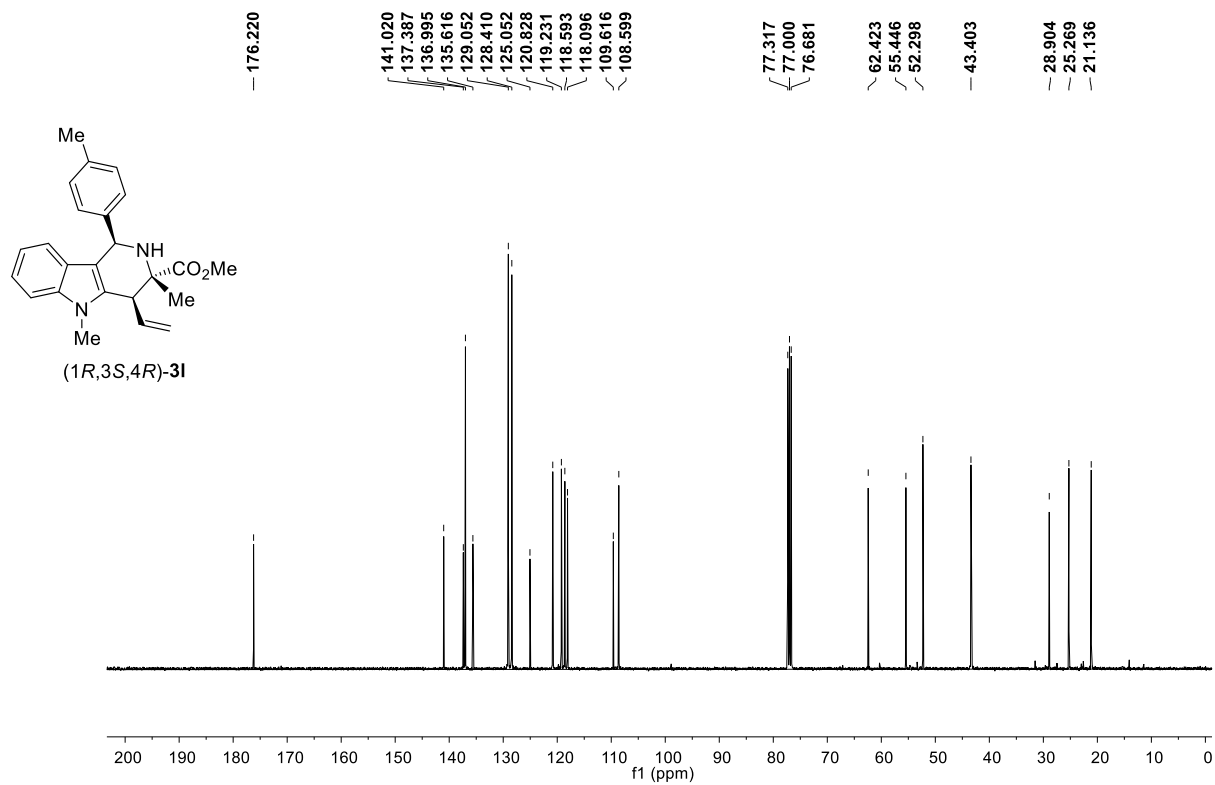

Supplementary Figure 58. <sup>13</sup>C NMR spectrum of (1*R*,3*S*,4*R*)-**3I**

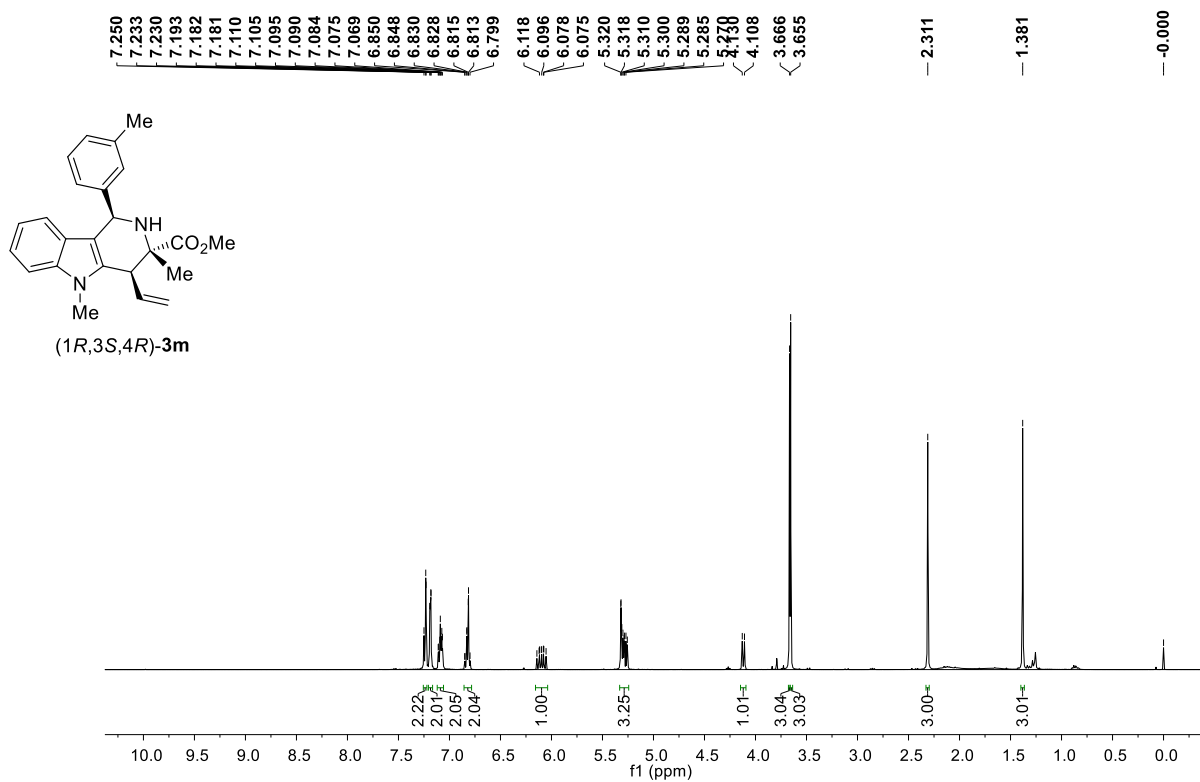

Supplementary Figure 59. <sup>1</sup>H NMR spectrum of (1*R*,3*S*,4*R*)-3m

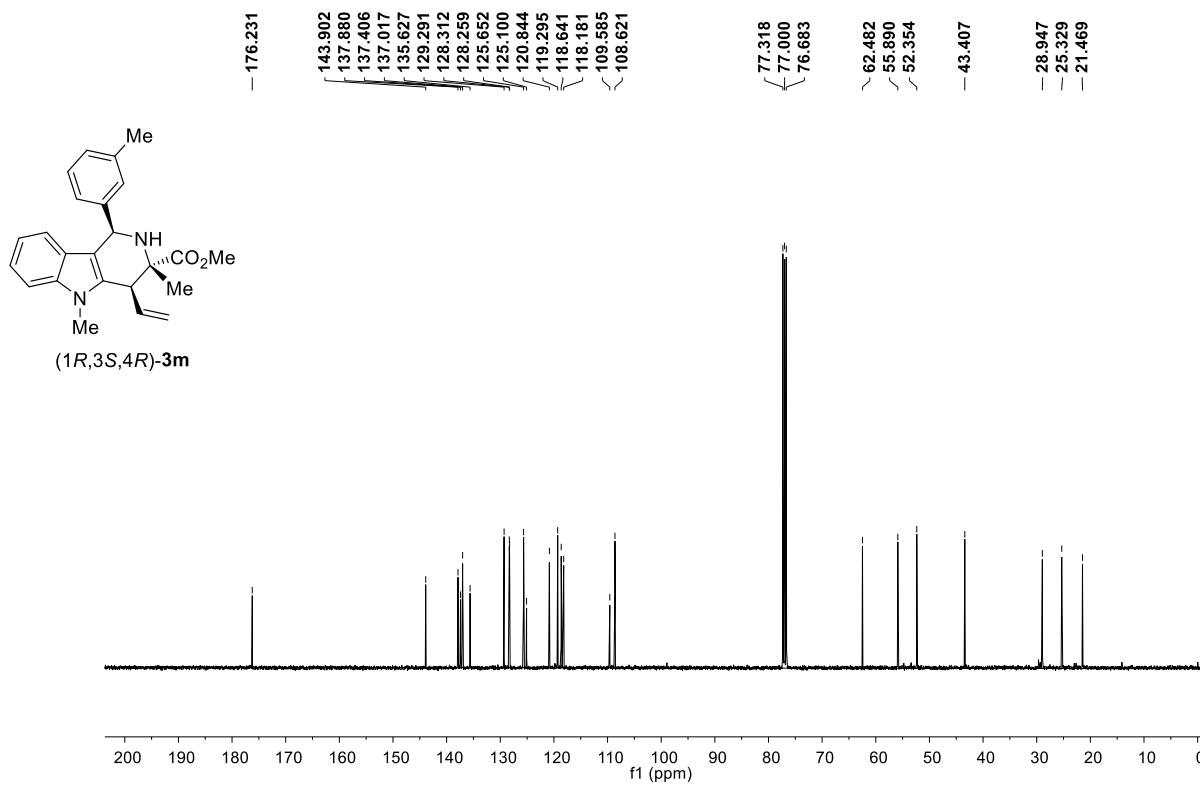

Supplementary Figure 60. <sup>13</sup>C NMR spectrum of (1*R*,3*S*,4*R*)-3m

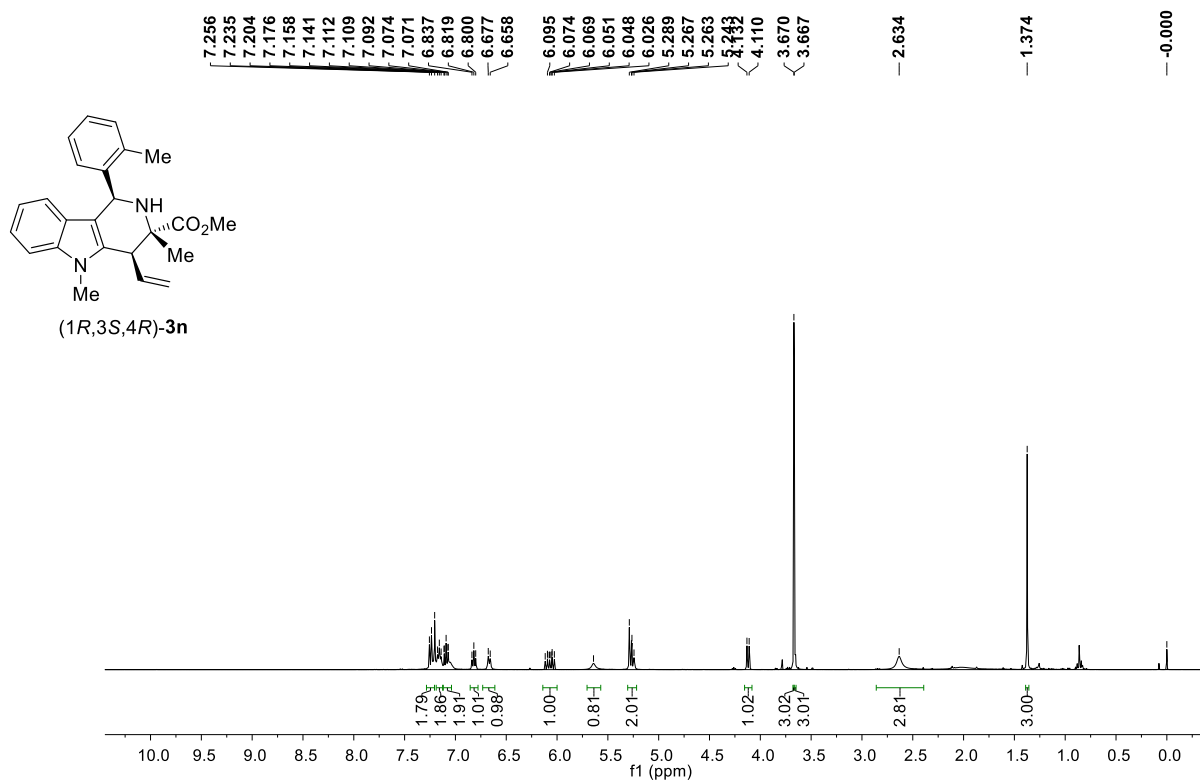

Supplementary Figure 61. <sup>1</sup>H NMR spectrum of (1*R*,3*S*,4*R*)-**3n**

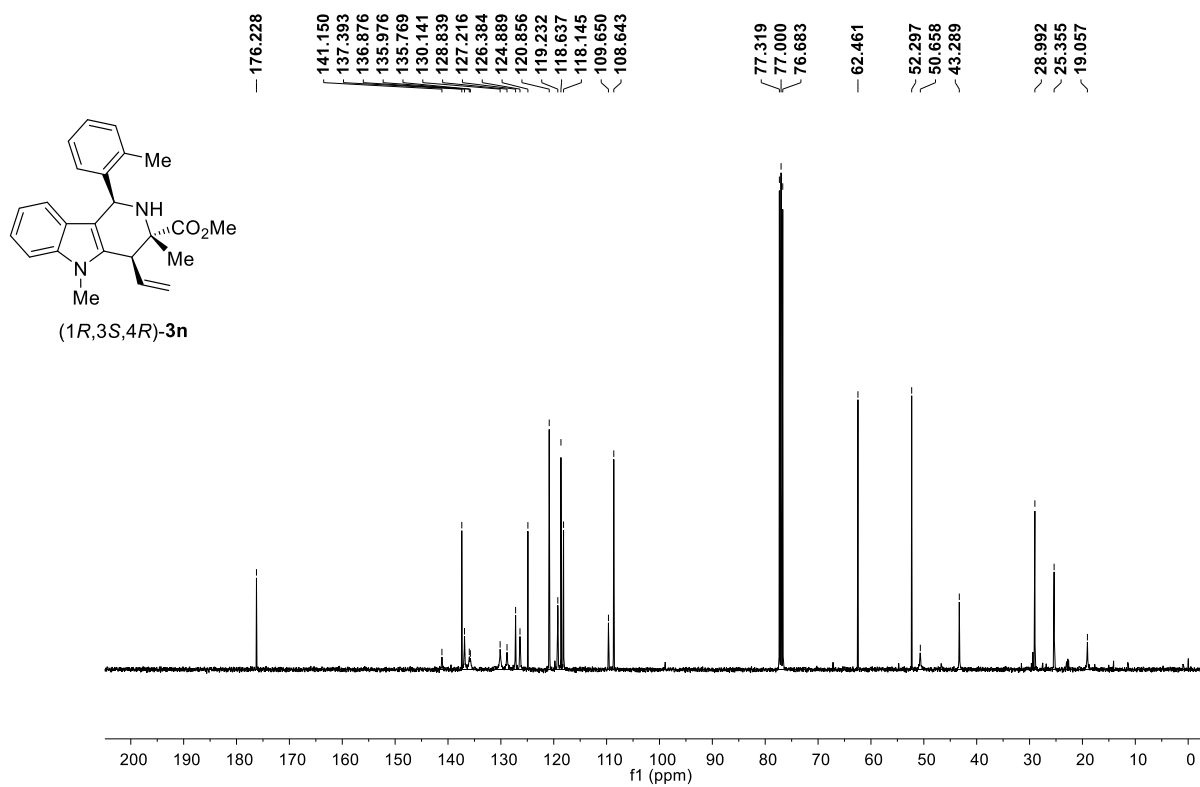

Supplementary Figure 62. <sup>13</sup>C NMR spectrum of (1*R*,3*S*,4*R*)-**3n**

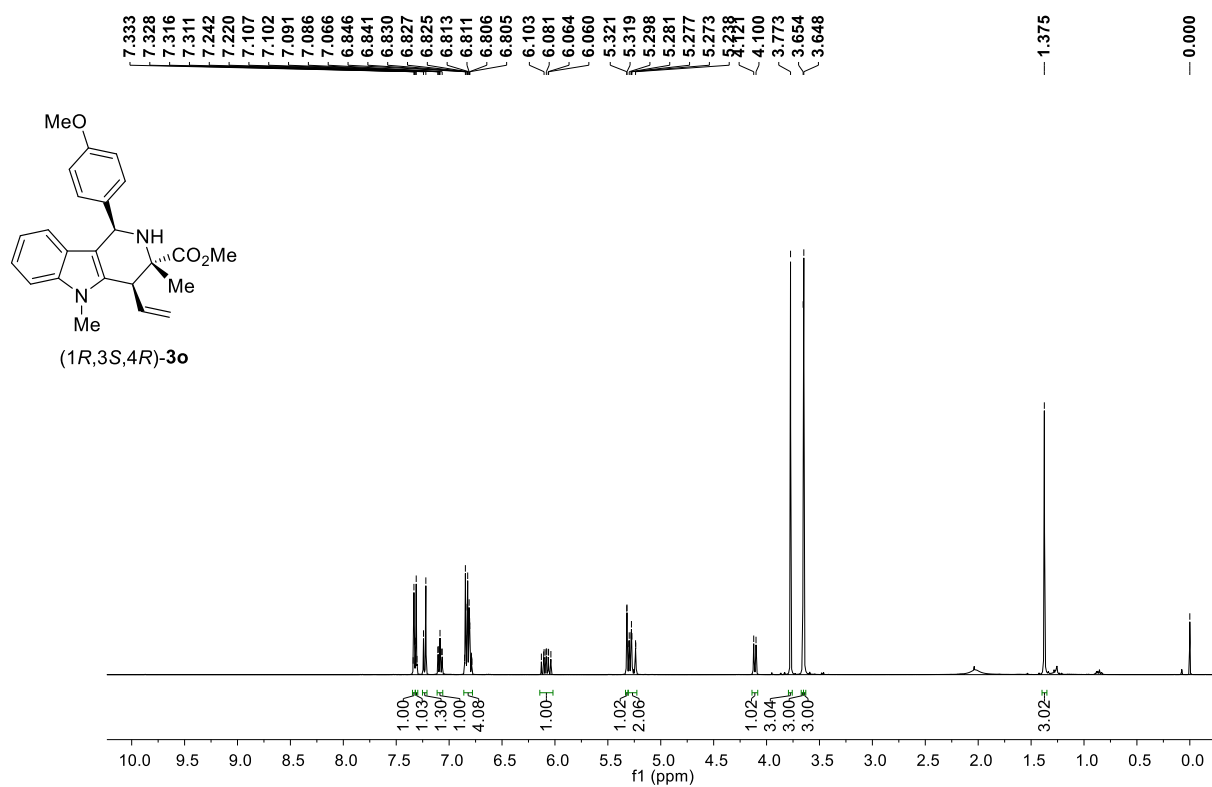

**Supplementary Figure 63.** <sup>1</sup>H NMR spectrum of (1*R*,3*S*,4*R*)-3o

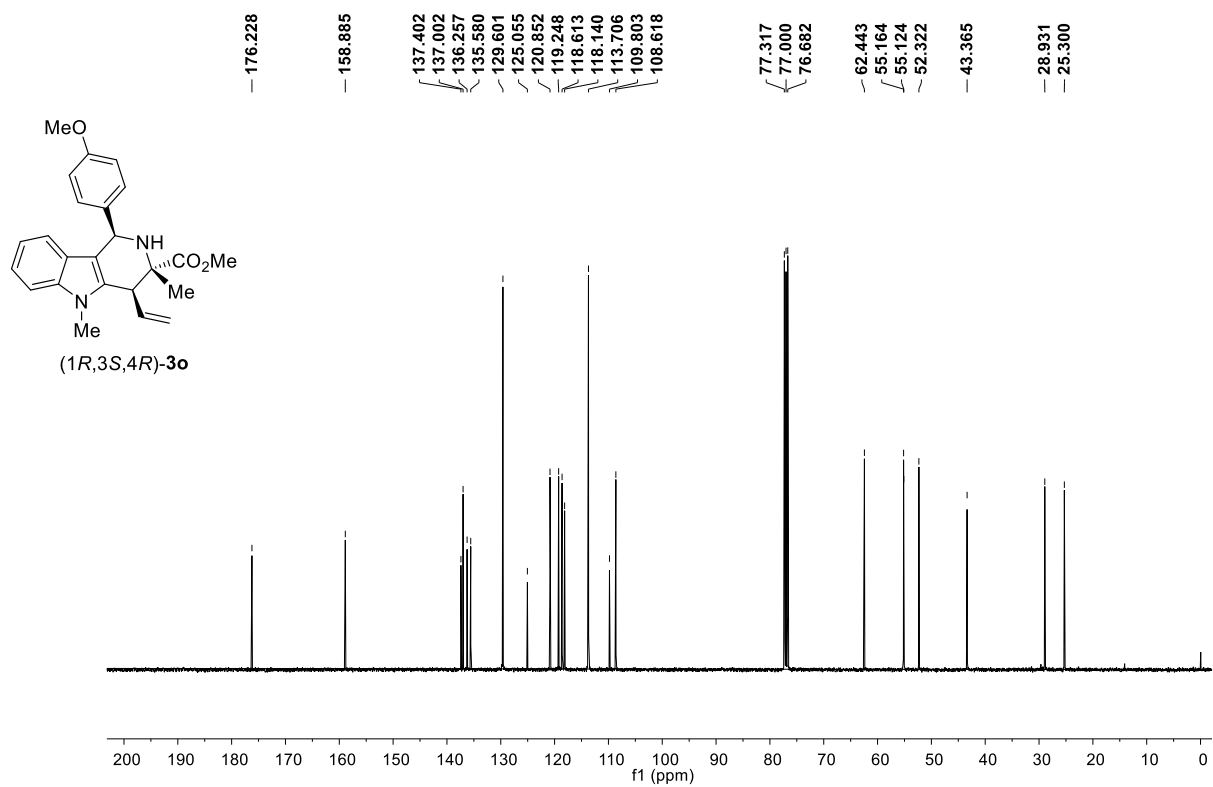

**Supplementary Figure 64.** <sup>13</sup>C NMR spectrum of (1*R*,3*S*,4*R*)-3o

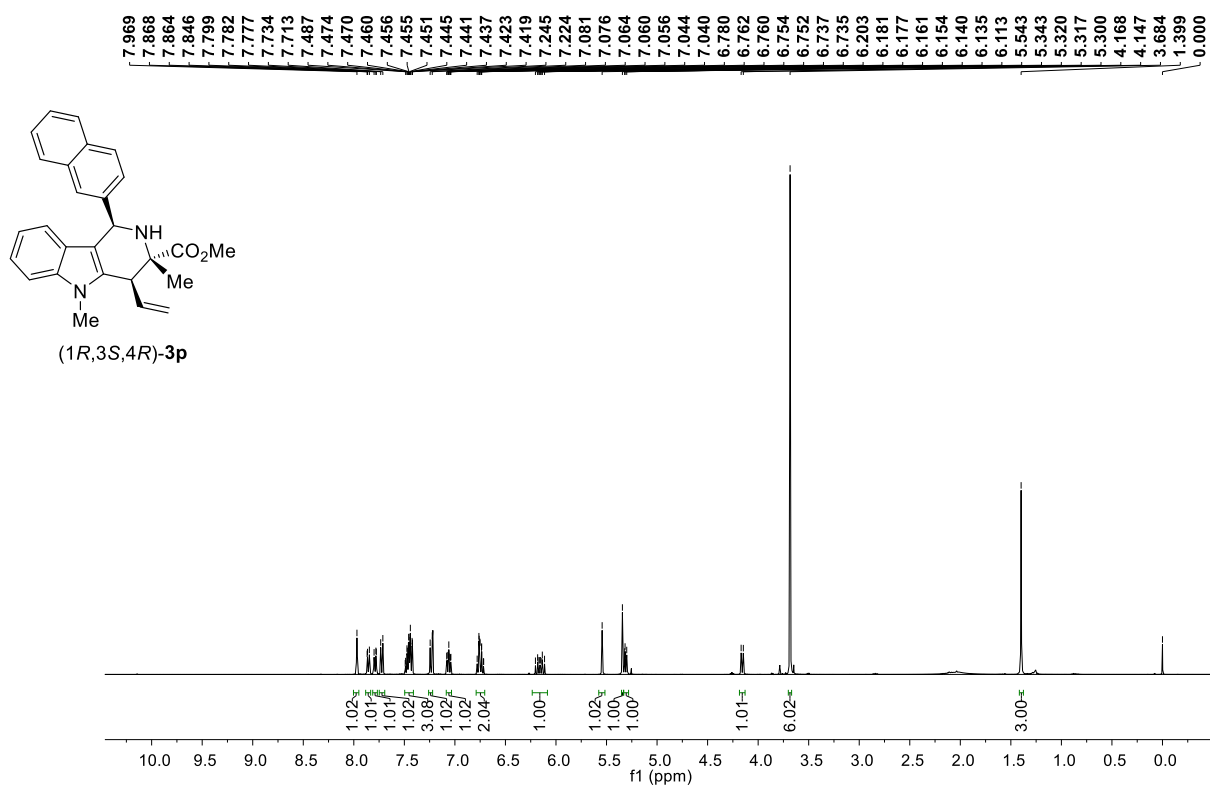

Supplementary Figure 65. <sup>1</sup>H NMR spectrum of (1*R*,3*S*,4*R*)-**3p**

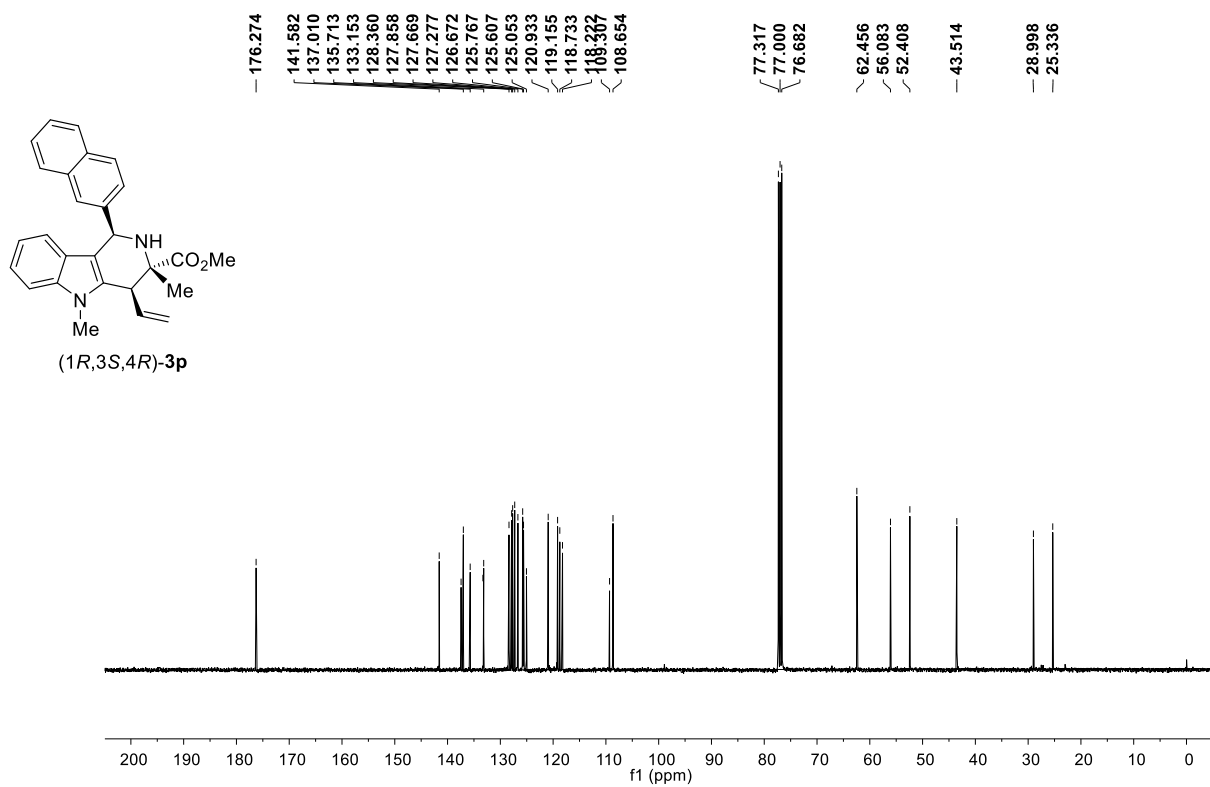

Supplementary Figure 66. <sup>13</sup>C NMR spectrum of (1*R*,3*S*,4*R*)-**3p**

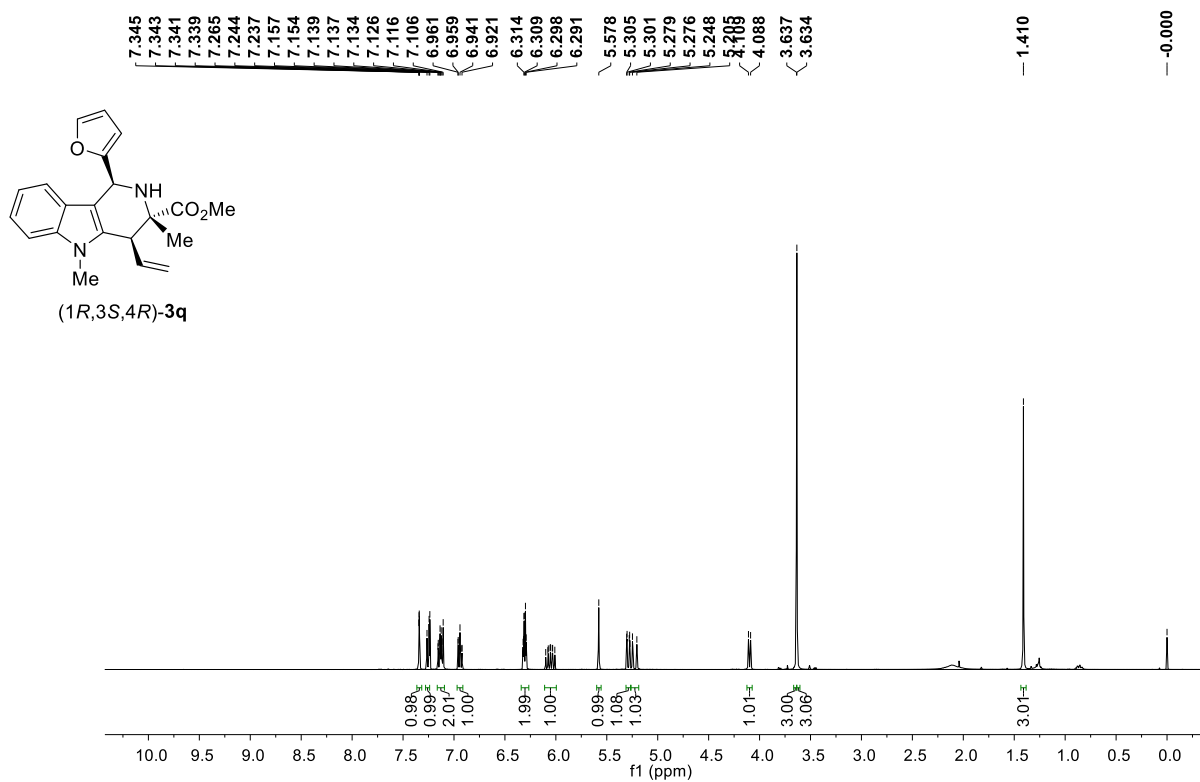

Supplementary Figure 67. <sup>1</sup>H NMR spectrum of (1*R*,3*S*,4*R*)-**3q**

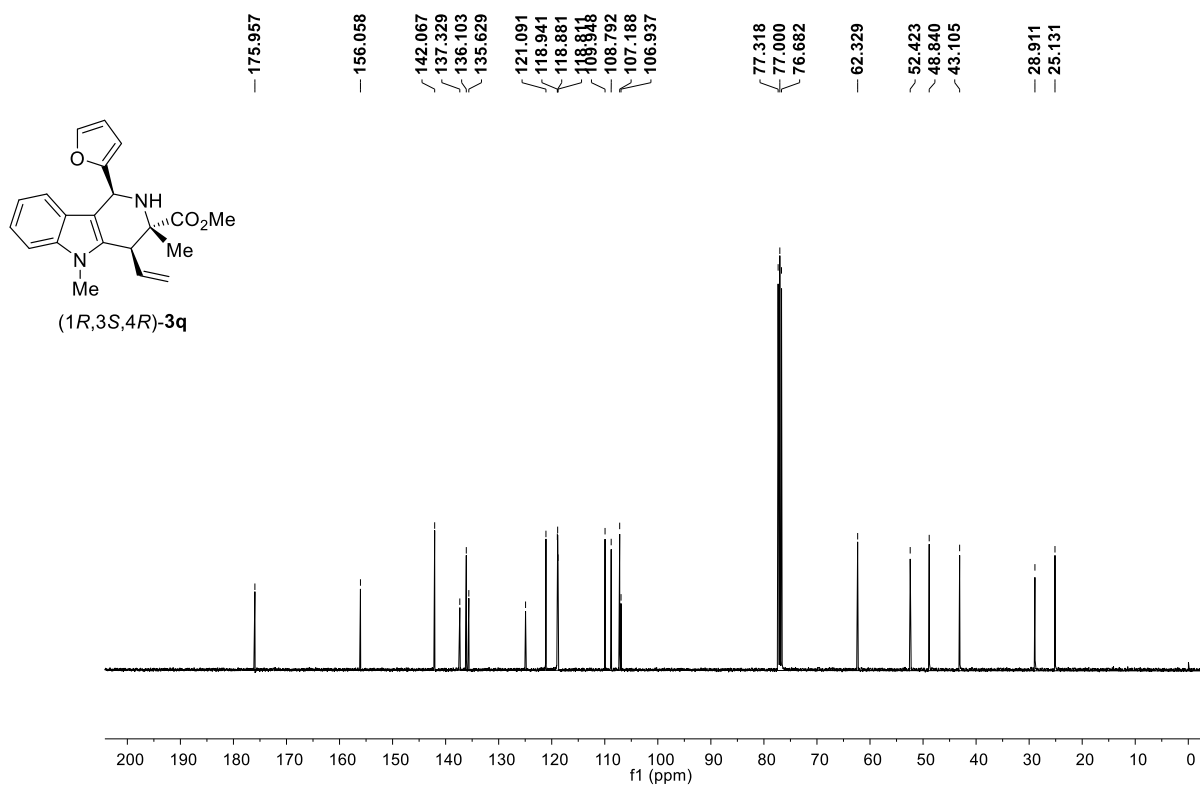

Supplementary Figure 68. <sup>13</sup>C NMR spectrum of (1*R*,3*S*,4*R*)-**3q**

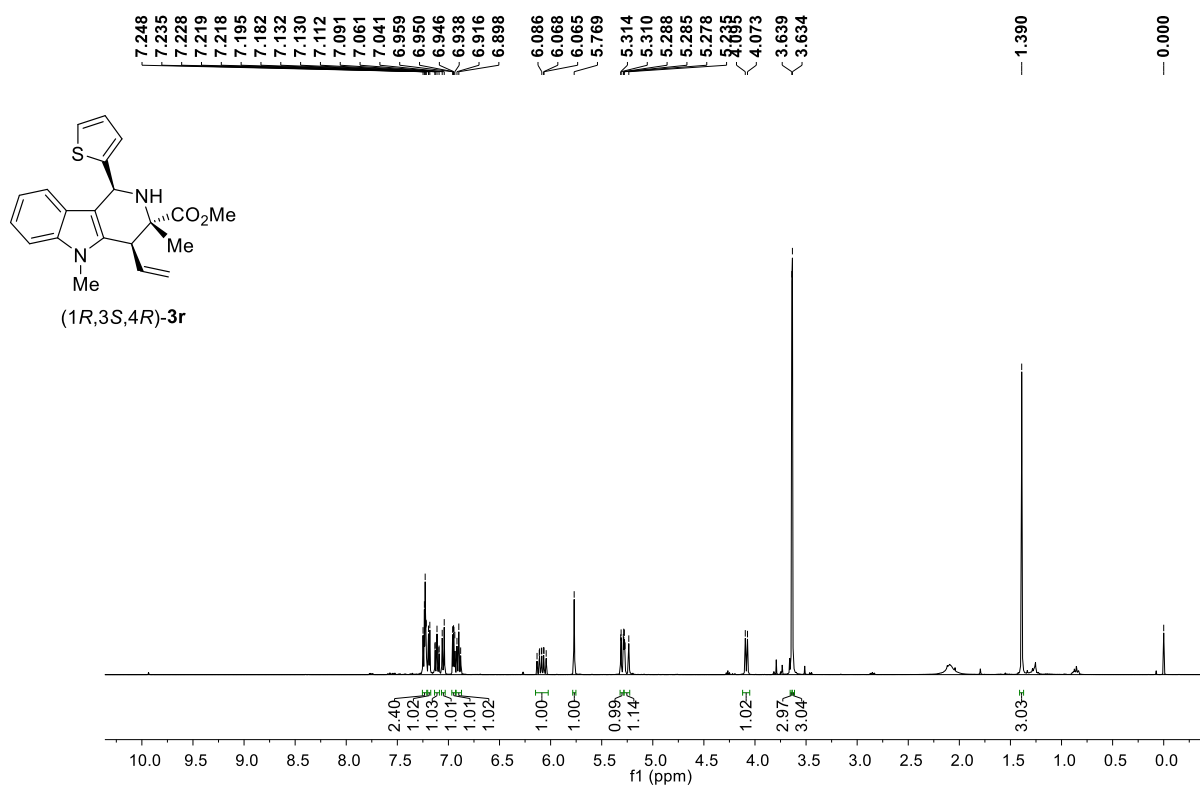

Supplementary Figure 69. <sup>1</sup>H NMR spectrum of (1*R*,3*S*,4*R*)-**3r**

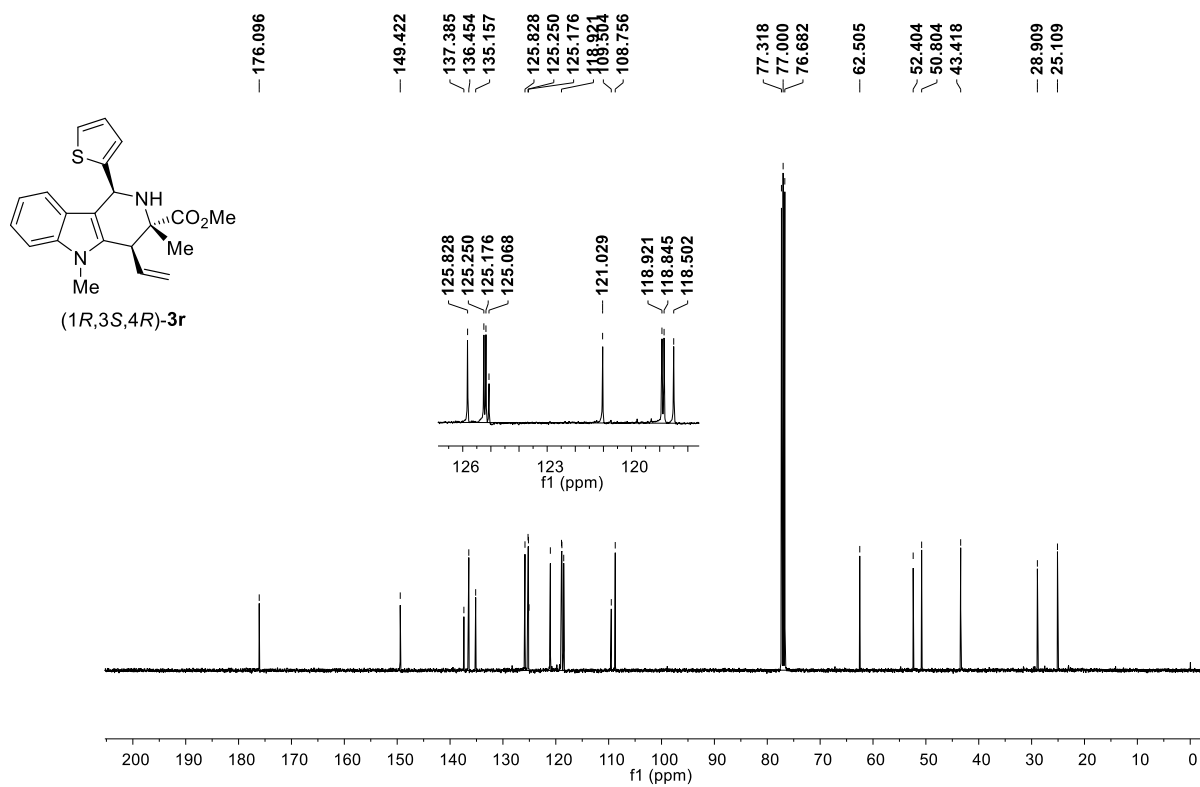

Supplementary Figure 70. <sup>13</sup>C NMR spectrum of (1*R*,3*S*,4*R*)-**3r**

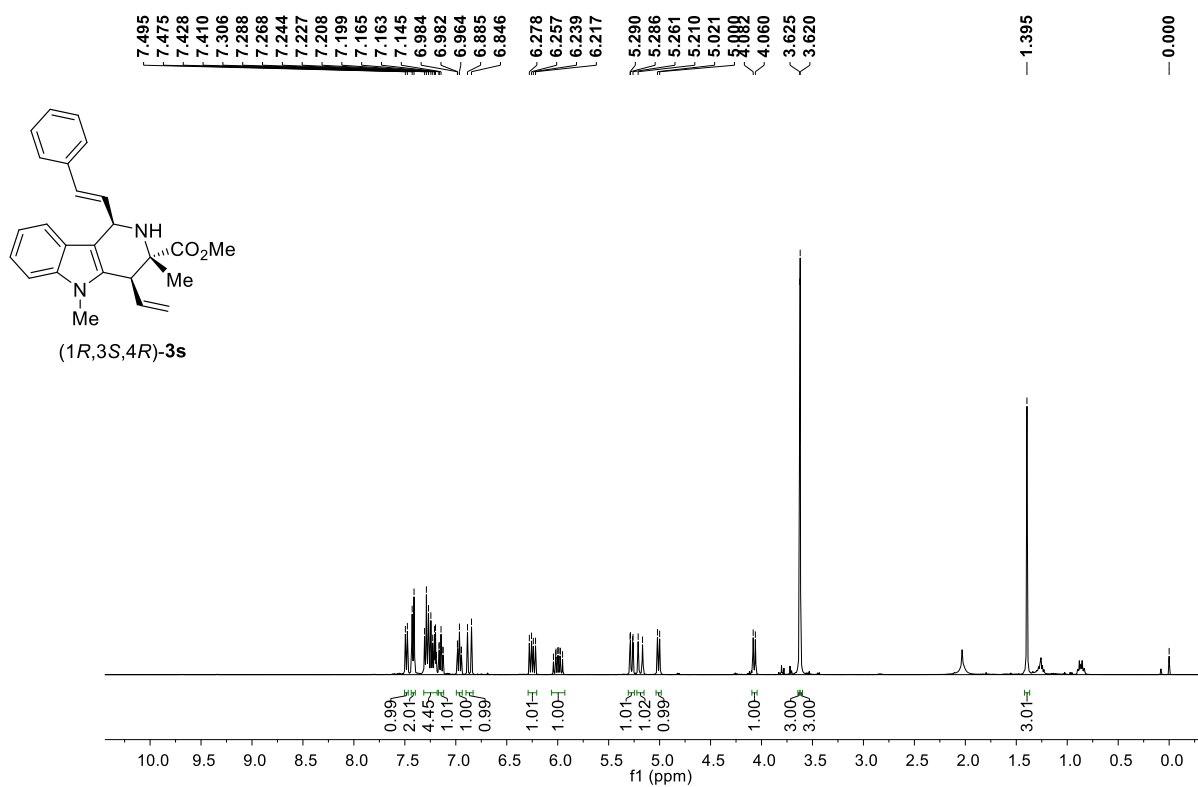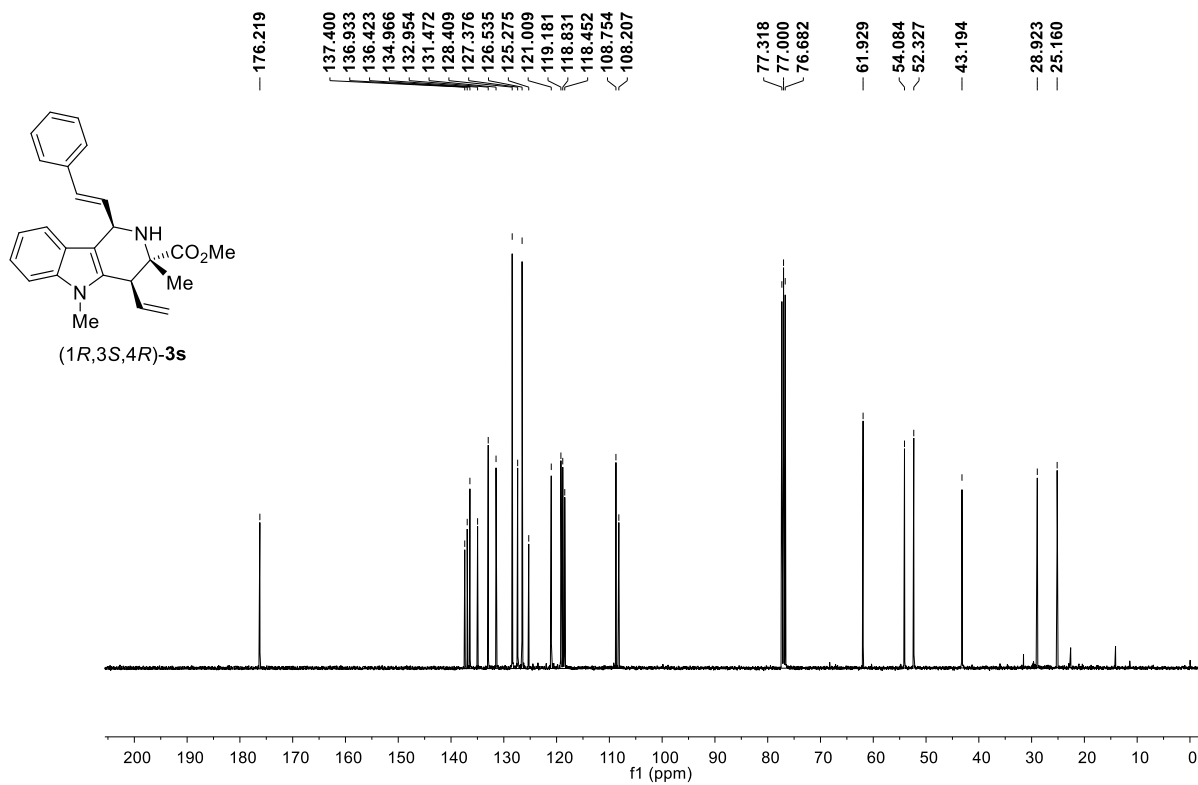

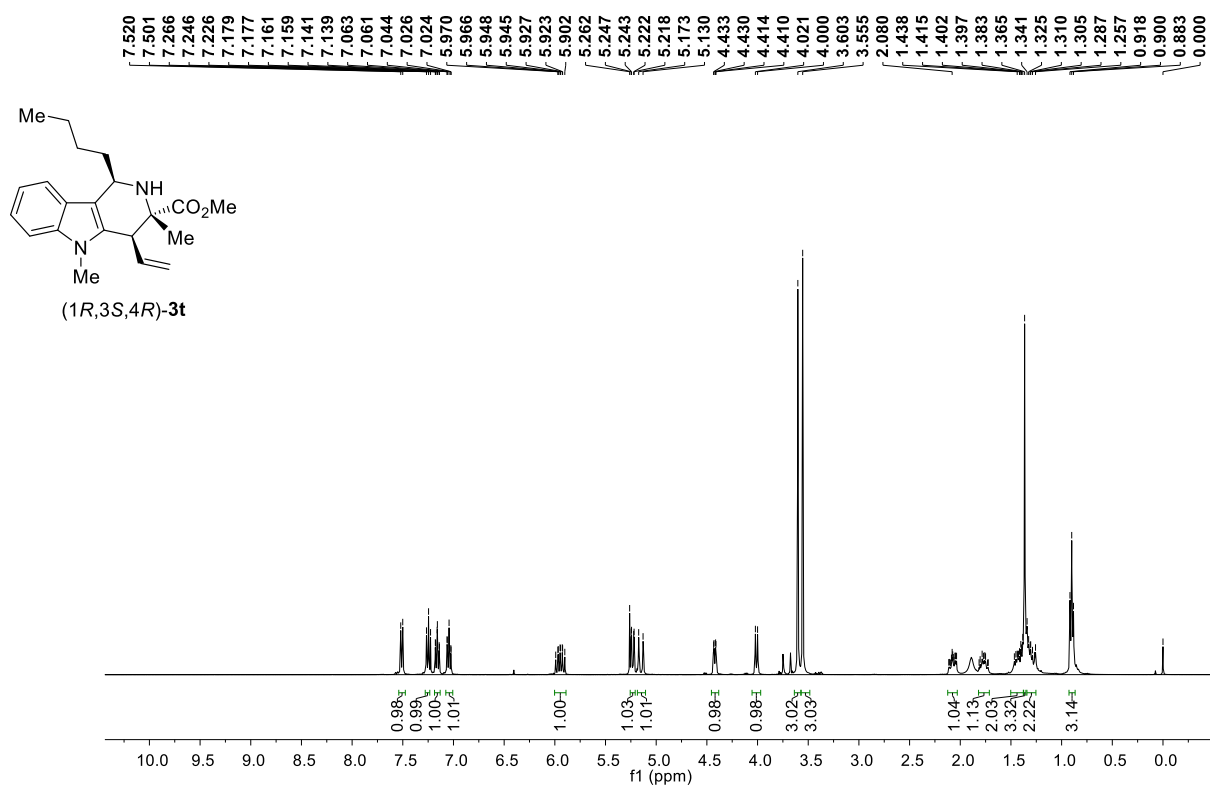

Supplementary Figure 73. <sup>1</sup>H NMR spectrum of (1*R*,3*S*,4*R*)-**3t**

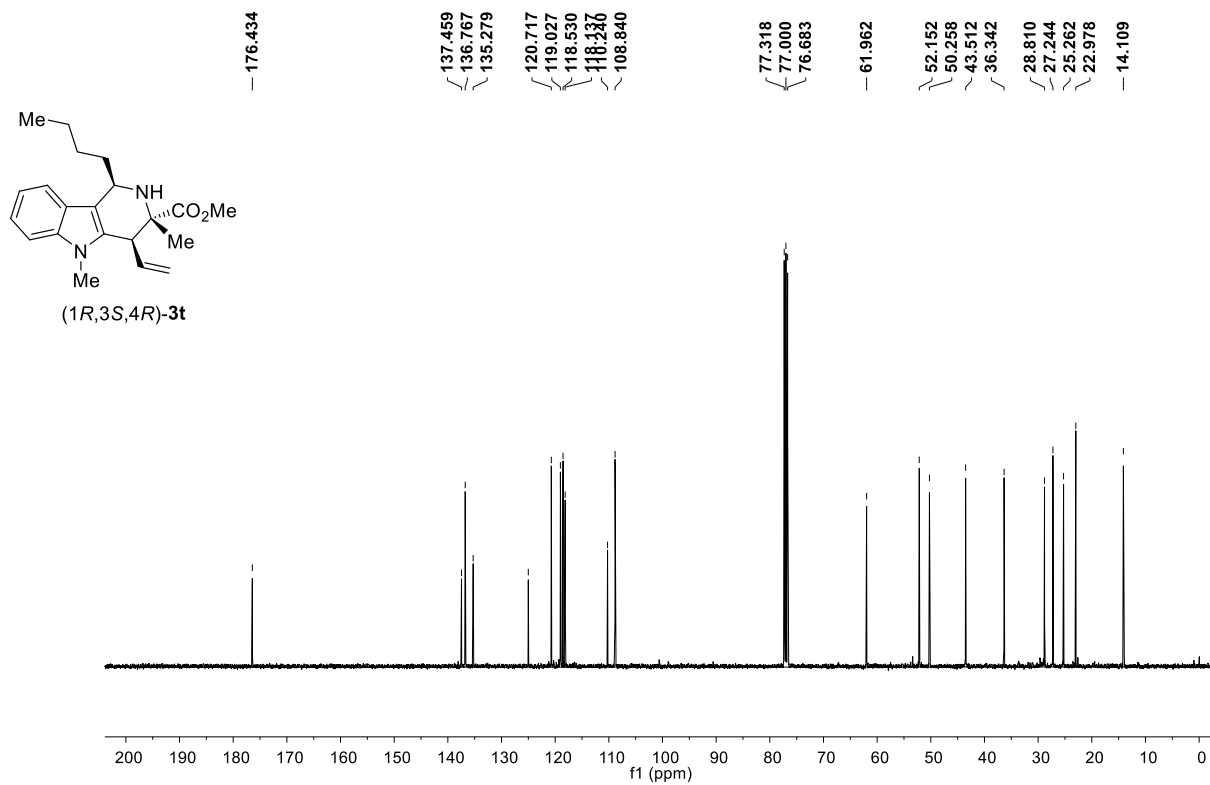

Supplementary Figure 74. <sup>13</sup>C NMR spectrum of (1*R*,3*S*,4*R*)-**3t**

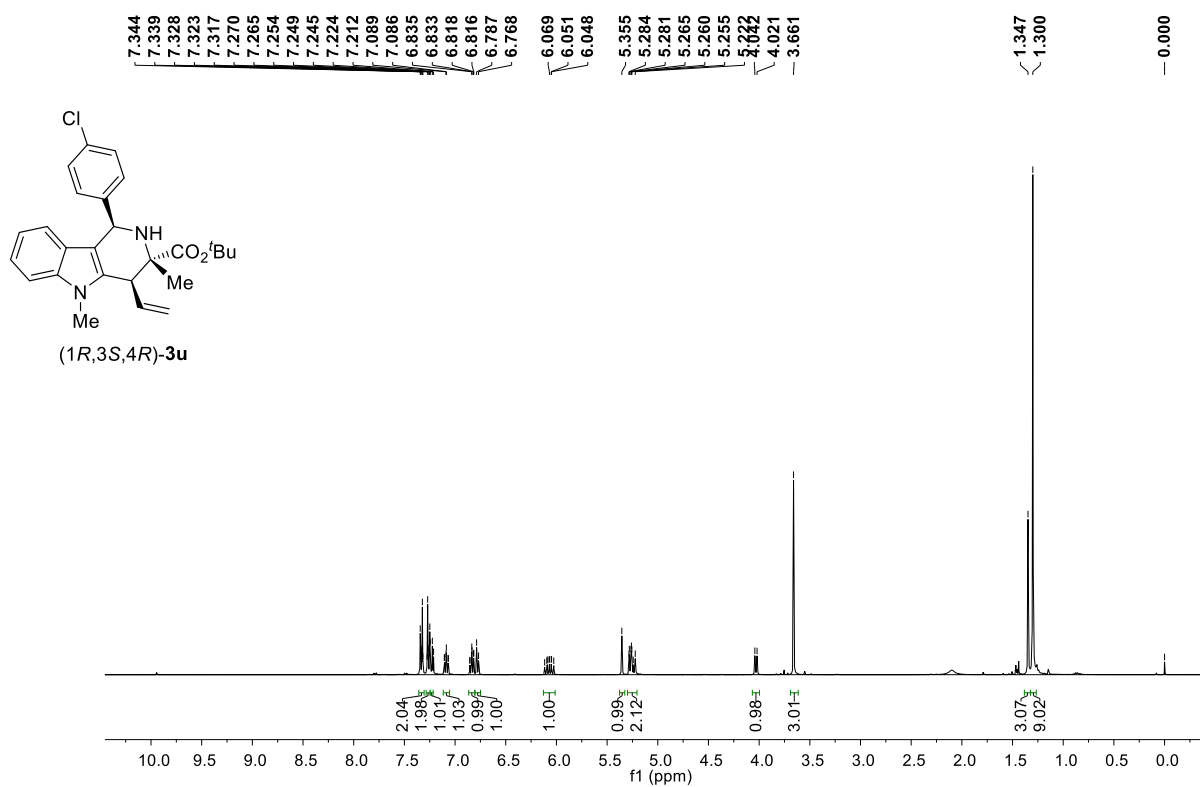

Supplementary Figure 75. <sup>1</sup>H NMR spectrum of (1*R*,3*S*,4*R*)-**3u**

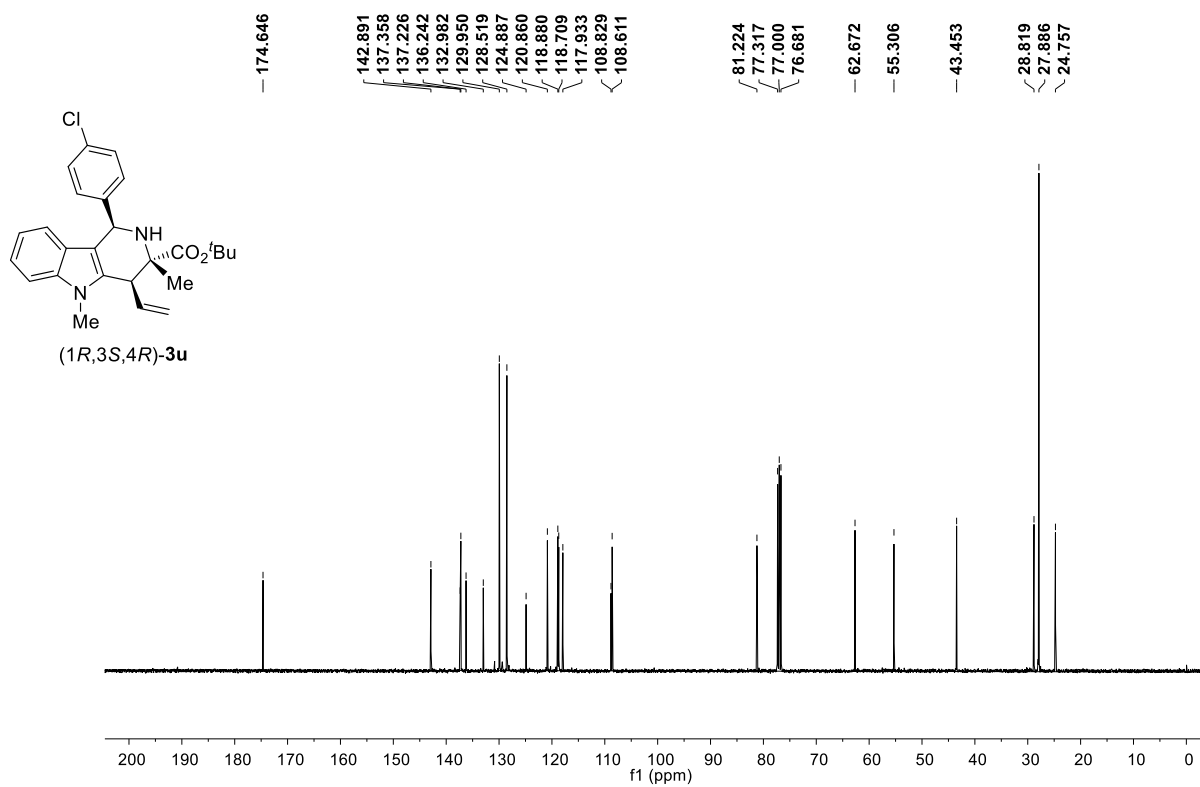

Supplementary Figure 76. <sup>13</sup>C NMR spectrum of (1*R*,3*S*,4*R*)-**3u**

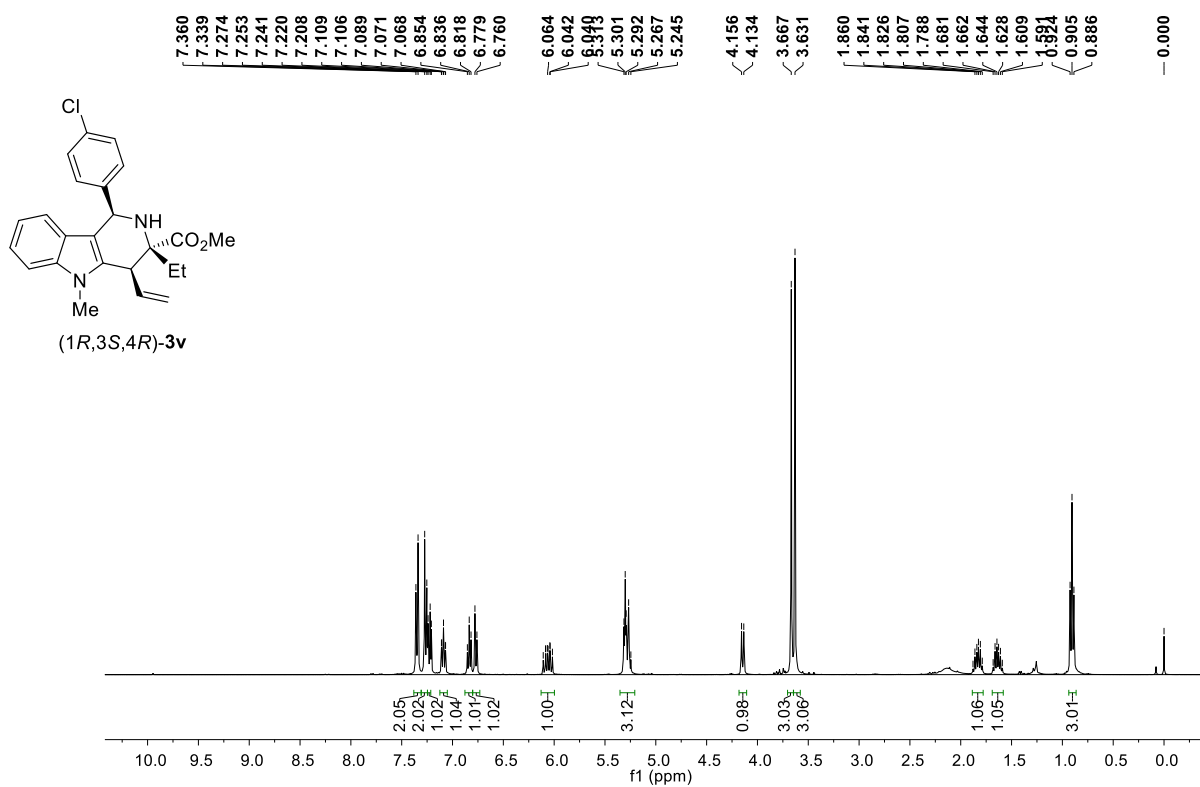

Supplementary Figure 77. <sup>1</sup>H NMR spectrum of (1*R*,3*S*,4*R*)-**3v**

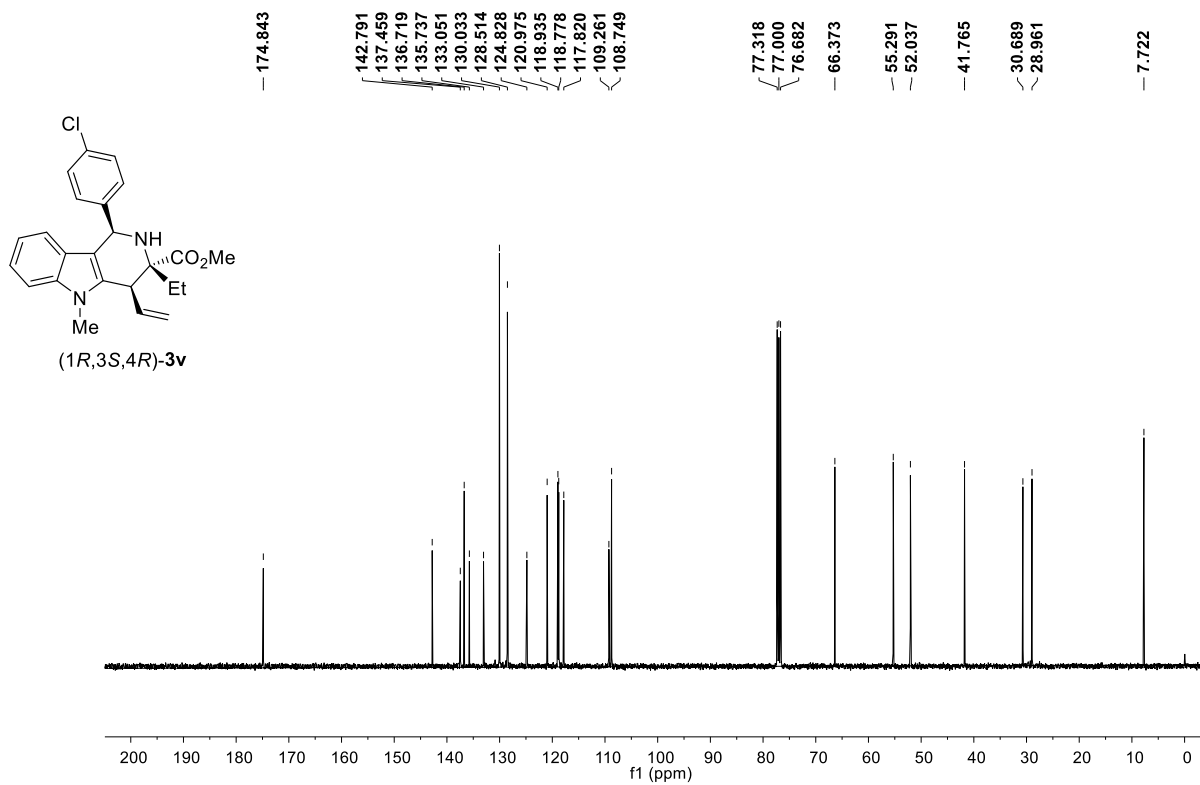

Supplementary Figure 78. <sup>13</sup>C NMR spectrum of (1*R*,3*S*,4*R*)-**3v**

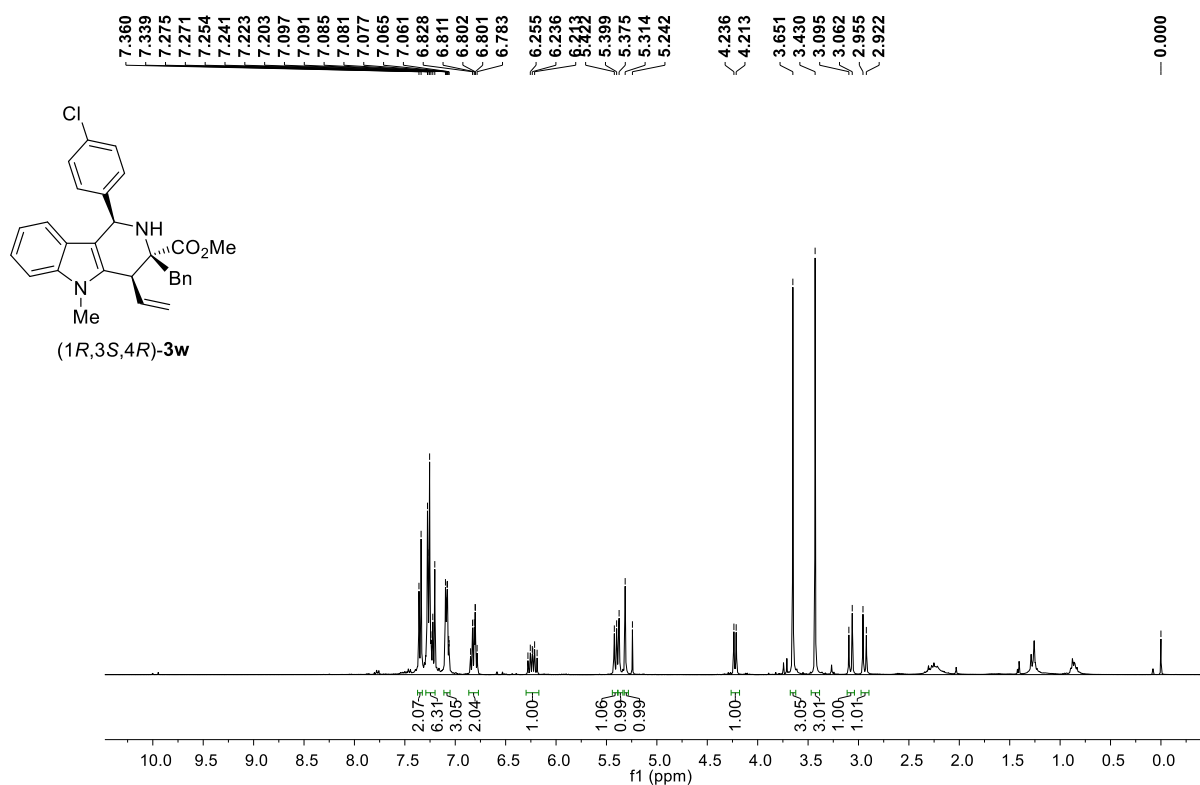

Supplementary Figure 79. <sup>1</sup>H NMR spectrum of (1*R*,3*S*,4*R*)-**3w**

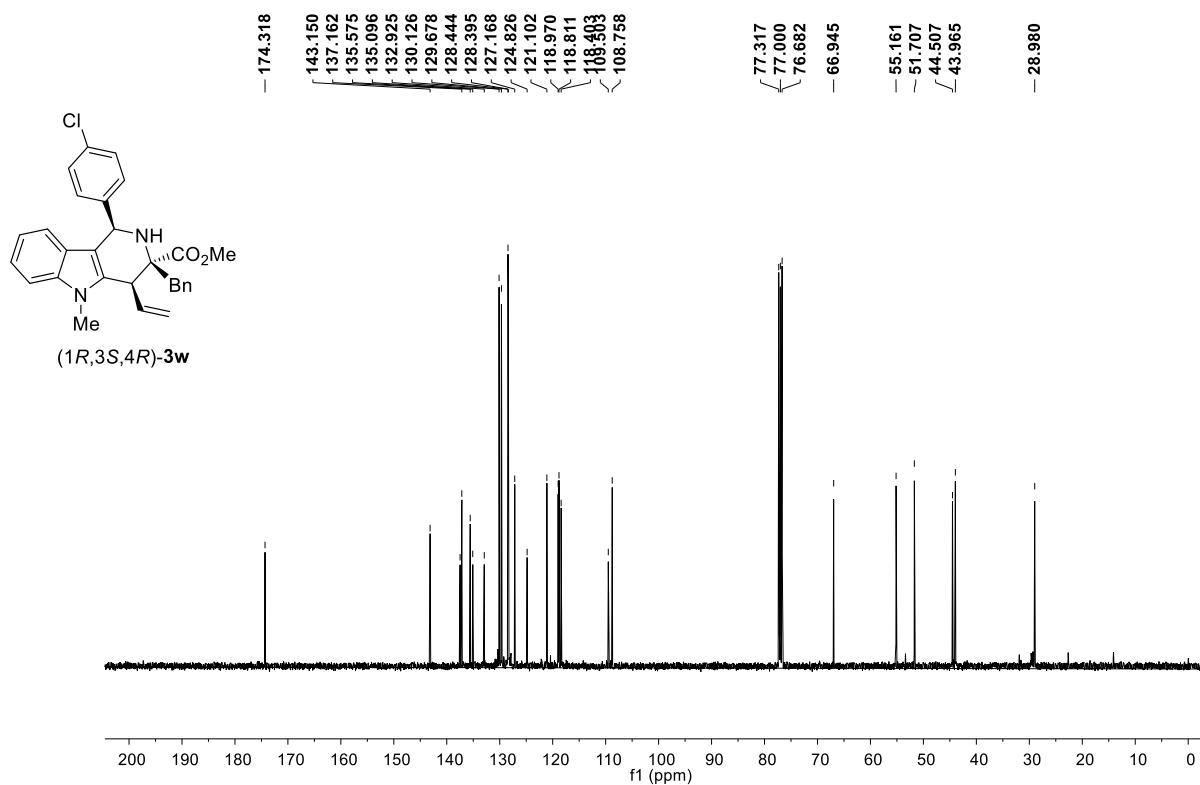

Supplementary Figure 80. <sup>13</sup>C NMR spectrum of (1*R*,3*S*,4*R*)-**3w**

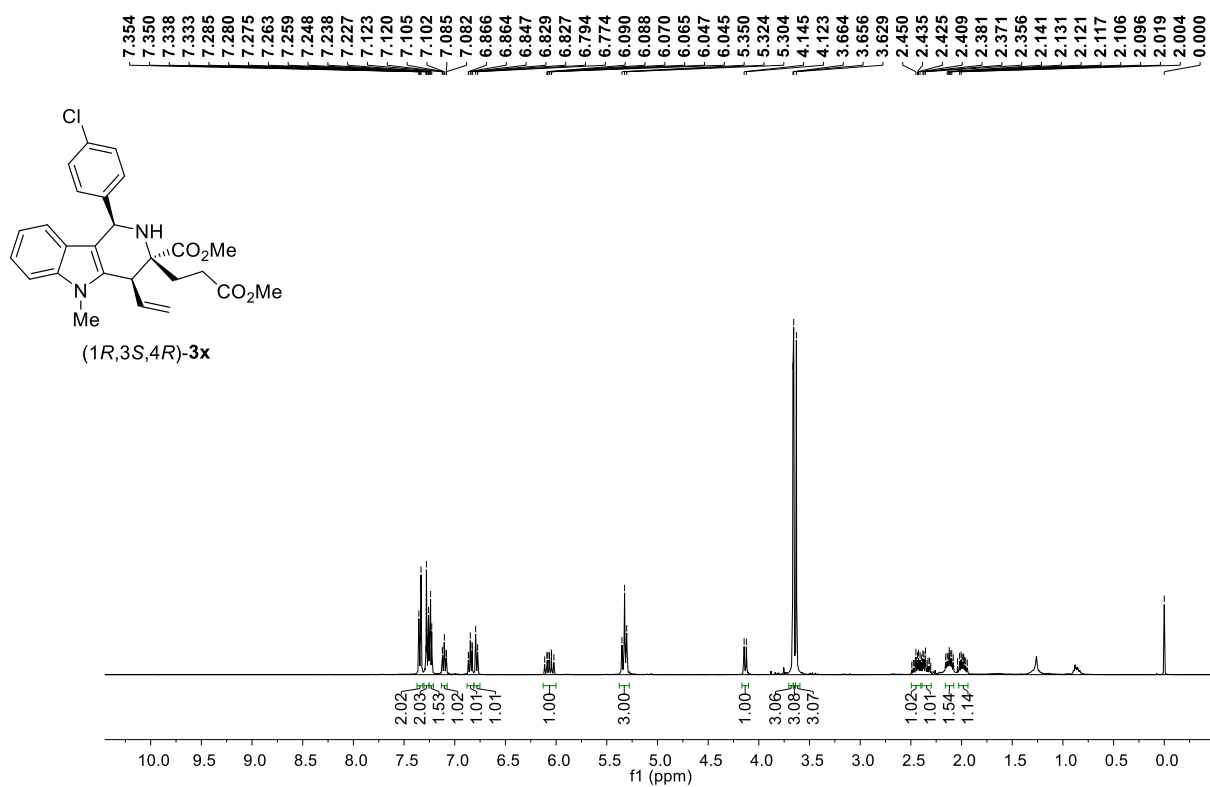

Supplementary Figure 81. <sup>1</sup>H NMR spectrum of (1*R*,3*S*,4*R*)-**3x**

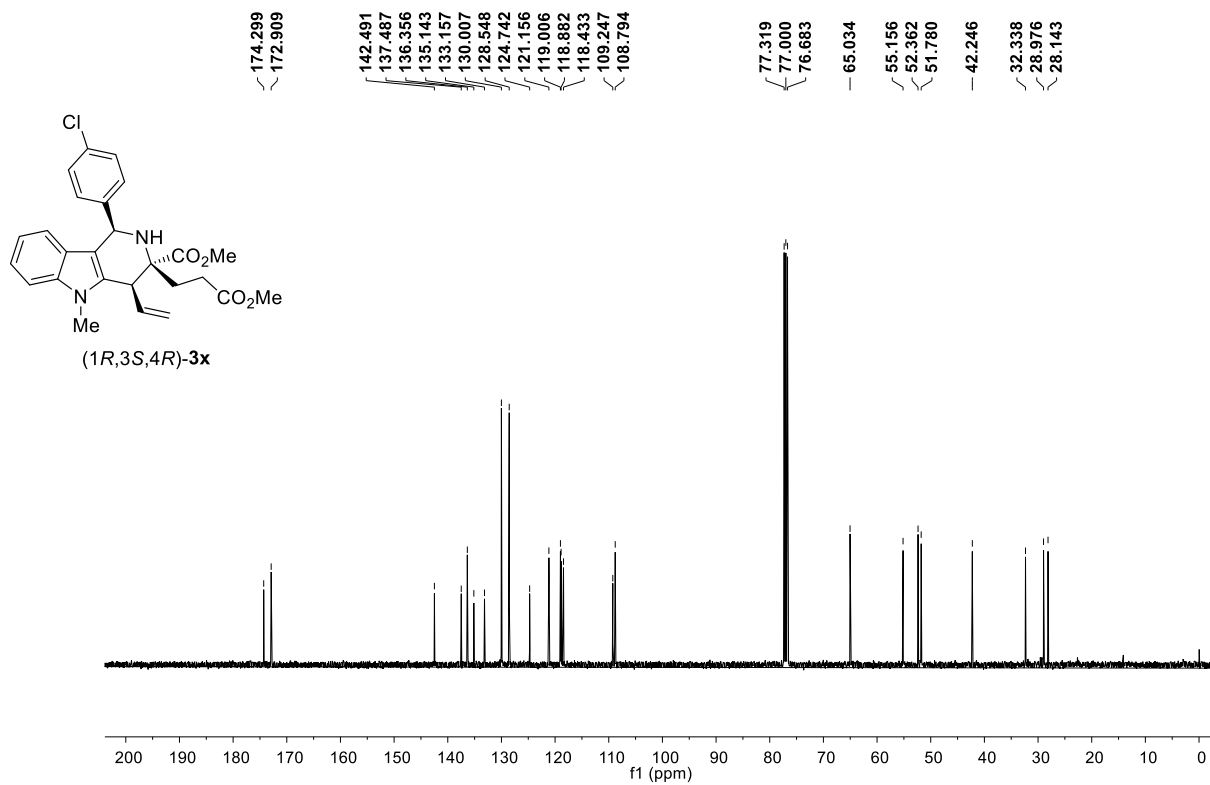

Supplementary Figure 82. <sup>13</sup>C NMR spectrum of (1*R*,3*S*,4*R*)-**3x**

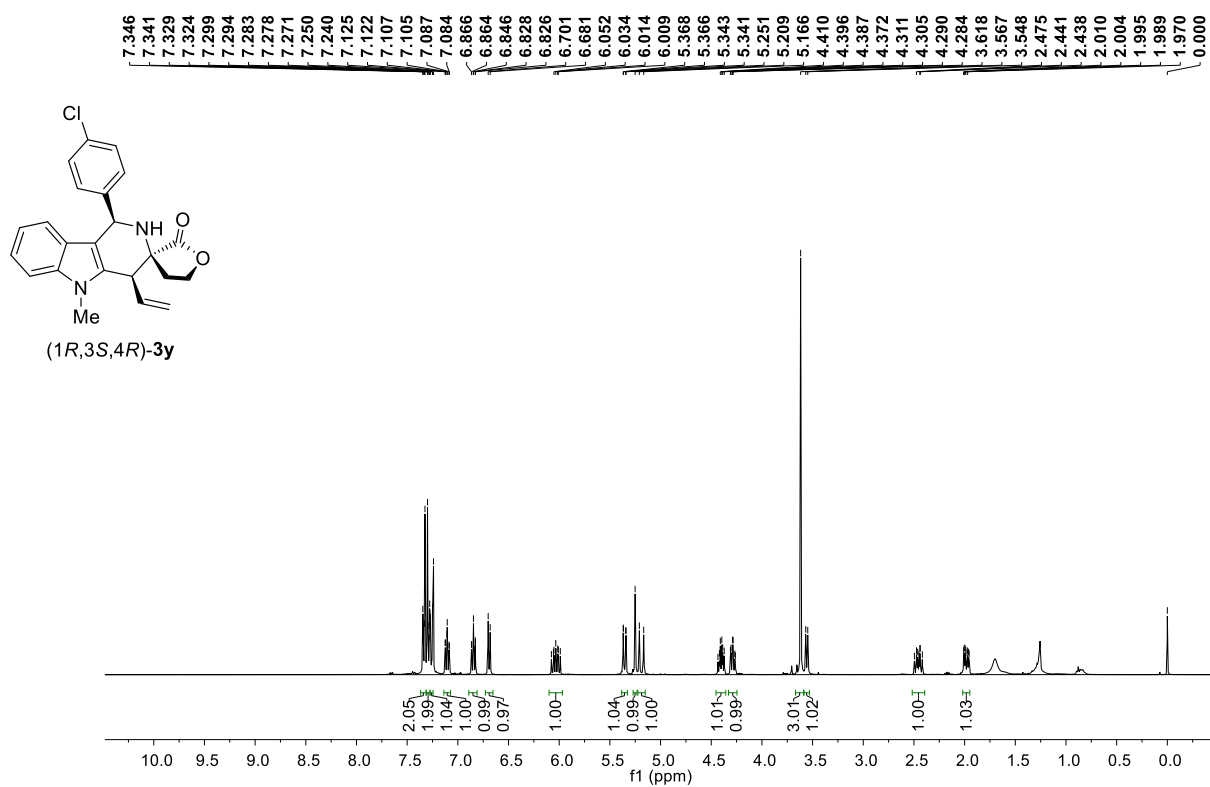

**Supplementary Figure 83.** <sup>1</sup>H NMR spectrum of (1R,3S,4R)-3y

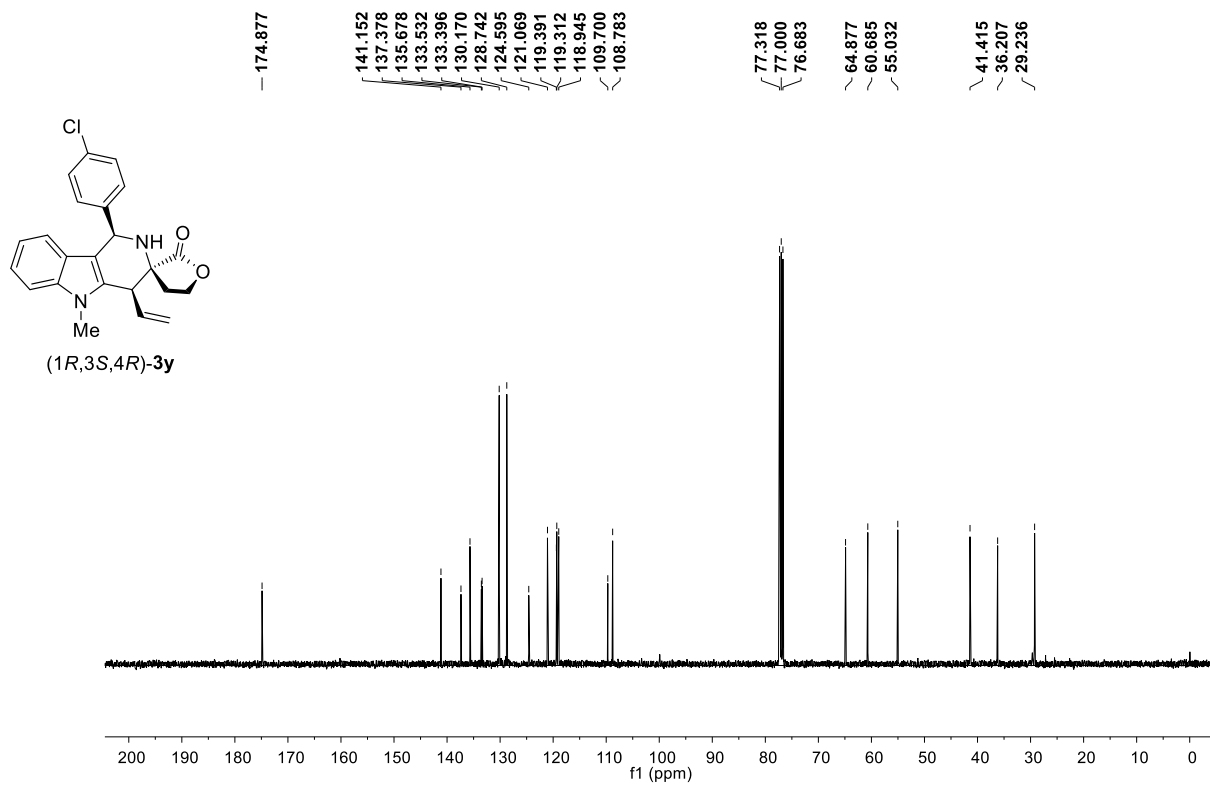

**Supplementary Figure 84.** <sup>13</sup>C NMR spectrum of (1R,3S,4R)-3y

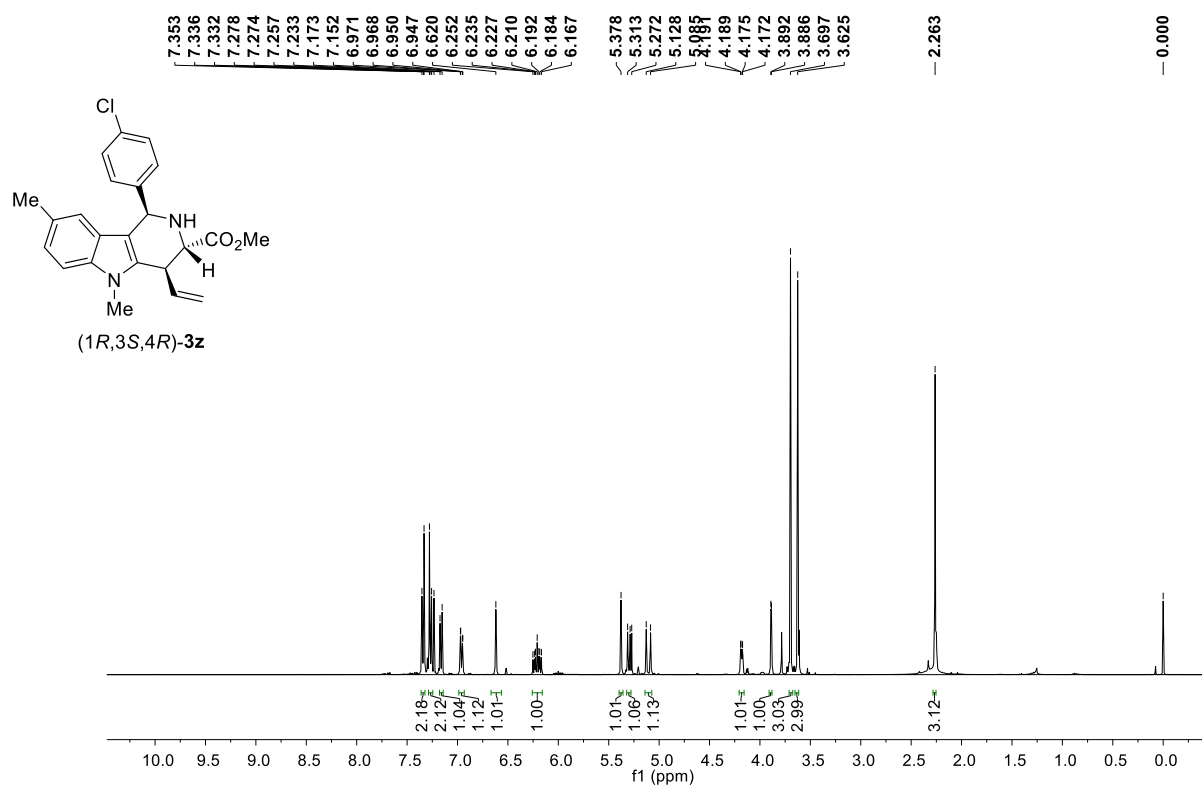

Supplementary Figure 85. <sup>1</sup>H NMR spectrum of (1*R*,3*S*,4*R*)-**3z**

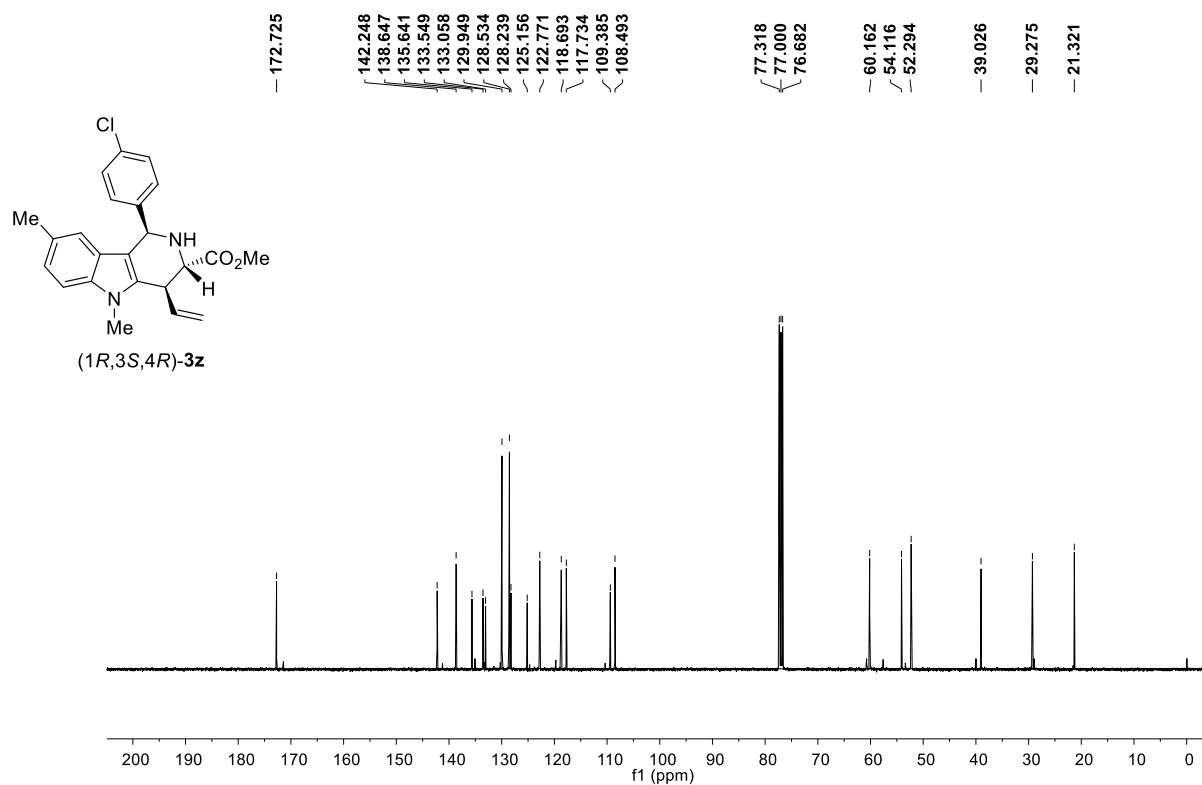

Supplementary Figure 86. <sup>13</sup>C NMR spectrum of (1*R*,3*S*,4*R*)-**3z**

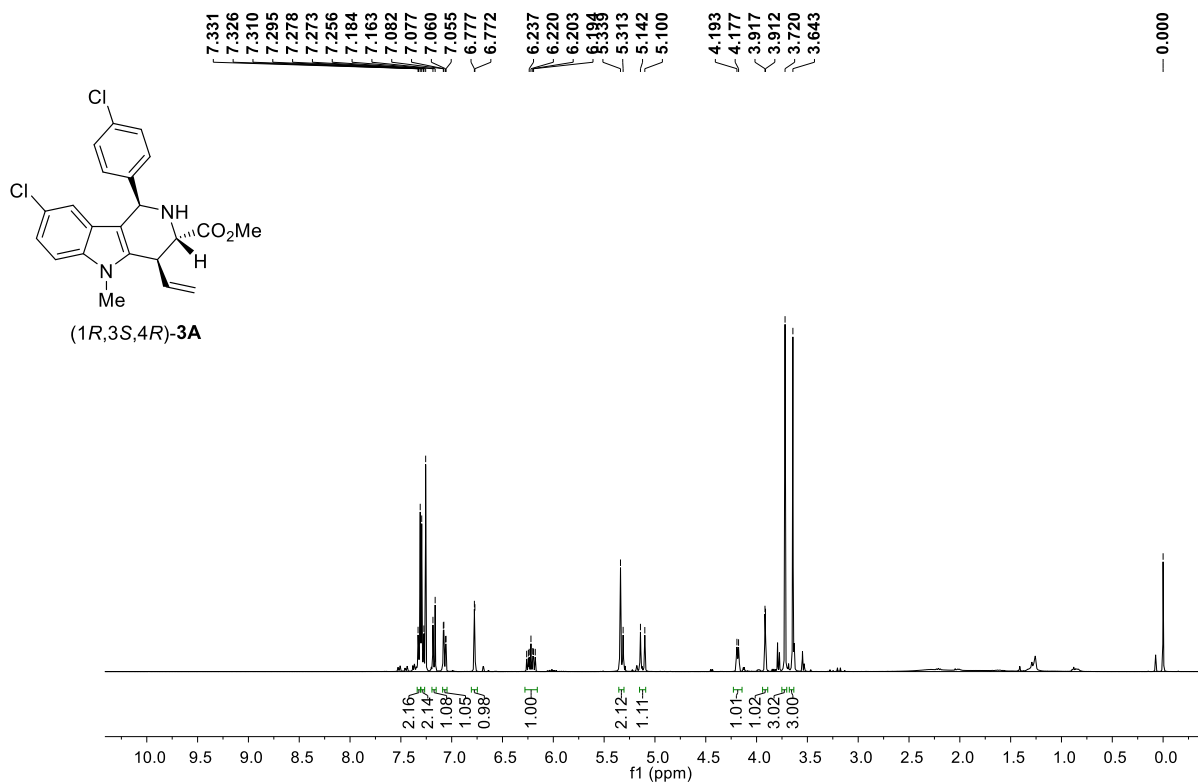

Supplementary Figure 87. <sup>1</sup>H NMR spectrum of (1R,3S,4R)-3A

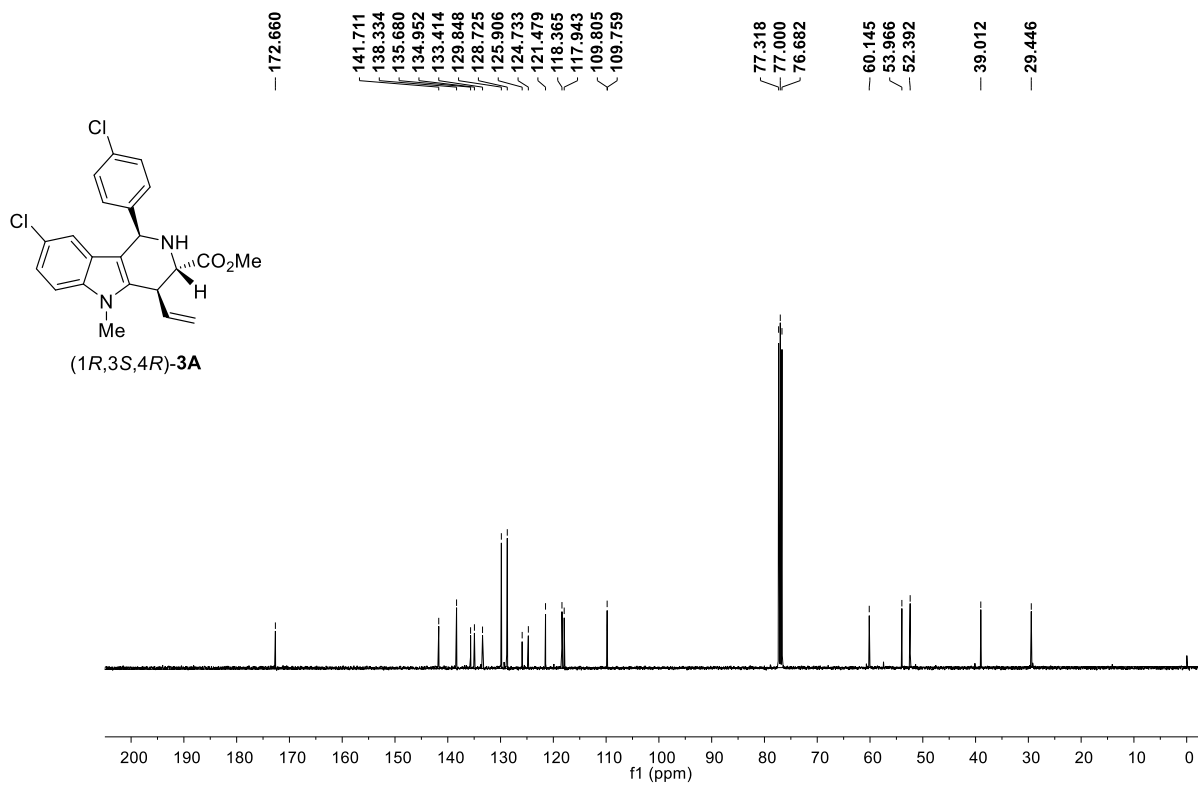

Supplementary Figure 88. <sup>13</sup>C NMR spectrum of (1R,3S,4R)-3A

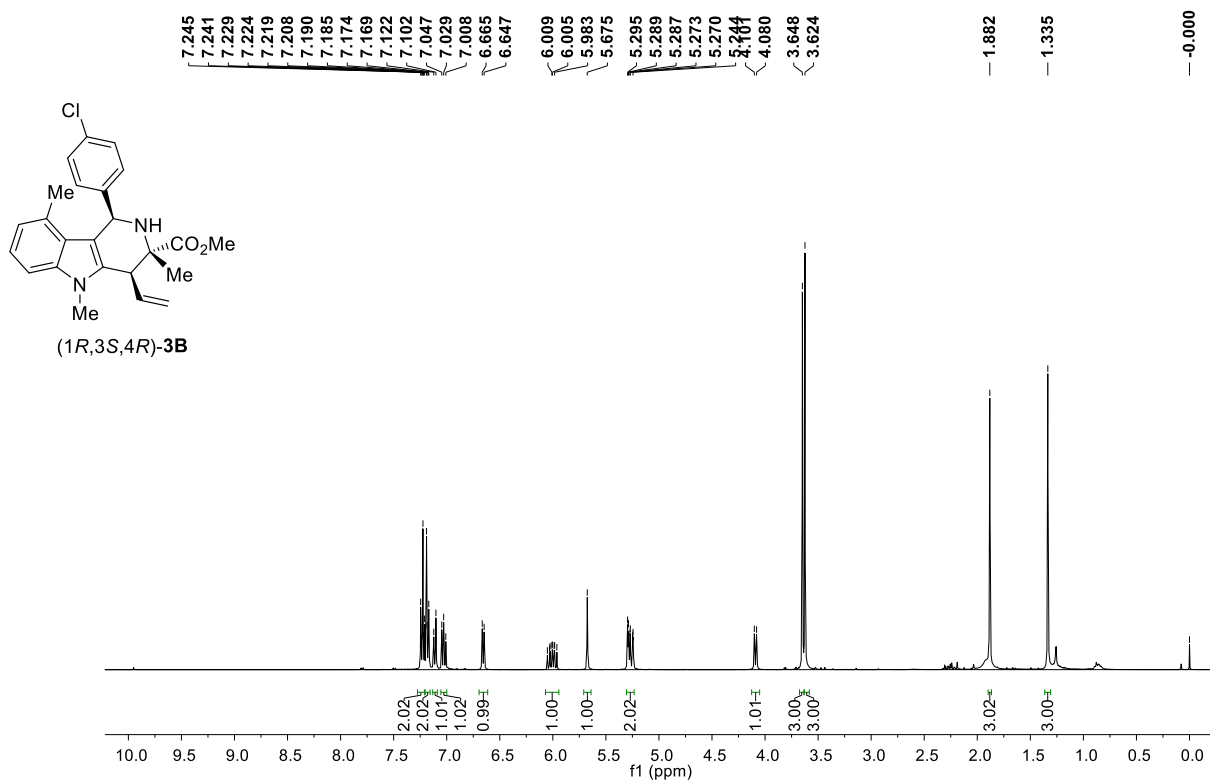

Supplementary Figure 89. <sup>1</sup>H NMR spectrum of (1R,3S,4R)-3B

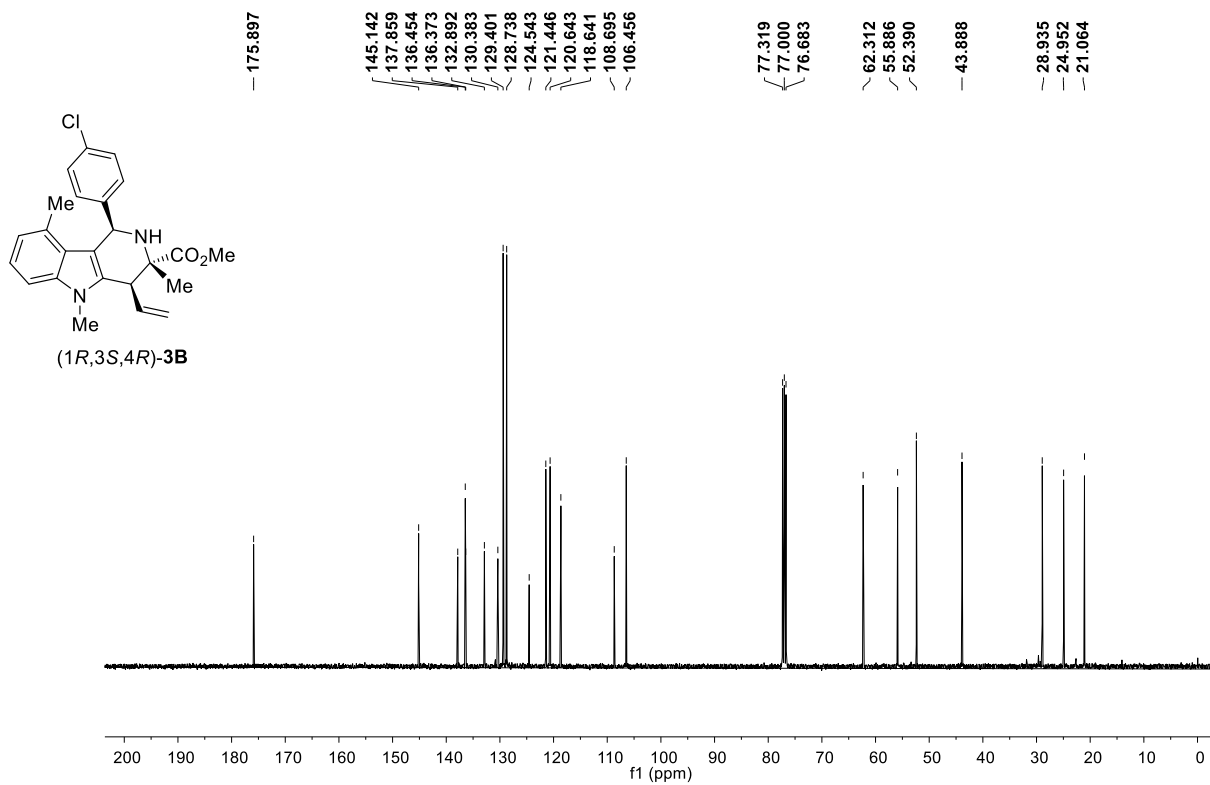

Supplementary Figure 90. <sup>13</sup>C NMR spectrum of (1R,3S,4R)-3B

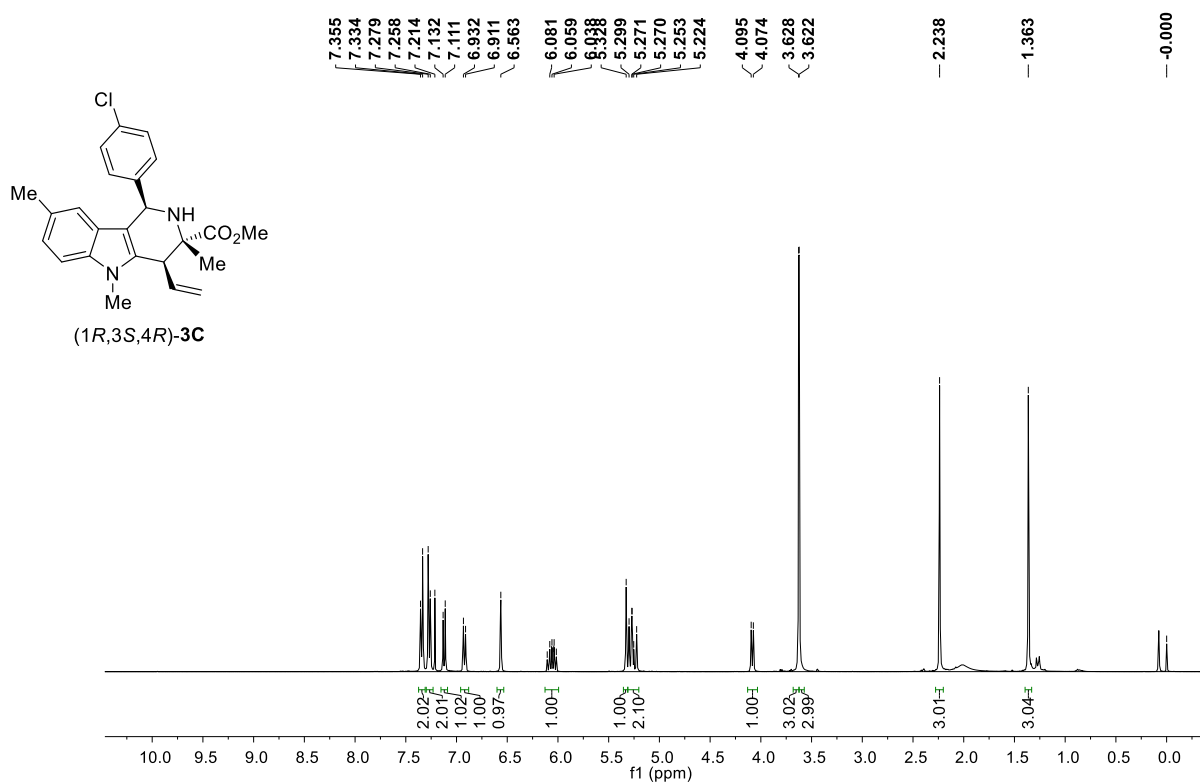

Supplementary Figure 91. <sup>1</sup>H NMR spectrum of (1*R*,3*S*,4*R*)-**3C**

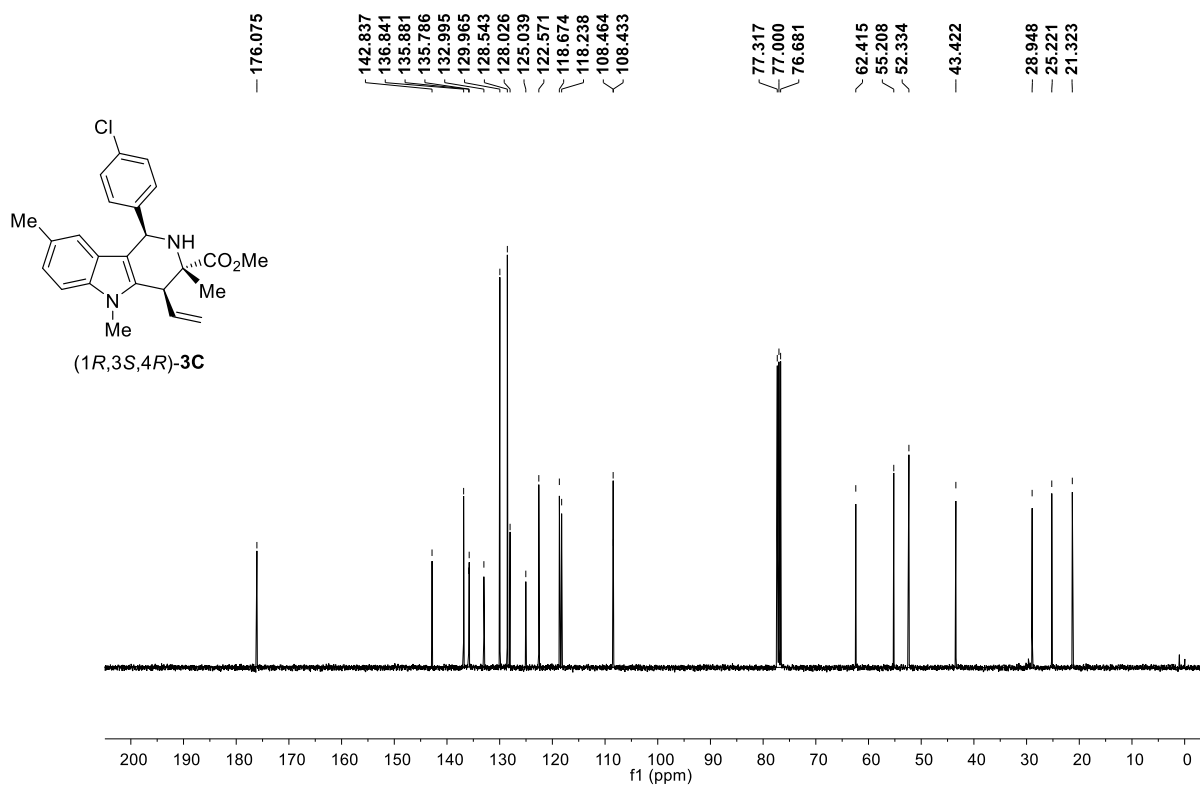

Supplementary Figure 92. <sup>13</sup>C NMR spectrum of (1*R*,3*S*,4*R*)-**3C**

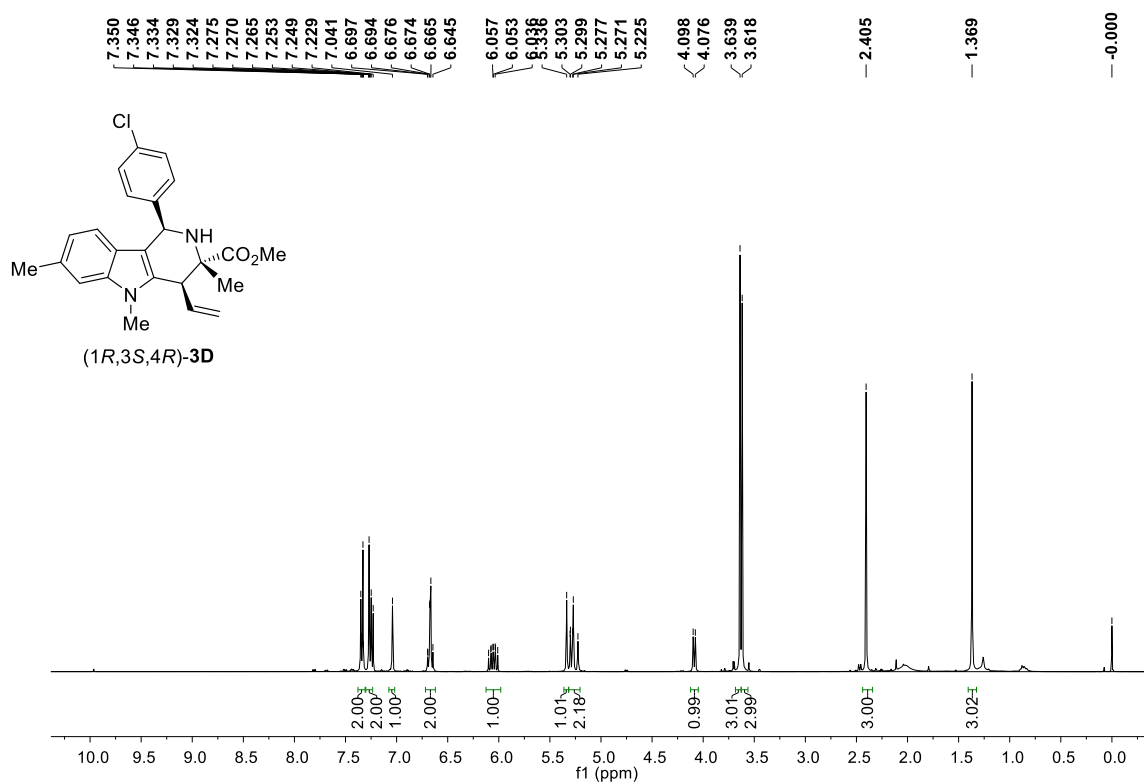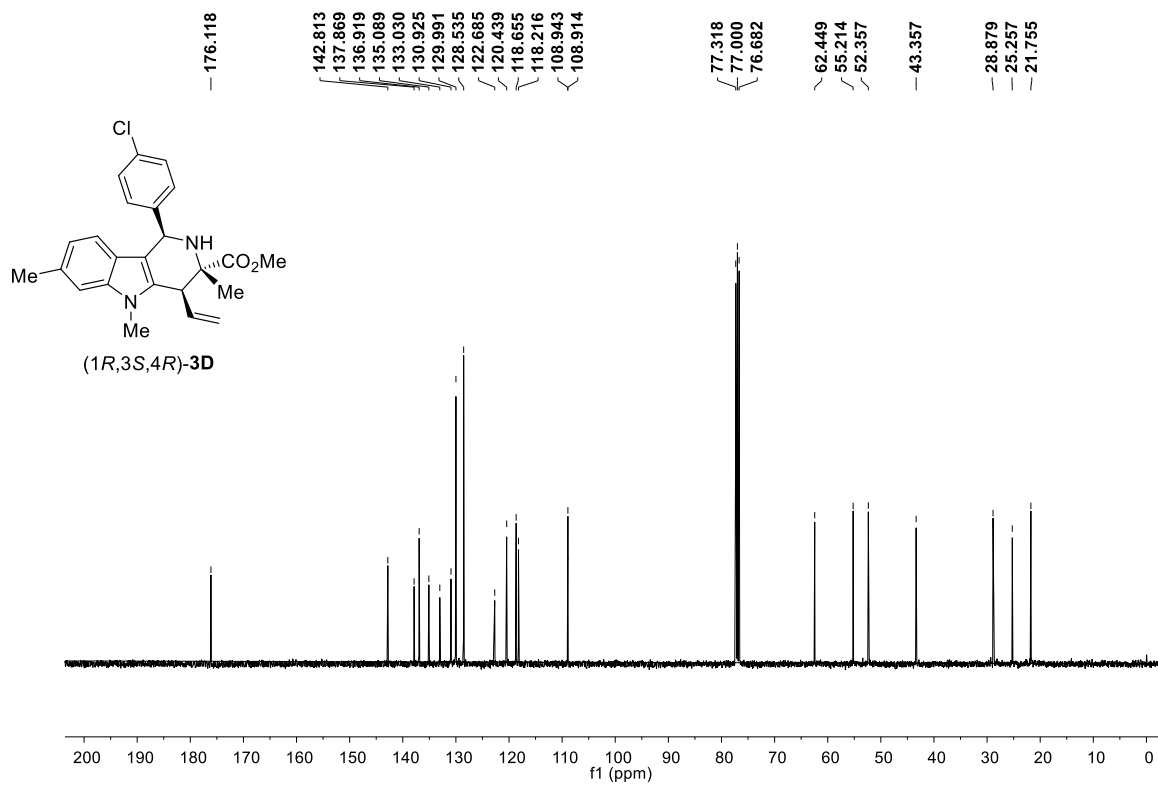

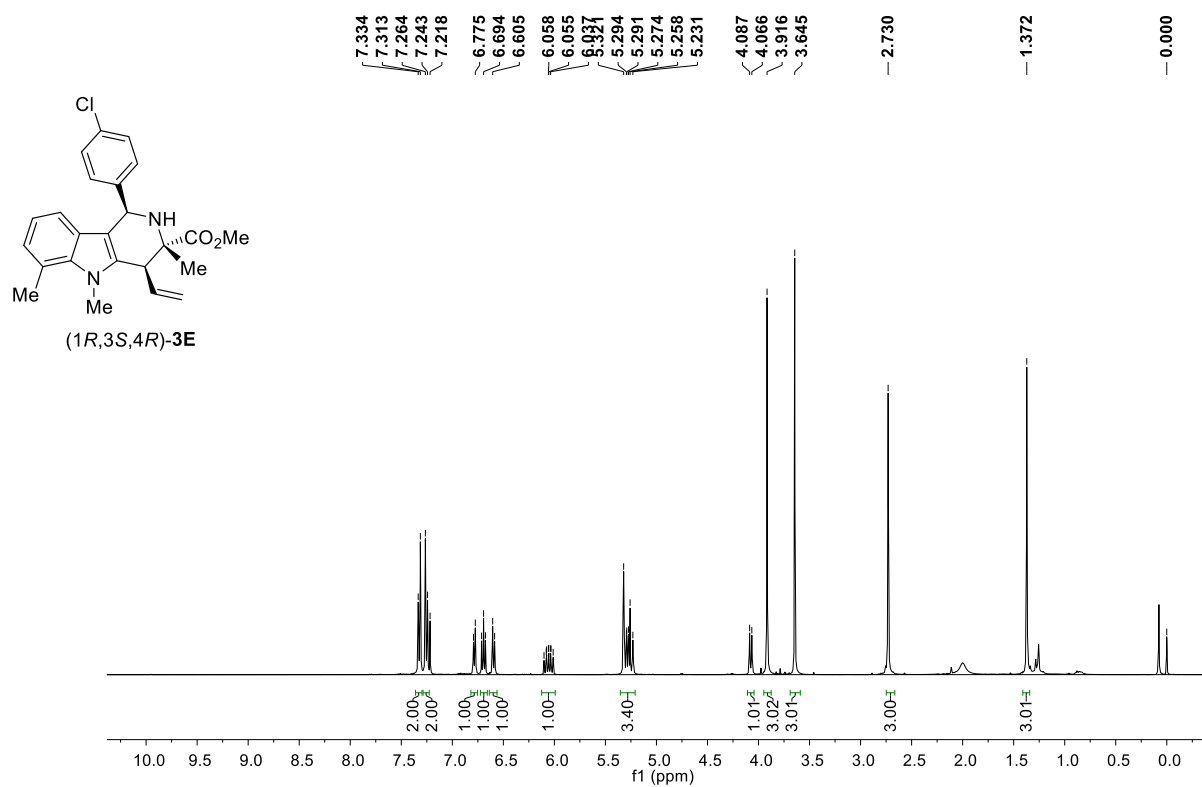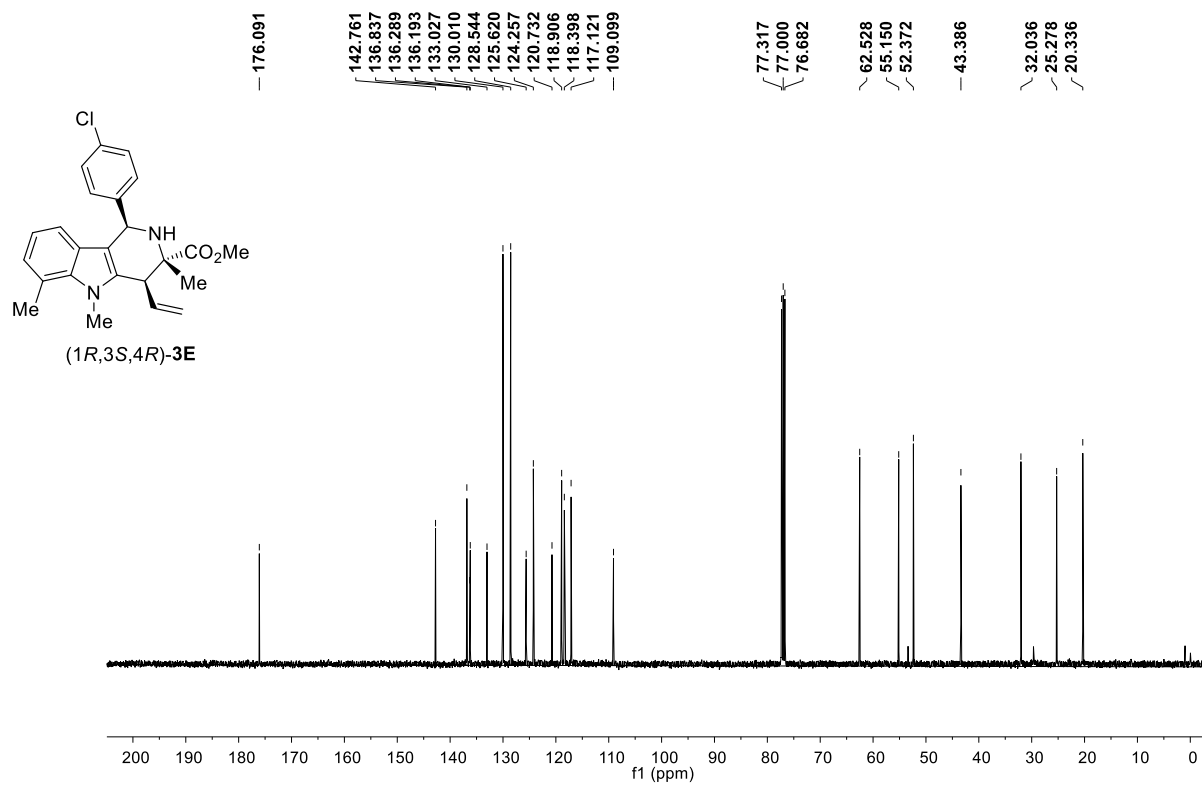

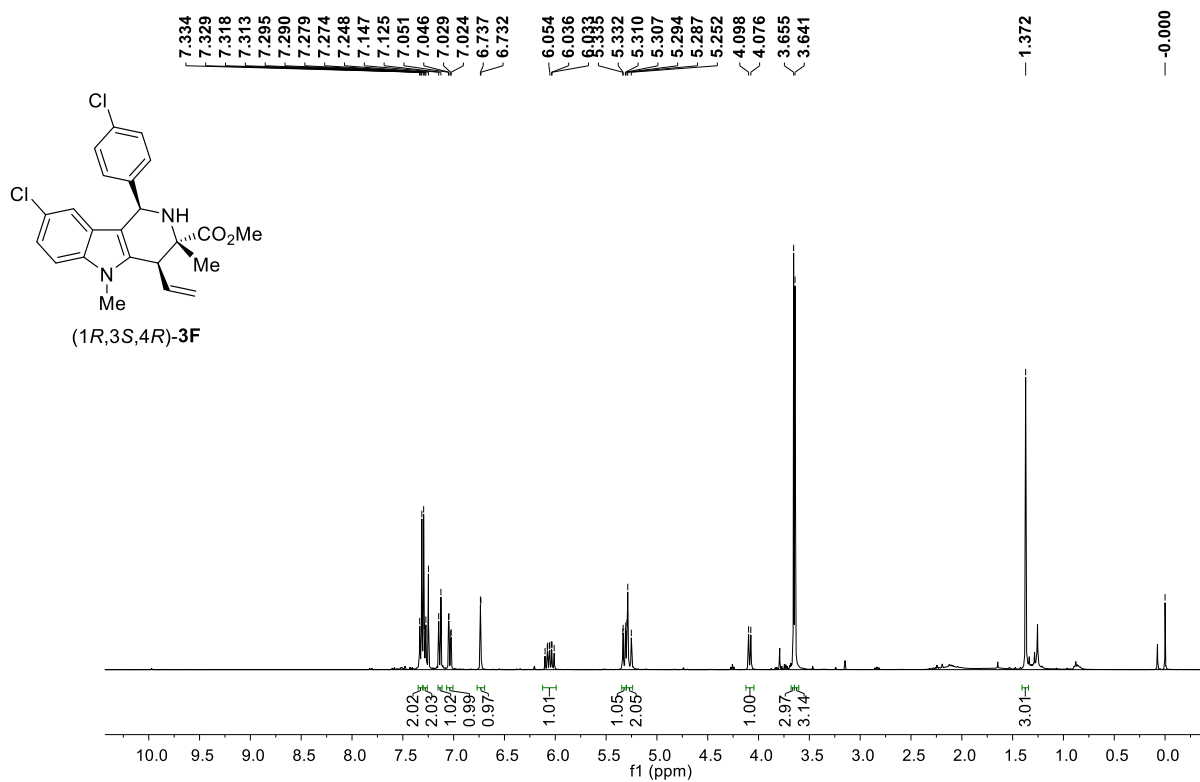

Supplementary Figure 97. <sup>1</sup>H NMR spectrum of (1R,3S,4R)-3F

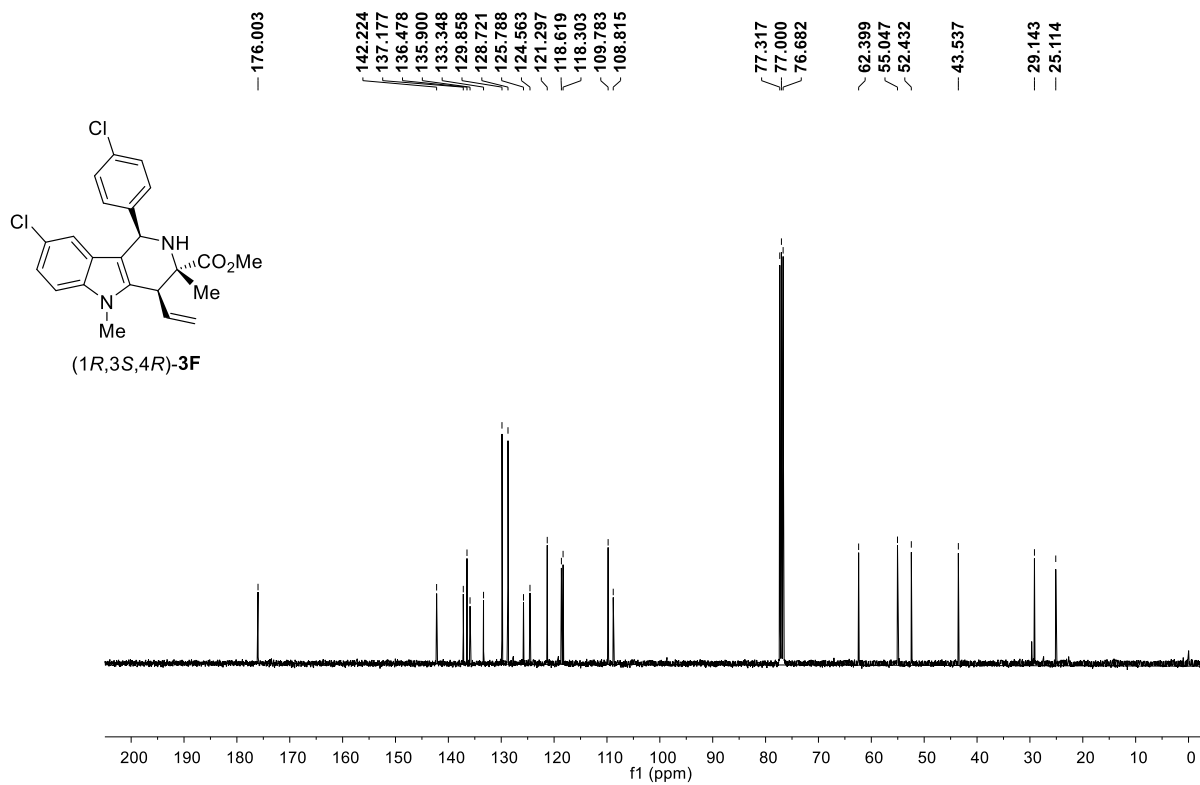

Supplementary Figure 98. <sup>13</sup>C NMR spectrum of (1R,3S,4R)-3F

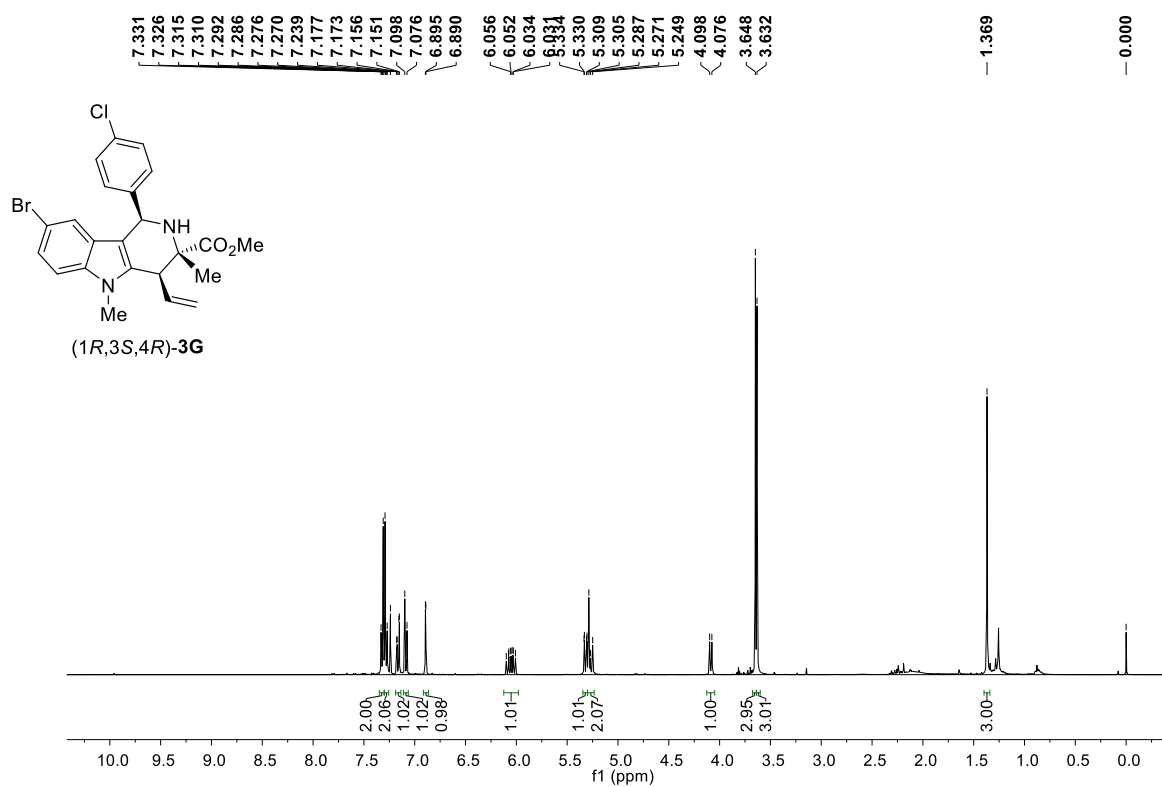

Supplementary Figure 99. <sup>1</sup>H NMR spectrum of (1*R*,3*S*,4*R*)-**3G**

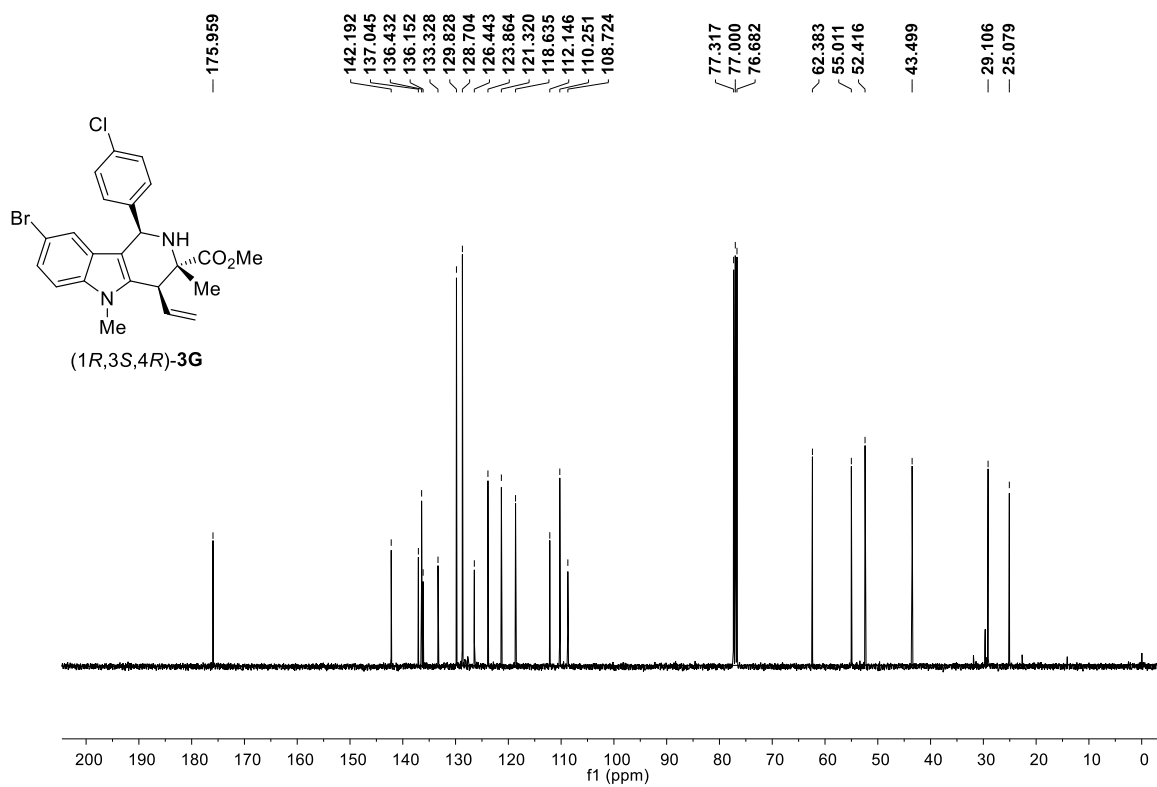

Supplementary Figure 100. <sup>13</sup>C NMR spectrum of (1*R*,3*S*,4*R*)-**3G**

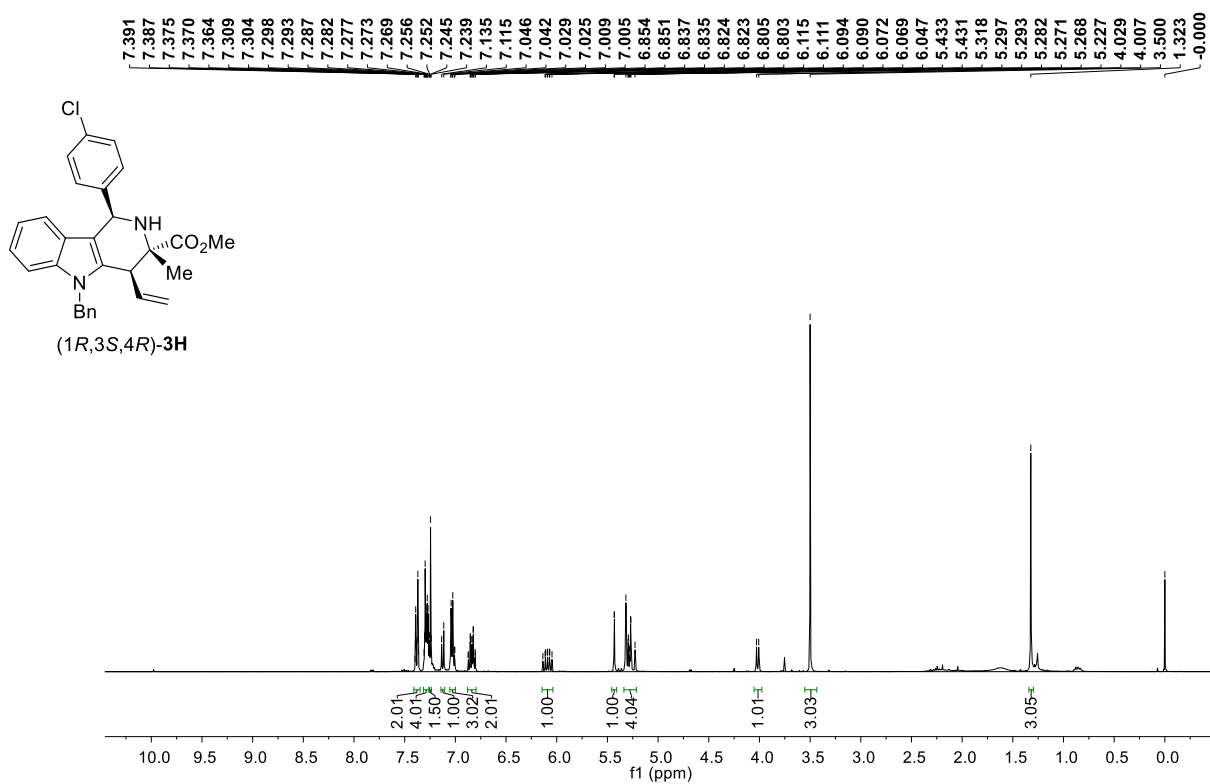

Supplementary Figure 101. <sup>1</sup>H NMR spectrum of (1*R*,3*S*,4*R*)-**3H**

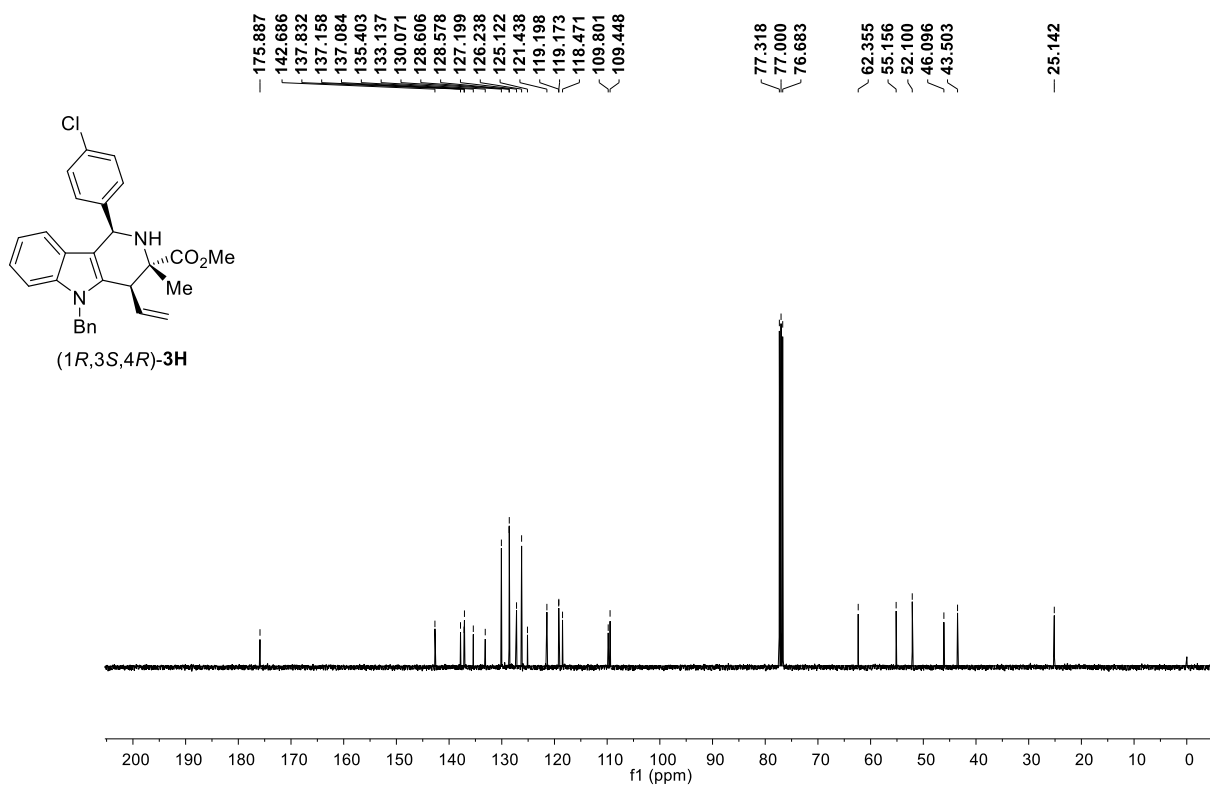

Supplementary Figure 102. <sup>13</sup>C NMR spectrum of (1*R*,3*S*,4*R*)-**3H**

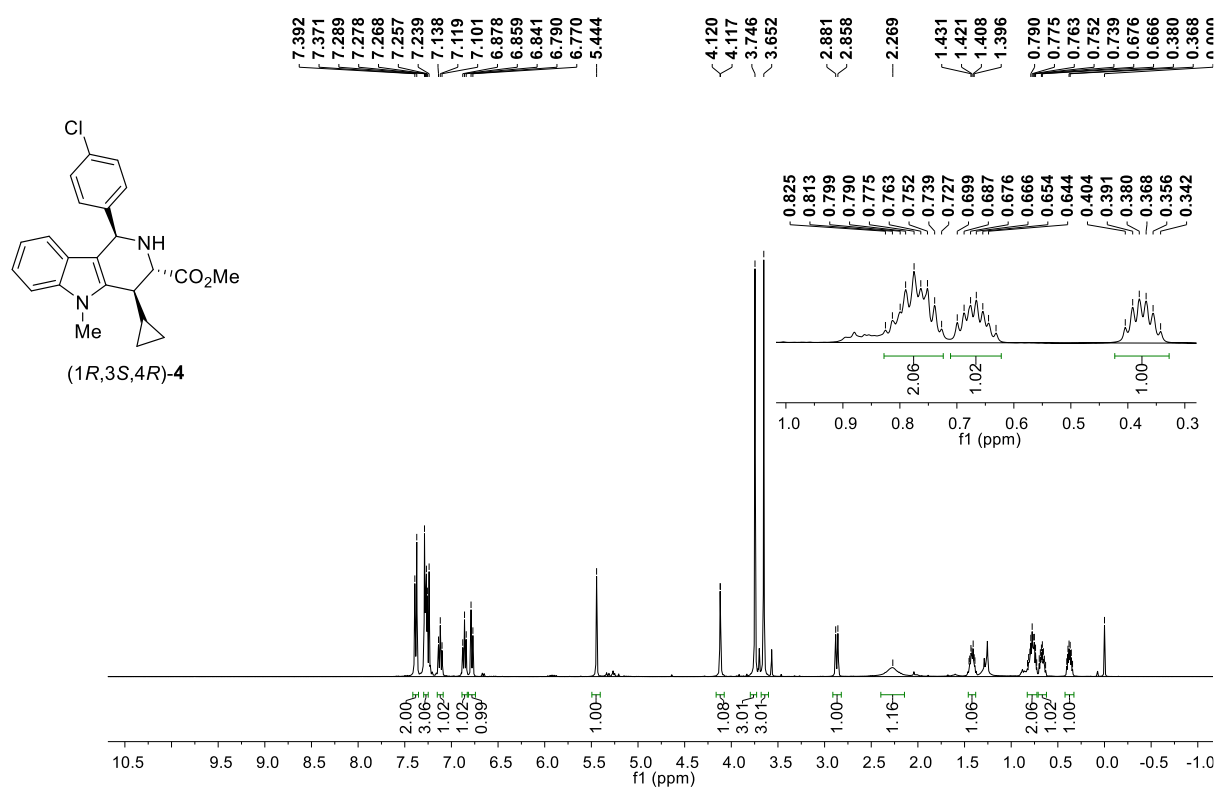

Supplementary Figure 103. <sup>1</sup>H NMR spectrum of (1*R*,3*S*,4*R*)-4

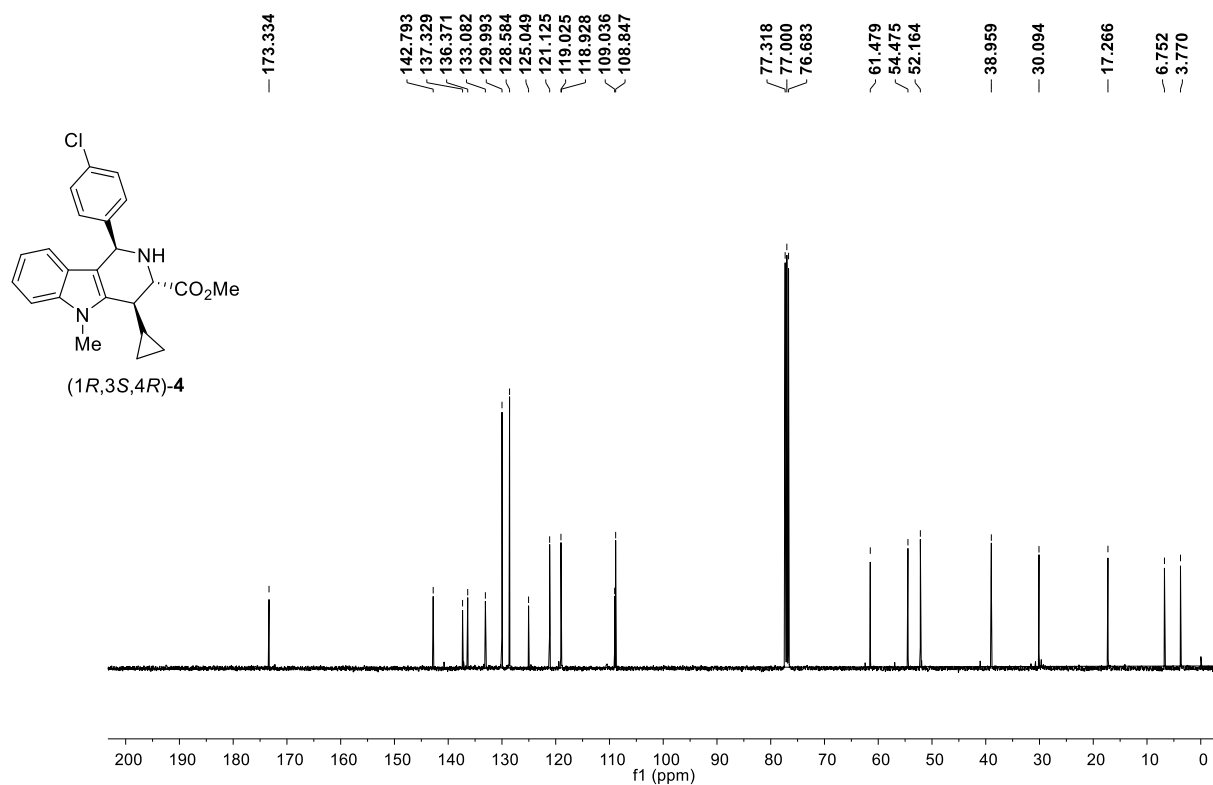

Supplementary Figure 104. <sup>13</sup>C NMR spectrum of (1*R*,3*S*,4*R*)-4

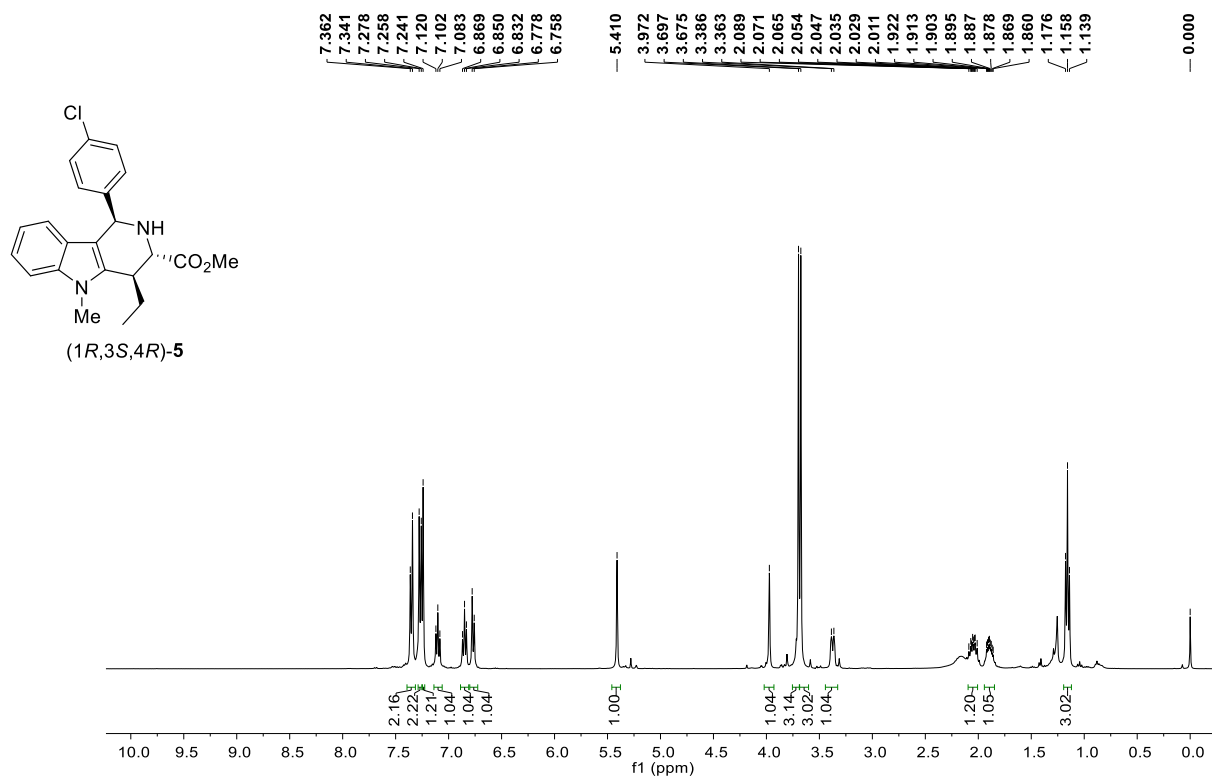

Supplementary Figure 105. <sup>1</sup>H NMR spectrum of (1*R*,3*S*,4*R*)-5

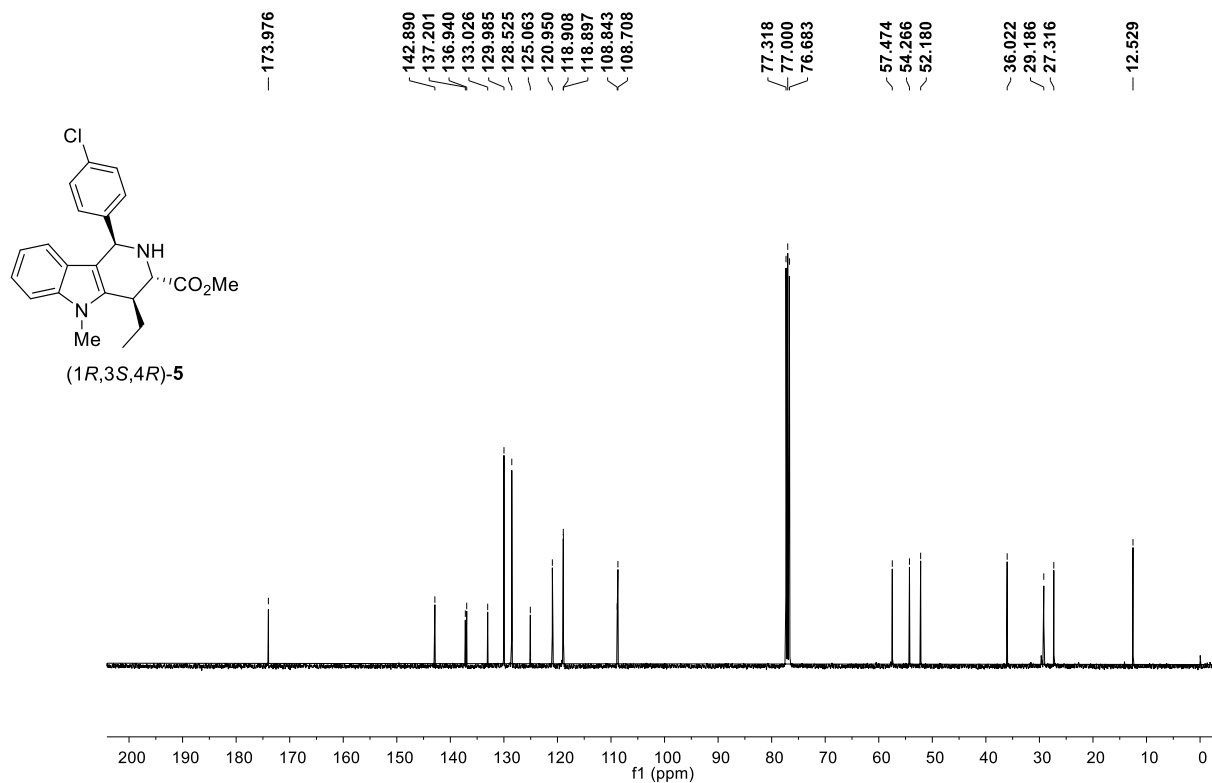

Supplementary Figure 106. <sup>13</sup>C NMR spectrum of (1*R*,3*S*,4*R*)-5

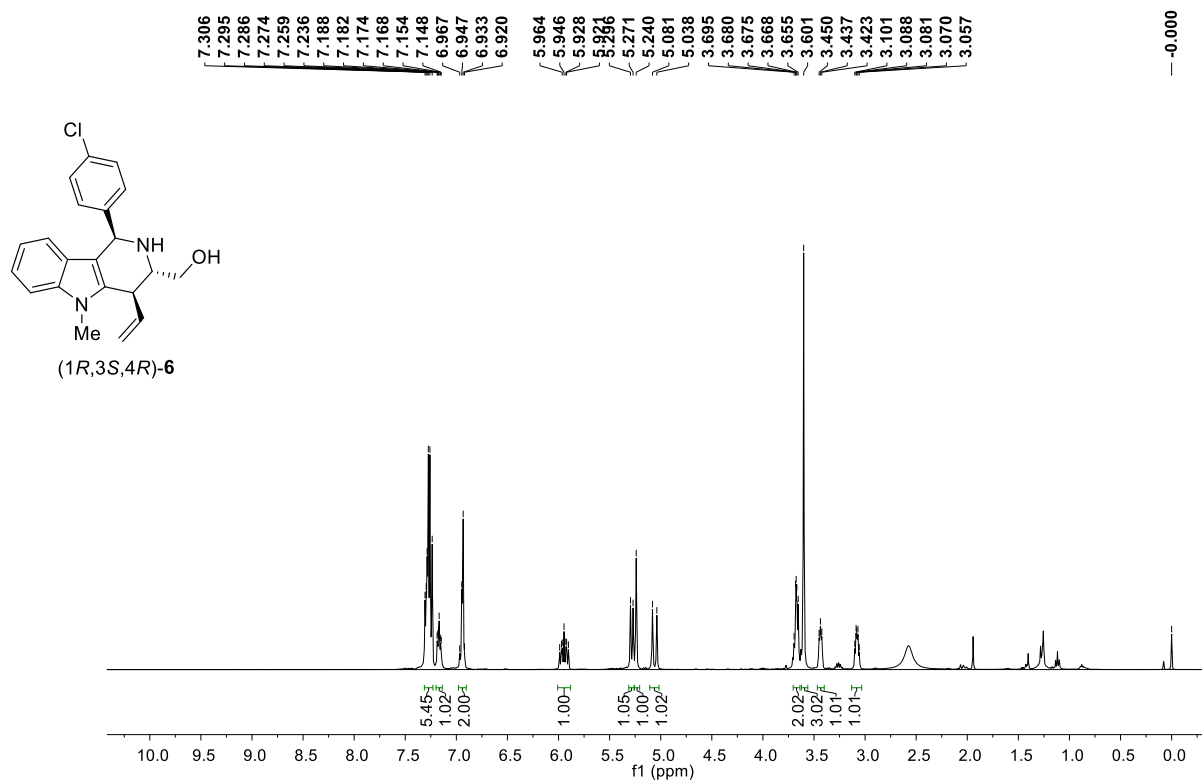

Supplementary Figure 107. <sup>1</sup>H NMR spectrum of (1*R*,3*S*,4*R*)-6

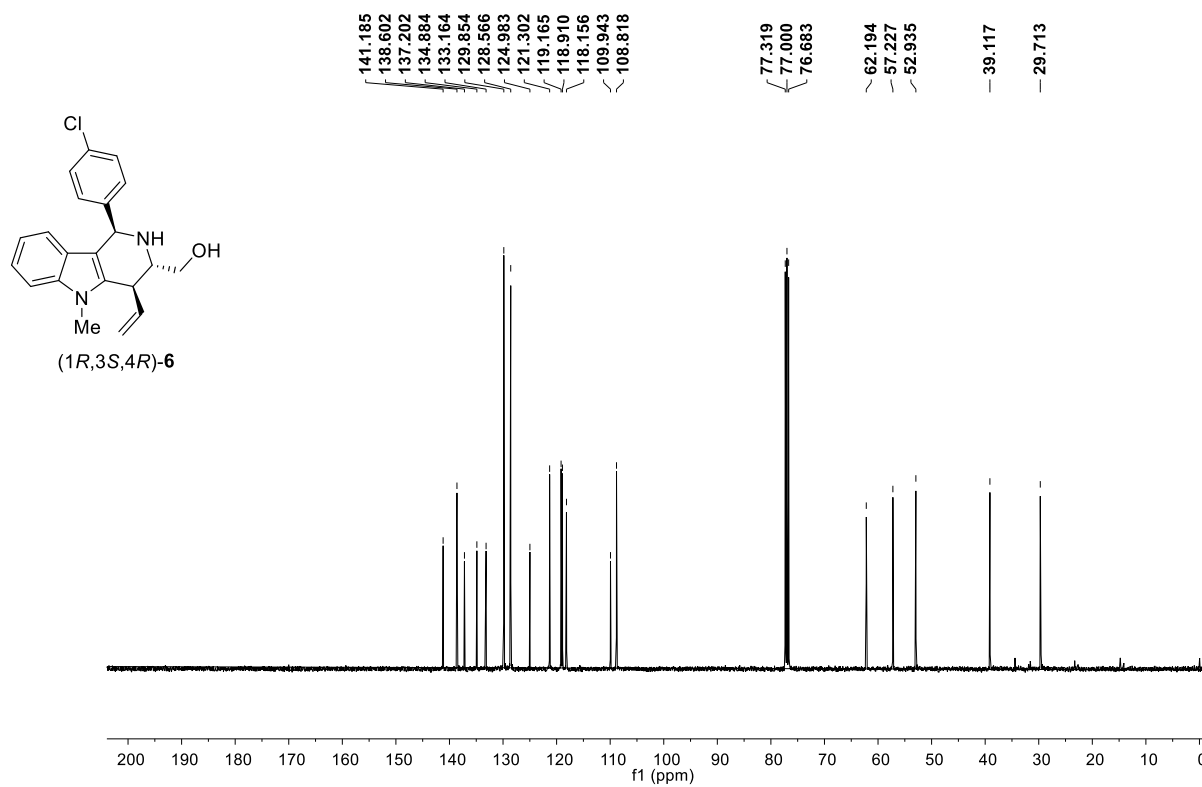

Supplementary Figure 108. <sup>13</sup>C NMR spectrum of (1*R*,3*S*,4*R*)-6

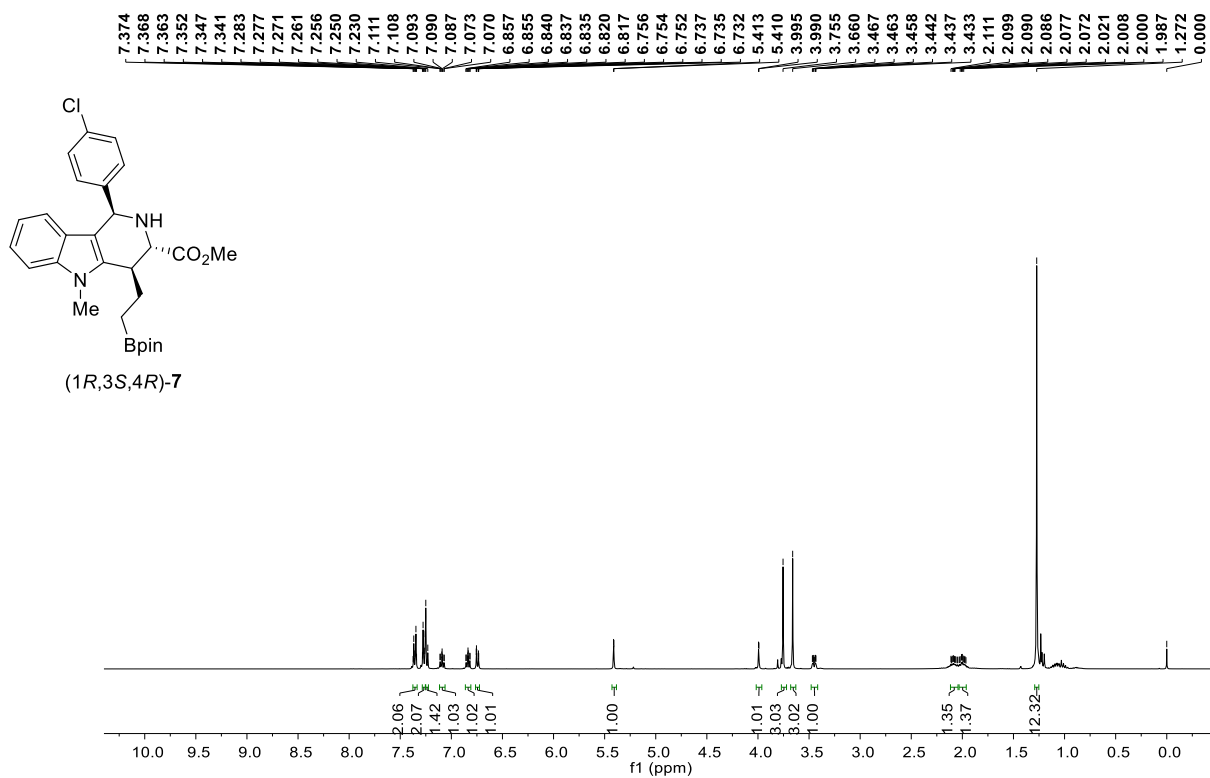

Supplementary Figure 109. <sup>1</sup>H NMR spectrum of (1*R*,3*S*,4*R*)-7

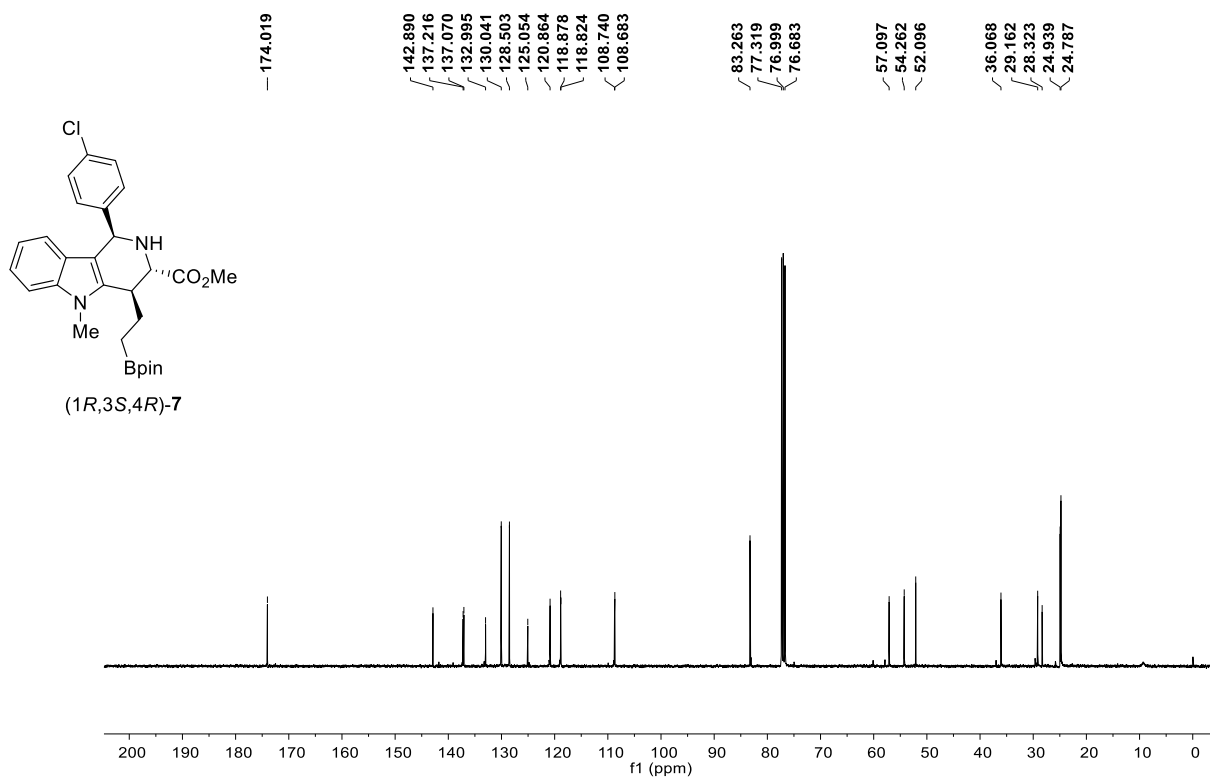

Supplementary Figure 110. <sup>13</sup>C NMR spectrum of (1*R*,3*S*,4*R*)-7

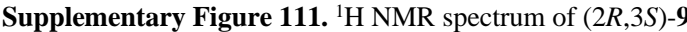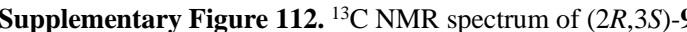

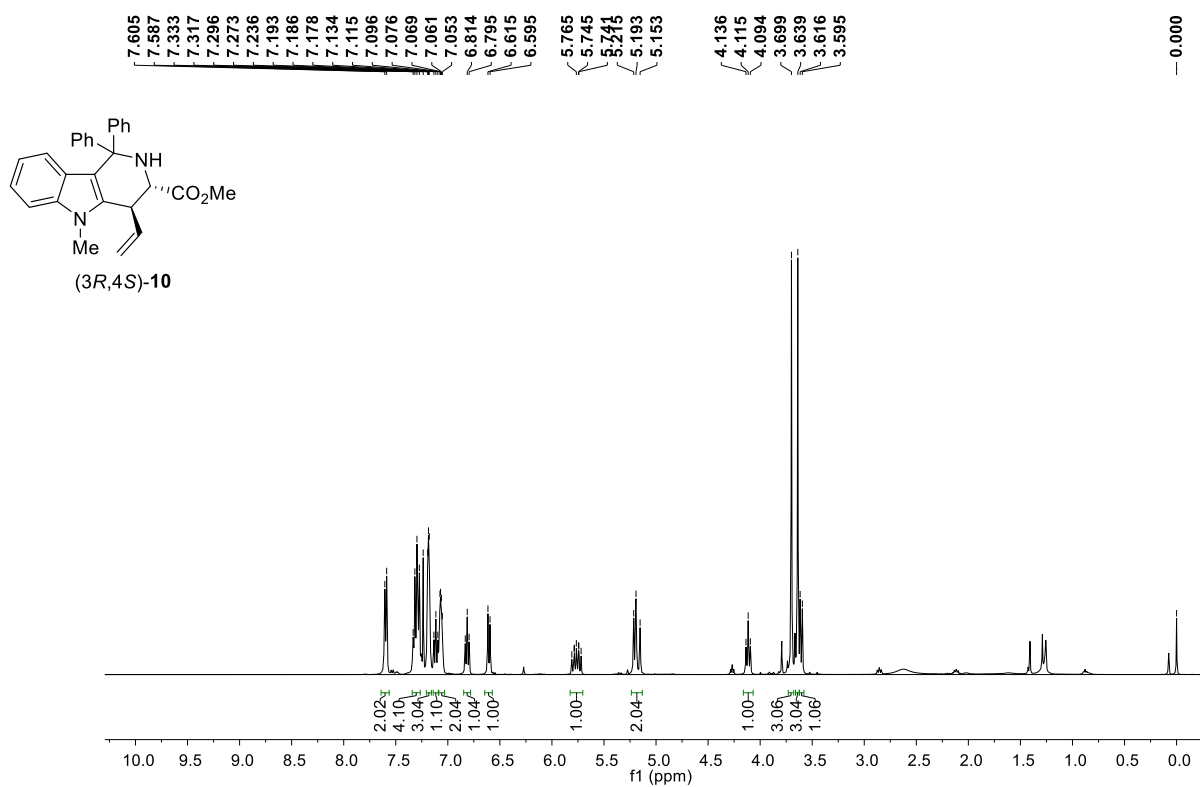

Supplementary Figure 113. <sup>1</sup>H NMR spectrum of (3*R*,4*S*)-10

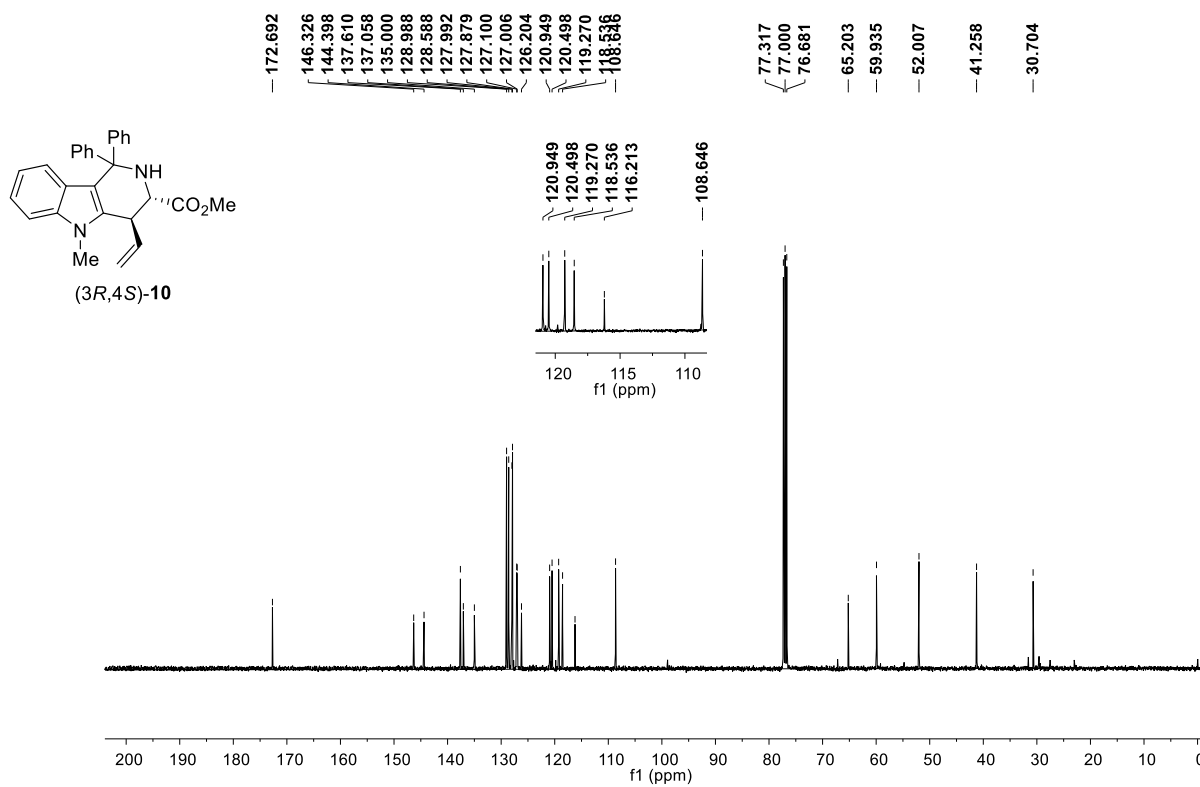

Supplementary Figure 114. <sup>13</sup>C NMR spectrum of (3*R*,4*S*)-10

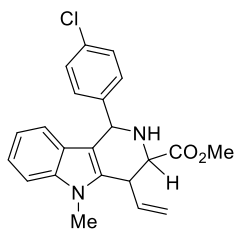

(1*R*\*,3*S*\*,4*R*\*)-3a and (1*R*\*,3*R*\*,4*R*\*)-3a

Data File E:\DATA\XSM...109 03-150 4-Cl-aH div 2018-11-09 11-51-40\XSM 181109 4-Cl-aH div.D  
Sample Name: In33 03-132 4-Cl-aH rac 4peak

```
=====
Acq. Operator   : SYSTEM                      Seq. Line :    1
Acq. Instrument : 1260                      Location  :    70
Injection Date  : 11/9/2018 11:53:13 AM      Inj       :    1
                                           Inj Volume: 5.000 µl
Acq. Method     : E:\DATA\XSM-In33\In33 181109 03-150 4-Cl-aH div 2018-11-09 11-51-40\In33 AD
                  -98-40min-282nm 4-Cl-aH div.M
Last changed    : 11/9/2018 11:51:40 AM by SYSTEM
Analysis Method : E:\DATA\XSM-In33\In33 181109 03-150 4-Cl-aH div 2018-11-09 11-51-40\In33 AD
                  -98-40min-282nm 4-Cl-aH div.M (Sequence Method)
Last changed    : 12/15/2018 4:00:28 PM by SYSTEM
                  (modified after loading)
Additional Info : Peak(s) manually integrated
```

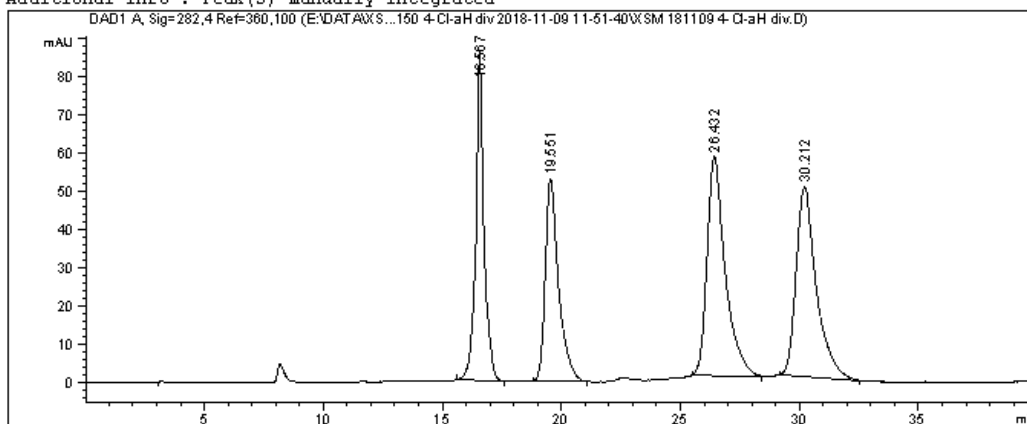

#### Area Percent Report

```
Sorted By      : Signal
Multiplier     : 1.0000
Dilution       : 1.0000
Do not use Multiplier & Dilution Factor with ISTDs
```

Signal 1: DAD1 A, Sig=282,4 Ref=360,100

| Peak # | RetTime [min] | Type | Width [min] | Area [mAU*s] | Height [mAU] | Area %  |
|--------|---------------|------|-------------|--------------|--------------|---------|
| 1      | 16.567        | BB   | 0.3229      | 2027.34363   | 85.74043     | 20.2577 |
| 2      | 19.551        | BB   | 0.5368      | 2050.67627   | 52.83966     | 20.4908 |
| 3      | 26.432        | BB   | 0.6670      | 3013.78735   | 57.26770     | 30.1145 |
| 4      | 30.212        | BB   | 0.7057      | 2915.95898   | 49.61451     | 29.1370 |

Totals : 1.00078e4 245.46230

\*\*\* End of Report \*\*\*

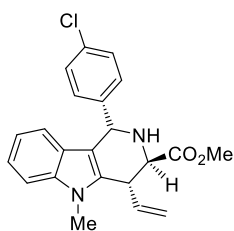

(1S,3R,4S)-3a

Data File E:\DATA\XSM...0316 04-48 4-Cl-aH div lp and 3p 2019-03-16 20-35-15\XSM 20190316.D  
Sample Name: In33 04-48 4-Cl-aH S+D div

```
=====
Acq. Operator   : SYSTEM                      Seq. Line :    1
Acq. Instrument : 1260                      Location  :   69
Injection Date  : 3/16/2019 8:36:45 PM        Inj       :    1
                                           Inj Volume: 5.000 µl
Acq. Method     : E:\DATA\XSM\In33 190316 04-48 4-Cl-aH div lp and 3p 2019-03-16 20-35-15
                  \In33 AD-98-40min-282nm 4-Cl-aH div.M
Last changed    : 3/16/2019 8:35:15 PM by SYSTEM
Analysis Method : E:\DATA\XSM\In33 190316 04-48 4-Cl-aH div lp and 3p 2019-03-16 20-35-15
                  \In33 AD-98-40min-282nm 4-Cl-aH div.M (Sequence Method)
Last changed    : 3/16/2019 10:23:57 PM by SYSTEM
                  (modified after loading)
Additional Info : Peak(s) manually integrated
```

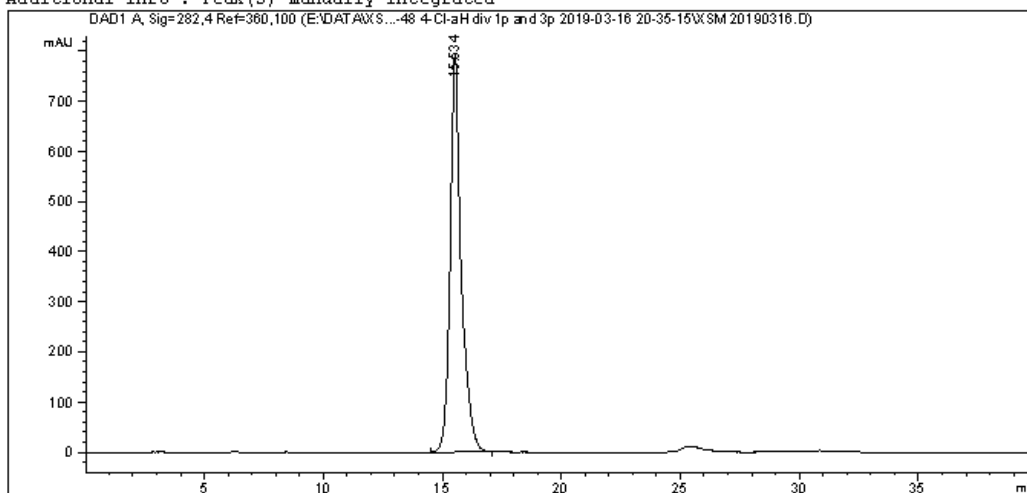

=====  
Area Percent Report  
=====

```
Sorted By      :      Signal
Multiplier     :      1.0000
Dilution       :      1.0000
Do not use Multiplier & Dilution Factor with ISTDs
```

Signal 1: DAD1 A, Sig=282,4 Ref=360,100

| Peak # | RetTime [min] | Type | Width [min] | Area [mAU*s] | Height [mAU] | Area %   |
|--------|---------------|------|-------------|--------------|--------------|----------|
| 1      | 15.534        | BB   | 0.4477      | 2.55505e4    | 791.22150    | 100.0000 |

Totals :                    2.55505e4    791.22150

=====  
\*\*\* End of Report \*\*\*

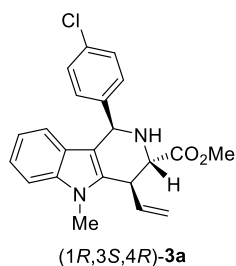

Data File E:\DATA\XS...09 03-150 4-Cl-aH div 2018-11-09 11-51-40\XSM 181109 4-Cl-aH div1.D  
 Sample Name: In33 03-146 4-Cl-aH R+L opt

```
=====
Acq. Operator   : SYSTEM                      Seq. Line :    2
Acq. Instrument : 1260                      Location  :   66
Injection Date  : 11/9/2018 12:34:43 PM      Inj       :    1
                                           Inj Volume: 5.000 µl
Acq. Method     : E:\DATA\XSM-In33\In33 181109 03-150 4-Cl-aH div 2018-11-09 11-51-40\In33 AD
                  -98-40min-282nm 4-Cl-aH div.M
Last changed    : 11/9/2018 11:51:40 AM by SYSTEM
Analysis Method : E:\DATA\XSM-In33\In33 181109 03-150 4-Cl-aH div 2018-11-09 11-51-40\In33 AD
                  -98-40min-282nm 4-Cl-aH div.M (Sequence Method)
Last changed    : 1/2/2019 4:46:24 PM by SYSTEM
                  (modified after loading)
=====
```

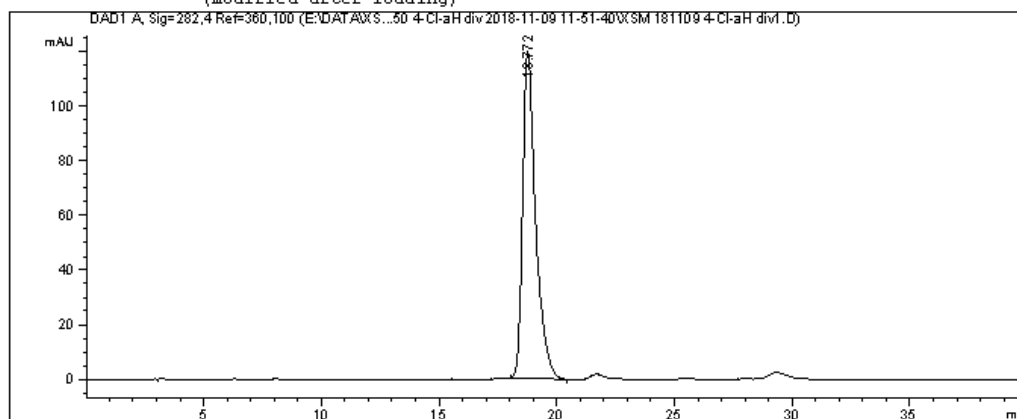

```
=====
                          Area Percent Report
=====
```

```
Sorted By      :      Signal
Multiplier     :      1.0000
Dilution       :      1.0000
Do not use Multiplier & Dilution Factor with ISTDs
```

Signal 1: DAD1 A, Sig=282,4 Ref=360,100

| Peak # | RetTime [min] | Type | Width [min] | Area [mAU*s] | Height [mAU] | Area %   |
|--------|---------------|------|-------------|--------------|--------------|----------|
| 1      | 18.772        | BB   | 0.5548      | 4565.13135   | 119.72671    | 100.0000 |

Totals :                      4565.13135   119.72671

```
=====
*** End of Report ***
=====
```

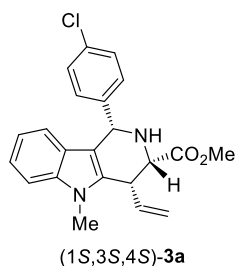

Data File E:\DATA\XS...316 04-48 4-Cl-aH div lp and 3p 2019-03-16 20-35-15\XSM 201903161.D  
Sample Name: In33 04-48 4-Cl-aH S+L div

```
=====
Acq. Operator   : SYSTEM                      Seq. Line :    2
Acq. Instrument : 1260                      Location  :    70
Injection Date  : 3/16/2019 9:18:12 PM       Inj       :    1
                                           Inj Volume: 5.000 µl
Acq. Method     : E:\DATA\XSM\In33 190316 04-48 4-Cl-aH div lp and 3p 2019-03-16 20-35-15
                  \In33 AD-98-40min-282nm 4-Cl-aH div.M
Last changed    : 3/16/2019 8:35:15 PM by SYSTEM
Analysis Method : E:\DATA\XSM\In33 190316 04-48 4-Cl-aH div lp and 3p 2019-03-16 20-35-15
                  \In33 AD-98-40min-282nm 4-Cl-aH div.M (Sequence Method)
Last changed    : 3/16/2019 10:23:57 PM by SYSTEM
                  (modified after loading)
Additional Info : Peak(s) manually integrated
```

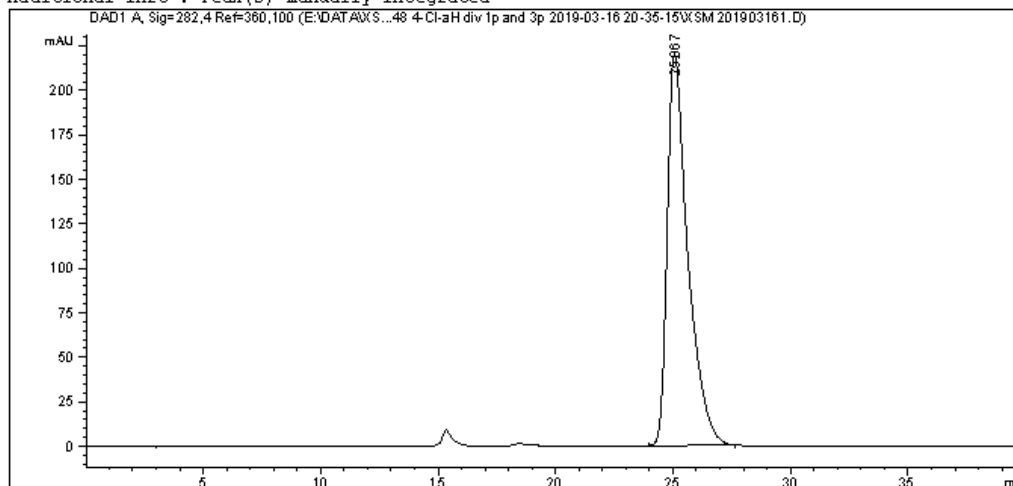

#### Area Percent Report

```
Sorted By      :      Signal
Multiplier     :      1.0000
Dilution       :      1.0000
Do not use Multiplier & Dilution Factor with ISTDs
```

Signal 1: DAD1 A, Sig=282,4 Ref=360,100

| Peak # | RetTime [min] | Type | Width [min] | Area [mAU*s] | Height [mAU] | Area %   |
|--------|---------------|------|-------------|--------------|--------------|----------|
| 1      | 25.067        | BB   | 0.7977      | 1.34526e4    | 220.50945    | 100.0000 |

Totals : 1.34526e4 220.50945

\*\*\* End of Report \*\*\*

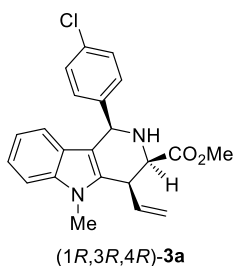

Data File E:\DATA\XS...0110 03-04 4-Cl 4-Cl-aH 23Me-aH 2019-01-10 22-19-30\XSM 201901103.D  
 Sample Name: In33 03-150 4-Cl-aH R+D opt

```
=====
Acq. Operator   : SYSTEM                      Seq. Line :    4
Acq. Instrument : 1260                      Location  :   60
Injection Date  : 1/10/2019 11:39:18 PM      Inj       :    1
                                           Inj Volume: 5.000 µl

Acq. Method     : E:\DATA\XSM\In33 190110 03-04 4-Cl 4-Cl-aH 23Me-aH 2019-01-10 22-19-30\In33
                  AD-98-40min-282nm 4-Cl-aH div.M
Last changed    : 1/10/2019 10:19:31 PM by SYSTEM
Analysis Method : E:\DATA\XSM\In33 190110 03-04 4-Cl 4-Cl-aH 23Me-aH 2019-01-10 22-19-30\In33
                  AD-98-40min-282nm 4-Cl-aH div.M (Sequence Method)
Last changed    : 1/11/2019 11:57:28 AM by SYSTEM
                  (modified after loading)
Additional Info : Peak(s) manually integrated
```

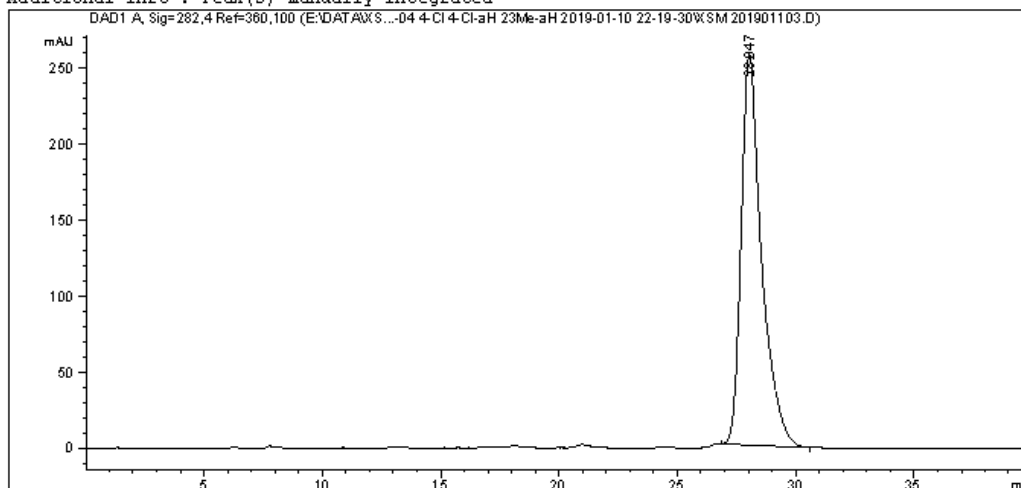

# Area Percent Report

```
Sorted By      : Signal
Multiplier     : 1.0000
Dilution       : 1.0000
Do not use Multiplier & Dilution Factor with ISTDs
```

Signal 1: DAD1 A, Sig=282,4 Ref=360,100

| Peak # | RetTime [min] | Type | Width [min] | Area [mAU*s] | Height [mAU] | Area %   |
|--------|---------------|------|-------------|--------------|--------------|----------|
| 1      | 28.047        | BV R | 0.8224      | 1.53992e4    | 257.24072    | 100.0000 |

Totals : 1.53992e4 257.24072

\*\*\* End of Report \*\*\*

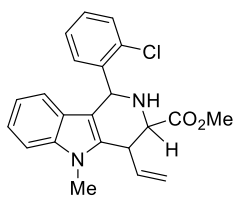

(1R\*,3S\*,4R\*)-3b

Data File E:\DATA\XS...230 04-12 2Cl-23Me-5Mein-aH 1st 2018-12-30 17-30-14\XSM 201812303.D  
Sample Name: In33 04-12 2-Cl-aH 1st rac

```
=====
Acq. Operator   : SYSTEM                      Seq. Line :    4
Acq. Instrument : 1260                      Location  :   70
Injection Date  : 12/30/2018 7:04:04 PM      Inj       :    1
                                           Inj Volume: 5.000 µl
Acq. Method     : E:\DATA\XSM\In33 181230 04-12 2Cl-23Me-5Mein-aH 1st 2018-12-30 17-30-14
                  \In33 AD-98-234nm-30min 2Cl-23Me-aH.M
Last changed    : 12/30/2018 5:30:15 PM by SYSTEM
Analysis Method : E:\DATA\XSM\In33 181230 04-12 2Cl-23Me-5Mein-aH 1st 2018-12-30 17-30-14
                  \In33 AD-98-234nm-30min 2Cl-23Me-aH.M (Sequence Method)
Last changed    : 1/2/2019 11:08:05 AM by SYSTEM
                  (modified after loading)
Additional Info : Peak(s) manually integrated
```

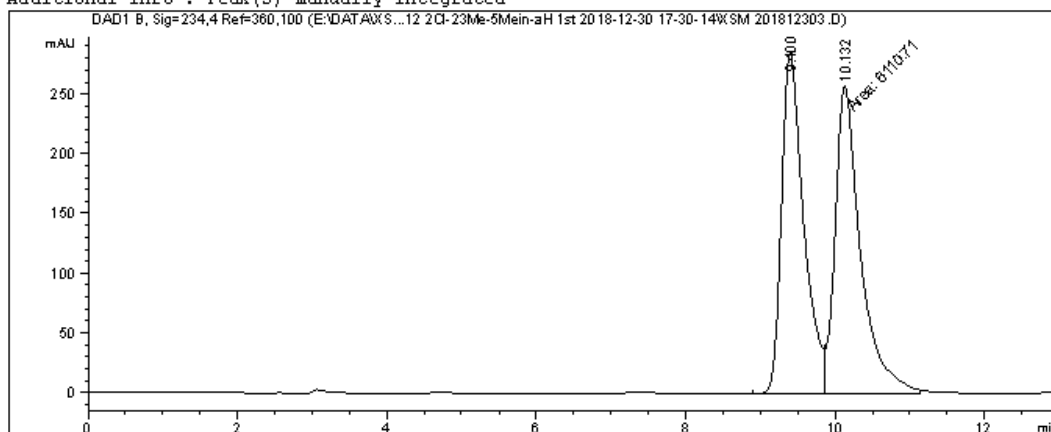

# Area Percent Report

```
Sorted By      : Signal
Multiplier     : 1.0000
Dilution      : 1.0000
Do not use Multiplier & Dilution Factor with ISTDs
```

Signal 1: DAD1 B, Sig=234,4 Ref=360,100

| Peak # | RetTime [min] | Type | Width [min] | Area [mAU*s] | Height [mAU] | Area %  |
|--------|---------------|------|-------------|--------------|--------------|---------|
| 1      | 9.400         | BV   | 0.3089      | 5894.23633   | 285.41483    | 49.0984 |
| 2      | 10.132        | MF   | 0.3953      | 6110.70654   | 257.61252    | 50.9016 |

Totals : 1.20049e4 543.02734

\*\*\* End of Report \*\*\*

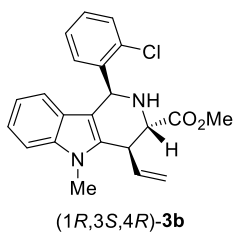

Data File E:\DATA\XS...230 04-12 2Cl-23Me-5Mein-aH 1st 2018-12-30 17-30-14\XSM 201812302.D  
Sample Name: In33 04-12 2-Cl-aH R+L opt

```
=====
Acq. Operator   : SYSTEM                      Seq. Line :    3
Acq. Instrument : 1260                      Location  :   69
Injection Date  : 12/30/2018 6:33:08 PM      Inj       :    1
                                           Inj Volume: 5.000 µl

Acq. Method     : E:\DATA\XSM\In33 181230 04-12 2Cl-23Me-5Mein-aH 1st 2018-12-30 17-30-14
                  \In33 AD-98-234nm-30min 2Cl-23Me-aH.M
Last changed    : 12/30/2018 5:30:15 PM by SYSTEM
Analysis Method : E:\DATA\XSM\In33 181230 04-12 2Cl-23Me-5Mein-aH 1st 2018-12-30 17-30-14
                  \In33 AD-98-234nm-30min 2Cl-23Me-aH.M (Sequence Method)
Last changed    : 1/2/2019 11:08:05 AM by SYSTEM
                  (modified after loading)
Additional Info : Peak(s) manually integrated
```

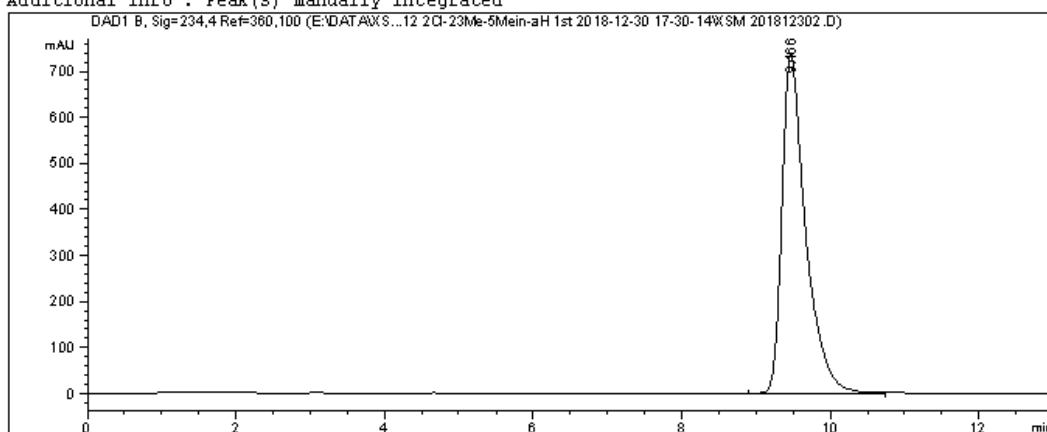

```
=====
                          Area Percent Report
=====
```

```
Sorted By      :      Signal
Multiplier     :      1.0000
Dilution       :      1.0000
Do not use Multiplier & Dilution Factor with ISTDs
```

Signal 1: DAD1 B, Sig=234,4 Ref=360,100

| Peak # | RetTime [min] | Type | Width [min] | Area [mAU*s] | Height [mAU] | Area %   |
|--------|---------------|------|-------------|--------------|--------------|----------|
| 1      | 9.466         | BB   | 0.3260      | 1.62327e4    | 734.15625    | 100.0000 |

Totals :                    1.62327e4    734.15625

```
=====
*** End of Report ***
```

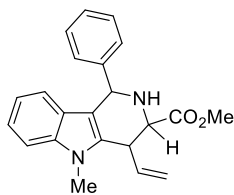

(1R\*,3S\*,4R\*)-3c and (1R\*,3R\*,4R\*)-3c

Data File E:\DATA\XS...3 181123 03-150 XSM Ph-aH 4p div 2018-11-17 20-06-32\XSM 20181123.D  
Sample Name: In33 03-151 Ph-aH rac 4peak

```
=====
Acq. Operator   : SYSTEM                      Seq. Line :    1
Acq. Instrument : 1260                      Location  :   70
Injection Date  : 11/17/2018 8:08:06 PM      Inj       :    1
                                           Inj Volume: 5.000 µl
Acq. Method     : E:\DATA\XSM-In33\In33 181123 03-150 XSM Ph-aH 4p div 2018-11-17 20-06-32
                  \In33 1st AD-98-40min-232nm Ph-aH 4p.M
Last changed    : 11/17/2018 8:06:32 PM by SYSTEM
Analysis Method : E:\DATA\XSM-In33\In33 181123 03-150 XSM Ph-aH 4p div 2018-11-17 20-06-32
                  \In33 1st AD-98-40min-232nm Ph-aH 4p.M (Sequence Method)
Last changed    : 12/15/2018 4:06:38 PM by SYSTEM
                  (modified after loading)
Additional Info : Peak(s) manually integrated
```

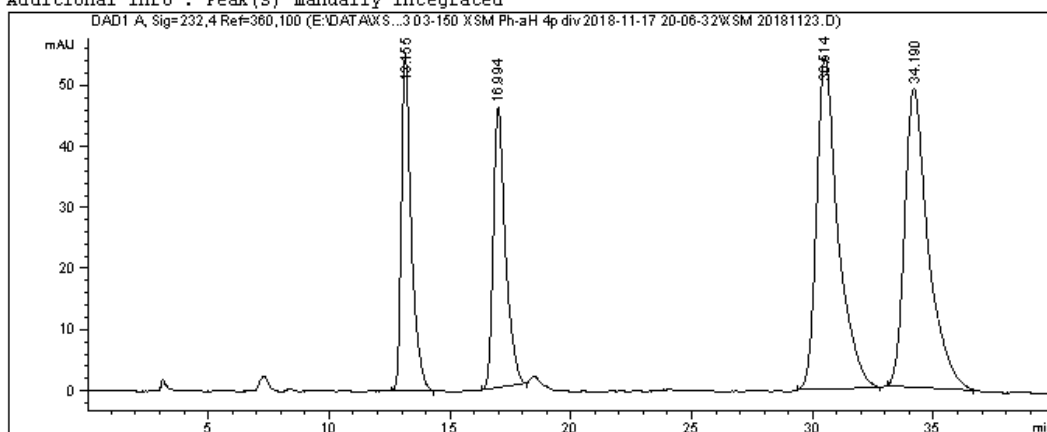

=====  
Area Percent Report  
=====

Sorted By : Signal  
Multiplier : 1.0000  
Dilution : 1.0000  
Do not use Multiplier & Dilution Factor with ISTDs

Signal 1: DAD1 A, Sig=232,4 Ref=360,100

| Peak # | RetTime [min] | Type | Width [min] | Area [mAU*s] | Height [mAU] | Area %  |
|--------|---------------|------|-------------|--------------|--------------|---------|
| 1      | 13.155        | BB   | 0.4108      | 1564.10522   | 54.99319     | 15.9201 |
| 2      | 16.994        | BB   | 0.4881      | 1607.36499   | 45.83415     | 16.3604 |
| 3      | 30.514        | BB   | 0.7361      | 3354.70581   | 54.20038     | 34.1455 |
| 4      | 34.190        | BB   | 0.7916      | 3298.55615   | 48.92328     | 33.5740 |

Totals : 9824.73218 203.95100

=====  
\*\*\* End of Report \*\*\*

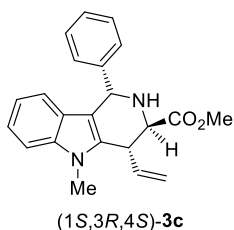

Data File E:\DATA\XS... 181123 03-150 XSM Ph-aH 4p div 2018-11-17 20-06-32\XSM 201811231.D  
 Sample Name: In33 03-150 Ph-aH S+D opt

```
=====
Acq. Operator   : SYSTEM                      Seq. Line :    2
Acq. Instrument : 1260                      Location  :   66
Injection Date  : 11/17/2018 8:49:36 PM      Inj       :    1
                                           Inj Volume: 5.000 µl
Acq. Method     : E:\DATA\XSM-In33\In33 181123 03-150 XSM Ph-aH 4p div 2018-11-17 20-06-32
                  \In33 1st AD-98-40min-232nm Ph-aH 4p.M
Last changed    : 11/17/2018 8:06:32 PM by SYSTEM
Analysis Method : E:\DATA\XSM-In33\In33 181123 03-150 XSM Ph-aH 4p div 2018-11-17 20-06-32
                  \In33 1st AD-98-40min-232nm Ph-aH 4p.M (Sequence Method)
Last changed    : 1/2/2019 3:43:23 PM by SYSTEM
                  (modified after loading)
Additional Info : Peak(s) manually integrated
```

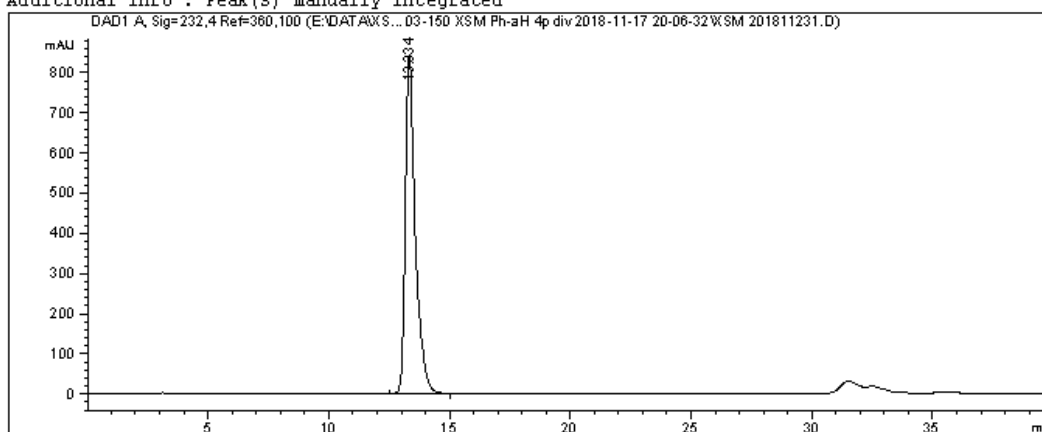

```
=====
                          Area Percent Report
=====
```

```
Sorted By      :      Signal
Multiplier     :      1.0000
Dilution       :      1.0000
Do not use Multiplier & Dilution Factor with ISTDs
```

Signal 1: DAD1 A, Sig=232,4 Ref=360,100

| Peak # | RetTime [min] | Type | Width [min] | Area [mAU*s] | Height [mAU] | Area %   |
|--------|---------------|------|-------------|--------------|--------------|----------|
| 1      | 13.334        | BB   | 0.4151      | 2.39905e4    | 842.88348    | 100.0000 |

Totals :                    2.39905e4    842.88348

```
=====
*** End of Report ***
```

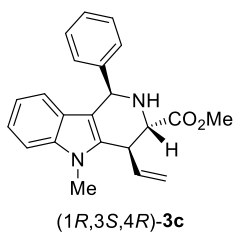

Data File E:\DATA\XSM\In33 181229 03-149 Ph-aH R+L opt 2018-12-29 21-02-33\XSM 20181229.D  
Sample Name: In33 03-149 Ph-aH R+L opt

```
=====
Acq. Operator   : SYSTEM                      Seq. Line :    1
Acq. Instrument : 1260                      Location  :   70
Injection Date  : 12/29/2018 9:04:07 PM      Inj       :    1
                                           Inj Volume: 5.000 µl
Acq. Method     : E:\DATA\XSM\CX-10-139-DCE-2 2018-12-29 21-02-33\In33 1st AD-98-40min-232nm
                                           Ph-aH 4p.M
Last changed    : 12/29/2018 9:02:33 PM by SYSTEM
Analysis Method : E:\DATA\XSM\In33 181229 03-149 Ph-aH R+L opt 2018-12-29 21-02-33\In33 1st
                                           AD-98-40min-232nm Ph-aH 4p.M (Sequence Method)
Last changed    : 1/2/2019 3:41:15 PM by SYSTEM
                                           (modified after loading)
Additional Info  : Peak(s) manually integrated
```

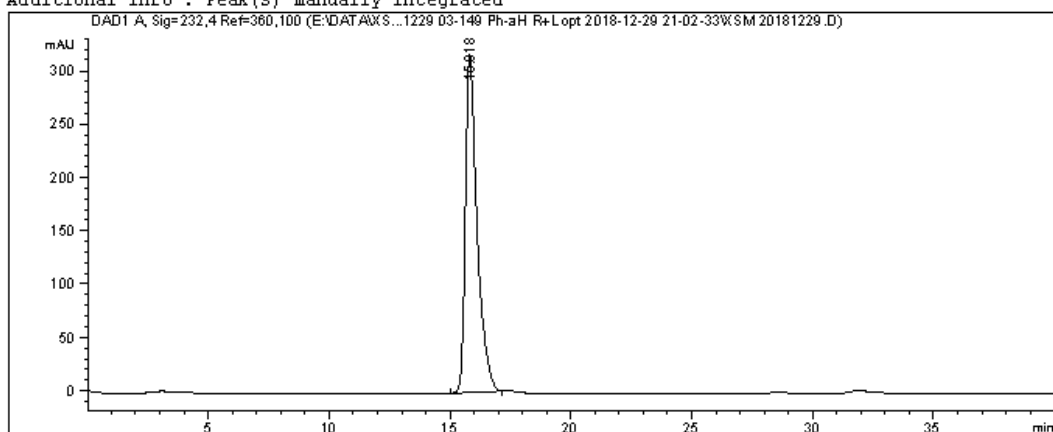

```
=====
                          Area Percent Report
=====
```

```
Sorted By      :      Signal
Multiplier     :      1.0000
Dilution       :      1.0000
Do not use Multiplier & Dilution Factor with ISTDs
```

Signal 1: DAD1 A, Sig=232,4 Ref=360,100

| Peak # | RetTime [min] | Type | Width [min] | Area [mAU*s] | Height [mAU] | Area %   |
|--------|---------------|------|-------------|--------------|--------------|----------|
| 1      | 15.818        | BB   | 0.4923      | 1.06552e4    | 316.86420    | 100.0000 |

Totals : 1.06552e4 316.86420

```
=====
*** End of Report ***
```

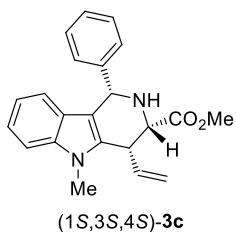

Data File E:\DATA\XSM\In33 181228 03-149 Ph-aH opt 2018-12-28 21-23-57\XSM 20181228.D  
Sample Name: In33 03-149 Ph-aH S+L opt

```
=====
Acq. Operator   : SYSTEM                      Seq. Line :    1
Acq. Instrument : 1260                      Location  :   70
Injection Date  : 12/28/2018 9:25:36 PM      Inj       :    1
                                           Inj Volume: 5.000 µl
Acq. Method     : E:\DATA\XSM\In33 181228 03-149 Ph-aH opt 2018-12-28 21-23-57\In33 1st AD-98
                  -40min-232nm Ph-aH 4p.M
Last changed    : 12/28/2018 9:23:58 PM by SYSTEM
Analysis Method : E:\DATA\XSM\In33 181228 03-149 Ph-aH opt 2018-12-28 21-23-57\In33 1st AD-98
                  -40min-232nm Ph-aH 4p.M (Sequence Method)
Last changed    : 1/2/2019 2:43:34 PM by SYSTEM
                  (modified after loading)
Additional Info : Peak(s) manually integrated
```

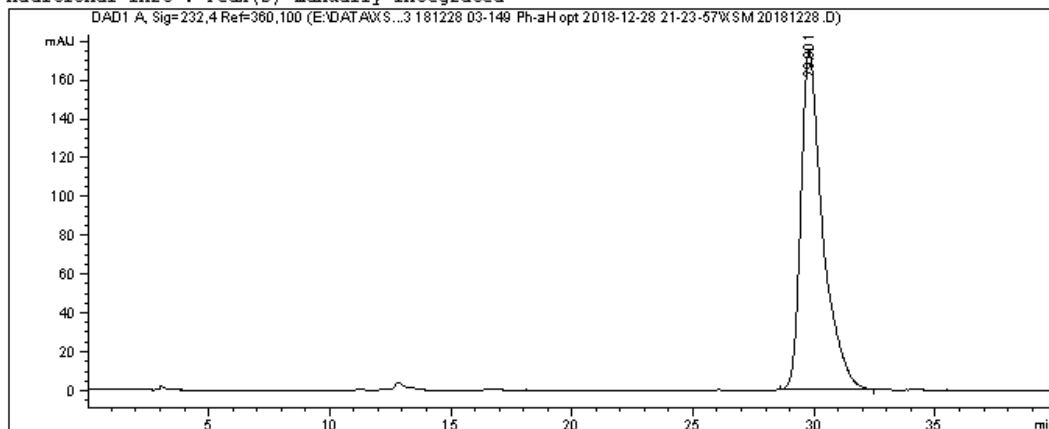

```
=====
                        Area Percent Report
=====
```

```
Sorted By      :      Signal
Multiplier     :      1.0000
Dilution       :      1.0000
Do not use Multiplier & Dilution Factor with ISTDs
```

Signal 1: DAD1 A, Sig=232,4 Ref=360,100

| Peak # | RetTime [min] | Type | Width [min] | Area [mAU*s] | Height [mAU] | Area %   |
|--------|---------------|------|-------------|--------------|--------------|----------|
| 1      | 29.801        | BB   | 0.8268      | 1.09322e4    | 174.52565    | 100.0000 |

Totals :                    1.09322e4   174.52565

```
=====
*** End of Report ***
```

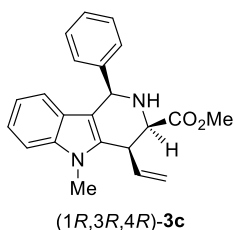

Data File E:\DATA\XS... 181123 03-150 XSM Ph-aH 4p div 2018-11-17 20-06-32\XSM 201811234.D  
Sample Name: In33 03-149 Ph-aH R+D opt

```
=====
Acq. Operator   : SYSTEM                      Seq. Line :    5
Acq. Instrument : 1260                      Location  :   69
Injection Date  : 11/17/2018 10:54:13 PM      Inj       :    1
                                           Inj Volume: 5.000 µl
Acq. Method     : E:\DATA\XSM-In33\In33 181123 03-150 XSM Ph-aH 4p div 2018-11-17 20-06-32
                  \In33 1st AD-98-40min-232nm Ph-aH 4p.M
Last changed    : 11/17/2018 8:06:32 PM by SYSTEM
Analysis Method : E:\DATA\XSM-In33\In33 181123 03-150 XSM Ph-aH 4p div 2018-11-17 20-06-32
                  \In33 1st AD-98-40min-232nm Ph-aH 4p.M (Sequence Method)
Last changed    : 12/15/2018 4:06:38 PM by SYSTEM
                  (modified after loading)
Additional Info : Peak(s) manually integrated
```

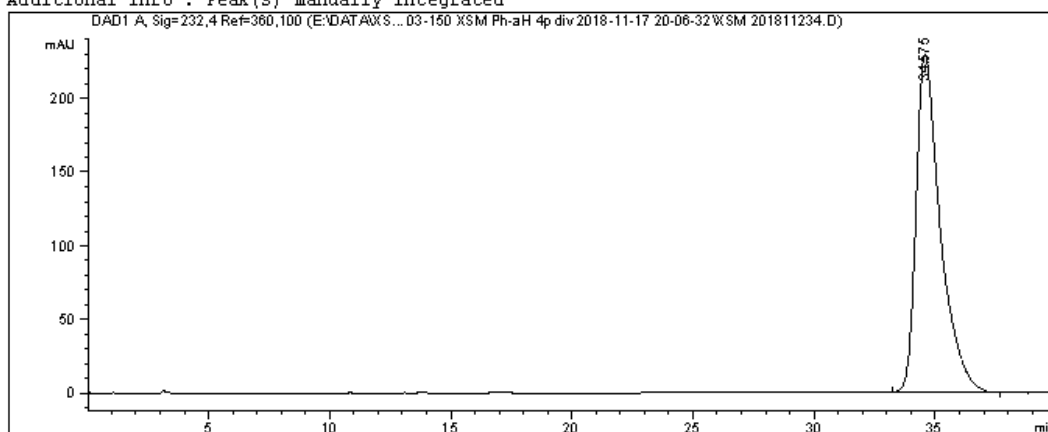

```
=====
                          Area Percent Report
=====
```

```
Sorted By      :      Signal
Multiplier     :      1.0000
Dilution       :      1.0000
Do not use Multiplier & Dilution Factor with ISTDs
```

Signal 1: DAD1 A, Sig=232,4 Ref=360,100

| Peak # | RetTime [min] | Type | Width [min] | Area [mAU*s] | Height [mAU] | Area %   |
|--------|---------------|------|-------------|--------------|--------------|----------|
| 1      | 34.575        | BB   | 0.9312      | 1.59828e4    | 229.29974    | 100.0000 |

Totals : 1.59828e4 229.29974

```
=====
*** End of Report ***
```

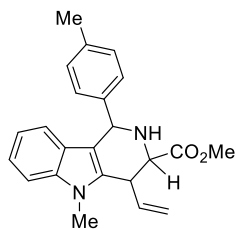

(1*R*\*,3*S*\*,4*R*\*)-3d and (1*R*\*,3*R*\*,4*R*\*)-3d

Data File E:\DATA\XS... 181121 03-151 4-Me-aH 4p 2c div 2018-11-21 21-15-03\XSM-20181121.D  
 Sample Name: In33 03-151 4-Me-aH rac 4peak 2column

```
=====
Acq. Operator   : SYSTEM                      Seq. Line :    1
Acq. Instrument : 1260                      Location  :   60
Injection Date  : 11/21/2018 9:16:37 PM      Inj       :    1
                                           Inj Volume: 20.000 µl
Acq. Method     : E:\DATA\XSM\In33 181121 03-151 4-Me-aH 4p 2c div 2018-11-21 21-15-03\In33
                  AD-98-60min-238 4Me-aH 4p 2c div.M
Last changed    : 11/21/2018 9:15:04 PM by SYSTEM
Analysis Method : E:\DATA\XSM\In33 181121 03-151 4-Me-aH 4p 2c div 2018-11-21 21-15-03\In33
                  AD-98-60min-238 4Me-aH 4p 2c div.M (Sequence Method)
Last changed    : 12/15/2018 3:54:28 PM by SYSTEM
                  (modified after loading)
Additional Info : Peak(s) manually integrated
```

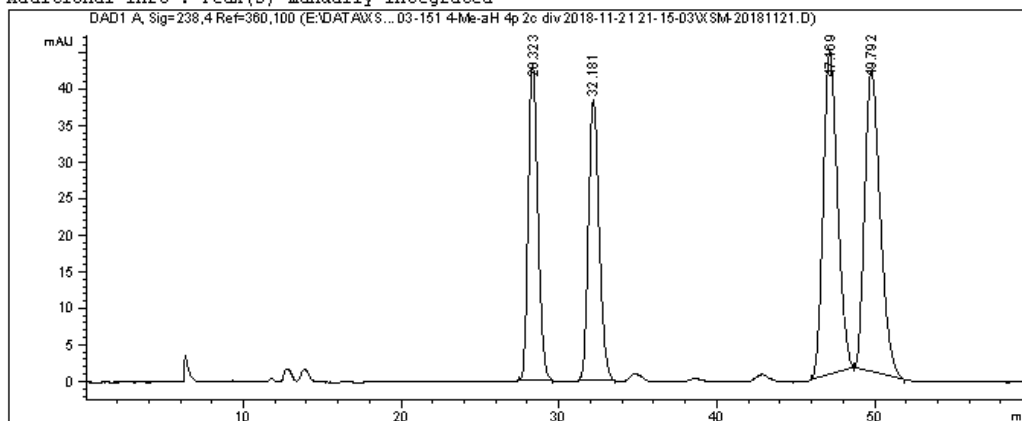

# Area Percent Report

```
Sorted By      : Signal
Multiplier     : 1.0000
Dilution       : 1.0000
Do not use Multiplier & Dilution Factor with ISTDs
```

Signal 1: DAD1 A, Sig=238,4 Ref=360,100

| Peak # | RetTime [min] | Type | Width [min] | Area [mAU*s] | Height [mAU] | Area %  |
|--------|---------------|------|-------------|--------------|--------------|---------|
| 1      | 28.323        | BB   | 0.4936      | 1810.04150   | 43.39978     | 19.6433 |
| 2      | 32.181        | BB   | 0.5757      | 1817.97803   | 38.30616     | 19.7294 |
| 3      | 47.169        | BB   | 0.7524      | 2784.21045   | 44.16994     | 30.2153 |
| 4      | 49.792        | BB   | 0.7995      | 2802.34229   | 41.10054     | 30.4121 |

Totals : 9214.57227 166.97642

\*\*\* End of Report \*\*\*

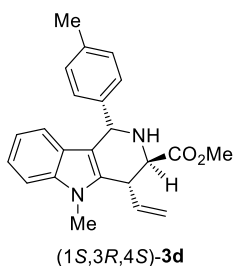

Data File E:\DATA\XS...181121 03-151 4-Me-aH 4p 2c div 2018-11-21 21-15-03\XSM-201811211.D  
Sample Name: In33 03-151 4-Me-aH S+D opt

```
=====
Acq. Operator   : SYSTEM                      Seq. Line :    2
Acq. Instrument : 1260                      Location  :   56
Injection Date  : 11/21/2018 10:18:10 PM      Inj       :    1
                                           Inj Volume: 20.000 µl
Acq. Method     : E:\DATA\XSM\In33 181121 03-151 4-Me-aH 4p 2c div 2018-11-21 21-15-03\In33
                  AD-98-60min-238 4Me-aH 4p 2c div.M
Last changed    : 11/21/2018 9:15:04 PM by SYSTEM
Analysis Method : E:\DATA\XSM\In33 181121 03-151 4-Me-aH 4p 2c div 2018-11-21 21-15-03\In33
                  AD-98-60min-238 4Me-aH 4p 2c div.M (Sequence Method)
Last changed    : 1/2/2019 3:50:26 PM by SYSTEM
                  (modified after loading)
Additional Info : Peak(s) manually integrated
```

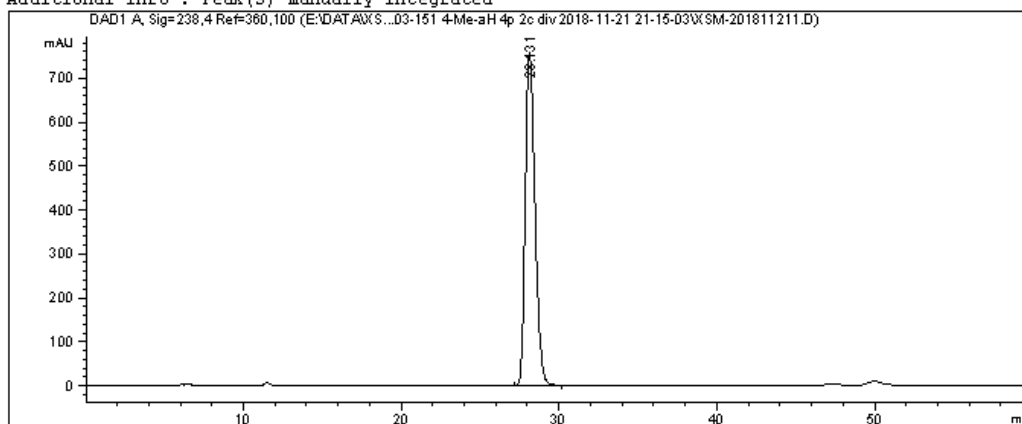

#### Area Percent Report

```
Sorted By      : Signal
Multiplier     : 1.0000
Dilution       : 1.0000
Do not use Multiplier & Dilution Factor with ISTDs
```

Signal 1: DAD1 A, Sig=238,4 Ref=360,100

| Peak # | RetTime [min] | Type | Width [min] | Area [mAU*s] | Height [mAU] | Area %   |
|--------|---------------|------|-------------|--------------|--------------|----------|
| 1      | 28.131        | BB   | 0.6401      | 3.20875e4    | 757.69623    | 100.0000 |

Totals : 3.20875e4 757.69623

\*\*\* End of Report \*\*\*

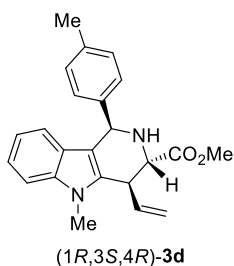

Data File E:\DATA\XSM\In33 181227 03-151 4-Me-aH 2c div 2018-12-27 22-40-15\XSM 20181227.D  
Sample Name: In33 03-151 4-Me-aH R+L-1

```
=====
Acq. Operator   : SYSTEM                      Seq. Line :    1
Acq. Instrument : 1260                      Location  :   68
Injection Date  : 12/27/2018 10:41:52 PM      Inj       :    1
                                           Inj Volume: 20.000 µl
Acq. Method     : E:\DATA\XSM\In33 181227 03-151 4-Me-aH 2c div 2018-12-27 22-40-15\In33 AD-
                                           98-60min-238 4Me-aH 4p 2c div.M
Last changed    : 12/27/2018 10:40:16 PM by SYSTEM
Analysis Method : E:\DATA\XSM\In33 181227 03-151 4-Me-aH 2c div 2018-12-27 22-40-15\In33 AD-
                                           98-60min-238 4Me-aH 4p 2c div.M (Sequence Method)
Last changed    : 1/2/2019 3:55:22 PM by SYSTEM
                                           (modified after loading)
Additional Info : Peak(s) manually integrated
```

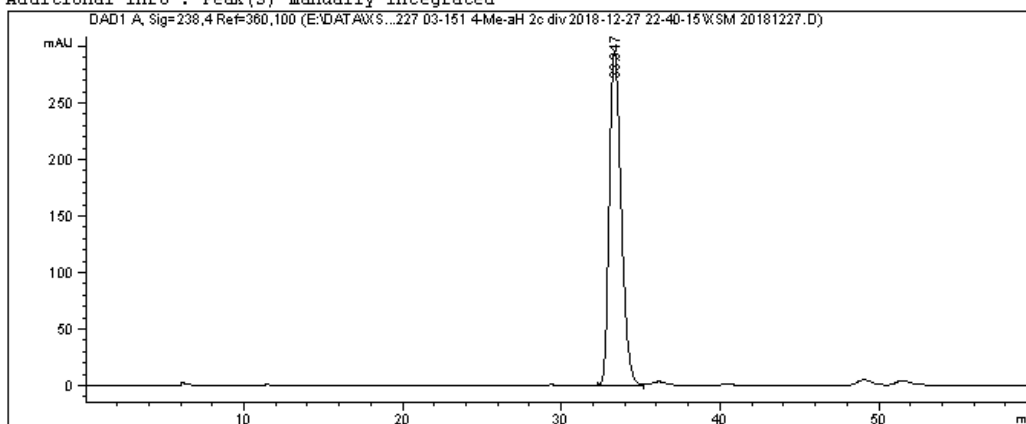

#### Area Percent Report

```
Sorted By      : Signal
Multiplier     : 1.0000
Dilution       : 1.0000
Do not use Multiplier & Dilution Factor with ISTDs
```

Signal 1: DAD1 A, Sig=238,4 Ref=360,100

| Peak # | RetTime [min] | Type | Width [min] | Area [mAU*s] | Height [mAU] | Area %   |
|--------|---------------|------|-------------|--------------|--------------|----------|
| 1      | 33.347        | BB   | 0.7472      | 1.53247e4    | 294.44476    | 100.0000 |

Totals : 1.53247e4 294.44476

\*\*\* End of Report \*\*\*

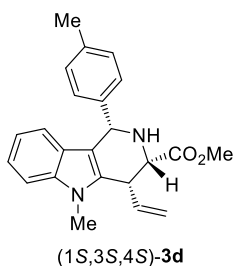

Data File E:\DATA\XS...181121 03-151 4-Me-aH 4p 2c div 2018-11-21 21-15-03\XSM-201811213.D  
Sample Name: In33 03-151 4-Me-aH S+L opt

```

=====
Acq. Operator   : SYSTEM                      Seq. Line :    4
Acq. Instrument : 1260                      Location  :   58
Injection Date  : 11/22/2018 12:21:37 AM      Inj       :    1
                                           Inj Volume: 20.000 µl
Acq. Method     : E:\DATA\XSM\In33 181121 03-151 4-Me-aH 4p 2c div 2018-11-21 21-15-03\In33
                  AD-98-60min-238 4Me-aH 4p 2c div.M
Last changed    : 11/21/2018 9:15:04 PM by SYSTEM
Analysis Method : E:\DATA\XSM\In33 181121 03-151 4-Me-aH 4p 2c div 2018-11-21 21-15-03\In33
                  AD-98-60min-238 4Me-aH 4p 2c div.M (Sequence Method)
Last changed    : 1/2/2019 3:50:26 PM by SYSTEM
                  (modified after loading)
Additional Info : Peak(s) manually integrated
  
```

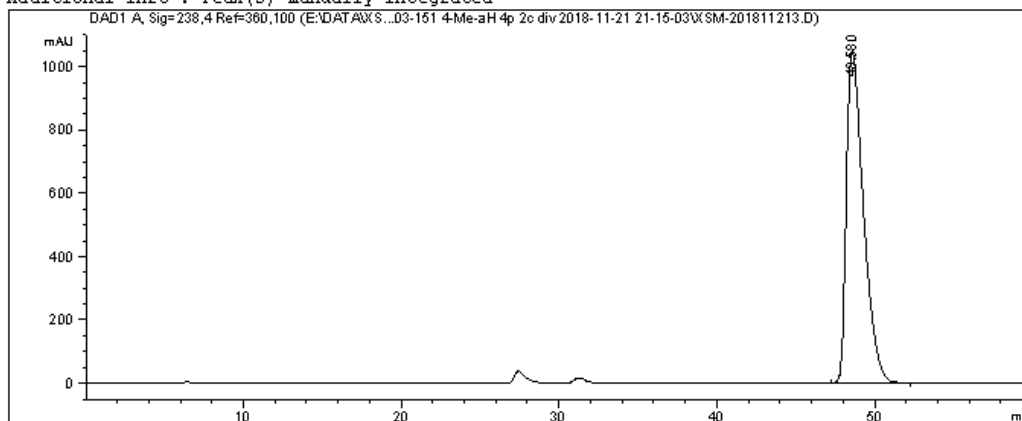

=====  
Area Percent Report  
=====

```

Sorted By      :      Signal
Multiplier     :      1.0000
Dilution       :      1.0000
Do not use Multiplier & Dilution Factor with ISTDs
  
```

Signal 1: DAD1 A, Sig=238,4 Ref=360,100

| Peak # | RetTime [min] | Type | Width [min] | Area [mAU*s] | Height [mAU] | Area %   |
|--------|---------------|------|-------------|--------------|--------------|----------|
| 1      | 48.580        | BB   | 1.0054      | 7.90543e4    | 1048.80359   | 100.0000 |

Totals :                      7.90543e4 1048.80359

=====  
\*\*\* End of Report \*\*\*

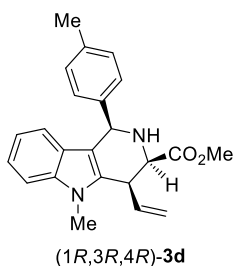

Data File E:\DATA\XSM\In33 181228 03-151 4-Me-aH opt 2018-12-28 17-43-05\XSM 20181228.D  
 Sample Name: In33 03-151 4-Me-aH R+D opt

```
=====
Acq. Operator   : SYSTEM                      Seq. Line :    1
Acq. Instrument : 1260                      Location  :    70
Injection Date  : 12/28/2018 5:44:38 PM      Inj       :    1
                                           Inj Volume: 20.000 µl

Acq. Method     : E:\DATA\XSM\In33 181228 03-151 4-Me-aH opt 2018-12-28 17-43-05\In33 AD-98-
                  60min-238 4Me-aH 4p 2c div.M
Last changed    : 12/28/2018 5:43:06 PM by SYSTEM
Analysis Method : E:\DATA\XSM\In33 181228 03-151 4-Me-aH opt 2018-12-28 17-43-05\In33 AD-98-
                  60min-238 4Me-aH 4p 2c div.M (Sequence Method)
Last changed    : 1/2/2019 2:46:23 PM by SYSTEM
                  (modified after loading)
Additional Info : Peak(s) manually integrated
```

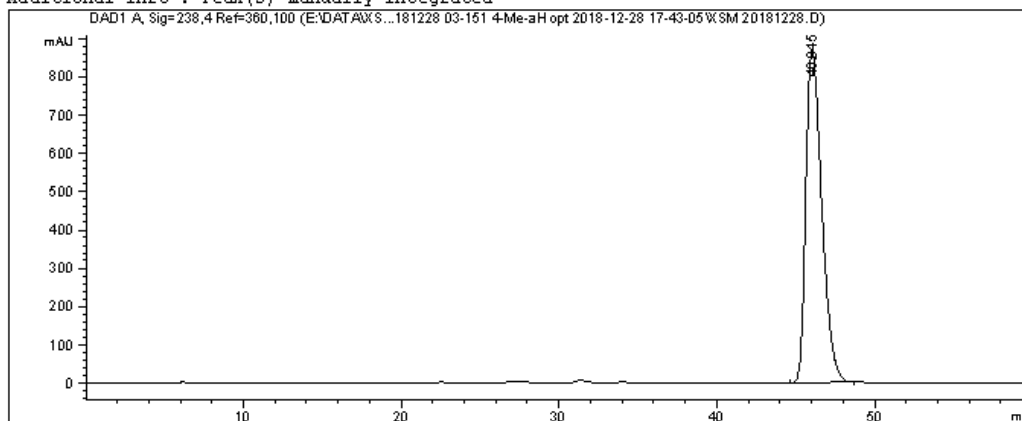

# Area Percent Report

```
Sorted By      : Signal
Multiplier     : 1.0000
Dilution       : 1.0000
Do not use Multiplier & Dilution Factor with ISTDs
```

Signal 1: DAD1 A, Sig=238,4 Ref=360,100

| Peak # | RetTime [min] | Type | Width [min] | Area [mAU*s] | Height [mAU] | Area %   |
|--------|---------------|------|-------------|--------------|--------------|----------|
| 1      | 46.045        | BB   | 0.8462      | 6.10427e4    | 866.19482    | 100.0000 |

Totals : 6.10427e4 866.19482

\*\*\* End of Report \*\*\*

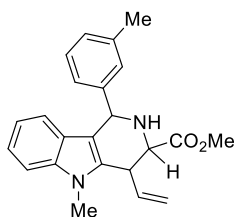

(1R\*,3S\*,4R\*)-3e

Data File E:\DATA\XSM\In33 190112 04-12 23Me-aH 2col 2019-01-12 11-06-02\XSM 201901125.D  
Sample Name: In33 04-12 3-Me-aH rac

```
=====
Acq. Operator   : SYSTEM                      Seq. Line :    6
Acq. Instrument : 1260                      Location  :   80
Injection Date  : 1/12/2019 1:54:02 PM        Inj       :    1
                                           Inj Volume: 5.000 µl

Acq. Method     : E:\DATA\XSM\In33 190112 04-12 23Me-aH 2col 2019-01-12 11-06-02\In33 AD-98-
                  234nm-40min 23Me-aH 2col.M
Last changed    : 1/12/2019 2:56:50 PM by SYSTEM
                  (modified after loading)
Analysis Method : E:\DATA\XSM\In33 190112 04-12 23Me-aH 2col 2019-01-12 11-06-02\In33 AD-98-
                  234nm-40min 23Me-aH 2col.M (Sequence Method)
Last changed    : 1/12/2019 5:19:13 PM by SYSTEM
                  (modified after loading)
Additional Info  : Peak(s) manually integrated
```

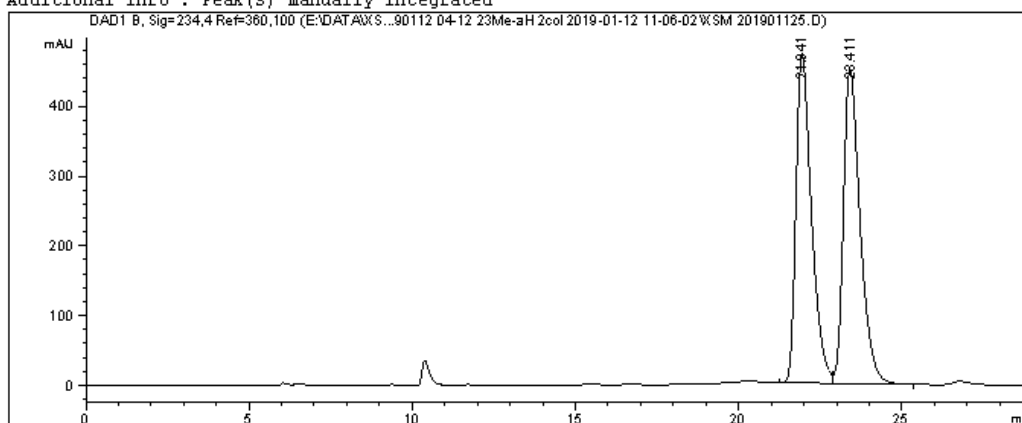

#### Area Percent Report

```
Sorted By      : Signal
Multiplier     : 1.0000
Dilution       : 1.0000
Do not use Multiplier & Dilution Factor with ISTDs
```

Signal 1: DAD1 B, Sig=234,4 Ref=360,100

| Peak # | RetTime [min] | Type | Width [min] | Area [mAU*s] | Height [mAU] | Area %  |
|--------|---------------|------|-------------|--------------|--------------|---------|
| 1      | 21.941        | BV   | 0.4924      | 1.55540e4    | 472.09314    | 49.3371 |
| 2      | 23.411        | VB   | 0.5293      | 1.59720e4    | 450.89838    | 50.6629 |

Totals : 3.15260e4 922.99152

\*\*\* End of Report \*\*\*

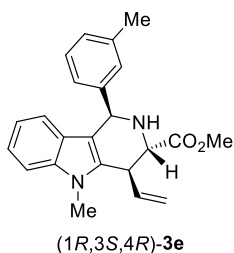

Data File E:\DATA\XSM\In33 190112 04-12 23Me-aH 2col 2019-01-12 11-06-02\XSM 201901124.D  
Sample Name: In33 04-12 3-Me-aH R+L opt

```
=====
Acq. Operator   : SYSTEM                      Seq. Line :    5
Acq. Instrument : 1260                      Location  :   79
Injection Date  : 1/12/2019 1:13:05 PM       Inj       :    1
                                           Inj Volume: 5.000 µl

Acq. Method     : E:\DATA\XSM\In33 190112 04-12 23Me-aH 2col 2019-01-12 11-06-02\In33 AD-98-
                  234nm-40min 23Me-aH 2col.M
Last changed    : 1/12/2019 11:06:03 AM by SYSTEM
Analysis Method : E:\DATA\XSM\In33 190112 04-12 23Me-aH 2col 2019-01-12 11-06-02\In33 AD-98-
                  234nm-40min 23Me-aH 2col.M (Sequence Method)
Last changed    : 1/12/2019 5:16:07 PM by SYSTEM
                  (modified after loading)
Additional Info : Peak(s) manually integrated
```

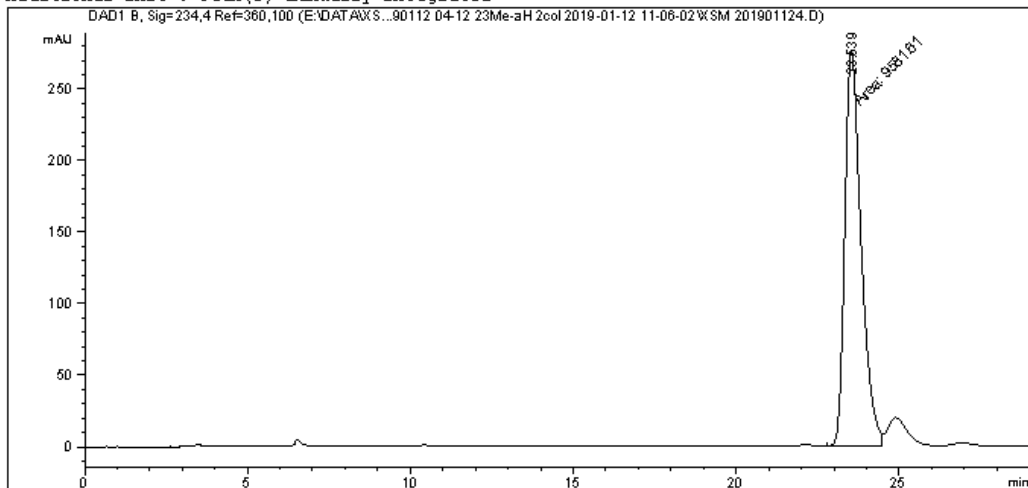

#### Area Percent Report

```
Sorted By      : Signal
Multiplier     : 1.0000
Dilution       : 1.0000
Do not use Multiplier & Dilution Factor with ISTDs
```

Signal 1: DAD1 B, Sig=234,4 Ref=360,100

| Peak # | RetTime [min] | Type | Width [min] | Area [mAU*s] | Height [mAU] | Area %   |
|--------|---------------|------|-------------|--------------|--------------|----------|
| 1      | 23.539        | MF   | 0.5797      | 9581.61426   | 275.49536    | 100.0000 |

Totals : 9581.61426 275.49536

\*\*\* End of Report \*\*\*

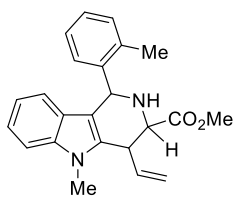

(1R\*,3S\*,4R\*)-3f

Data File E:\DATA\XSM\In33 190112 04-12 23Me-aH 2col 2019-01-12 11-06-02\XSM 201901121.D  
Sample Name: In33 04-12 2-Me-aH rac

```
=====
Acq. Operator   : SYSTEM                      Seq. Line :    2
Acq. Instrument : 1260                      Location  :   78
Injection Date  : 1/12/2019 11:48:00 AM      Inj       :    1
                                           Inj Volume: 5.000 µl
Acq. Method     : E:\DATA\XSM\In33 190112 04-12 23Me-aH 2col 2019-01-12 11-06-02\In33 AD-98-
                  234nm-40min 23Me-aH 2col.M
Last changed    : 1/12/2019 11:06:03 AM by SYSTEM
Analysis Method : E:\DATA\XSM\In33 190112 04-12 23Me-aH 2col 2019-01-12 11-06-02\In33 AD-98-
                  234nm-40min 23Me-aH 2col.M (Sequence Method)
Last changed    : 1/12/2019 5:16:07 PM by SYSTEM
                  (modified after loading)
Additional Info : Peak(s) manually integrated
```

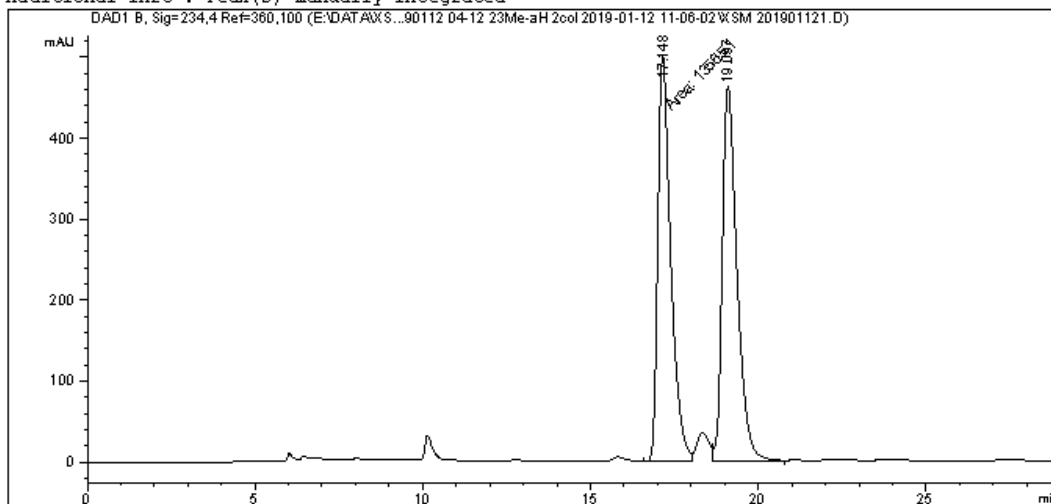

#### Area Percent Report

```
Sorted By      : Signal
Multiplier     : 1.0000
Dilution       : 1.0000
Do not use Multiplier & Dilution Factor with ISTDs
```

Signal 1: DAD1 B, Sig=234,4 Ref=360,100

| Peak # | RetTime [min] | Type | Width [min] | Area [mAU*s] | Height [mAU] | Area %  |
|--------|---------------|------|-------------|--------------|--------------|---------|
| 1      | 17.148        | MF   | 0.4503      | 1.35651e4    | 502.08762    | 49.3089 |
| 2      | 19.097        | VB   | 0.4477      | 1.39453e4    | 462.64755    | 50.6911 |

Totals : 2.75104e4 964.73517

\*\*\* End of Report \*\*\*

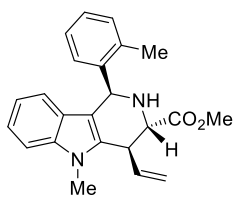

(1R,3S,4R)-3f

Data File E:\DATA\XSM\In33 190112 04-12 23Me-aH 2col 2019-01-12 11-06-02\XSM 201901122.D  
Sample Name: In33 04-12 2-Me-aH R+L opt

```
=====
Acq. Operator   : SYSTEM                      Seq. Line :    3
Acq. Instrument : 1260                      Location  :   77
Injection Date  : 1/12/2019 12:28:59 PM      Inj       :    1
                                           Inj Volume: 5.000 µl
Acq. Method     : E:\DATA\XSM\In33 190112 04-12 23Me-aH 2col 2019-01-12 11-06-02\In33 AD-98-
                  234nm-40min 23Me-aH 2col.M
Last changed    : 1/12/2019 11:06:03 AM by SYSTEM
Analysis Method : E:\DATA\XSM\In33 190112 04-12 23Me-aH 2col 2019-01-12 11-06-02\In33 AD-98-
                  234nm-40min 23Me-aH 2col.M (Sequence Method)
Last changed    : 1/12/2019 5:16:07 PM by SYSTEM
                  (modified after loading)
Additional Info : Peak(s) manually integrated
```

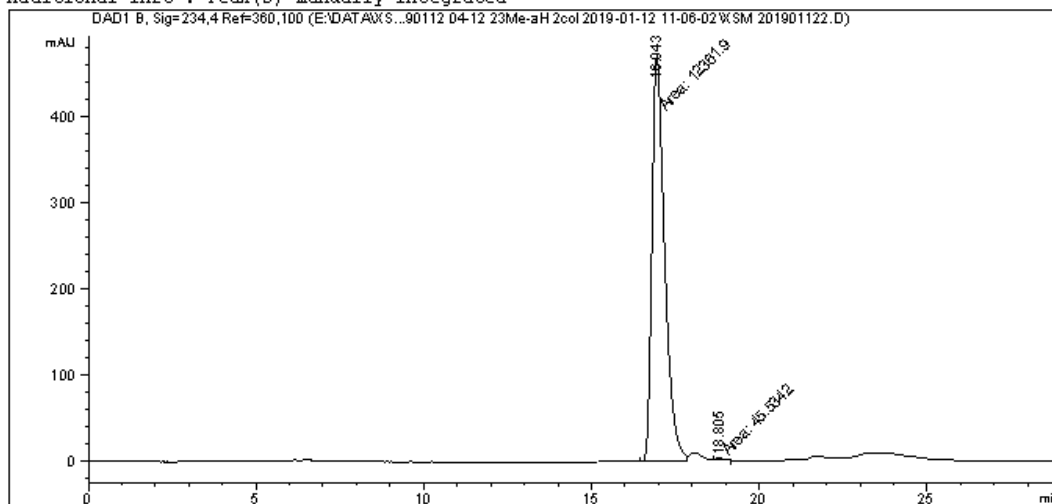

```
=====
                        Area Percent Report
=====
```

```
Sorted By      : Signal
Multiplier     : 1.0000
Dilution       : 1.0000
Do not use Multiplier & Dilution Factor with ISTDs
```

Signal 1: DAD1 B, Sig=234,4 Ref=360,100

| Peak # | RetTime [min] | Type | Width [min] | Area [mAU*s] | Height [mAU] | Area %  |
|--------|---------------|------|-------------|--------------|--------------|---------|
| 1      | 16.943        | MF   | 0.4377      | 1.23619e4    | 470.70593    | 99.6330 |
| 2      | 18.805        | MM   | 0.3073      | 45.53419     | 2.46981      | 0.3670  |

Totals : 1.24075e4 473.17574

```
=====
*** End of Report ***
```

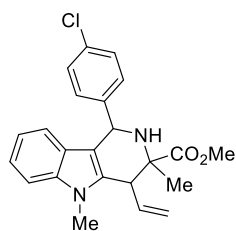

(1R\*,3S\*,4R\*)-3g

Data File E:\DATA\XS...\XSM 20180225 03-39 4-Cl 1st div 2018-12-25 19-09-33\XSM 20181225.D  
 Sample Name: In33 03-39 4-Cl 1st -rac

```
=====
Acq. Operator   : SYSTEM                      Seq. Line :    1
Acq. Instrument : 1260                      Location  :   68
Injection Date  : 12/25/2018 7:10:29 PM      Inj       :    1
                                           Inj Volume: 10.000 µl
Acq. Method     : E:\DATA\XSM-In33\XSM 20180225 03-39 4-Cl 1st div 2018-12-25 19-09-33\In33
                  AS-98-0.5mL-234-82nm-10uL 4-Cl 1st.M
Last changed    : 12/25/2018 7:09:33 PM by SYSTEM
Analysis Method : E:\DATA\XSM-In33\XSM 20180225 03-39 4-Cl 1st div 2018-12-25 19-09-33\In33
                  AS-98-0.5mL-234-82nm-10uL 4-Cl 1st.M (Sequence Method)
Last changed    : 1/2/2019 3:32:35 PM by SYSTEM
                  (modified after loading)
Additional Info  : Peak(s) manually integrated
```

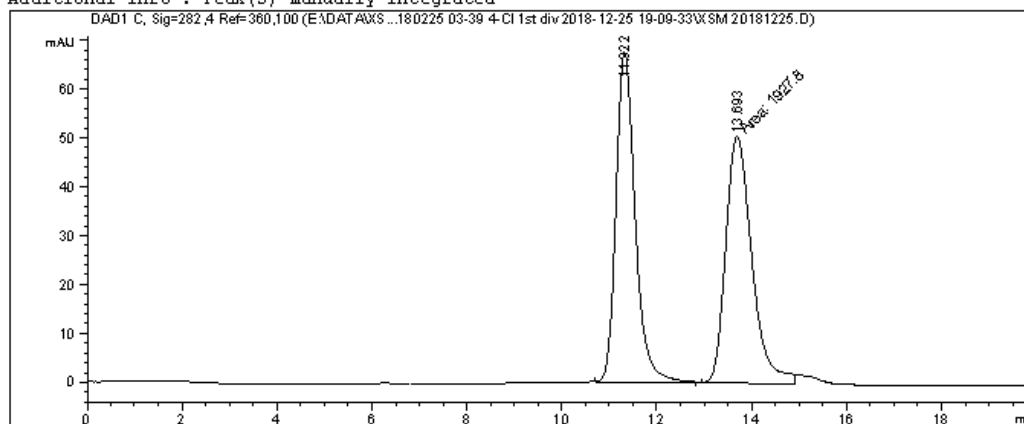

# Area Percent Report

```
Sorted By      : Signal
Multiplier     : 1.0000
Dilution       : 1.0000
Do not use Multiplier & Dilution Factor with ISTDs
```

Signal 1: DAD1 C, Sig=282,4 Ref=360,100

| Peak # | RetTime [min] | Type | Width [min] | Area [mAU*s] | Height [mAU] | Area %  |
|--------|---------------|------|-------------|--------------|--------------|---------|
| 1      | 11.322        | BB   | 0.4265      | 1888.88147   | 67.50159     | 49.4902 |
| 2      | 13.693        | MF   | 0.6373      | 1927.79944   | 50.41568     | 50.5098 |

Totals : 3816.68091 117.91727

\*\*\* End of Report \*\*\*

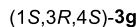

Sample Name: In33 03-39 4-C1 S+D opt

```
=====
Acq. Operator   : SYSTEM                      Seq. Line :    1
Acq. Instrument : 1260                      Location  :   68
Injection Date  : 1/11/2019 12:05:06 PM      Inj       :    1
                                           Inj Volume: 5.000 µl
Acq. Method     : E:\DATA\XSM\In33 190111 03-39 4-C1 1st 2019-01-11 12-04-05\In33 AS-98-0.5mL
                  -282nm-25min 4-C1 1st.M
Last changed    : 1/11/2019 12:04:06 PM by SYSTEM
Analysis Method : E:\DATA\XSM\In33 190111 03-39 4-C1 1st 2019-01-11 12-04-05\In33 AS-98-0.5mL
                  -282nm-25min 4-C1 1st.M (Sequence Method)
Last changed    : 1/11/2019 2:59:44 PM by SYSTEM
                  (modified after loading)
Additional Info : Peak(s) manually integrated
=====
```

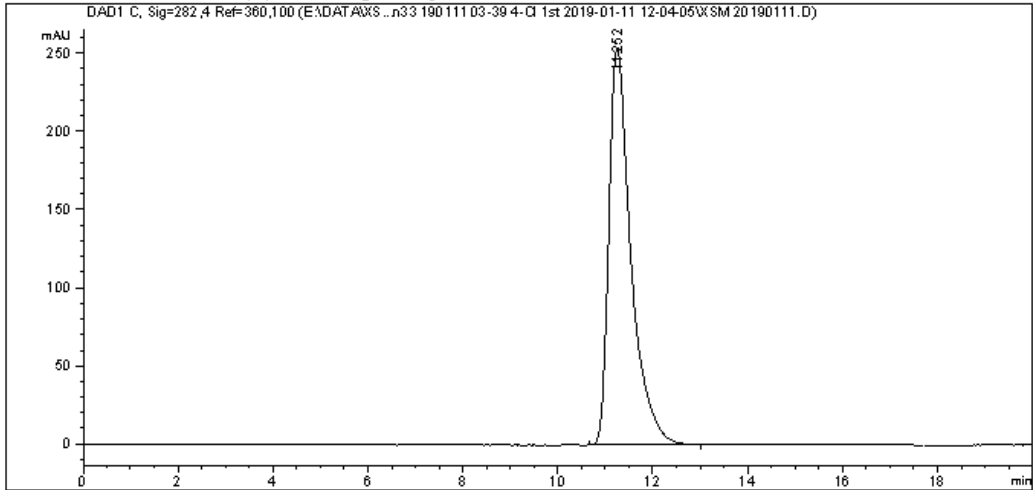

## Area Percent Report

Sorted By : Signal  
Multiplier : 1.0000  
Dilution : 1.0000  
Do not use Multiplier & Dilution Factor with ISTDs

Signal 1: DAD1 C, Sig=282,4 Ref=360,100

| Peak # | RetTime [min] | Type | Width [min] | Area [mAU*s] | Height [mAU] | Area %   |
|--------|---------------|------|-------------|--------------|--------------|----------|
| 1      | 11.252        | BB   | 0.4821      | 8172.99854   | 253.55905    | 100.0000 |

|          |            |           |
|----------|------------|-----------|
| Totals : | 8172.99854 | 253.55905 |
|----------|------------|-----------|

\*\*\* End of Report \*\*\*

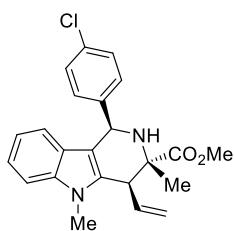

(1R,3S,4R)-3g

Data File E:\DATA\XSM\In33 190111 03-39 4-Cl 1st 2019-01-11 12-04-05\XSM 20190111.D  
Sample Name: In33 03-39 4-Cl R+L opt

```
=====
Acq. Operator   : SYSTEM                      Seq. Line :    2
Acq. Instrument : 1260                      Location  :   69
Injection Date  : 1/11/2019 12:31:05 PM      Inj       :    1
                                           Inj Volume: 5.000 µl
Acq. Method     : E:\DATA\XSM\In33 190111 03-39 4-Cl 1st 2019-01-11 12-04-05\In33 AS-98-0.5mL
                  -282nm-25min 4-Cl 1st.M
Last changed    : 1/11/2019 12:04:06 PM by SYSTEM
Analysis Method : E:\DATA\XSM\In33 190111 03-39 4-Cl 1st 2019-01-11 12-04-05\In33 AS-98-0.5mL
                  -282nm-25min 4-Cl 1st.M (Sequence Method)
Last changed    : 1/11/2019 2:59:44 PM by SYSTEM
                  (modified after loading)
Additional Info : Peak(s) manually integrated
```

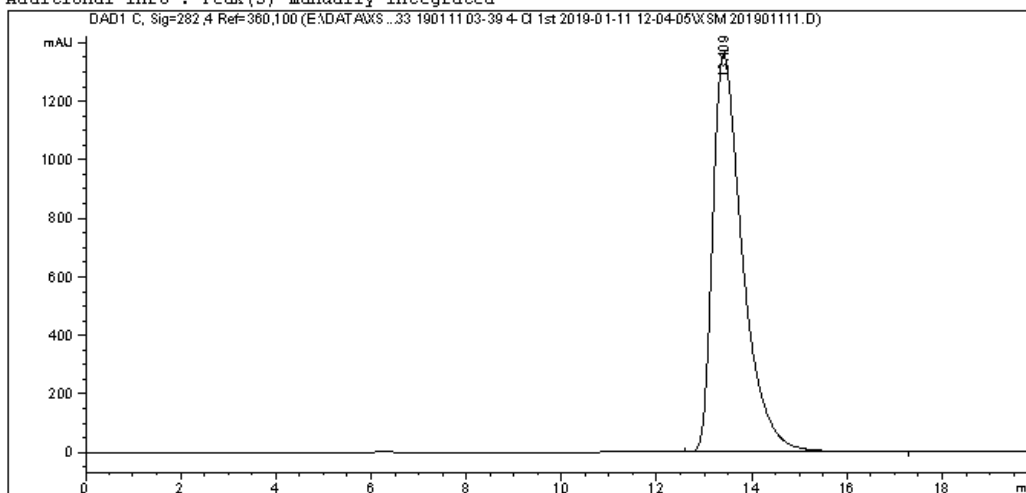

# Area Percent Report

```
Sorted By      : Signal
Multiplier     : 1.0000
Dilution      : 1.0000
Do not use Multiplier & Dilution Factor with ISTDs
```

Signal 1: DAD1 C, Sig=282,4 Ref=360,100

| Peak # | RetTime [min] | Type | Width [min] | Area [mAU*s] | Height [mAU] | Area %   |
|--------|---------------|------|-------------|--------------|--------------|----------|
| 1      | 13.409        | BB   | 0.6533      | 5.92288e4    | 1356.78369   | 100.0000 |

Totals : 5.92288e4 1356.78369

\*\*\* End of Report \*\*\*

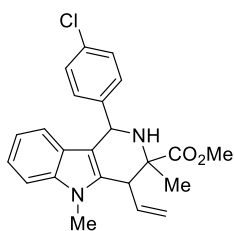

(1*R*\*,3*R*\*,4*R*\*)-3g

Data File E:\DATA\XSM\In33 181217 03-39 4-Cl 2nd 2018-12-17 13-36-21\XSM 201812172.D  
 Sample Name: In33 03-39 4-Cl 2nd rac

```
=====
Acq. Operator   : SYSTEM                      Seq. Line :    3
Acq. Instrument : 1260                      Location  :    70
Injection Date  : 12/17/2018 2:19:19 PM      Inj       :    1
                                           Inj Volume: 5.000 µl
Acq. Method     : E:\DATA\XSM\In33 181217 03-39 4-Cl 2nd 2018-12-17 13-36-21\In33 AS-98-1ml-
                  20min-260-82nm 4-Cl 2nd.M
Last changed    : 12/17/2018 1:36:22 PM by SYSTEM
Analysis Method : E:\DATA\XSM\In33 181217 03-39 4-Cl 2nd 2018-12-17 13-36-21\In33 AS-98-1ml-
                  20min-260-82nm 4-Cl 2nd.M (Sequence Method)
Last changed    : 1/2/2019 3:23:48 PM by SYSTEM
                  (modified after loading)
```

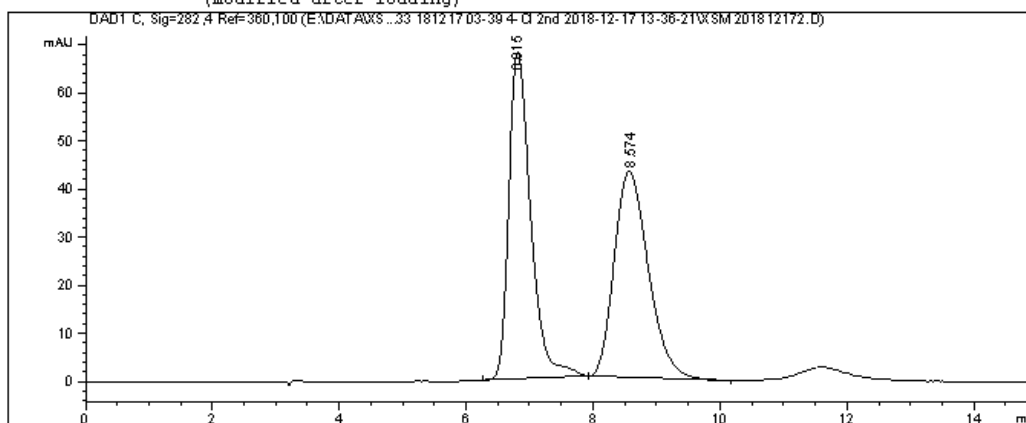

# Area Percent Report

```
Sorted By      :      Signal
Multiplier     :      1.0000
Dilution       :      1.0000
Do not use Multiplier & Dilution Factor with ISTDs
```

Signal 1: DAD1 C, Sig=282,4 Ref=360,100

| Peak # | RetTime [min] | Type | Width [min] | Area [mAU*s] | Height [mAU] | Area %  |
|--------|---------------|------|-------------|--------------|--------------|---------|
| 1      | 6.815         | BB   | 0.3631      | 1625.36267   | 67.92990     | 50.3685 |
| 2      | 8.574         | BB   | 0.5701      | 1601.57800   | 42.84415     | 49.6315 |

Totals : 3226.94067 110.77405

\*\*\* End of Report \*\*\*

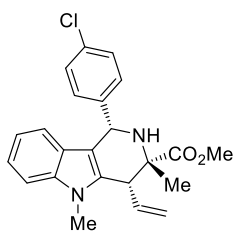

(1S,3S,4S)-3g

Data File E:\DATA\XSM\In33 181217 03-39 4-Cl 2nd 2018-12-17 13-36-21\XSM 20181217.D  
Sample Name: In33 03-39 4-Cl S+L opt

```
=====
Acq. Operator   : SYSTEM                      Seq. Line :    1
Acq. Instrument : 1260                      Location  :   68
Injection Date  : 12/17/2018 1:37:25 PM      Inj       :    1
                                           Inj Volume: 5.000 µl
Acq. Method     : E:\DATA\XSM\In33 181217 03-39 4-Cl 2nd 2018-12-17 13-36-21\In33 AS-98-1ml-
                  20min-260-82nm 4-Cl 2nd.M
Last changed    : 12/17/2018 1:36:22 PM by SYSTEM
Analysis Method : E:\DATA\XSM\In33 181217 03-39 4-Cl 2nd 2018-12-17 13-36-21\In33 AS-98-1ml-
                  20min-260-82nm 4-Cl 2nd.M (Sequence Method)
Last changed    : 1/2/2019 3:23:48 PM by SYSTEM
                  (modified after loading)
=====
```

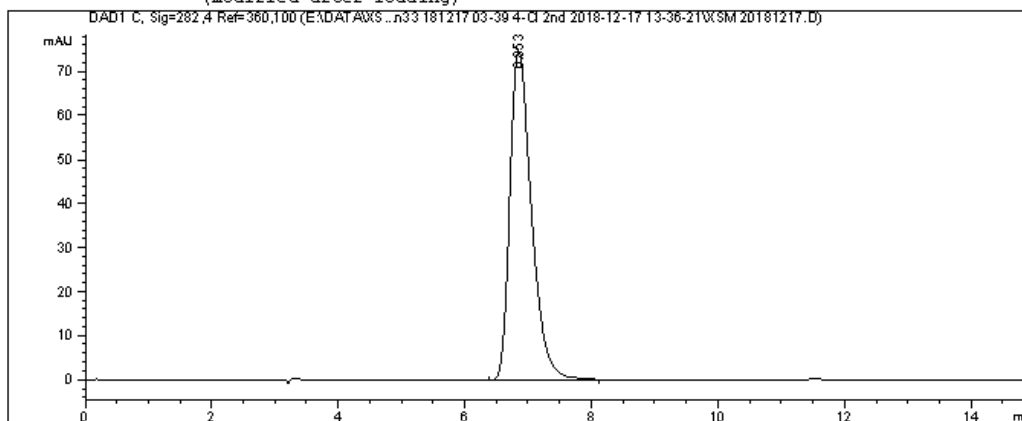

```
=====
Area Percent Report
=====
```

```
Sorted By      :      Signal
Multiplier     :      1.0000
Dilution       :      1.0000
Do not use Multiplier & Dilution Factor with ISTDs
```

Signal 1: DAD1 C, Sig=282,4 Ref=360,100

| Peak # | RetTime [min] | Type | Width [min] | Area [mAU*s] | Height [mAU] | Area %   |
|--------|---------------|------|-------------|--------------|--------------|----------|
| 1      | 6.853         | BB   | 0.3644      | 1772.95496   | 74.83467     | 100.0000 |

Totals : 1772.95496 74.83467

```
=====
*** End of Report ***
=====
```

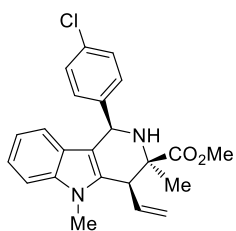

(1R,3R,4R)-3g

Data File E:\DATA\XSM\In33 181217 03-39 4-Cl 2nd 2018-12-17 13-36-21\XSM 201812171.D  
Sample Name: In33 03-39 4-Cl R+D opt

```
=====
Acq. Operator   : SYSTEM                      Seq. Line :    2
Acq. Instrument : 1260                      Location  :   69
Injection Date  : 12/17/2018 1:58:21 PM      Inj       :    1
                                           Inj Volume: 5.000 µl

Acq. Method     : E:\DATA\XSM\In33 181217 03-39 4-Cl 2nd 2018-12-17 13-36-21\In33 AS-98-1ml-
                  20min-260-82nm 4-Cl 2nd.M
Last changed    : 12/17/2018 1:36:22 PM by SYSTEM
Analysis Method : E:\DATA\XSM\In33 181217 03-39 4-Cl 2nd 2018-12-17 13-36-21\In33 AS-98-1ml-
                  20min-260-82nm 4-Cl 2nd.M (Sequence Method)
Last changed    : 1/2/2019 3:23:48 PM by SYSTEM
                  (modified after loading)
```

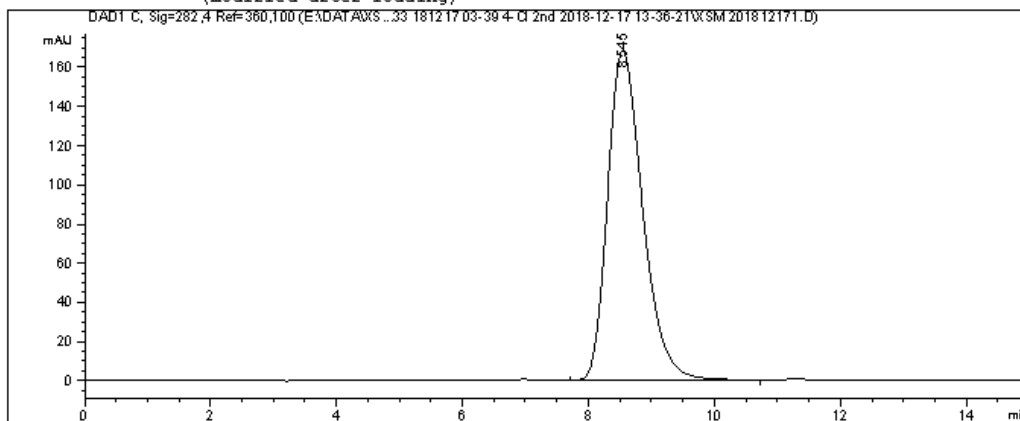

# Area Percent Report

```
Sorted By      :      Signal
Multiplier     :      1.0000
Dilution       :      1.0000
Do not use Multiplier & Dilution Factor with ISTDs
```

Signal 1: DAD1 C, Sig=282,4 Ref=360,100

| Peak # | RetTime [min] | Type | Width [min] | Area [mAU*s] | Height [mAU] | Area %   |
|--------|---------------|------|-------------|--------------|--------------|----------|
| 1      | 8.545         | BB   | 0.5928      | 6517.98730   | 168.69238    | 100.0000 |

Totals : 6517.98730 168.69238

\*\*\* End of Report \*\*\*

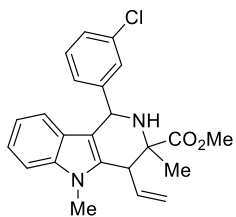

Data File E:\DATA\XSM-In33\In33 181205 04-1 234-Cl 2018-12-05 16-44-00\XSM 201812054.D  
Sample Name: In33 04-1 3-Cl 1st rac

```

=====
Acq. Operator   : SYSTEM                      Seq. Line :    5
Acq. Instrument : 1260                      Location  :   67
Injection Date  : 12/5/2018 6:24:01 PM        Inj       :    1
                                           Inj Volume: 5.000 µl
Acq. Method     : E:\DATA\XSM-In33\In33 181205 04-1 234-Cl 2018-12-05 16-44-00\In33 AS-98-0.
                                           5mL-234nm-25min 234-Cl.M
Last changed    : 12/5/2018 4:44:00 PM by SYSTEM
Analysis Method : E:\DATA\XSM-In33\In33 181205 04-1 234-Cl 2018-12-05 16-44-00\In33 AS-98-0.
                                           5mL-234nm-25min 234-Cl.M (Sequence Method)
Last changed    : 12/18/2018 7:15:06 PM by SYSTEM
                                           (modified after loading)
Additional Info : Peak(s) manually integrated

```

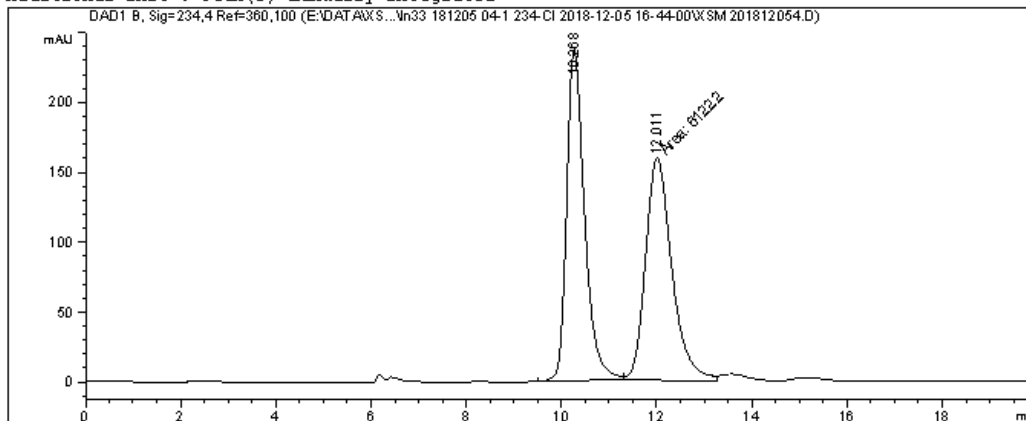

#### Area Percent Report

```

Sorted By      : Signal
Multiplier     : 1.0000
Dilution       : 1.0000
Do not use Multiplier & Dilution Factor with ISTDs

```

Signal 1: DAD1 B, Sig=234,4 Ref=360,100

| Peak # | RetTime [min] | Type | Width [min] | Area [mAU*s] | Height [mAU] | Area %  |
|--------|---------------|------|-------------|--------------|--------------|---------|
| 1      | 10.268        | BV   | 0.3966      | 6192.99609   | 237.19498    | 50.2874 |
| 2      | 12.011        | MM   | 0.6420      | 6122.20313   | 158.93069    | 49.7126 |

Totals : 1.23152e4 396.12567

\*\*\* End of Report \*\*\*

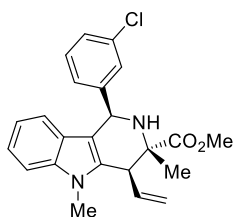

(1R,3S,4R)-3h

Data File E:\DATA\XSM-In33\In33 181205 04-1 234-Cl 2018-12-05 16-44-00\XSM 201812052.D  
Sample Name: In33 04-1 3-Cl R+L opt

```
=====
Acq. Operator   : SYSTEM                      Seq. Line :    3
Acq. Instrument : 1260                      Location  :   68
Injection Date  : 12/5/2018 5:36:54 PM        Inj       :    1
                                           Inj Volume: 5.000 µl

Acq. Method     : E:\DATA\XSM-In33\In33 181205 04-1 234-Cl 2018-12-05 16-44-00\In33 AS-98-0.
                  5mL-234nm-25min 234-Cl.M
Last changed    : 12/5/2018 4:44:00 PM by SYSTEM
Analysis Method : E:\DATA\XSM-In33\In33 181205 04-1 234-Cl 2018-12-05 16-44-00\In33 AS-98-0.
                  5mL-234nm-25min 234-Cl.M (Sequence Method)
Last changed    : 12/18/2018 7:15:06 PM by SYSTEM
                  (modified after loading)
Additional Info : Peak(s) manually integrated
```

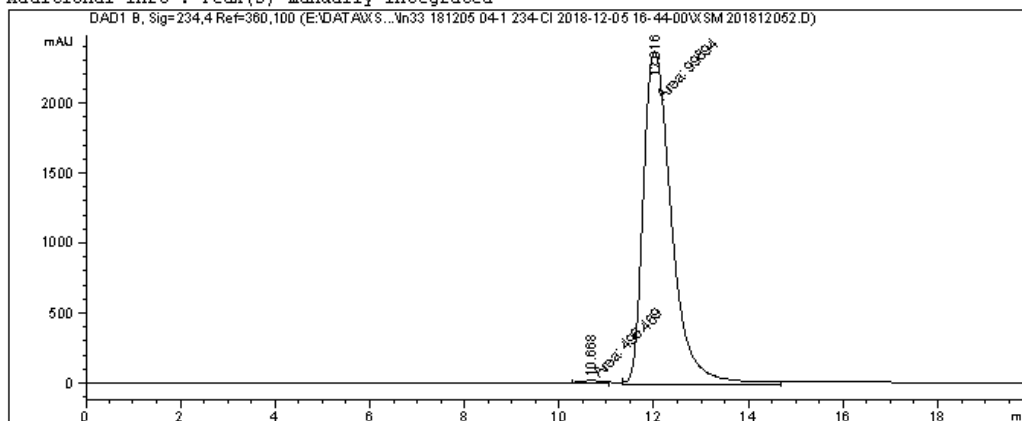

# Area Percent Report

```
Sorted By      : Signal
Multiplier     : 1.0000
Dilution       : 1.0000
Do not use Multiplier & Dilution Factor with ISTDs
```

Signal 1: DAD1 B, Sig=234,4 Ref=360,100

| Peak # | RetTime [min] | Type | Width [min] | Area [mAU*s] | Height [mAU] | Area %  |
|--------|---------------|------|-------------|--------------|--------------|---------|
| 1      | 10.668        | MM   | 0.4794      | 496.46942    | 17.26161     | 0.4945  |
| 2      | 12.016        | MM   | 0.6992      | 9989.40e4    | 2381.04370   | 99.5055 |

Totals : 1.00391e5 2398.30531

\*\*\* End of Report \*\*\*

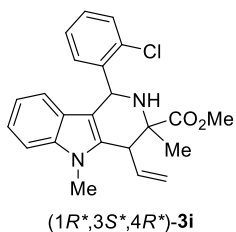

Data File E:\DATA\XSM-In33\In33 181205 04-1 234-Cl 2018-12-05 16-44-00\XSM 201812056.D  
Sample Name: In33 04-1 2-Cl 1st rac

```
=====
Acq. Operator   : SYSTEM                      Seq. Line :    7
Acq. Instrument : 1260                      Location  :   65
Injection Date  : 12/5/2018 7:15:55 PM        Inj       :    1
                                           Inj Volume: 5.000 µl
Acq. Method     : E:\DATA\XSM-In33\In33 181205 04-1 234-Cl 2018-12-05 16-44-00\In33 AS-98-0.
                                           5mL-234nm-25min 234-Cl.M
Last changed    : 12/5/2018 4:44:00 PM by SYSTEM
Analysis Method : E:\DATA\XSM-In33\In33 181205 04-1 234-Cl 2018-12-05 16-44-00\In33 AS-98-0.
                                           5mL-234nm-25min 234-Cl.M (Sequence Method)
Last changed    : 1/2/2019 5:47:12 PM by SYSTEM
                                           (modified after loading)
Additional Info : Peak(s) manually integrated
```

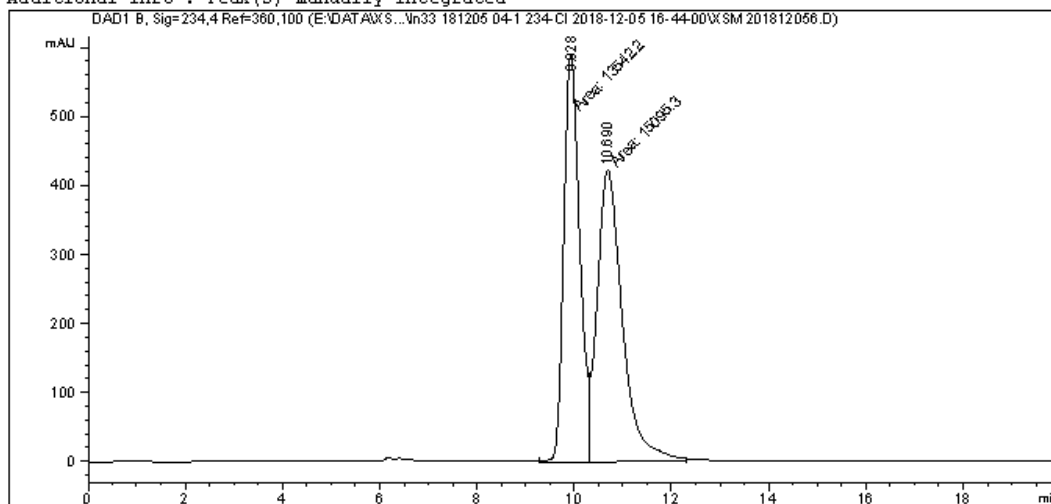

#### Area Percent Report

```
Sorted By      : Signal
Multiplier     : 1.0000
Dilution       : 1.0000
Do not use Multiplier & Dilution Factor with ISTDs
```

Signal 1: DAD1 B, Sig=234,4 Ref=360,100

| Peak # | RetTime [min] | Type | Width [min] | Area [mAU*s] | Height [mAU] | Area %  |
|--------|---------------|------|-------------|--------------|--------------|---------|
| 1      | 9.928         | MF   | 0.3827      | 1.35422e4    | 589.69885    | 47.2883 |
| 2      | 10.690        | FM   | 0.5947      | 1.50953e4    | 423.07846    | 52.7117 |

Totals : 2.86374e4 1012.77731

\*\*\* End of Report \*\*\*

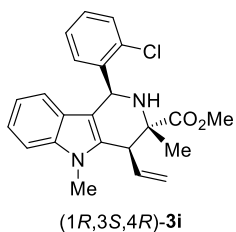

Data File E:\DATA\XSM-In33\In33 181205 04-1 234-Cl 2018-12-05 16-44-00\XSM 201812055.D  
Sample Name: In33 04-1 2-Cl R+L opt

```
=====
Acq. Operator   : SYSTEM                      Seq. Line :    6
Acq. Instrument : 1260                      Location  :   66
Injection Date  : 12/5/2018 6:50:00 PM        Inj       :    1
                                           Inj Volume: 5.000 µl

Acq. Method     : E:\DATA\XSM-In33\In33 181205 04-1 234-Cl 2018-12-05 16-44-00\In33 AS-98-0.
                  5mL-234nm-25min 234-Cl.M
Last changed    : 12/5/2018 4:44:00 PM by SYSTEM
Analysis Method : E:\DATA\XSM-In33\In33 181205 04-1 234-Cl 2018-12-05 16-44-00\In33 AS-98-0.
                  5mL-234nm-25min 234-Cl.M (Sequence Method)
Last changed    : 1/2/2019 5:47:12 PM by SYSTEM
                  (modified after loading)
Additional Info : Peak(s) manually integrated
```

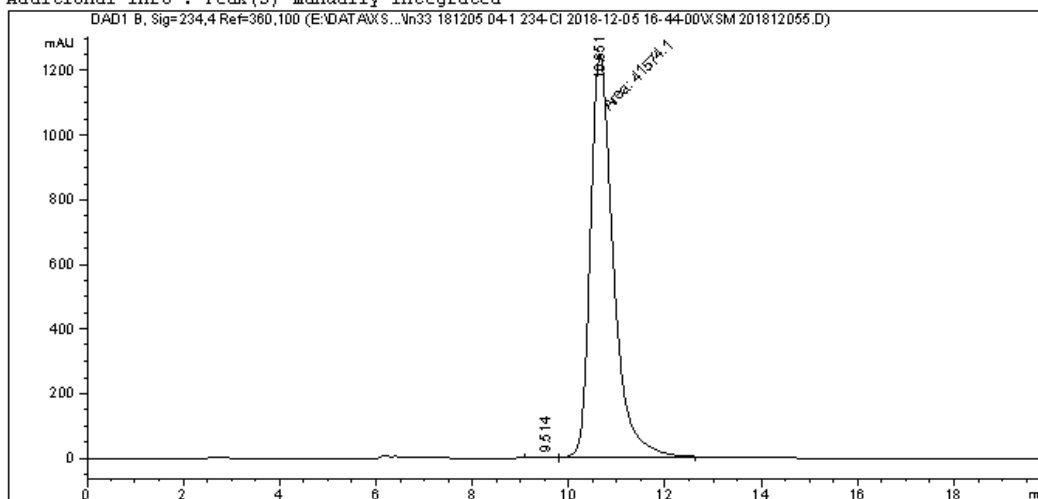

```
=====
                          Area Percent Report
=====
```

```
Sorted By      :      Signal
Multiplier     :      1.0000
Dilution       :      1.0000
Do not use Multiplier & Dilution Factor with ISTDs
```

Signal 1: DAD1 B, Sig=234,4 Ref=360,100

| Peak # | RetTime [min] | Type | Width [min] | Area [mAU*s] | Height [mAU] | Area %  |
|--------|---------------|------|-------------|--------------|--------------|---------|
| 1      | 9.514         | BB   | 0.2212      | 41.83960     | 2.35537      | 0.1005  |
| 2      | 10.651        | MF   | 0.5566      | 4.15741e4    | 1244.78259   | 99.8995 |

Totals : 4.16159e4 1247.13796

```
=====
*** End of Report ***
```

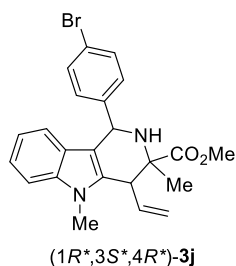

Data File E:\DATA\XSM\In33 180530 03-37 4-Br-N-F-T 2018-05-30 16-04-37\XSM 180530.D  
 Sample Name: In33 03-37 4-Br 1st rac

```

=====
Acq. Operator   : SYSTEM                      Seq. Line :    1
Acq. Instrument : 1260                      Location  :   13
Injection Date  : 5/30/2018 4:05:33 PM       Inj       :    1
                                           Inj Volume: 5.000 µl

Acq. Method     : E:\DATA\XSM\In33 180530 03-37 4-Br-N-F-T 2018-05-30 16-04-37\In33 AS-98-2-
                  234nm-20min-noD.M
Last changed    : 5/30/2018 4:04:37 PM by SYSTEM
Analysis Method : E:\DATA\XSM\In33 180530 03-37 4-Br-N-F-T 2018-05-30 16-04-37\In33 AS-98-2-
                  234nm-20min-noD.M (Sequence Method)
Last changed    : 10/8/2018 3:01:12 PM by SYSTEM
                  (modified after loading)
Additional Info : Peak(s) manually integrated
  
```

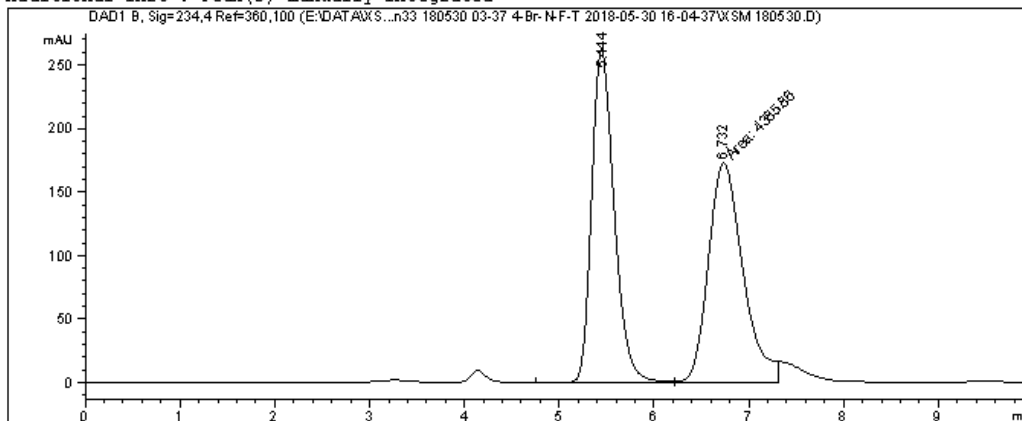

#### Area Percent Report

```

Sorted By      : Signal
Multiplier     : 1.0000
Dilution       : 1.0000
Do not use Multiplier & Dilution Factor with ISTDs
  
```

Signal 1: DAD1 B, Sig=234,4 Ref=360,100

| Peak # | RetTime [min] | Type | Width [min] | Area [mAU*s] | Height [mAU] | Area %  |
|--------|---------------|------|-------------|--------------|--------------|---------|
| 1      | 5.444         | BV   | 0.2547      | 4331.99512   | 262.23544    | 49.6910 |
| 2      | 6.732         | MF   | 0.4225      | 4385.86426   | 173.00990    | 50.3090 |

Totals : 8717.85938 435.24535

\*\*\* End of Report \*\*\*

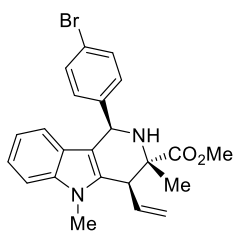

(1*R*,3*S*,4*R*)-3j

Data File E:\DATA\XSM\In33 180530 03-37 4-Br-N-F-T 2018-05-30 16-04-37\XSM 1805301.D  
Sample Name: In33 03-34 4-Br R+L opt

```
=====
Acq. Operator   : SYSTEM                      Seq. Line :    2
Acq. Instrument : 1260                      Location  :   14
Injection Date  : 5/30/2018 4:26:27 PM        Inj       :    1
                                           Inj Volume: 5.000 µl
Acq. Method     : E:\DATA\XSM\In33 180530 03-37 4-Br-N-F-T 2018-05-30 16-04-37\In33 AS-98-2-
                  234nm-20min-noD.M
Last changed    : 5/30/2018 4:04:37 PM by SYSTEM
Analysis Method : E:\DATA\XSM\In33 180530 03-37 4-Br-N-F-T 2018-05-30 16-04-37\In33 AS-98-2-
                  234nm-20min-noD.M (Sequence Method)
Last changed    : 10/8/2018 3:01:12 PM by SYSTEM
                  (modified after loading)
Additional Info  : Peak(s) manually integrated
```

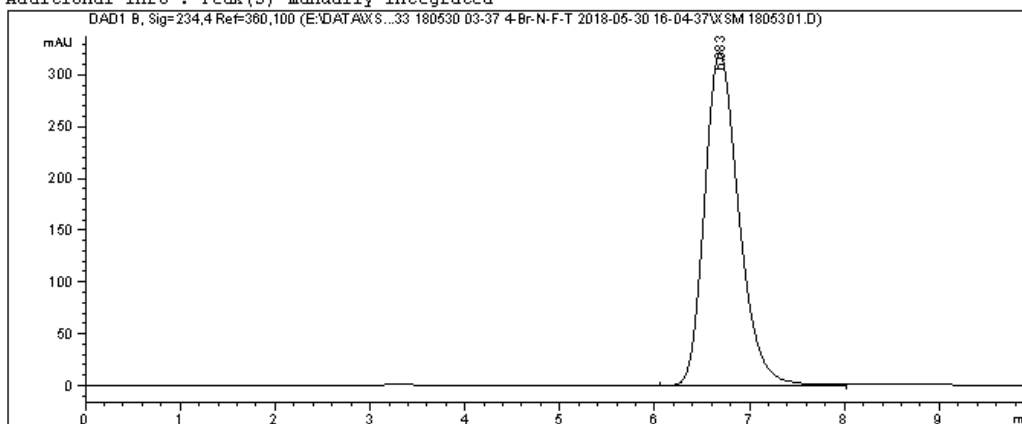

# Area Percent Report

```
Sorted By      : Signal
Multiplier     : 1.0000
Dilution       : 1.0000
Do not use Multiplier & Dilution Factor with ISTDs
```

Signal 1: DAD1 B, Sig=234,4 Ref=360,100

| Peak # | RetTime [min] | Type | Width [min] | Area [mAU*s] | Height [mAU] | Area %   |
|--------|---------------|------|-------------|--------------|--------------|----------|
| 1      | 6.683         | BB   | 0.3810      | 8027.47363   | 321.83548    | 100.0000 |

Totals : 8027.47363 321.83548

\*\*\* End of Report \*\*\*

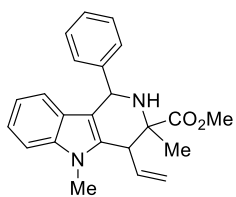

(1*R*\*,3*S*\*,4*R*\*)-3k

Data File E:\DATA\XSM\In33 180427 03-16 Ar-Ph 2018-04-27 21-46-08\XSM-20180427 Ar-Ph1.D  
 Sample Name: In33 03-16 Ar-Ph 1st rac

```
=====
Acq. Operator   : SYSTEM                      Seq. Line :    2
Acq. Instrument : 1260                      Location  :   19
Injection Date  : 4/27/2018 10:12:58 PM      Inj       :    1
                                           Inj Volume: 5.000 µl
Acq. Method     : E:\DATA\XSM\In33 180427 03-16 Ar-Ph 2018-04-27 21-46-08\In33 1st rac 0.5mL
                                           234nm noD.M
Last changed    : 4/27/2018 9:46:08 PM by SYSTEM
Analysis Method : E:\DATA\XSM\In33 180427 03-16 Ar-Ph 2018-04-27 21-46-08\In33 1st rac 0.5mL
                                           234nm noD.M (Sequence Method)
Last changed    : 10/8/2018 2:44:20 PM by SYSTEM
                                           (modified after loading)
Additional Info : Peak(s) manually integrated
```

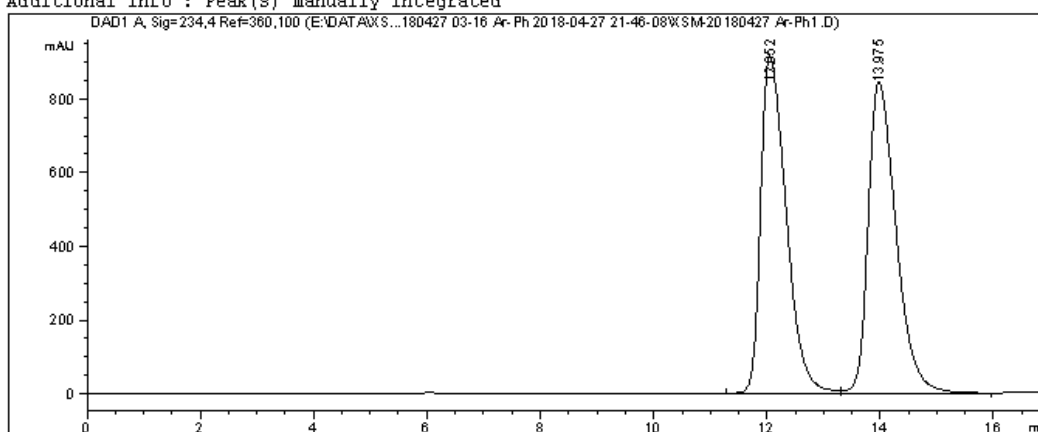

=====  
 Area Percent Report  
 =====

```
Sorted By      :      Signal
Multiplier     :      1.0000
Dilution       :      1.0000
Do not use Multiplier & Dilution Factor with ISTDs
```

Signal 1: DAD1 A, Sig=234,4 Ref=360,100

| Peak # | RetTime [min] | Type | Width [min] | Area [mAU*s] | Height [mAU] | Area %  |
|--------|---------------|------|-------------|--------------|--------------|---------|
| 1      | 12.052        | BV   | 0.4986      | 2.86482e4    | 916.64539    | 49.8368 |
| 2      | 13.975        | VB   | 0.5341      | 2.88358e4    | 845.15515    | 50.1632 |

Totals :                    5.74840e4 1761.80054

=====  
 \*\*\* End of Report \*\*\*

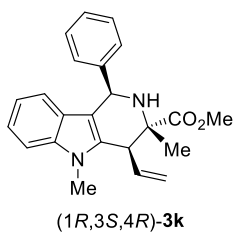

Data File E:\DATA\XSM\In33 180427 03-16 Ar-Ph 2018-04-27 21-46-08\XSM-20180427 Ar-Ph.D  
 Sample Name: In33 03-16 Ar-Ph L+R opt

```

=====
Acq. Operator   : SYSTEM                      Seq. Line :    1
Acq. Instrument : 1260                      Location  :   18
Injection Date  : 4/27/2018 9:47:03 PM      Inj       :    1
                                           Inj Volume: 5.000 µl

Acq. Method     : E:\DATA\XSM\In33 180427 03-16 Ar-Ph 2018-04-27 21-46-08\In33 1st rac 0.5mL
                  234nm noD.M
Last changed    : 4/27/2018 9:46:08 PM by SYSTEM
Analysis Method : E:\DATA\XSM\In33 180427 03-16 Ar-Ph 2018-04-27 21-46-08\In33 1st rac 0.5mL
                  234nm noD.M (Sequence Method)
Last changed    : 10/8/2018 2:44:20 PM by SYSTEM
                  (modified after loading)
Additional Info : Peak(s) manually integrated
  
```

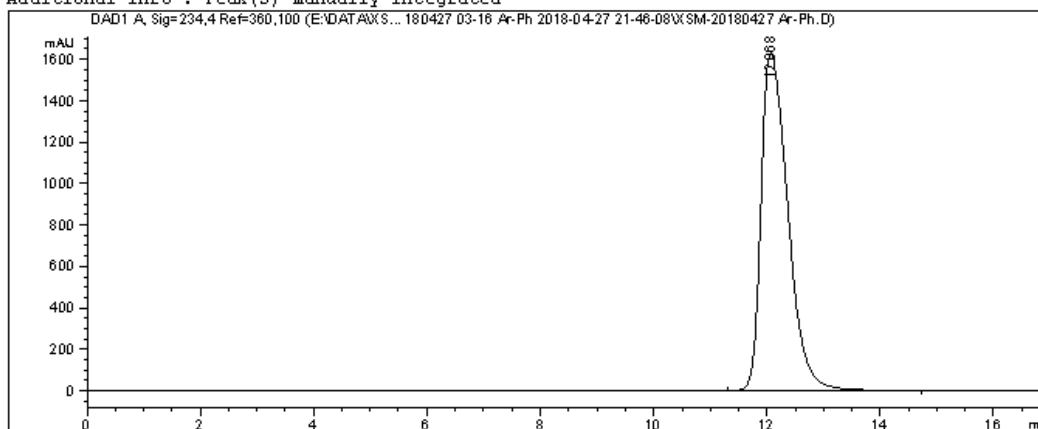

```

=====
                        Area Percent Report
=====
  
```

```

Sorted By      :      Signal
Multiplier     :      1.0000
Dilution       :      1.0000
Do not use Multiplier & Dilution Factor with ISTDs
  
```

Signal 1: DAD1 A, Sig=234,4 Ref=360,100

| Peak # | RetTime [min] | Type | Width [min] | Area [mAU*s] | Height [mAU] | Area %   |
|--------|---------------|------|-------------|--------------|--------------|----------|
| 1      | 12.068        | BB   | 0.5253      | 5.35665e4    | 1630.49695   | 100.0000 |

Totals : 5.35665e4 1630.49695

```

=====
                        *** End of Report ***
  
```

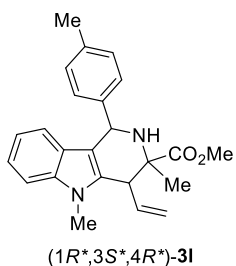

Data File E:\DATA\XSM\In33 180521 03-30 24-MeC6H4 2018-05-21 11-01-15\XSM 03-30.D  
Sample Name: In33 03-30 4-Me 1st rac

```

=====
Acq. Operator   : SYSTEM                      Seq. Line :    1
Acq. Instrument : 1260                      Location  :   15
Injection Date  : 5/21/2018 11:02:11 AM      Inj       :    1
                                           Inj Volume: 5.000 µl

Acq. Method     : E:\DATA\XSM\In33 180521 03-30 24-MeC6H4 2018-05-21 11-01-15\In33 AS-98-2-
                  254nm-20min-noD 24-MeC6H4.M
Last changed    : 5/21/2018 11:01:16 AM by SYSTEM
Analysis Method : E:\DATA\XSM\In33 180521 03-30 24-MeC6H4 2018-05-21 11-01-15\In33 AS-98-2-
                  254nm-20min-noD 24-MeC6H4.M (Sequence Method)
Last changed    : 10/8/2018 2:56:33 PM by SYSTEM
                  (modified after loading)

Additional Info : Peak(s) manually integrated
  
```

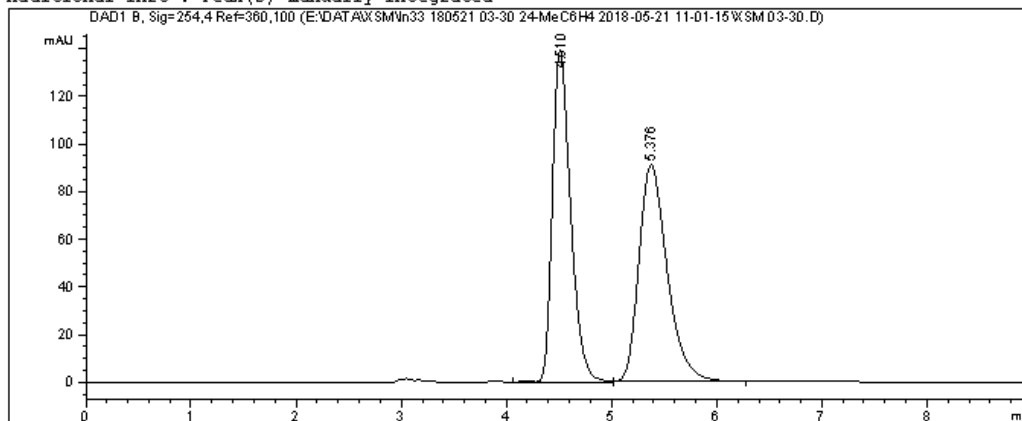

=====  
Area Percent Report  
=====

Sorted By : Signal  
Multiplier : 1.0000  
Dilution : 1.0000  
Do not use Multiplier & Dilution Factor with ISTDs

Signal 1: DAD1 B, Sig=254,4 Ref=360,100

| Peak # | RetTime [min] | Type | Width [min] | Area [mAU*s] | Height [mAU] | Area %  |
|--------|---------------|------|-------------|--------------|--------------|---------|
| 1      | 4.510         | VV R | 0.1836      | 1667.88477   | 139.35078    | 49.5538 |
| 2      | 5.376         | VB   | 0.2858      | 1697.92041   | 90.93706     | 50.4462 |

Totals : 3365.80518 230.28784

=====  
\*\*\* End of Report \*\*\*

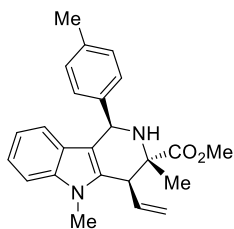

(1R,3S,4R)-3I

Data File E:\DATA\XSM\In33 180521 03-30 24-MeC6H4 2018-05-21 11-01-15\XSM 03-301.D  
Sample Name: In33 03-30 4-Me R+L opt

```
=====
Acq. Operator   : SYSTEM                      Seq. Line :    2
Acq. Instrument : 1260                      Location  :   16
Injection Date  : 5/21/2018 11:23:05 AM      Inj       :    1
                                           Inj Volume: 5.000 µl

Acq. Method     : E:\DATA\XSM\In33 180521 03-30 24-MeC6H4 2018-05-21 11-01-15\In33 AS-98-2-
                  254nm-20min-noD 24-MeC6H4.M
Last changed    : 5/21/2018 11:01:16 AM by SYSTEM
Analysis Method : E:\DATA\XSM\In33 180521 03-30 24-MeC6H4 2018-05-21 11-01-15\In33 AS-98-2-
                  254nm-20min-noD 24-MeC6H4.M (Sequence Method)
Last changed    : 10/8/2018 2:56:33 PM by SYSTEM
                  (modified after loading)
Additional Info : Peak(s) manually integrated
```

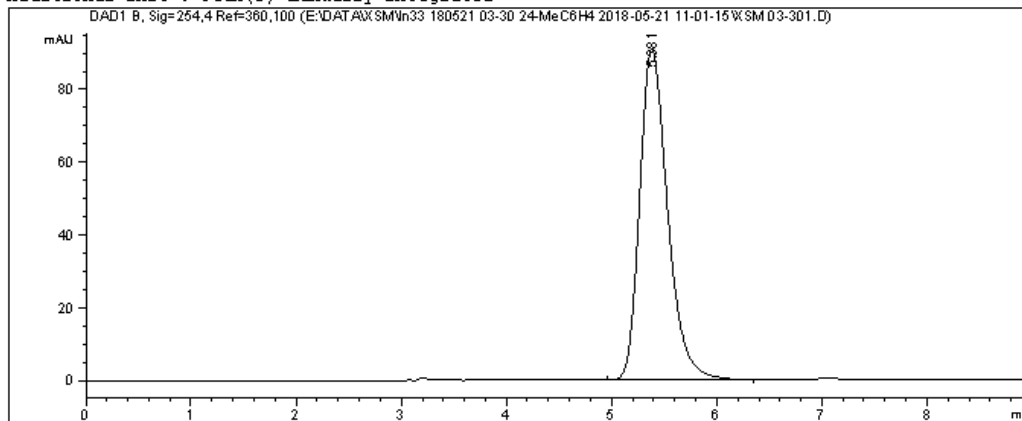

# Area Percent Report

```
Sorted By      : Signal
Multiplier     : 1.0000
Dilution       : 1.0000
Do not use Multiplier & Dilution Factor with ISTDs
```

Signal 1: DAD1 B, Sig=254,4 Ref=360,100

| Peak # | RetTime [min] | Type | Width [min] | Area [mAU*s] | Height [mAU] | Area %   |
|--------|---------------|------|-------------|--------------|--------------|----------|
| 1      | 5.381         | BB   | 0.2827      | 1671.62366   | 90.83202     | 100.0000 |

Totals : 1671.62366 90.83202

\*\*\* End of Report \*\*\*

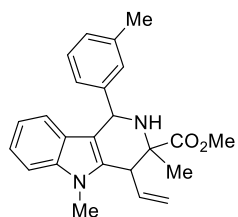

(1R\*,3S\*,4R\*)-3m

Data File E:\DATA\XSM\In33 180520 03-30 234-Me 2018-05-20 21-58-45\XSM 03-302.D  
Sample Name: In33 03-30 3-Me 1st rac

```
=====
Acq. Operator   : SYSTEM                      Seq. Line :    3
Acq. Instrument : 1260                      Location  :   17
Injection Date  : 5/20/2018 11:01:32 PM      Inj       :    1
                                           Inj Volume: 5.000 µl

Acq. Method     : E:\DATA\XSM\In33 180520 03-30 234-Me 2018-05-20 21-58-45\In33 1st 0.5mL
                  234nm 30min noD.M
Last changed    : 5/20/2018 9:58:45 PM by SYSTEM
Analysis Method : E:\DATA\XSM\In33 180520 03-30 234-Me 2018-05-20 21-58-45\In33 1st 0.5mL
                  234nm 30min noD.M (Sequence Method)
Last changed    : 10/8/2018 2:55:00 PM by SYSTEM
                  (modified after loading)
Additional Info : Peak(s) manually integrated
DAD1 B, Sig=234,4 Ref=360,100 (E:\DATA\XSM\In33 180520 03-30 234-Me 2018-05-20 21-58-45\XSM 03-302.D)
```

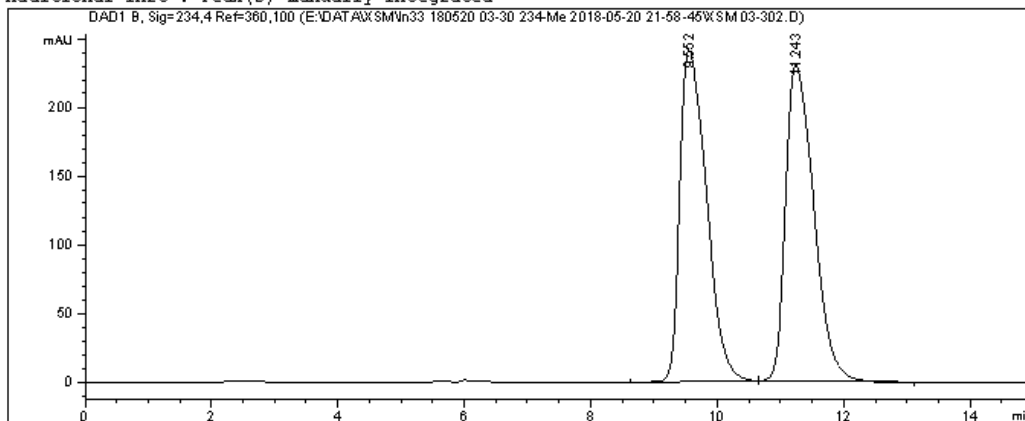

# Area Percent Report

```
Sorted By      : Signal
Multiplier     : 1.0000
Dilution       : 1.0000
Do not use Multiplier & Dilution Factor with ISTDs
```

Signal 1: DAD1 B, Sig=234,4 Ref=360,100

| Peak # | RetTime [min] | Type | Width [min] | Area [mAU*s] | Height [mAU] | Area %  |
|--------|---------------|------|-------------|--------------|--------------|---------|
| 1      | 9.552         | BB   | 0.4792      | 7064.94580   | 241.58951    | 49.7243 |
| 2      | 11.243        | BB   | 0.5015      | 7143.29785   | 230.54137    | 50.2757 |

Totals : 1.42082e4 472.13087

\*\*\* End of Report \*\*\*

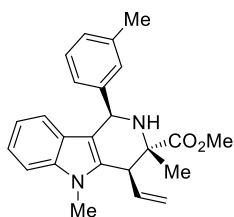

(1R,3S,4R)-3m

Data File E:\DATA\XSM\In33 180520 03-30 234-Me 2018-05-20 21-58-45\XSM 03-303.D  
 Sample Name: In33 03-29 3-Me R+L opt

```
=====
Acq. Operator   : SYSTEM                      Seq. Line :    4
Acq. Instrument : 1260                      Location  :   18
Injection Date  : 5/20/2018 11:32:30 PM      Inj       :    1
                                           Inj Volume: 5.000 µl

Acq. Method     : E:\DATA\XSM\In33 180520 03-30 234-Me 2018-05-20 21-58-45\In33 1st 0.5mL
                  234nm 30min noD.M
Last changed    : 5/20/2018 9:58:45 PM by SYSTEM
Analysis Method : E:\DATA\XSM\In33 180520 03-30 234-Me 2018-05-20 21-58-45\In33 1st 0.5mL
                  234nm 30min noD.M (Sequence Method)
Last changed    : 10/8/2018 2:55:00 PM by SYSTEM
                  (modified after loading)
Additional Info : Peak(s) manually integrated
```

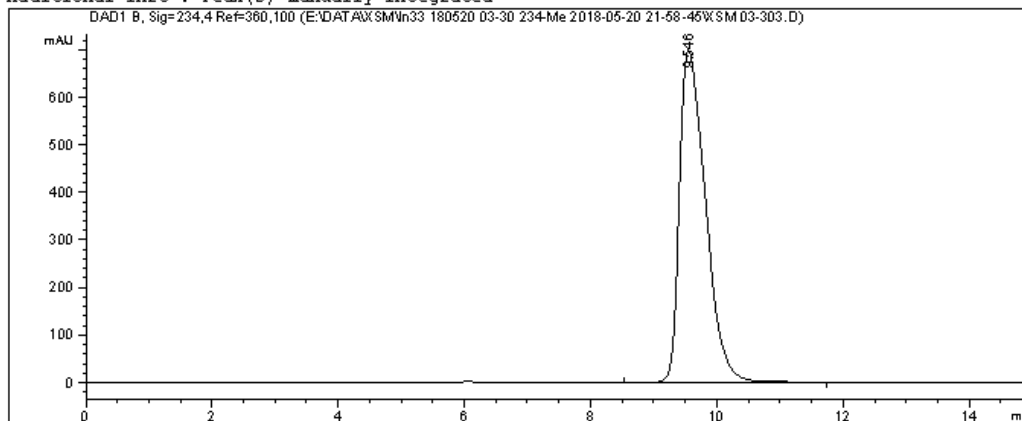

# Area Percent Report

```
Sorted By      : Signal
Multiplier     : 1.0000
Dilution       : 1.0000
Do not use Multiplier & Dilution Factor with ISTDs
```

Signal 1: DAD1 B, Sig=234,4 Ref=360,100

| Peak # | RetTime [min] | Type | Width [min] | Area [mAU*s] | Height [mAU] | Area %   |
|--------|---------------|------|-------------|--------------|--------------|----------|
| 1      | 9.546         | BB   | 0.4467      | 2.00753e4    | 699.69135    | 100.0000 |

Totals : 2.00753e4 699.69135

\*\*\* End of Report \*\*\*

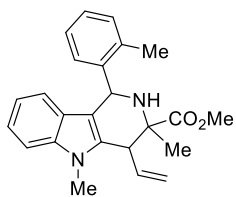

(1R\*,3S\*,4R\*)-3n

Data File E:\DATA\XS...3 190101 03-30 2-Me IC-IA-0.5mL 2019-01-01 22-35-13\XSM 201901012.D  
Sample Name: In33 03-30 2-Me 1st rac IC-IA

```
=====
Acq. Operator   : SYSTEM                      Seq. Line :    3
Acq. Instrument : 1260                      Location  :   80
Injection Date  : 1/1/2019 11:19:01 PM       Inj       :    1
                                           Inj Volume: 5.000 µl
Acq. Method     : E:\DATA\XSM\In33 190101 03-30 2-Me IC-IA-0.5mL 2019-01-01 22-35-13\In33 IC-
IA 99-0.5mL-30min-234nm 2-Me rac.M
Last changed    : 1/1/2019 10:35:13 PM by SYSTEM
Analysis Method : E:\DATA\XSM\In33 190101 03-30 2-Me IC-IA-0.5mL 2019-01-01 22-35-13\In33 IC-
IA 99-0.5mL-30min-234nm 2-Me rac.M (Sequence Method)
Last changed    : 1/2/2019 10:46:28 AM by SYSTEM
                  (modified after loading)
Additional Info : Peak(s) manually integrated
```

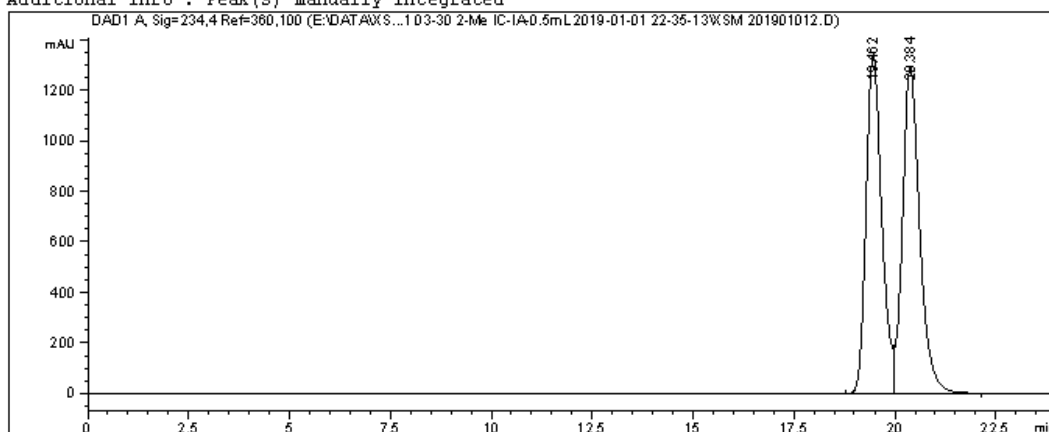

=====  
Area Percent Report  
=====

Sorted By : Signal  
Multiplier : 1.0000  
Dilution : 1.0000  
Do not use Multiplier & Dilution Factor with ISTDs

Signal 1: DAD1 A, Sig=234,4 Ref=360,100

| Peak # | RetTime [min] | Type | Width [min] | Area [mAU*s] | Height [mAU] | Area %  |
|--------|---------------|------|-------------|--------------|--------------|---------|
| 1      | 19.462        | BV   | 0.4037      | 3.60135e4    | 1343.62476   | 48.3725 |
| 2      | 20.384        | VB   | 0.4490      | 3.84368e4    | 1292.40662   | 51.6275 |

Totals : 7.44502e4 2636.03137

=====  
\*\*\* End of Report \*\*\*

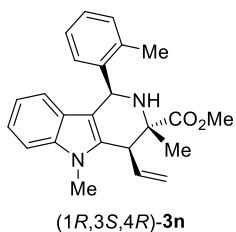

Data File E:\DATA\XS...33 190101 03-30 2-Me IC-IA-0.5mL 2019-01-01 22-35-13\XSM 20190101.D  
Sample Name: In33 03-30 2-Me R+L opt IC-IA

```
=====
Acq. Operator   : SYSTEM                      Seq. Line :    1
Acq. Instrument : 1260                      Location  :   79
Injection Date  : 1/1/2019 10:36:37 PM       Inj       :    1
                                           Inj Volume: 5.000 µl

Acq. Method     : E:\DATA\XSM\In33 190101 03-30 2-Me IC-IA-0.5mL 2019-01-01 22-35-13\In33 IC-
IA 99-0.5mL-30min-234nm 2-Me rac.M
Last changed    : 1/1/2019 10:35:13 PM by SYSTEM
Analysis Method : E:\DATA\XSM\In33 190101 03-30 2-Me IC-IA-0.5mL 2019-01-01 22-35-13\In33 IC-
IA 99-0.5mL-30min-234nm 2-Me rac.M (Sequence Method)
Last changed    : 1/2/2019 10:46:28 AM by SYSTEM
                  (modified after loading)
Additional Info : Peak(s) manually integrated
```

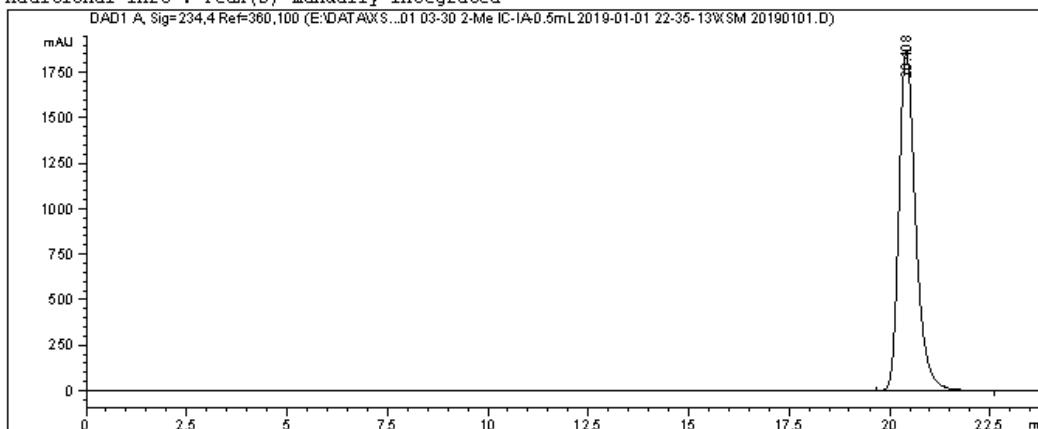

```
=====
                          Area Percent Report
=====
```

```
Sorted By      :      Signal
Multiplier     :      1.0000
Dilution       :      1.0000
Do not use Multiplier & Dilution Factor with ISTDs
```

Signal 1: DAD1 A, Sig=234,4 Ref=360,100

| Peak # | RetTime [min] | Type | Width [min] | Area [mAU*s] | Height [mAU] | Area %   |
|--------|---------------|------|-------------|--------------|--------------|----------|
| 1      | 20.408        | BB   | 0.3919      | 5.39703e4    | 1863.31104   | 100.0000 |

Totals :                    5.39703e4 1863.31104

```
=====
*** End of Report ***
```

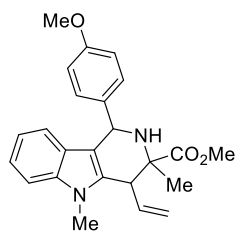

(1*R*\*,3*S*\*,4*R*\*)-3o

Data File E:\DATA\XSM\In33 180529 4MeO-Fur-Thien 2018-05-29 16-49-01\XSM 180529.D  
 Sample Name: In33 03-37 4-MeO 1st rac

```
=====
Acq. Operator   : SYSTEM                      Seq. Line :    1
Acq. Instrument : 1260                      Location  :   15
Injection Date  : 5/29/2018 4:50:01 PM        Inj       :    1
                                           Inj Volume: 5.000 µl
Acq. Method     : E:\DATA\XSM\In33 180529 4MeO-Fur-Thien 2018-05-29 16-49-01\In33 1st rac 0.
                                           5mL 234nm noD.M
Last changed    : 5/29/2018 4:49:02 PM by SYSTEM
Analysis Method : E:\DATA\XSM\In33 180529 4MeO-Fur-Thien 2018-05-29 16-49-01\In33 1st rac 0.
                                           5mL 234nm noD.M (Sequence Method)
Last changed    : 10/8/2018 2:46:26 PM by SYSTEM
                                           (modified after loading)
Additional Info : Peak(s) manually integrated
```

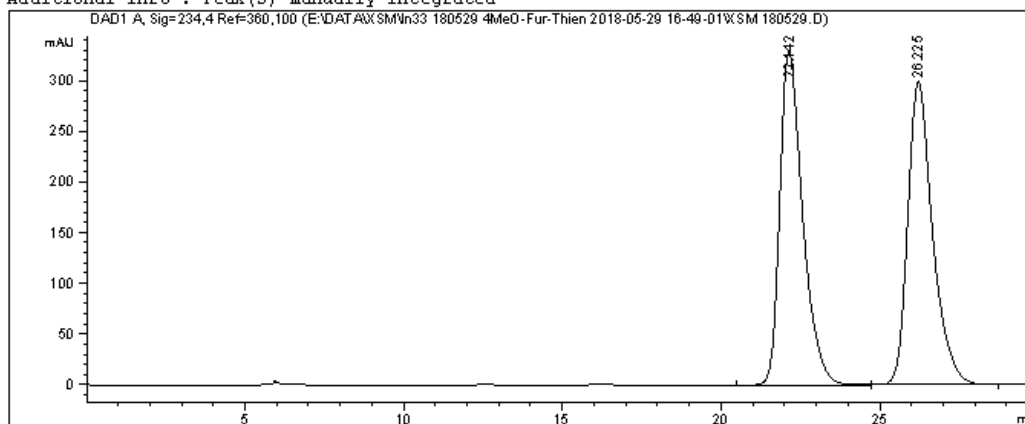

# Area Percent Report

```
Sorted By      : Signal
Multiplier     : 1.0000
Dilution       : 1.0000
Do not use Multiplier & Dilution Factor with ISTDs
```

Signal 1: DAD1 A, Sig=234,4 Ref=360,100

| Peak # | RetTime [min] | Type | Width [min] | Area [mAU*s] | Height [mAU] | Area %  |
|--------|---------------|------|-------------|--------------|--------------|---------|
| 1      | 22.142        | BB   | 0.7523      | 1.64949e4    | 328.21844    | 50.3150 |
| 2      | 26.225        | BB   | 0.8216      | 1.62884e4    | 298.95908    | 49.6850 |

Totals : 3.27833e4 627.17752

\*\*\* End of Report \*\*\*

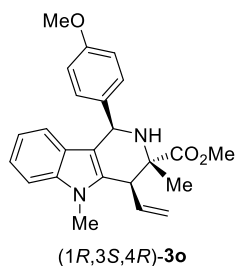

Data File E:\DATA\XSM\In33 180529 4MeO-Fur-Thien 2018-05-29 16-49-01\XSM 1805291.D  
Sample Name: In33 03-36 4-MeO R+L opt

```
=====
Acq. Operator   : SYSTEM                      Seq. Line :    2
Acq. Instrument : 1260                      Location  :   16
Injection Date  : 5/29/2018 5:20:57 PM       Inj       :    1
                                           Inj Volume: 5.000 µl
Acq. Method     : E:\DATA\XSM\In33 180529 4MeO-Fur-Thien 2018-05-29 16-49-01\In33 1st rac 0.
                                           5mL 234nm noD.M
Last changed    : 5/29/2018 4:49:02 PM by SYSTEM
Analysis Method : E:\DATA\XSM\In33 180529 4MeO-Fur-Thien 2018-05-29 16-49-01\In33 1st rac 0.
                                           5mL 234nm noD.M (Sequence Method)
Last changed    : 10/8/2018 2:46:26 PM by SYSTEM
                                           (modified after loading)
Additional Info  : Peak(s) manually integrated
```

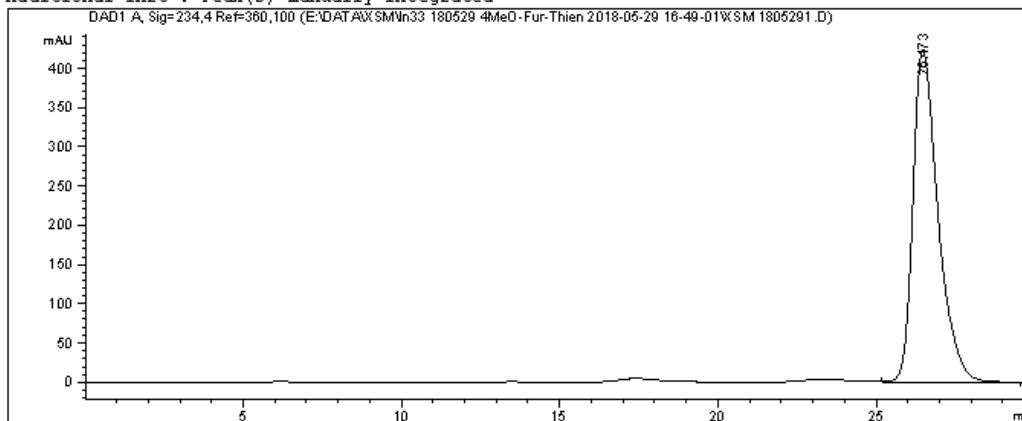

# Area Percent Report

```
Sorted By      : Signal
Multiplier     : 1.0000
Dilution       : 1.0000
Do not use Multiplier & Dilution Factor with ISTDs
```

Signal 1: DAD1 A, Sig=234,4 Ref=360,100

| Peak # | RetTime [min] | Type | Width [min] | Area [mAU*s] | Height [mAU] | Area %   |
|--------|---------------|------|-------------|--------------|--------------|----------|
| 1      | 26.473        | BB   | 0.8327      | 2.33045e4    | 423.06076    | 100.0000 |

Totals : 2.33045e4 423.06076

\*\*\* End of Report \*\*\*

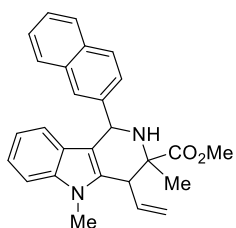

(1R\*,3S\*,4R\*)-3p

Data File E:\DATA\XSM\In33 190103 03-36 Naphthyl 1st 2019-01-03 10-25-13\XSM 201901022.D  
Sample Name: In33 03-37 Naphthyl 1st rac

```
=====
Acq. Operator   : SYSTEM                      Seq. Line :    3
Acq. Instrument : 1260                      Location  :   70
Injection Date  : 1/3/2019 10:58:14 AM      Inj       :    1
                                           Inj Volume: 5.000 µl

Acq. Method     : E:\DATA\XSM\In33 190103 03-36 Naphthyl 1st 2019-01-03 10-25-13\In33 AS-98-
                  254nm-20min Naphthyl 1st.M
Last changed    : 1/3/2019 10:25:14 AM by SYSTEM
Analysis Method : E:\DATA\XSM\In33 190103 03-36 Naphthyl 1st 2019-01-03 10-25-13\In33 AS-98-
                  254nm-20min Naphthyl 1st.M (Sequence Method)
Last changed    : 1/3/2019 11:36:17 AM by SYSTEM
                  (modified after loading)
Additional Info  : Peak(s) manually integrated
=====
```

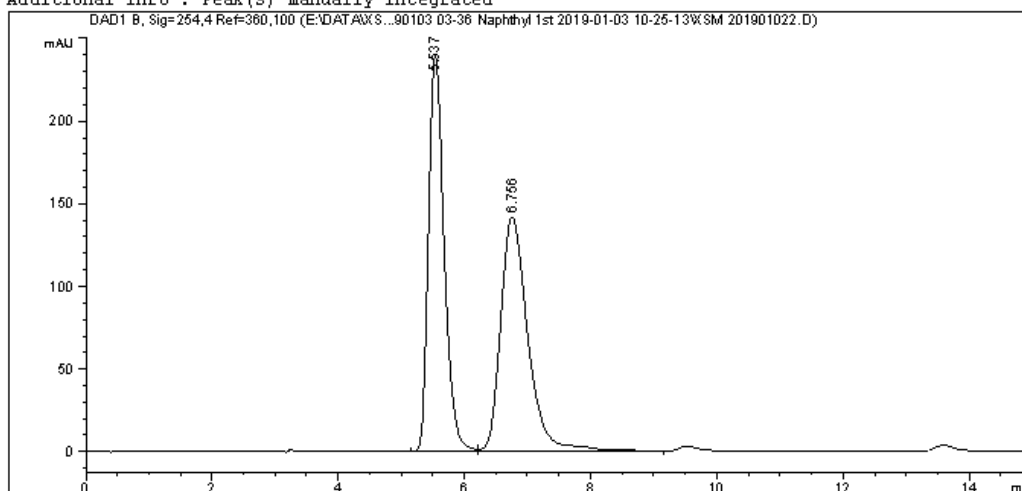

# Area Percent Report

```
Sorted By      : Signal
Multiplier     : 1.0000
Dilution       : 1.0000
Do not use Multiplier & Dilution Factor with ISTDs
```

Signal 1: DAD1 B, Sig=254,4 Ref=360,100

| Peak # | RetTime [min] | Type | Width [min] | Area [mAU*s] | Height [mAU] | Area %  |
|--------|---------------|------|-------------|--------------|--------------|---------|
| 1      | 5.537         | BV   | 0.2647      | 4113.77148   | 239.17046    | 49.2677 |
| 2      | 6.756         | VB   | 0.4562      | 4236.06104   | 141.91727    | 50.7323 |

Totals : 8349.83252 381.08772

\*\*\* End of Report \*\*\*

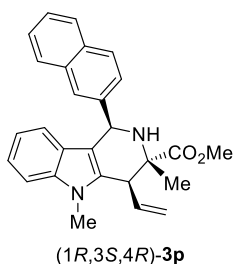

Data File E:\DATA\XSM\In33 190103 03-36 Naphthyl 1st 2019-01-03 10-25-13\XSM 20190102.D  
Sample Name: In33 03-36 Naphthyl R+L opt

```
=====
Acq. Operator   : SYSTEM                      Seq. Line :    1
Acq. Instrument : 1260                      Location  :   69
Injection Date  : 1/3/2019 10:26:13 AM       Inj       :    1
                                           Inj Volume: 5.000 µl

Acq. Method     : E:\DATA\XSM\In33 190103 03-36 Naphthyl 1st 2019-01-03 10-25-13\In33 AS-98-
                  254nm-20min Naphthyl 1st.M
Last changed    : 1/3/2019 10:25:14 AM by SYSTEM
Analysis Method : E:\DATA\XSM\In33 190103 03-36 Naphthyl 1st 2019-01-03 10-25-13\In33 AS-98-
                  254nm-20min Naphthyl 1st.M (Sequence Method)
Last changed    : 1/3/2019 11:36:17 AM by SYSTEM
                  (modified after loading)
Additional Info  : Peak(s) manually integrated
```

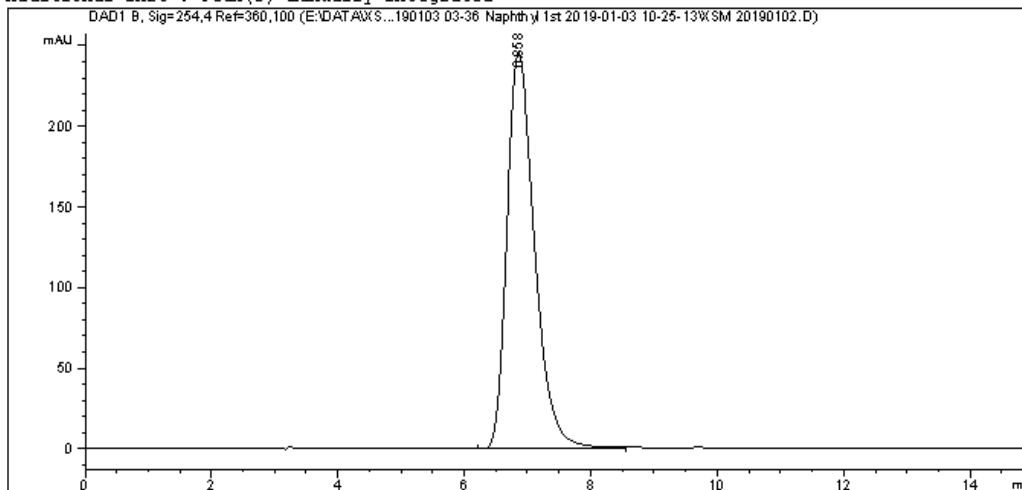

=====  
Area Percent Report  
=====

```
Sorted By      :      Signal
Multiplier     :      1.0000
Dilution       :      1.0000
Do not use Multiplier & Dilution Factor with ISTDs
```

Signal 1: DAD1 B, Sig=254,4 Ref=360,100

| Peak # | RetTime [min] | Type | Width [min] | Area [mAU*s] | Height [mAU] | Area %   |
|--------|---------------|------|-------------|--------------|--------------|----------|
| 1      | 6.858         | BB   | 0.4620      | 7405.11865   | 245.46161    | 100.0000 |

Totals :                    7405.11865   245.46161

=====  
\*\*\* End of Report \*\*\*

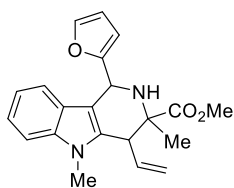

(1R\*,3S\*,4R\*)-3q

Data File E:\DATA\XSM\In33 180530 03-37 4-Br-N-F-T 2018-05-30 16-04-37\XSM 1805304.D  
Sample Name: In33 03-37 Furyl 1st rac

```
=====
Acq. Operator   : SYSTEM                      Seq. Line :    5
Acq. Instrument : 1260                      Location  :   17
Injection Date  : 5/30/2018 5:29:19 PM        Inj       :    1
                                           Inj Volume: 5.000 µl

Acq. Method     : E:\DATA\XSM\In33 180530 03-37 4-Br-N-F-T 2018-05-30 16-04-37\In33 AS-98-2-
                  234nm-20min-noD.M
Last changed    : 5/30/2018 4:04:37 PM by SYSTEM
Analysis Method : E:\DATA\XSM\In33 180530 03-37 4-Br-N-F-T 2018-05-30 16-04-37\In33 AS-98-2-
                  234nm-20min-noD.M (Sequence Method)
Last changed    : 10/7/2018 9:56:46 PM by SYSTEM
                  (modified after loading)
Additional Info : Peak(s) manually integrated
```

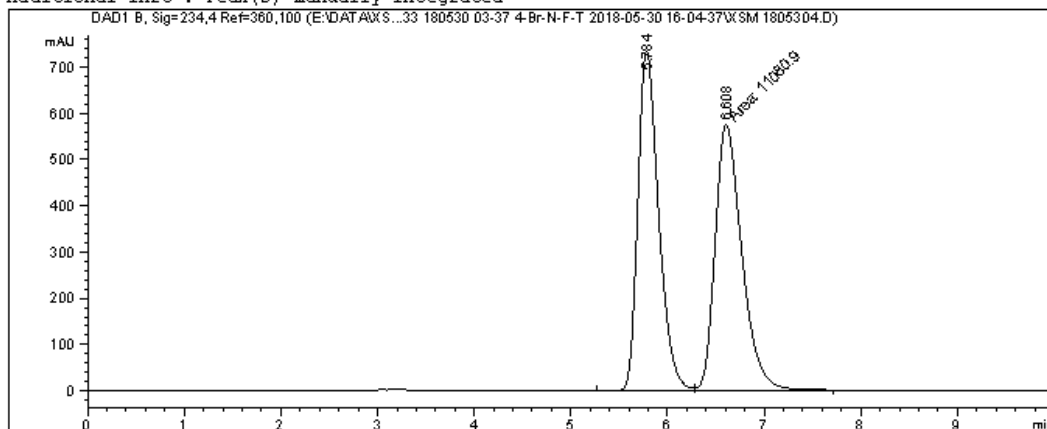

=====  
Area Percent Report  
=====

Sorted By : Signal  
Multiplier : 1.0000  
Dilution : 1.0000  
Do not use Multiplier & Dilution Factor with ISTDs

Signal 1: DAD1 B, Sig=234,4 Ref=360,100

| Peak # | RetTime [min] | Type | Width [min] | Area [mAU*s] | Height [mAU] | Area %  |
|--------|---------------|------|-------------|--------------|--------------|---------|
| 1      | 5.784         | BV   | 0.2282      | 1.09642e4    | 734.11713    | 49.7352 |
| 2      | 6.608         | MF   | 0.3208      | 1.10809e4    | 575.60492    | 50.2648 |

Totals : 2.20451e4 1309.72205

=====  
\*\*\* End of Report \*\*\*

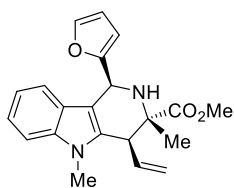

(1R,3S,4R)-3q

Data File E:\DATA\XSM\In33 180530 03-37 4-Br-N-F-T 2018-05-30 16-04-37\XSM 1805305.D  
Sample Name: In33 03-36 Furyl R+L opt

```
=====
Acq. Operator   : SYSTEM                      Seq. Line :    6
Acq. Instrument : 1260                      Location  :   18
Injection Date  : 5/30/2018 5:50:16 PM       Inj       :    1
                                           Inj Volume: 5.000 µl

Acq. Method     : E:\DATA\XSM\In33 180530 03-37 4-Br-N-F-T 2018-05-30 16-04-37\In33 AS-98-2-
                  234nm-20min-noD.M
Last changed    : 5/30/2018 4:04:37 PM by SYSTEM
Analysis Method : E:\DATA\XSM\In33 180530 03-37 4-Br-N-F-T 2018-05-30 16-04-37\In33 AS-98-2-
                  234nm-20min-noD.M (Sequence Method)
Last changed    : 10/7/2018 9:56:46 PM by SYSTEM
                  (modified after loading)
Additional Info : Peak(s) manually integrated
```

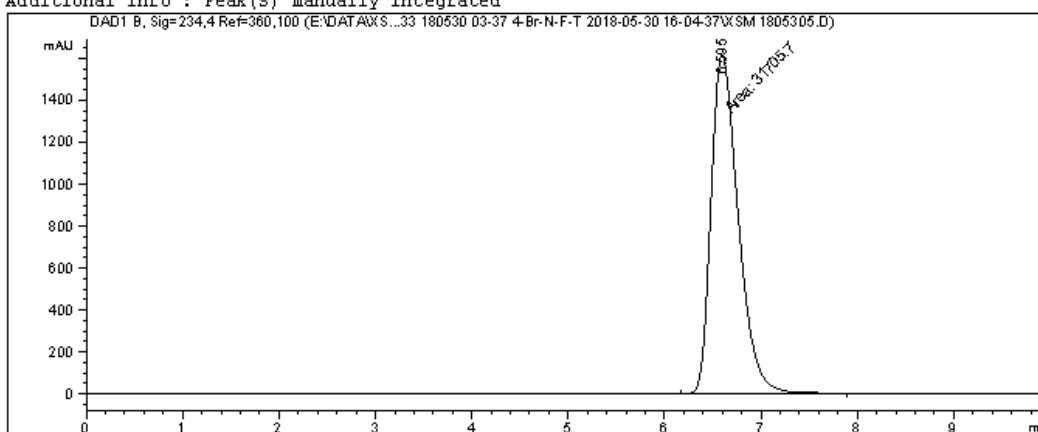

```
=====
                          Area Percent Report
=====
```

```
Sorted By      :      Signal
Multiplier     :      1.0000
Dilution       :      1.0000
Do not use Multiplier & Dilution Factor with ISTDs
```

Signal 1: DAD1 B, Sig=234,4 Ref=360,100

| Peak # | RetTime [min] | Type | Width [min] | Area [mAU*s] | Height [mAU] | Area %   |
|--------|---------------|------|-------------|--------------|--------------|----------|
| 1      | 6.595         | MF   | 0.3275      | 3.17057e4    | 1613.70227   | 100.0000 |

Totals : 3.17057e4 1613.70227

```
=====
*** End of Report ***
```

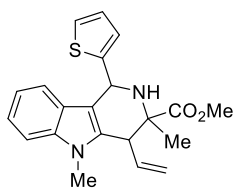

(1*R*\*,3*S*\*,4*R*\*)-3r

Data File E:\DATA\XSM\In33 180530 03-37 4-Br-N-F-T 2018-05-30 16-04-37\XSM 1805306.D  
 Sample Name: In33 03-37 Thienyl 1st rac

```

=====
Acq. Operator   : SYSTEM                      Seq. Line :    7
Acq. Instrument : 1260                      Location  :   19
Injection Date  : 5/30/2018 6:11:11 PM      Inj       :    1
                                           Inj Volume: 5.000 µl
Acq. Method     : E:\DATA\XSM\In33 180530 03-37 4-Br-N-F-T 2018-05-30 16-04-37\In33 AS-98-2-
                  234nm-20min-noD.M
Last changed    : 5/30/2018 4:04:37 PM by SYSTEM
Analysis Method : E:\DATA\XSM\In33 180530 03-37 4-Br-N-F-T 2018-05-30 16-04-37\In33 AS-98-2-
                  234nm-20min-noD.M (Sequence Method)
Last changed    : 10/8/2018 3:09:43 PM by SYSTEM
                  (modified after loading)
Additional Info : Peak(s) manually integrated
  
```

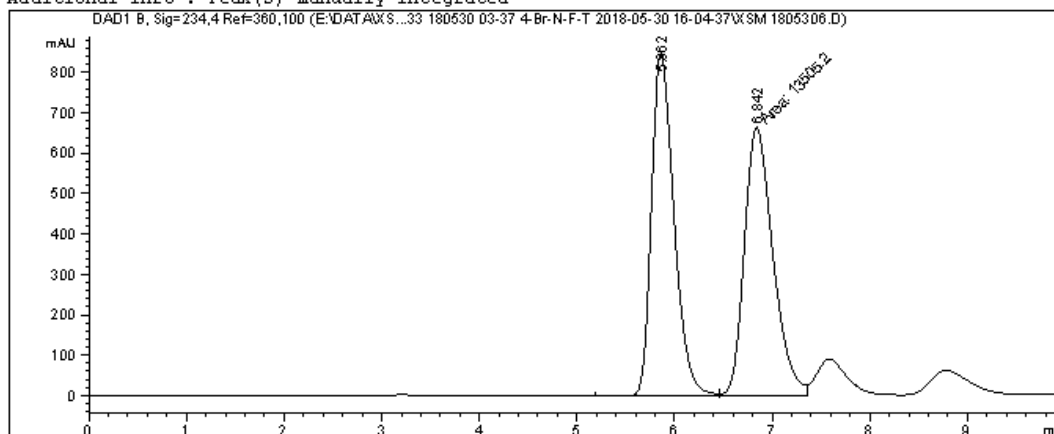

# Area Percent Report

```

Sorted By      :      Signal
Multiplier     :      1.0000
Dilution       :      1.0000
Do not use Multiplier & Dilution Factor with ISTDs
  
```

Signal 1: DAD1 B, Sig=234,4 Ref=360,100

| Peak # | RetTime [min] | Type | Width [min] | Area [mAU*s] | Height [mAU] | Area %  |
|--------|---------------|------|-------------|--------------|--------------|---------|
| 1      | 5.862         | BV   | 0.2444      | 1.35542e4    | 848.46832    | 50.0906 |
| 2      | 6.842         | MF   | 0.3389      | 1.35052e4    | 664.23364    | 49.9094 |

Totals : 2.70594e4 1512.70197

\*\*\* End of Report \*\*\*

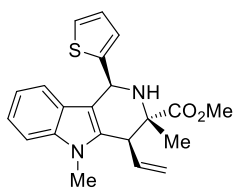

(1R,3S,4R)-3r

Data File E:\DATA\XSM\In33 180530 03-37 4-Br-N-F-T 2018-05-30 16-04-37\XSM 1805307.D  
Sample Name: In33 03-36 Thienyl R+L opt

```
=====
Acq. Operator   : SYSTEM                      Seq. Line :    8
Acq. Instrument : 1260                      Location  :   20
Injection Date  : 5/30/2018 6:32:11 PM        Inj       :    1
                                           Inj Volume: 5.000 µl
Acq. Method     : E:\DATA\XSM\In33 180530 03-37 4-Br-N-F-T 2018-05-30 16-04-37\In33 AS-98-2-
                  234nm-20min-noD.M
Last changed    : 5/30/2018 4:04:37 PM by SYSTEM
Analysis Method : E:\DATA\XSM\In33 180530 03-37 4-Br-N-F-T 2018-05-30 16-04-37\In33 AS-98-2-
                  234nm-20min-noD.M (Sequence Method)
Last changed    : 10/8/2018 3:09:43 PM by SYSTEM
                  (modified after loading)
Additional Info : Peak(s) manually integrated
```

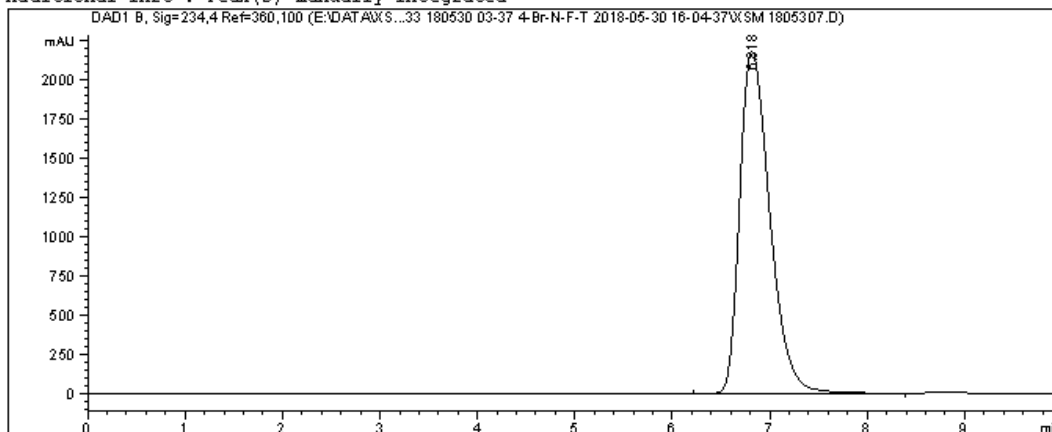

```
=====
                          Area Percent Report
=====
```

```
Sorted By      :      Signal
Multiplier     :      1.0000
Dilution       :      1.0000
Do not use Multiplier & Dilution Factor with ISTDs
```

Signal 1: DAD1 B, Sig=234,4 Ref=360,100

| Peak # | RetTime [min] | Type | Width [min] | Area [mAU*s] | Height [mAU] | Area %   |
|--------|---------------|------|-------------|--------------|--------------|----------|
| 1      | 6.818         | BB   | 0.3306      | 4.68628e4    | 2181.35010   | 100.0000 |

Totals : 4.68628e4 2181.35010

```
=====
*** End of Report ***
```

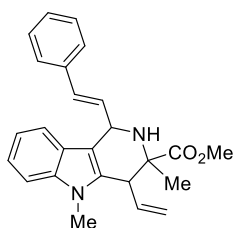

(1R\*,3S\*,4R\*)-3s

Data File E:\DATA\XS...3-53 Cinnamyl 1st 2018-07-02 14-49-15\XSM 20180702 03-53 Cinnamyl.D  
Sample Name: 03-53 Cinn 1st rac

```
=====
Acq. Operator   : SYSTEM                      Seq. Line :    1
Acq. Instrument : 1260                      Location  :   76
Injection Date  : 7/2/2018 2:50:17 PM         Inj       :    1
                                           Inj Volume: 5.000 µl
Acq. Method     : E:\DATA\XSM-In33\In33 180702 03-53 Cinnamyl 1st 2018-07-02 14-49-15\In33
                  Cinn AS-98-1mL-254nm-noD-10min.M
Last changed    : 7/2/2018 2:49:15 PM by SYSTEM
Analysis Method : E:\DATA\XSM-In33\In33 180702 03-53 Cinnamyl 1st 2018-07-02 14-49-15\In33
                  Cinn AS-98-1mL-254nm-noD-10min.M (Sequence Method)
Last changed    : 10/7/2018 8:25:08 PM by SYSTEM
                  (modified after loading)
=====
```

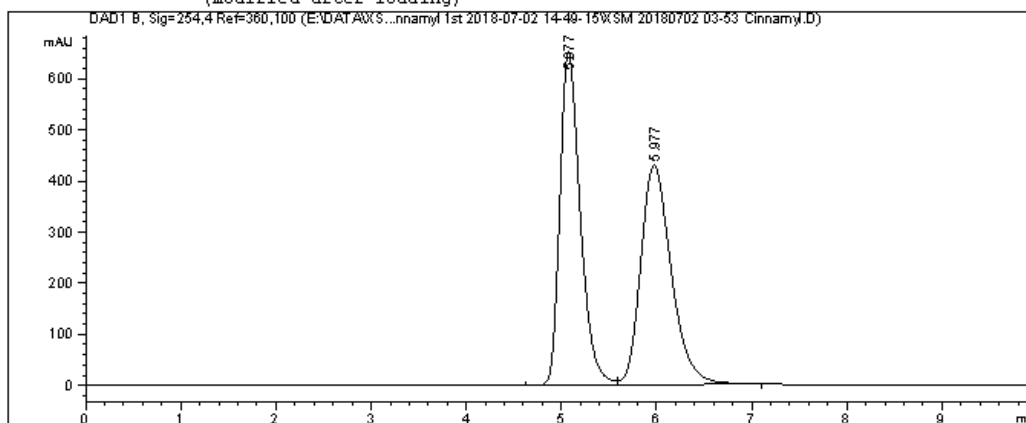

# Area Percent Report

```
Sorted By      : Signal
Multiplier     : 1.0000
Dilution       : 1.0000
Do not use Multiplier & Dilution Factor with ISTDs
```

Signal 1: DAD1 B, Sig=254,4 Ref=360,100

| Peak # | RetTime [min] | Type | Width [min] | Area [mAU*s] | Height [mAU] | Area %  |
|--------|---------------|------|-------------|--------------|--------------|---------|
| 1      | 5.077         | BV   | 0.2271      | 9676.55859   | 652.09113    | 50.2501 |
| 2      | 5.977         | VB   | 0.3423      | 9580.22559   | 429.46201    | 49.7499 |

Totals : 1.92568e4 1081.55313

\*\*\* End of Report \*\*\*

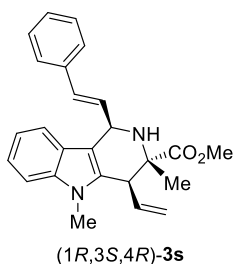

Data File E:\DATA\XS...-53 Cinnamyl 1st 2018-07-02 14-49-15\XSM 20180702 03-53 Cinnamyl1.D  
 Sample Name: 03-41 Cinn R+L opt

```
=====
Acq. Operator   : SYSTEM                      Seq. Line :    2
Acq. Instrument : 1260                      Location  :   88
Injection Date  : 7/2/2018 3:01:14 PM        Inj       :    1
                                           Inj Volume: 5.000 µl

Acq. Method     : E:\DATA\XSM-In33\In33 180702 03-53 Cinnamyl 1st 2018-07-02 14-49-15\In33
                  Cinn AS-98-1mL-254nm-noD-10min.M
Last changed    : 7/2/2018 2:49:15 PM by SYSTEM
Analysis Method : E:\DATA\XSM-In33\In33 180702 03-53 Cinnamyl 1st 2018-07-02 14-49-15\In33
                  Cinn AS-98-1mL-254nm-noD-10min.M (Sequence Method)
Last changed    : 10/7/2018 8:25:08 PM by SYSTEM
                  (modified after loading)
Additional Info : Peak(s) manually integrated
```

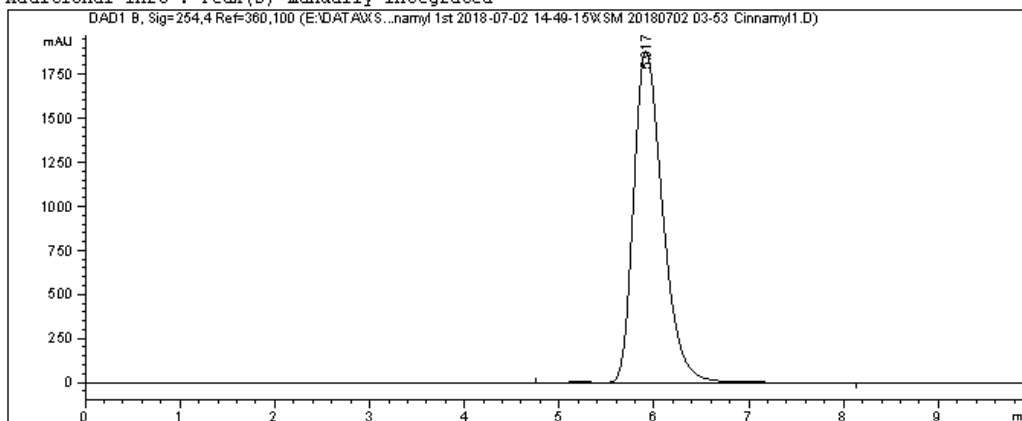

# Area Percent Report

```
Sorted By      : Signal
Multiplier     : 1.0000
Dilution       : 1.0000
Do not use Multiplier & Dilution Factor with ISTDs
```

Signal 1: DAD1 B, Sig=254,4 Ref=360,100

| Peak # | RetTime [min] | Type | Width [min] | Area [mAU*s] | Height [mAU] | Area %   |
|--------|---------------|------|-------------|--------------|--------------|----------|
| 1      | 5.917         | VB R | 0.3290      | 4.03041e4    | 1883.49219   | 100.0000 |

Totals : 4.03041e4 1883.49219

\*\*\* End of Report \*\*\*

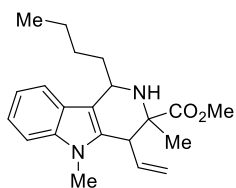

(1*R*\*,3*S*\*,4*R*\*)-3t

Data File E:\DATA\XS...80702 03-51 n-Bu 1st 2018-07-02 17-15-03\XSM 20180702 03-53 n-Bu1.D  
Sample Name: 03-51 n-Bu 1st rac

```
=====
Acq. Operator   : SYSTEM                      Seq. Line :    2
Acq. Instrument : 1260                      Location  :   79
Injection Date  : 7/2/2018 5:37:07 PM        Inj       :    1
                                           Inj Volume: 15.000 µl

Acq. Method     : E:\DATA\XSM-In33\In33 180702 03-51 n-Bu 1st 2018-07-02 17-15-03\In33 n-Bu
                  ID-98-0.5-20min-noD-15uL.M
Last changed    : 7/2/2018 5:15:03 PM by SYSTEM
Analysis Method : E:\DATA\XSM-In33\In33 180702 03-51 n-Bu 1st 2018-07-02 17-15-03\In33 n-Bu
                  ID-98-0.5-20min-noD-15uL.M (Sequence Method)
Last changed    : 10/8/2018 3:15:26 PM by SYSTEM
                  (modified after loading)
Additional Info : Peak(s) manually integrated
```

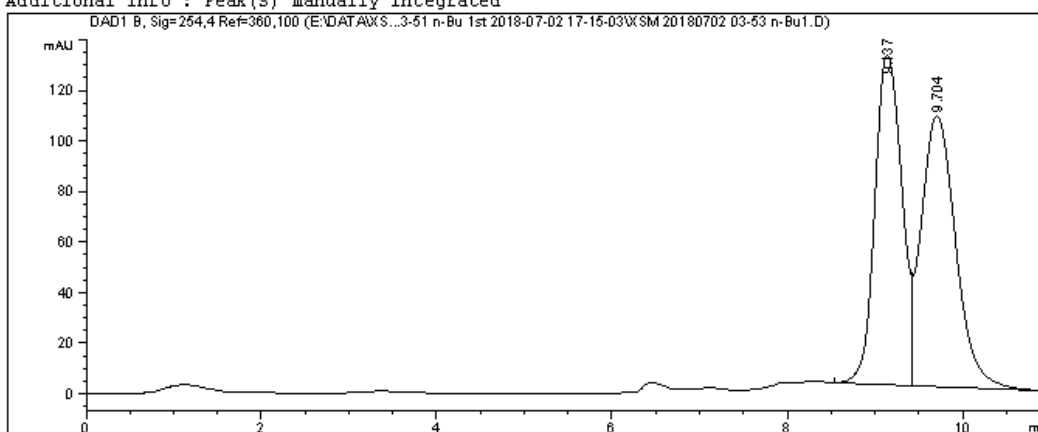

=====  
Area Percent Report  
=====

Sorted By : Signal  
Multiplier : 1.0000  
Dilution : 1.0000  
Do not use Multiplier & Dilution Factor with ISTDs

Signal 1: DAD1 B, Sig=254,4 Ref=360,100

| Peak # | RetTime [min] | Type | Width [min] | Area [mAU*s] | Height [mAU] | Area %  |
|--------|---------------|------|-------------|--------------|--------------|---------|
| 1      | 9.137         | BV   | 0.3384      | 2797.18579   | 130.33398    | 48.9638 |
| 2      | 9.704         | VB   | 0.4217      | 2915.58276   | 107.08229    | 51.0362 |

Totals : 5712.76855 237.41628

=====  
\*\*\* End of Report \*\*\*

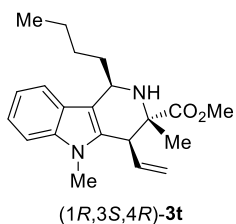

Data File E:\DATA\XS...180702 03-51 n-Bu 1st 2018-07-02 17-15-03\XSM 20180702 03-53 n-Bu.D  
Sample Name: 03-51 n-Bu R+L opt

```

=====
Acq. Operator   : SYSTEM                      Seq. Line :    1
Acq. Instrument : 1260                      Location  :   90
Injection Date  : 7/2/2018 5:16:06 PM        Inj       :    1
                                           Inj Volume: 15.000 µl
Acq. Method     : E:\DATA\XSM-In33\In33 180702 03-51 n-Bu 1st 2018-07-02 17-15-03\In33 n-Bu
                  ID-98-0.5-20min-noD-15uL.M
Last changed    : 7/2/2018 5:15:03 PM by SYSTEM
Analysis Method : E:\DATA\XSM-In33\In33 180702 03-51 n-Bu 1st 2018-07-02 17-15-03\In33 n-Bu
                  ID-98-0.5-20min-noD-15uL.M (Sequence Method)
Last changed    : 10/8/2018 3:15:26 PM by SYSTEM
                  (modified after loading)
Additional Info : Peak(s) manually integrated

```

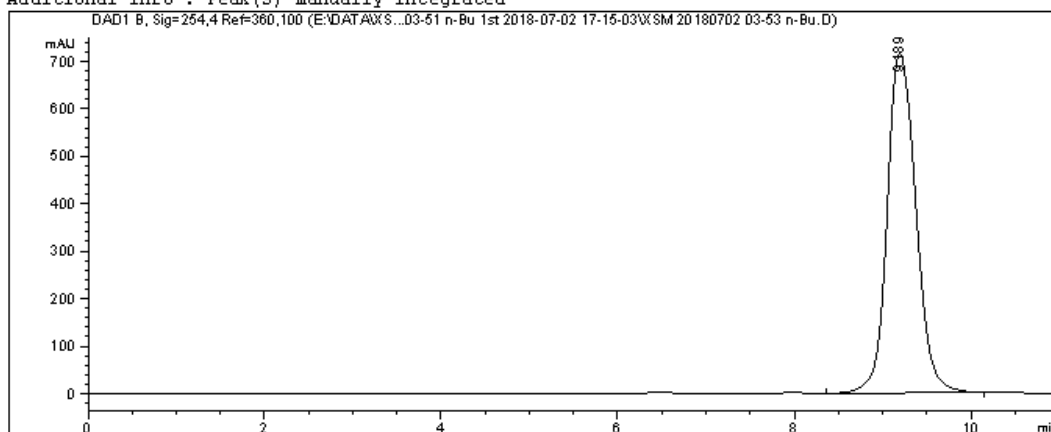

=====  
Area Percent Report  
=====

Sorted By : Signal  
Multiplier : 1.0000  
Dilution : 1.0000  
Do not use Multiplier & Dilution Factor with ISTDs

Signal 1: DAD1 B, Sig=254,4 Ref=360,100

| Peak # | RetTime [min] | Type | Width [min] | Area [mAU*s] | Height [mAU] | Area %   |
|--------|---------------|------|-------------|--------------|--------------|----------|
| 1      | 9.189         | BB   | 0.3608      | 1.62232e4    | 714.69580    | 100.0000 |

Totals : 1.62232e4 714.69580

=====  
\*\*\* End of Report \*\*\*

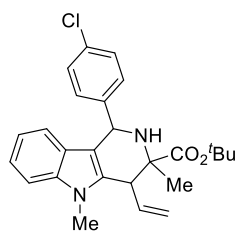

(1R\*,3S\*,4R\*)-3u

Data File E:\DATA\XSM\In33 180912 XSM 4-Cl-tBu 1st 2018-09-12 12-44-16\XSM 201809121.D  
Sample Name: In33 03-95 4-Cl-tBu 1st rac

```
=====
Acq. Operator   : SYSTEM                      Seq. Line :    2
Acq. Instrument : 1260                      Location  :   67
Injection Date  : 9/12/2018 1:07:22 PM        Inj       :    1
                                           Inj Volume: 5.000 µl
Acq. Method     : E:\DATA\XSM\In33 180912 XSM 4-Cl-tBu 1st 2018-09-12 12-44-16\In33 1st OD-98
                  -0.5mL-238nm 4-Cl-tBu.M
Last changed    : 9/12/2018 12:44:16 PM by SYSTEM
Analysis Method : E:\DATA\XSM\In33 180912 XSM 4-Cl-tBu 1st 2018-09-12 12-44-16\In33 1st OD-98
                  -0.5mL-238nm 4-Cl-tBu.M (Sequence Method)
Last changed    : 1/2/2019 5:20:27 PM by SYSTEM
                  (modified after loading)
Additional Info  : Peak(s) manually integrated
=====
```

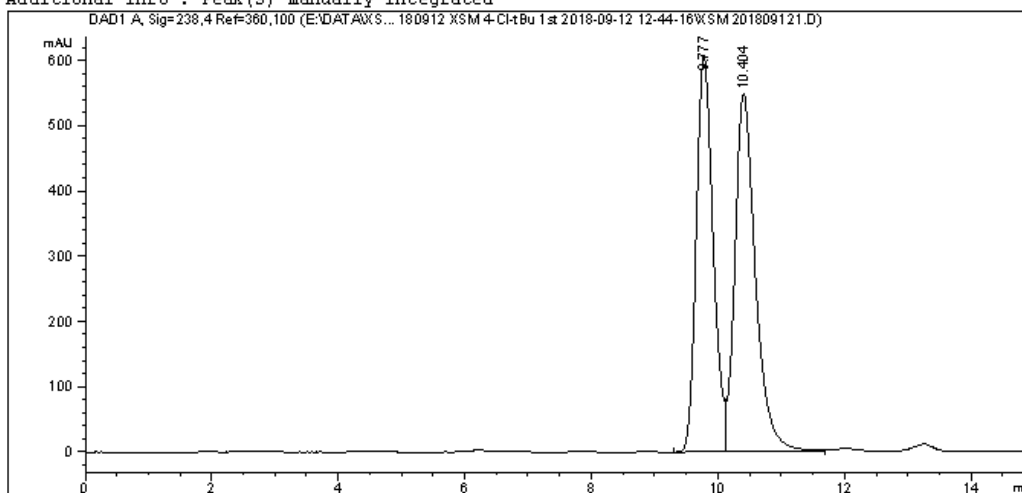

=====  
Area Percent Report  
=====

```
Sorted By      : Signal
Multiplier     : 1.0000
Dilution       : 1.0000
Do not use Multiplier & Dilution Factor with ISTDs
```

Signal 1: DAD1 A, Sig=238,4 Ref=360,100

| Peak # | RetTime [min] | Type | Width [min] | Area [mAU*s] | Height [mAU] | Area %  |
|--------|---------------|------|-------------|--------------|--------------|---------|
| 1      | 9.777         | BV   | 0.2857      | 1.12280e4    | 607.32733    | 47.7466 |
| 2      | 10.404        | VB   | 0.3373      | 1.22877e4    | 548.55389    | 52.2534 |

Totals : 2.35157e4 1155.88123

=====  
\*\*\* End of Report \*\*\*

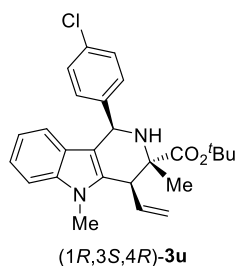

Data File E:\DATA\XSM\In33 180912 XSM 4-Cl-tBu 2018-09-12 16-16-18\XSM 20180908.D  
Sample Name: In33 03-93 4-Cl-tBu R+L opt

```
=====
Acq. Operator   : SYSTEM                      Seq. Line :    1
Acq. Instrument : 1260                      Location  :   68
Injection Date  : 9/12/2018 4:17:56 PM      Inj       :    1
                                           Inj Volume: 5.000 µl

Acq. Method     : E:\DATA\XSM\In33 180912 XSM 4-Cl-tBu 2018-09-12 16-16-18\In33 1st OD-99-0.
                                           5mL-238nm 4-Cl-tBu.M
Last changed    : 9/12/2018 4:16:19 PM by SYSTEM
Analysis Method : E:\DATA\XSM\In33 180912 XSM 4-Cl-tBu 2018-09-12 16-16-18\In33 1st OD-99-0.
                                           5mL-238nm 4-Cl-tBu.M (Sequence Method)
Last changed    : 1/2/2019 5:21:06 PM by SYSTEM
                                           (modified after loading)
Additional Info  : Peak(s) manually integrated
=====
```

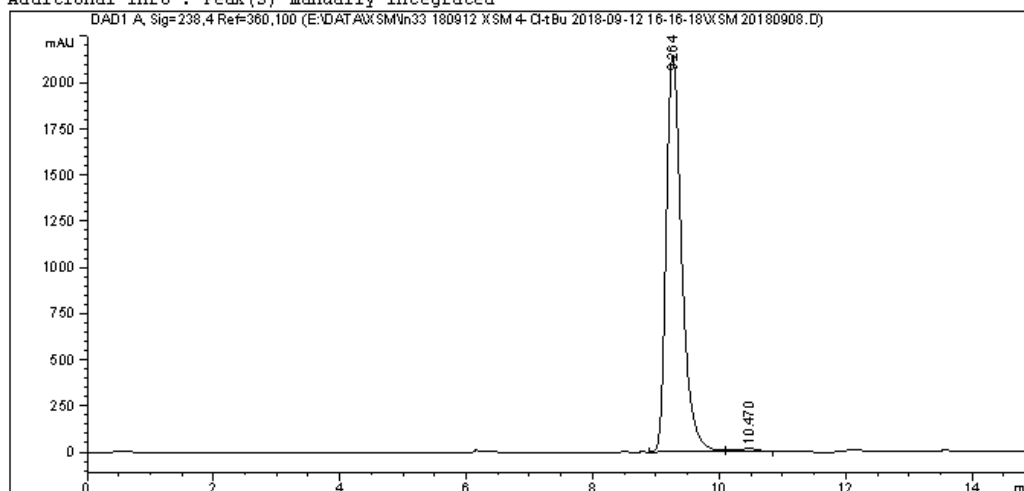

# Area Percent Report

```
=====
Sorted By      :      Signal
Multiplier     :      1.0000
Dilution       :      1.0000
Do not use Multiplier & Dilution Factor with ISTDs
=====
```

Signal 1: DAD1 A, Sig=238,4 Ref=360,100

| Peak # | RetTime [min] | Type | Width [min] | Area [mAU*s] | Height [mAU] | Area %  |
|--------|---------------|------|-------------|--------------|--------------|---------|
| 1      | 9.264         | BB   | 0.2585      | 3.62836e4    | 2143.71753   | 99.3170 |
| 2      | 10.470        | BB   | 0.2539      | 249.53914    | 14.71065     | 0.6830  |

Totals : 3.65331e4 2158.42818

\*\*\* End of Report \*\*\*

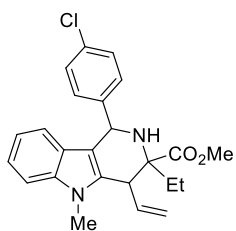

(1R\*,3S\*,4R\*)-3v

Data File E:\DATA\XSM-In33\In33 180831 03-79 a-Et1st 2018-08-31 15-06-43\XSM 20180831-21.D  
Sample Name: In33 03-92 a-Et 1st rac

```
=====
Acq. Operator   : SYSTEM                      Seq. Line :    2
Acq. Instrument : 1260                      Location  :   63
Injection Date  : 8/31/2018 3:23:34 PM        Inj       :    1
                                           Inj Volume: 5.000 µl
Acq. Method     : E:\DATA\XSM-In33\In33 180831 03-79 a-Et1st 2018-08-31 15-06-43\In33 1st AS-
                                           98-1mL-236nm-noD-15min a-Et.M
Last changed    : 8/31/2018 3:06:43 PM by SYSTEM
Analysis Method : E:\DATA\XSM-In33\In33 180831 03-79 a-Et1st 2018-08-31 15-06-43\In33 1st AS-
                                           98-1mL-236nm-noD-15min a-Et.M (Sequence Method)
Last changed    : 10/7/2018 9:07:15 PM by SYSTEM
                                           (modified after loading)
Additional Info  : Peak(s) manually integrated
```

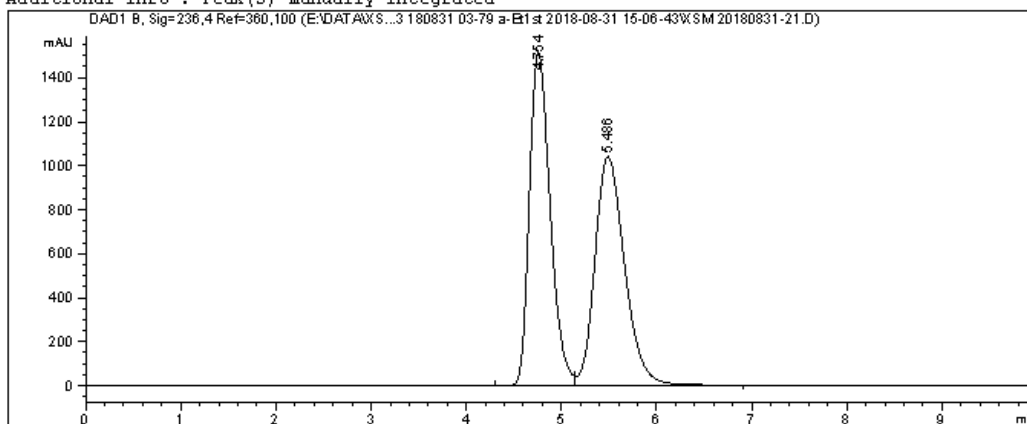

#### Area Percent Report

```
Sorted By      : Signal
Multiplier     : 1.0000
Dilution       : 1.0000
Do not use Multiplier & Dilution Factor with ISTDs
```

Signal 1: DAD1 B, Sig=236,4 Ref=360,100

| Peak # | RetTime [min] | Type | Width [min] | Area [mAU*s] | Height [mAU] | Area %  |
|--------|---------------|------|-------------|--------------|--------------|---------|
| 1      | 4.754         | BV   | 0.2342      | 2.29155e4    | 1516.93030   | 50.4745 |
| 2      | 5.486         | VB   | 0.3341      | 2.24847e4    | 1040.44324   | 49.5255 |

Totals : 4.54002e4 2557.37354

\*\*\* End of Report \*\*\*

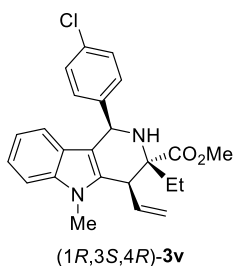

Data File E:\DATA\XSM-In33\In33 180831 03-79 a-Et1st 2018-08-31 15-06-43\XSM 20180831-2.D  
Sample Name: In33 03-79 a-Et R+L opt

```
=====
Acq. Operator   : SYSTEM                      Seq. Line :    1
Acq. Instrument : 1260                      Location  :   64
Injection Date  : 8/31/2018 3:07:37 PM        Inj       :    1
                                           Inj Volume: 5.000 µl

Acq. Method     : E:\DATA\XSM-In33\In33 180831 03-79 a-Et1st 2018-08-31 15-06-43\In33 1st AS-
                  98-1mL-236nm-noD-15min a-Et.M
Last changed    : 8/31/2018 3:06:43 PM by SYSTEM
Analysis Method : E:\DATA\XSM-In33\In33 180831 03-79 a-Et1st 2018-08-31 15-06-43\In33 1st AS-
                  98-1mL-236nm-noD-15min a-Et.M (Sequence Method)
Last changed    : 10/7/2018 9:07:15 PM by SYSTEM
                  (modified after loading)
Additional Info  : Peak(s) manually integrated
```

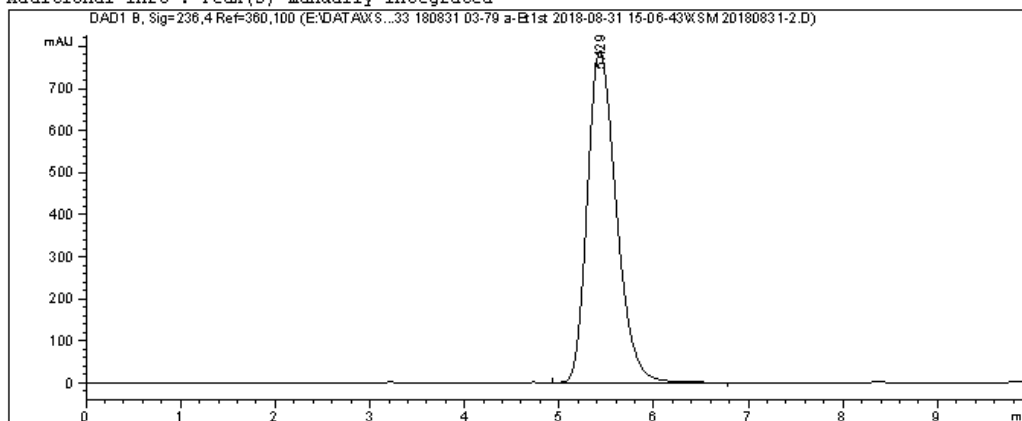

# Area Percent Report

```
Sorted By      : Signal
Multiplier     : 1.0000
Dilution       : 1.0000
Do not use Multiplier & Dilution Factor with ISTDs
```

Signal 1: DAD1 B, Sig=236,4 Ref=360,100

| Peak # | RetTime [min] | Type | Width [min] | Area [mAU*s] | Height [mAU] | Area %   |
|--------|---------------|------|-------------|--------------|--------------|----------|
| 1      | 5.429         | BB   | 0.3302      | 1.67557e4    | 787.60681    | 100.0000 |

Totals : 1.67557e4 787.60681

\*\*\* End of Report \*\*\*

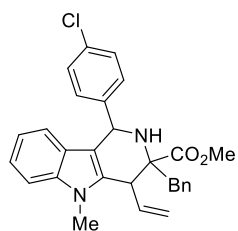

(1R\*,3S\*,4R\*)-3w

Data File E:\DATA\XSM\In33 181004 XSM 03-113 a-Bn 2018-10-04 15-22-56\XSM-1810041.D  
 Sample Name: In33 03-113 a-Bn 1st rac

```
=====
Acq. Operator   : SYSTEM                      Seq. Line :    2
Acq. Instrument : 1260                      Location  :   69
Injection Date  : 10/4/2018 3:46:03 PM        Inj       :    1
                                           Inj Volume: 5.000 µl

Acq. Method     : E:\DATA\XSM\In33 181004 XSM 03-113 a-Bn 2018-10-04 15-22-56\In33 1st rac IE
                  -98-236nm-20min a-Bn.M
Last changed    : 10/4/2018 3:22:57 PM by SYSTEM
Analysis Method : E:\DATA\XSM\In33 181004 XSM 03-113 a-Bn 2018-10-04 15-22-56\In33 1st rac IE
                  -98-236nm-20min a-Bn.M (Sequence Method)
Last changed    : 1/2/2019 5:09:23 PM by SYSTEM
                  (modified after loading)
Additional Info  : Peak(s) manually integrated
```

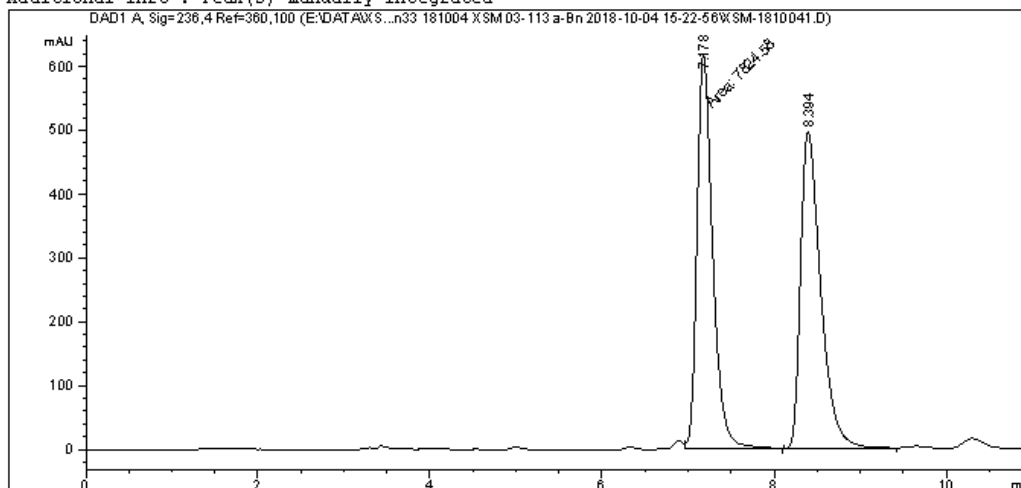

# Area Percent Report

```
Sorted By      : Signal
Multiplier     : 1.0000
Dilution       : 1.0000
Do not use Multiplier & Dilution Factor with ISTDs
```

Signal 1: DAD1 A, Sig=236,4 Ref=360,100

| Peak # | RetTime [min] | Type | Width [min] | Area [mAU*s] | Height [mAU] | Area %  |
|--------|---------------|------|-------------|--------------|--------------|---------|
| 1      | 7.178         | FM   | 0.2108      | 7824.58398   | 618.49780    | 49.2750 |
| 2      | 8.394         | BB   | 0.2465      | 8054.82324   | 495.89856    | 50.7250 |

Totals : 1.58794e4 1114.39636

\*\*\* End of Report \*\*\*

**Supplementary Figure 172.** HPLC spectrum of (1R\*,3S\*,4R\*)-3w

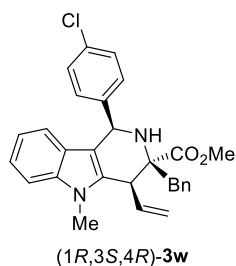

Data File E:\DATA\XSM\In33 181004 XSM 03-113 a-Bn 2018-10-04 15-22-56\XSM-181004.D  
 Sample Name: In33 03-113 a-Bn R+L opt

```

=====
Acq. Operator   : SYSTEM                      Seq. Line :    1
Acq. Instrument : 1260                      Location  :   70
Injection Date  : 10/4/2018 3:24:32 PM       Inj       :    1
                                           Inj Volume: 5.000 µl

Acq. Method     : E:\DATA\XSM\In33 181004 XSM 03-113 a-Bn 2018-10-04 15-22-56\In33 1st rac IE
                  -98-236nm-20min a-Bn.M
Last changed    : 10/4/2018 3:22:57 PM by SYSTEM
Analysis Method : E:\DATA\XSM\In33 181004 XSM 03-113 a-Bn 2018-10-04 15-22-56\In33 1st rac IE
                  -98-236nm-20min a-Bn.M (Sequence Method)
Last changed    : 1/2/2019 5:09:23 PM by SYSTEM
                  (modified after loading)
  
```

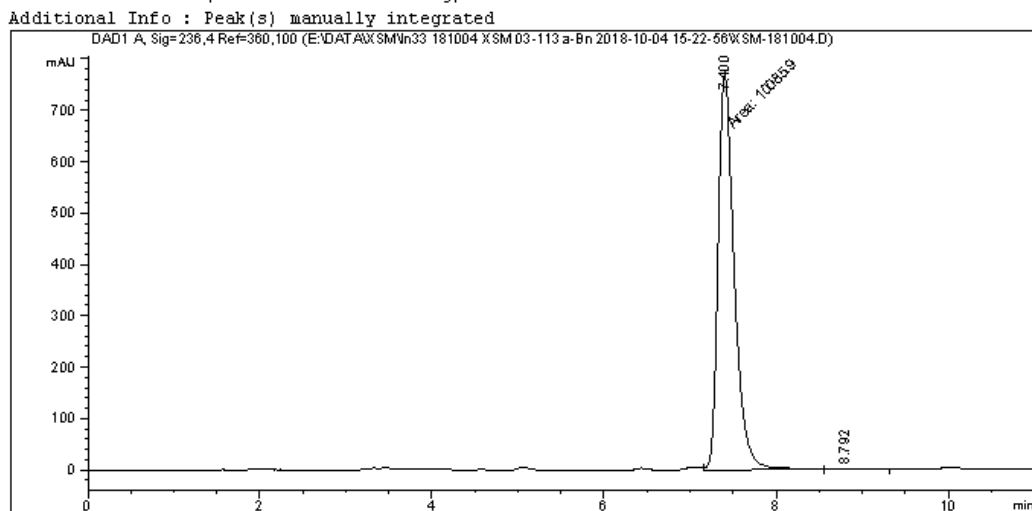

#### Area Percent Report

```

=====
Sorted By      : Signal
Multiplier     : 1.0000
Dilution       : 1.0000
Do not use Multiplier & Dilution Factor with ISTDs
  
```

Signal 1: DAD1 A, Sig=236,4 Ref=360,100

| Peak # | RetTime [min] | Type | Width [min] | Area [mAU*s] | Height [mAU] | Area %  |
|--------|---------------|------|-------------|--------------|--------------|---------|
| 1      | 7.400         | FM   | 0.2188      | 1.00859e4    | 768.44086    | 99.7616 |
| 2      | 8.792         | BB   | 0.1963      | 24.09840     | 1.48532      | 0.2384  |

Totals : 1.01100e4 769.92618

\*\*\* End of Report \*\*\*

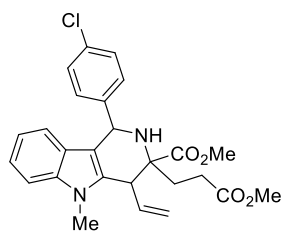

(1*R*\*,3*S*\*,4*R*\*)-3x

Data File E:\DATA\XSM\In33 181010 03-127 a-Glu IE 95 2018-10-10 14-17-35\XSM 201810101.D  
Sample Name: In33 03-127 a-Glu 1st rac

```
=====
Acq. Operator   : SYSTEM                      Seq. Line :    2
Acq. Instrument : 1260                      Location  :   69
Injection Date  : 10/10/2018 2:50:46 PM      Inj       :    1
                                           Inj Volume: 5.000 µl

Acq. Method     : E:\DATA\XSM\In33 181010 03-127 a-Glu IE 95 2018-10-10 14-17-35\In33 1st rac
                                           IE-95-40min-DAD a-Glu.M
Last changed    : 10/10/2018 2:17:35 PM by SYSTEM
Analysis Method : E:\DATA\XSM\In33 181010 03-127 a-Glu IE 95 2018-10-10 14-17-35\In33 1st rac
                                           IE-95-40min-DAD a-Glu.M (Sequence Method)
Last changed    : 1/2/2019 4:58:02 PM by SYSTEM
                                           (modified after loading)
Additional Info : Peak(s) manually integrated
```

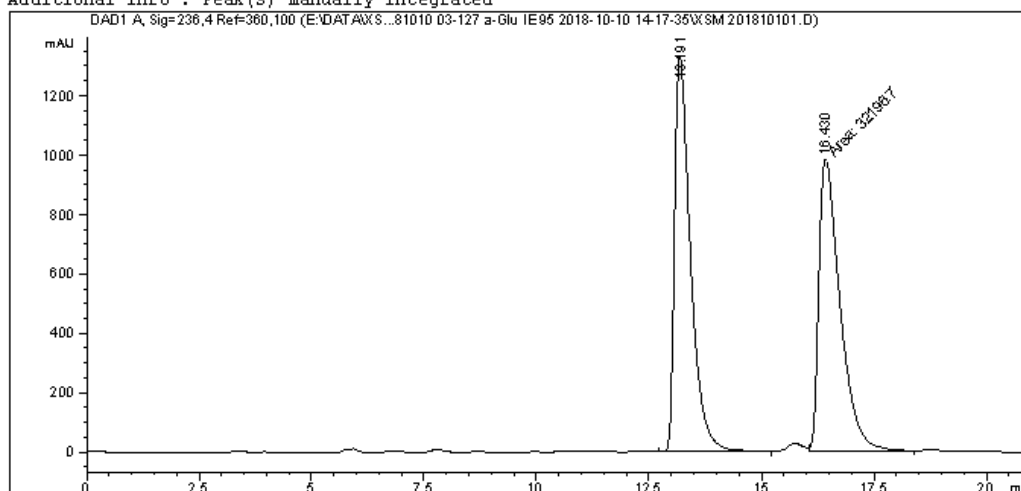

#### Area Percent Report

```
Sorted By      : Signal
Multiplier     : 1.0000
Dilution       : 1.0000
Do not use Multiplier & Dilution Factor with ISTDs
```

Signal 1: DAD1 A, Sig=236,4 Ref=360,100

| Peak # | RetTime [min] | Type | Width [min] | Area [mAU*s] | Height [mAU] | Area %  |
|--------|---------------|------|-------------|--------------|--------------|---------|
| 1      | 13.191        | BB   | 0.3648      | 3.28503e4    | 1331.48438   | 50.5024 |
| 2      | 16.430        | FM   | 0.5459      | 3.21967e4    | 983.03931    | 49.4976 |

Totals : 6.50470e4 2314.52368

\*\*\* End of Report \*\*\*

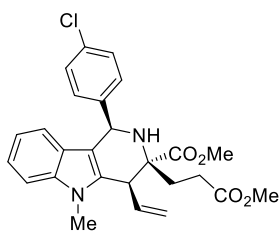

(1R,3S,4R)-3x

Data File E:\DATA\XSM\In33 181010 03-127 a-Glu IE 95 2018-10-10 14-17-35\XSM 20181010.D  
Sample Name: In33 03-127 a-Glu R+L opt

```
=====
Acq. Operator   : SYSTEM                      Seq. Line :    1
Acq. Instrument : 1260                      Location  :    70
Injection Date  : 10/10/2018 2:19:13 PM      Inj       :    1
                                           Inj Volume: 5.000 µl
Acq. Method     : E:\DATA\XSM\In33 181010 03-127 a-Glu IE 95 2018-10-10 14-17-35\In33 1st rac
                                           IE-95-40min-DAD a-Glu.M
Last changed    : 10/10/2018 2:17:35 PM by SYSTEM
Analysis Method : E:\DATA\XSM\In33 181010 03-127 a-Glu IE 95 2018-10-10 14-17-35\In33 1st rac
                                           IE-95-40min-DAD a-Glu.M (Sequence Method)
Last changed    : 1/2/2019 4:58:02 PM by SYSTEM
                                           (modified after loading)
Additional Info : Peak(s) manually integrated
```

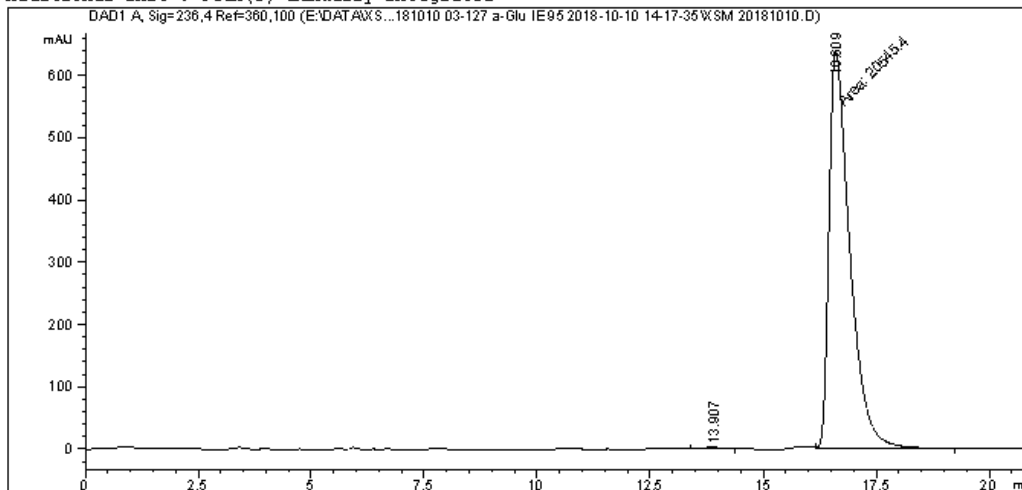

# Area Percent Report

```
Sorted By      : Signal
Multiplier     : 1.0000
Dilution       : 1.0000
Do not use Multiplier & Dilution Factor with ISTDs
```

Signal 1: DAD1 A, Sig=236,4 Ref=360,100

| Peak # | RetTime [min] | Type | Width [min] | Area [mAU*s] | Height [mAU] | Area %  |
|--------|---------------|------|-------------|--------------|--------------|---------|
| 1      | 13.907        | BB   | 0.3574      | 66.44785     | 2.18721      | 0.3224  |
| 2      | 16.609        | FM   | 0.5373      | 2.05454e4    | 637.28357    | 99.6776 |

Totals : 2.06118e4 639.47078

\*\*\* End of Report \*\*\*

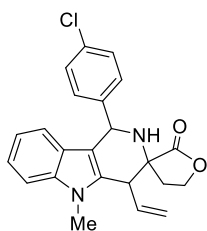

(1R\*,3S\*,4R\*)-3y

Data File E:\DATA\XS...3 180702 03-53 a-L 1st 2018-07-02 12-58-47\XSM 20180702 03-53 a-L.D  
Sample Name: 03-53 a-L 1st rac

```
=====
Acq. Operator   : SYSTEM                      Seq. Line :    1
Acq. Instrument : 1260                      Location  :   78
Injection Date  : 7/2/2018 12:59:52 PM      Inj       :    1
                                           Inj Volume: 15.000 µl
Acq. Method     : E:\DATA\XSM-In33\In33 180702 03-53 a-L 1st 2018-07-02 12-58-47\In33 a-L AS-
92-1mL-254nm-noD-15uL.M
Last changed    : 7/2/2018 1:39:28 PM by SYSTEM
(modified after loading)
Analysis Method : E:\DATA\XSM-In33\In33 180702 03-53 a-L 1st 2018-07-02 12-58-47\In33 a-L AS-
92-1mL-254nm-noD-15uL.M (Sequence Method)
Last changed    : 10/7/2018 8:18:07 PM by SYSTEM
(modified after loading)
Additional Info : Peak(s) manually integrated
```

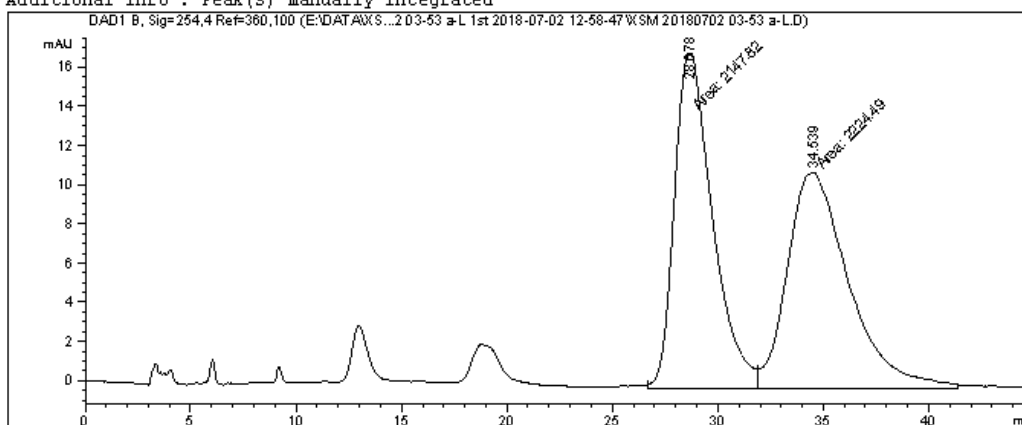

#### Area Percent Report

```
Sorted By      : Signal
Multiplier     : 1.0000
Dilution       : 1.0000
Do not use Multiplier & Dilution Factor with ISTDs
```

Signal 1: DAD1 B, Sig=254,4 Ref=360,100

| Peak # | RetTime [min] | Type | Width [min] | Area [mAU*s] | Height [mAU] | Area %  |
|--------|---------------|------|-------------|--------------|--------------|---------|
| 1      | 28.678        | MF   | 2.0939      | 2147.82495   | 17.09606     | 49.1233 |
| 2      | 34.539        | FM   | 3.3571      | 2224.49341   | 11.04360     | 50.8767 |

Totals : 4372.31836 28.13966

\*\*\* End of Report \*\*\*

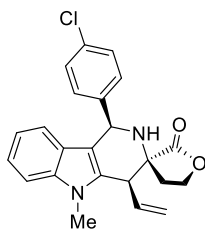

(1R,3S,4R)-3y

Data File E:\DATA\XS... 180702 03-53 a-L 1st 2018-07-02 12-58-47\XSM 20180702 03-53 a-L1.D  
Sample Name: 03-53 a-L R+L opt

```
=====
Acq. Operator   : SYSTEM                      Seq. Line :    2
Acq. Instrument : 1260                      Location  :   89
Injection Date  : 7/2/2018 1:50:55 PM         Inj       :    1
                                           Inj Volume: 15.000 µl
Acq. Method     : E:\DATA\XSM-In33\In33 180702 03-53 a-L 1st 2018-07-02 12-58-47\In33 a-L AS-
                                           92-1mL-254nm-noD-15uL.M
Last changed    : 7/2/2018 1:39:28 PM by SYSTEM
Analysis Method : E:\DATA\XSM-In33\In33 180702 03-53 a-L 1st 2018-07-02 12-58-47\In33 a-L AS-
                                           92-1mL-254nm-noD-15uL.M (Sequence Method)
Last changed    : 10/7/2018 8:18:46 PM by SYSTEM
                                           (modified after loading)
Additional Info : Peak(s) manually integrated
```

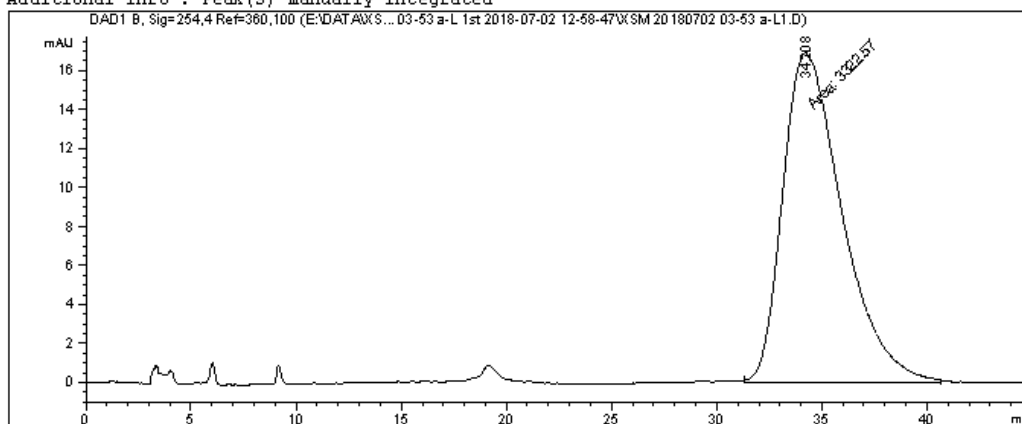

# Area Percent Report

```
Sorted By      : Signal
Multiplier     : 1.0000
Dilution       : 1.0000
Do not use Multiplier & Dilution Factor with ISTDs
```

Signal 1: DAD1 B, Sig=254,4 Ref=360,100

| Peak # | RetTime [min] | Type | Width [min] | Area [mAU*s] | Height [mAU] | Area %   |
|--------|---------------|------|-------------|--------------|--------------|----------|
| 1      | 34.208        | MM   | 3.2704      | 3322.56860   | 16.93274     | 100.0000 |

Totals : 3322.56860 16.93274

\*\*\* End of Report \*\*\*

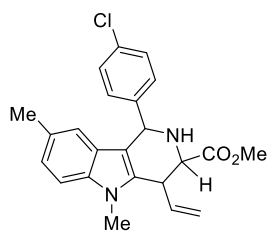

(1R\*,3S\*,4R\*)-3z

Data File E:\DATA\XS...230 04-12 2Cl-23Me-5Mein-aH 1st 2018-12-30 17-30-14\XSM 201812301.D  
Sample Name: In33 04-12 5-Me-in-aH 1st rac

```
=====
Acq. Operator   : SYSTEM                      Seq. Line :    2
Acq. Instrument : 1260                      Location  :   60
Injection Date  : 12/30/2018 6:02:10 PM      Inj       :    1
                                           Inj Volume: 5.000 µl
Acq. Method     : E:\DATA\XSM\In33 181230 04-12 2Cl-23Me-5Mein-aH 1st 2018-12-30 17-30-14
                  \In33 AD-98-226nm-30min 5-Me-in-aH.M
Last changed    : 12/30/2018 5:30:15 PM by SYSTEM
Analysis Method : E:\DATA\XSM\In33 181230 04-12 2Cl-23Me-5Mein-aH 1st 2018-12-30 17-30-14
                  \In33 AD-98-226nm-30min 5-Me-in-aH.M (Sequence Method)
Last changed    : 1/2/2019 11:03:14 AM by SYSTEM
                  (modified after loading)
Additional Info : Peak(s) manually integrated
```

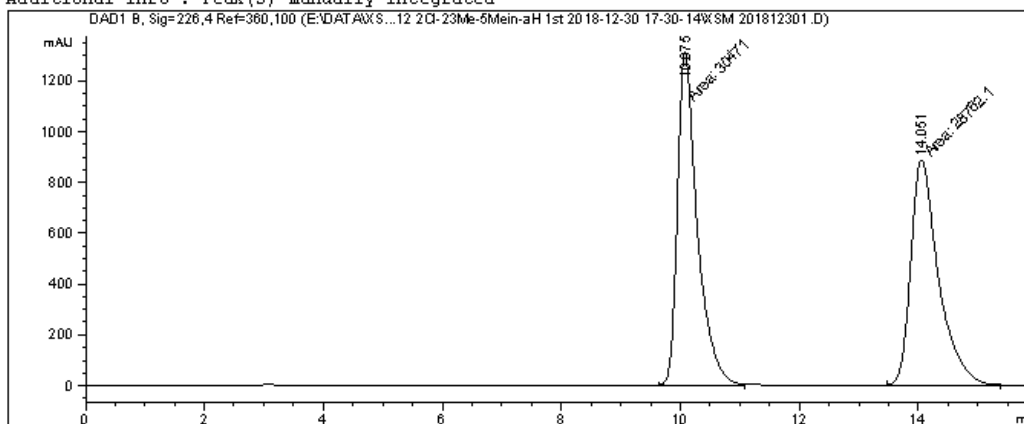

# Area Percent Report

```
Sorted By      : Signal
Multiplier     : 1.0000
Dilution       : 1.0000
Do not use Multiplier & Dilution Factor with ISTDs
```

Signal 1: DAD1 B, Sig=226,4 Ref=360,100

| Peak # | RetTime [min] | Type | Width [min] | Area [mAU*s] | Height [mAU] | Area %  |
|--------|---------------|------|-------------|--------------|--------------|---------|
| 1      | 10.075        | MF   | 0.3868      | 3.04710e4    | 1312.89771   | 51.4425 |
| 2      | 14.051        | MF   | 0.5388      | 2.87621e4    | 889.71027    | 48.5575 |

Totals : 5.92331e4 2202.60797

\*\*\* End of Report \*\*\*

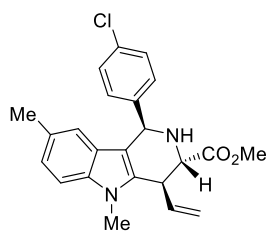

(1R,3S,4R)-3z

Data File E:\DATA\XS...230 04-12 2Cl-23Me-5Mein-aH 1st 2018-12-30 17-30-14\XSM 201812308.D  
Sample Name: In33 04-12 5-Me-in-aH R+L opt

```
=====
Acq. Operator   : SYSTEM                      Seq. Line :    9
Acq. Instrument : 1260                      Location  :   59
Injection Date  : 12/30/2018 9:38:51 PM      Inj       :    1
                                           Inj Volume: 5.000 µl
Acq. Method     : E:\DATA\XSM\In33 181230 04-12 2Cl-23Me-5Mein-aH 1st 2018-12-30 17-30-14
                  \In33 AD-98-226nm-30min 5-Me-in-aH.M
Last changed    : 12/30/2018 5:30:15 PM by SYSTEM
Analysis Method : E:\DATA\XSM\In33 181230 04-12 2Cl-23Me-5Mein-aH 1st 2018-12-30 17-30-14
                  \In33 AD-98-226nm-30min 5-Me-in-aH.M (Sequence Method)
Last changed    : 1/2/2019 11:03:14 AM by SYSTEM
                  (modified after loading)
Additional Info : Peak(s) manually integrated
```

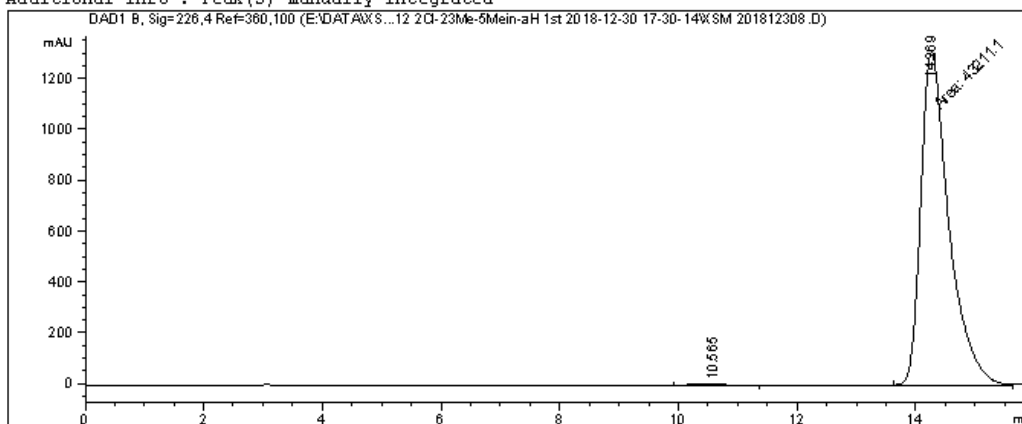

# Area Percent Report

```
Sorted By      : Signal
Multiplier     : 1.0000
Dilution       : 1.0000
Do not use Multiplier & Dilution Factor with ISTDs
```

Signal 1: DAD1 B, Sig=226,4 Ref=360,100

| Peak # | RetTime [min] | Type | Width [min] | Area [mAU*s] | Height [mAU] | Area %  |
|--------|---------------|------|-------------|--------------|--------------|---------|
| 1      | 10.565        | BB   | 0.4555      | 190.93904    | 5.66090      | 0.4399  |
| 2      | 14.269        | MF   | 0.5491      | 4.32111e4    | 1311.52319   | 99.5601 |

Totals : 4.34021e4 1317.18410

\*\*\* End of Report \*\*\*

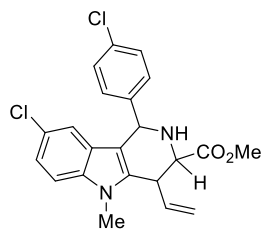

(1*R*\*,3*S*\*,4*R*\*)-3A

Data File E:\DATA\XSM\In33 181208 04-10 5-Cl-in-aH 4p div 2018-12-08 17-42-51\XSM 181207.D  
Sample Name: In33 04-10 5-Cl-in-aH rac 4p div

```
=====
Acq. Operator   : SYSTEM                      Seq. Line :    1
Acq. Instrument : 1260                      Location  :   66
Injection Date  : 12/8/2018 5:44:20 PM       Inj       :    1
                                           Inj Volume: 5.000 µl
Acq. Method     : E:\DATA\XSM\In33 181208 04-10 5-Cl-in-aH 4p div 2018-12-08 17-42-51\In33 AD
                  -98-40min-238nm 5Cl-in-aH 4p div.M
Last changed    : 12/8/2018 5:42:51 PM by SYSTEM
Analysis Method : E:\DATA\XSM\In33 181208 04-10 5-Cl-in-aH 4p div 2018-12-08 17-42-51\In33 AD
                  -98-40min-238nm 5Cl-in-aH 4p div.M (Sequence Method)
Last changed    : 1/2/2019 11:55:33 AM by SYSTEM
                  (modified after loading)
Additional Info  : Peak(s) manually integrated
```

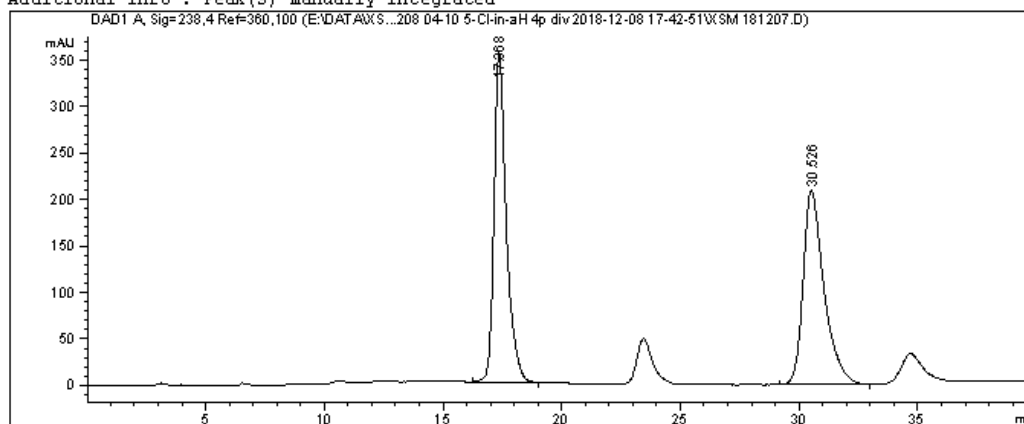

# Area Percent Report

```
Sorted By      : Signal
Multiplier     : 1.0000
Dilution       : 1.0000
Do not use Multiplier & Dilution Factor with ISTDs
```

Signal 1: DAD1 A, Sig=238,4 Ref=360,100

| Peak # | RetTime [min] | Type | Width [min] | Area [mAU*s] | Height [mAU] | Area %  |
|--------|---------------|------|-------------|--------------|--------------|---------|
| 1      | 17.368        | BB   | 0.5281      | 1.27770e4    | 354.80240    | 49.9110 |
| 2      | 30.526        | BB   | 0.8524      | 1.28226e4    | 209.10309    | 50.0890 |

Totals : 2.55996e4 563.90549

\*\*\* End of Report \*\*\*

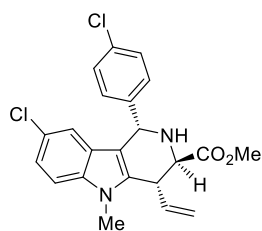

(1S,3R,4S)-3A

Data File E:\DATA\XSM...33 181208 04-10 5-Cl-in-aH 4p div 2018-12-08 17-42-51\XSM 1812071.D  
Sample Name: In33 04-10 5-Cl-in-aH S+D opt

```
=====
Acq. Operator   : SYSTEM                      Seq. Line :    2
Acq. Instrument : 1260                      Location  :   67
Injection Date  : 12/8/2018 6:25:48 PM        Inj       :    1
                                           Inj Volume: 5.000 µl
Acq. Method     : E:\DATA\XSM\In33 181208 04-10 5-Cl-in-aH 4p div 2018-12-08 17-42-51\In33 AD
                  -98-40min-238nm 5Cl-in-aH 4p div.M
Last changed    : 12/8/2018 5:42:51 PM by SYSTEM
Analysis Method : E:\DATA\XSM\In33 181208 04-10 5-Cl-in-aH 4p div 2018-12-08 17-42-51\In33 AD
                  -98-40min-238nm 5Cl-in-aH 4p div.M (Sequence Method)
Last changed    : 1/2/2019 11:55:33 AM by SYSTEM
                  (modified after loading)
Additional Info : Peak(s) manually integrated
```

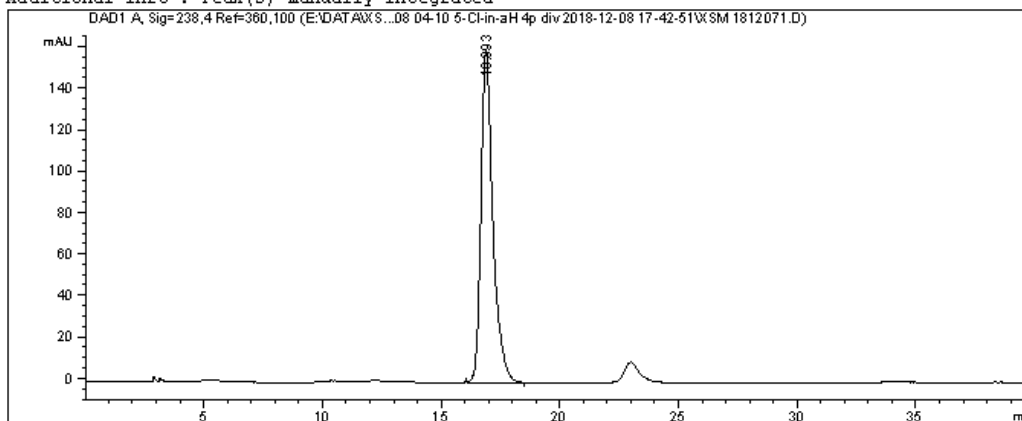

# Area Percent Report

```
Sorted By      : Signal
Multiplier     : 1.0000
Dilution       : 1.0000
Do not use Multiplier & Dilution Factor with ISTDs
```

Signal 1: DAD1 A, Sig=238,4 Ref=360,100

| Peak # | RetTime [min] | Type | Width [min] | Area [mAU*s] | Height [mAU] | Area %   |
|--------|---------------|------|-------------|--------------|--------------|----------|
| 1      | 16.893        | BB   | 0.5104      | 5577.32080   | 159.73375    | 100.0000 |

Totals : 5577.32080 159.73375

\*\*\* End of Report \*\*\*

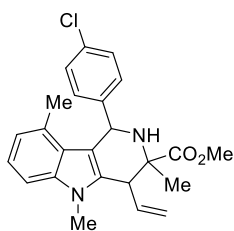

(1*R*\*,3*S*\*,4*R*\*)-3B

Data File E:\DATA\XS...17 03-68&77 4-Me-in 1st 2018-08-17 13-36-11\XSM 20180817 4-Me-in1.D  
Sample Name: In33 03-77 4-Me-in 1st rac

```
=====
Acq. Operator   : SYSTEM                      Seq. Line :    2
Acq. Instrument : 1260                      Location  :   62
Injection Date  : 8/17/2018 1:59:05 PM        Inj       :    1
                                           Inj Volume: 1.000 µl
Acq. Method     : E:\DATA\XSM\In33 180817 03-68&77 4-Me-in 1st 2018-08-17 13-36-11\In33 As-98
                  -1mL-238nm-20min-noD 567-Me-in.M
Last changed    : 8/17/2018 1:36:12 PM by SYSTEM
Analysis Method : E:\DATA\XSM\In33 180817 03-68&77 4-Me-in 1st 2018-08-17 13-36-11\In33 As-98
                  -1mL-238nm-20min-noD 567-Me-in.M (Sequence Method)
Last changed    : 10/8/2018 3:28:36 PM by SYSTEM
                  (modified after loading)
Additional Info  : Peak(s) manually integrated
```

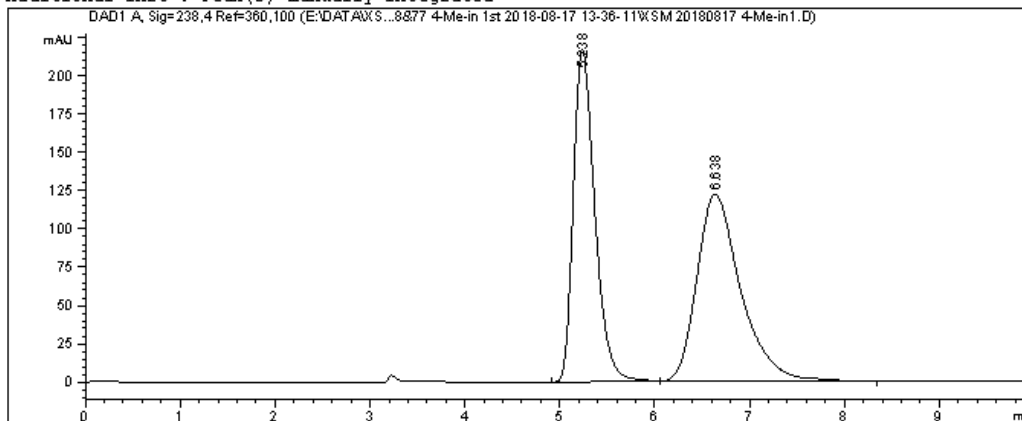

# Area Percent Report

```
Sorted By      : Signal
Multiplier     : 1.0000
Dilution       : 1.0000
Do not use Multiplier & Dilution Factor with ISTDs
```

Signal 1: DAD1 A, Sig=238,4 Ref=360,100

| Peak # | RetTime [min] | Type | Width [min] | Area [mAU*s] | Height [mAU] | Area %  |
|--------|---------------|------|-------------|--------------|--------------|---------|
| 1      | 5.238         | BB   | 0.2391      | 3402.60376   | 216.83220    | 46.5855 |
| 2      | 6.638         | BB   | 0.4757      | 3901.40088   | 121.79879    | 53.4145 |

Totals : 7304.00464 338.63099

\*\*\* End of Report \*\*\*

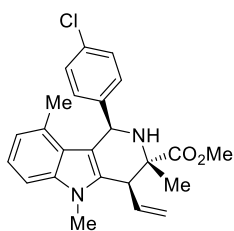

(1R,3S,4R)-3B

Data File E:\DATA\XSM...817 03-68&77 4-Me-in 1st 2018-08-17 13-36-11\XSM 20180817 4-Me-in.D  
Sample Name: In33 03-68 4-Me-in R+L opt

```
=====
Acq. Operator   : SYSTEM                      Seq. Line :    1
Acq. Instrument : 1260                      Location  :   63
Injection Date  : 8/17/2018 1:37:35 PM        Inj       :    1
                                           Inj Volume: 1.000 µl
Acq. Method     : E:\DATA\XSM\In33 180817 03-68&77 4-Me-in 1st 2018-08-17 13-36-11\In33 As-98
                  -1mL-238nm-20min-noD 567-Me-in.M
Last changed    : 8/17/2018 1:36:12 PM by SYSTEM
Analysis Method : E:\DATA\XSM\In33 180817 03-68&77 4-Me-in 1st 2018-08-17 13-36-11\In33 As-98
                  -1mL-238nm-20min-noD 567-Me-in.M (Sequence Method)
Last changed    : 10/8/2018 3:28:36 PM by SYSTEM
                  (modified after loading)
Additional Info : Peak(s) manually integrated
```

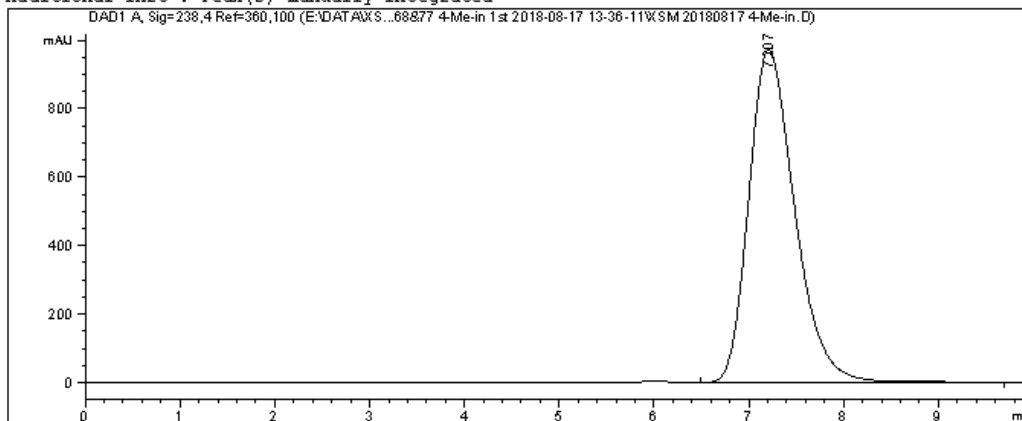

# Area Percent Report

```
Sorted By      : Signal
Multiplier     : 1.0000
Dilution       : 1.0000
Do not use Multiplier & Dilution Factor with ISTDs
```

Signal 1: DAD1 A, Sig=238,4 Ref=360,100

| Peak # | RetTime [min] | Type | Width [min] | Area [mAU*s] | Height [mAU] | Area %   |
|--------|---------------|------|-------------|--------------|--------------|----------|
| 1      | 7.207         | BB   | 0.5156      | 3.28032e4    | 972.28595    | 100.0000 |

Totals : 3.28032e4 972.28595

\*\*\* End of Report \*\*\*

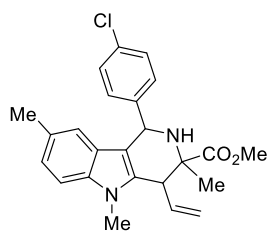

(1*R*\*,3*S*\*,4*R*\*)-3C

Data File E:\DATA\XS... 03-75 567-Me-in 1st 2018-08-15 12-49-10\In33 20180815 567-Me-in1.D  
Sample Name: In33 03-73 5-Me-in 1st rac

```
=====
Acq. Operator   : SYSTEM                      Seq. Line :    2
Acq. Instrument : 1260                      Location  :   62
Injection Date  : 8/15/2018 1:12:07 PM        Inj       :    1
                                           Inj Volume: 1.000 µl

Acq. Method     : E:\DATA\XSM-In33\In33 180815 03-75 567-Me-in 1st 2018-08-15 12-49-10\In33
                  As-98-1mL-238nm-20min-noD 567-Me-in.M
Last changed    : 8/15/2018 12:49:10 PM by SYSTEM
Analysis Method : E:\DATA\XSM-In33\In33 180815 03-75 567-Me-in 1st 2018-08-15 12-49-10\In33
                  As-98-1mL-238nm-20min-noD 567-Me-in.M (Sequence Method)
Last changed    : 10/7/2018 8:33:41 PM by SYSTEM
                  (modified after loading)

Additional Info : Peak(s) manually integrated
```

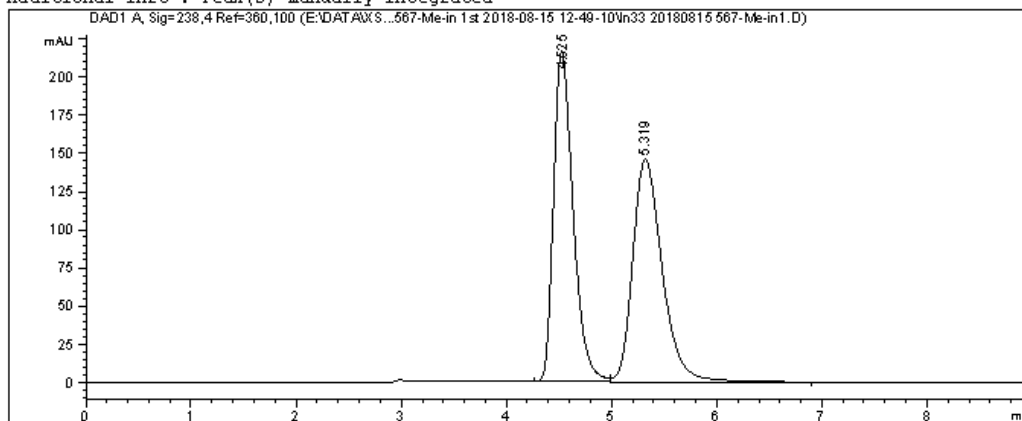

=====  
Area Percent Report  
=====

Sorted By : Signal  
Multiplier : 1.0000  
Dilution : 1.0000  
Do not use Multiplier & Dilution Factor with ISTDs

Signal 1: DAD1 A, Sig=238,4 Ref=360,100

| Peak # | RetTime [min] | Type | Width [min] | Area [mAU*s] | Height [mAU] | Area %  |
|--------|---------------|------|-------------|--------------|--------------|---------|
| 1      | 4.525         | BV   | 0.1976      | 2794.13916   | 216.39355    | 49.6816 |
| 2      | 5.319         | VB   | 0.2967      | 2829.95410   | 145.63527    | 50.3184 |

Totals : 5624.09326 362.02882

=====  
\*\*\* End of Report \*\*\*

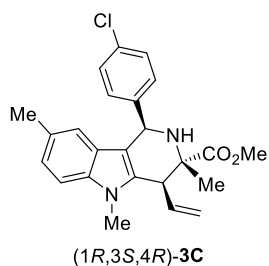

Data File E:\DATA\XS...5 03-75 567-Me-in 1st 2018-08-15 12-49-10\In33 20180815 567-Me-in.D  
Sample Name: In33 03-73 5-Me-in R+L opt

```
=====
Acq. Operator   : SYSTEM                      Seq. Line :    1
Acq. Instrument : 1260                      Location  :   66
Injection Date  : 8/15/2018 12:50:39 PM      Inj       :    1
                                           Inj Volume: 1.000 µl

Acq. Method     : E:\DATA\XSM-In33\In33 180815 03-75 567-Me-in 1st 2018-08-15 12-49-10\In33
                  As-98-1mL-238nm-20min-noD 567-Me-in.M
Last changed    : 8/15/2018 12:49:10 PM by SYSTEM
Analysis Method : E:\DATA\XSM-In33\In33 180815 03-75 567-Me-in 1st 2018-08-15 12-49-10\In33
                  As-98-1mL-238nm-20min-noD 567-Me-in.M (Sequence Method)
Last changed    : 10/7/2018 8:33:41 PM by SYSTEM
                  (modified after loading)
```

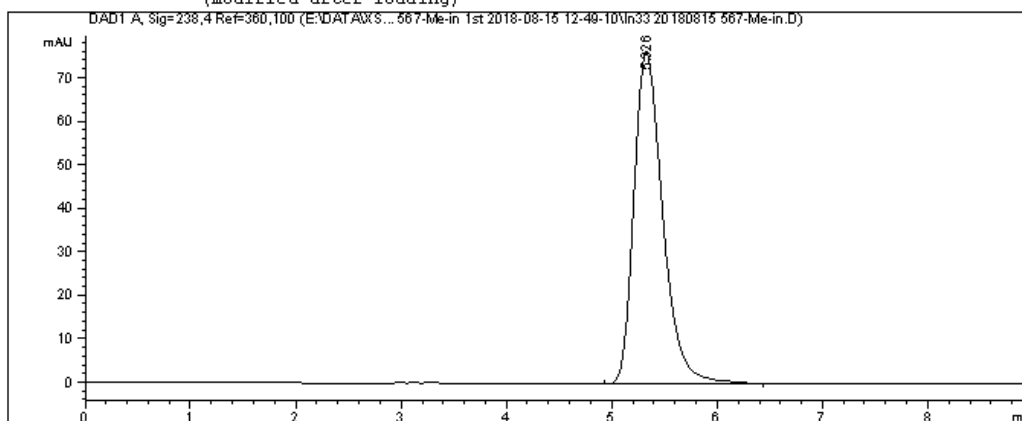

```
=====
                          Area Percent Report
=====
```

```
Sorted By      :      Signal
Multiplier     :      1.0000
Dilution       :      1.0000
Do not use Multiplier & Dilution Factor with ISTDs
```

Signal 1: DAD1 A, Sig=238,4 Ref=360,100

| Peak # | RetTime [min] | Type | Width [min] | Area [mAU*s] | Height [mAU] | Area %   |
|--------|---------------|------|-------------|--------------|--------------|----------|
| 1      | 5.326         | BB   | 0.2903      | 1447.38354   | 76.31286     | 100.0000 |

Totals :                      1447.38354    76.31286

```
=====
*** End of Report ***
```

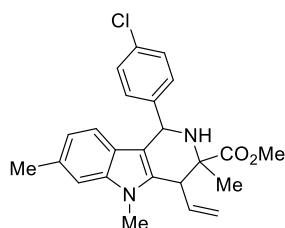

(1R\*,3S\*,4R\*)-3D

Data File E:\DATA\XS... 03-75 567-Me-in 1st 2018-08-15 12-49-10\In33 20180815 567-Me-in3.D  
Sample Name: In33 03-73 6-Me-in 1st rac

```
=====
Acq. Operator   : SYSTEM                      Seq. Line :    4
Acq. Instrument : 1260                      Location  :   63
Injection Date  : 8/15/2018 1:55:06 PM        Inj       :    1
                                           Inj Volume: 1.000 µl
Acq. Method     : E:\DATA\XSM-In33\In33 180815 03-75 567-Me-in 1st 2018-08-15 12-49-10\In33
                  As-98-1mL-238nm-20min-noD 567-Me-in.M
Last changed    : 8/15/2018 12:49:10 PM by SYSTEM
Analysis Method : E:\DATA\XSM-In33\In33 180815 03-75 567-Me-in 1st 2018-08-15 12-49-10\In33
                  As-98-1mL-238nm-20min-noD 567-Me-in.M (Sequence Method)
Last changed    : 10/7/2018 8:33:41 PM by SYSTEM
                  (modified after loading)
Additional Info  : Peak(s) manually integrated
```

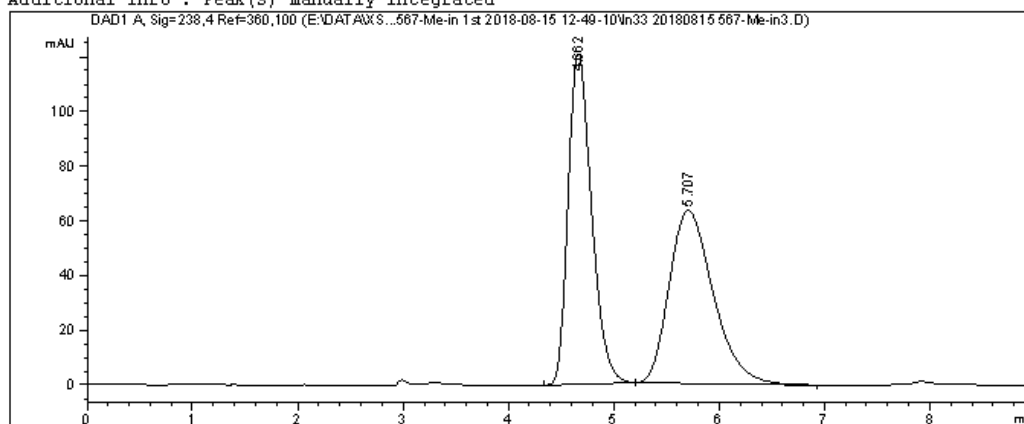

# Area Percent Report

```
Sorted By      : Signal
Multiplier     : 1.0000
Dilution       : 1.0000
Do not use Multiplier & Dilution Factor with ISTDs
```

Signal 1: DAD1 A, Sig=238,4 Ref=360,100

| Peak # | RetTime [min] | Type | Width [min] | Area [mAU*s] | Height [mAU] | Area %  |
|--------|---------------|------|-------------|--------------|--------------|---------|
| 1      | 4.662         | BB   | 0.2367      | 1867.12244   | 121.20483    | 50.3574 |
| 2      | 5.707         | BB   | 0.4417      | 1840.61865   | 63.39560     | 49.6426 |

Totals : 3707.74109 184.60043

\*\*\* End of Report \*\*\*

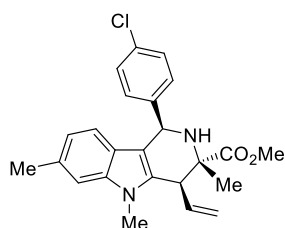

(1R,3S,4R)-3D

Data File E:\DATA\XS... 03-75 567-Me-in 1st 2018-08-15 12-49-10\In33 20180815 567-Me-in2.D  
Sample Name: In33 03-74 6-Me-in R+L opt

```
=====
Acq. Operator   : SYSTEM                      Seq. Line :    3
Acq. Instrument : 1260                      Location  :   67
Injection Date  : 8/15/2018 1:33:38 PM        Inj       :    1
                                           Inj Volume: 1.000 µl

Acq. Method     : E:\DATA\XSM-In33\In33 180815 03-75 567-Me-in 1st 2018-08-15 12-49-10\In33
                  As-98-1mL-238nm-20min-noD 567-Me-in.M
Last changed    : 8/15/2018 12:49:10 PM by SYSTEM
Analysis Method : E:\DATA\XSM-In33\In33 180815 03-75 567-Me-in 1st 2018-08-15 12-49-10\In33
                  As-98-1mL-238nm-20min-noD 567-Me-in.M (Sequence Method)
Last changed    : 10/7/2018 8:33:41 PM by SYSTEM
                  (modified after loading)
Additional Info  : Peak(s) manually integrated
```

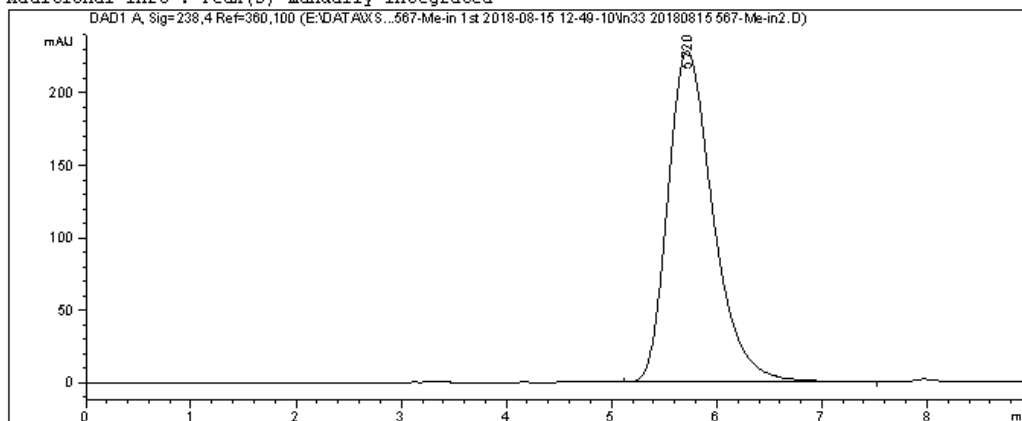

# Area Percent Report

```
Sorted By      : Signal
Multiplier     : 1.0000
Dilution       : 1.0000
Do not use Multiplier & Dilution Factor with ISTDs
```

Signal 1: DAD1 A, Sig=238,4 Ref=360,100

| Peak # | RetTime [min] | Type | Width [min] | Area [mAU*s] | Height [mAU] | Area %   |
|--------|---------------|------|-------------|--------------|--------------|----------|
| 1      | 5.720         | BB   | 0.4514      | 6790.19629   | 228.06514    | 100.0000 |

Totals : 6790.19629 228.06514

\*\*\* End of Report \*\*\*

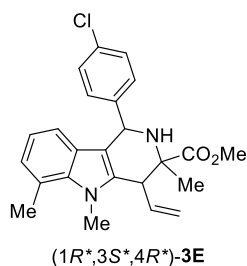

Data File E:\DATA\XS... 03-75 567-Me-in 1st 2018-08-15 12-49-10\In33 20180815 567-Me-in5.D  
Sample Name: In33 03-73 7-Me-in 1st rac

```
=====
Acq. Operator   : SYSTEM                      Seq. Line :    6
Acq. Instrument : 1260                      Location  :   64
Injection Date  : 8/15/2018 2:38:09 PM        Inj       :    1
                                           Inj Volume: 1.000 µl
Acq. Method     : E:\DATA\XSM-In33\In33 180815 03-75 567-Me-in 1st 2018-08-15 12-49-10\In33
                  As-98-1mL-238nm-20min-noD 567-Me-in.M
Last changed    : 8/15/2018 12:49:10 PM by SYSTEM
Analysis Method : E:\DATA\XSM-In33\In33 180815 03-75 567-Me-in 1st 2018-08-15 12-49-10\In33
                  As-98-1mL-238nm-20min-noD 567-Me-in.M (Sequence Method)
Last changed    : 10/7/2018 8:31:47 PM by SYSTEM
                  (modified after loading)
=====
```

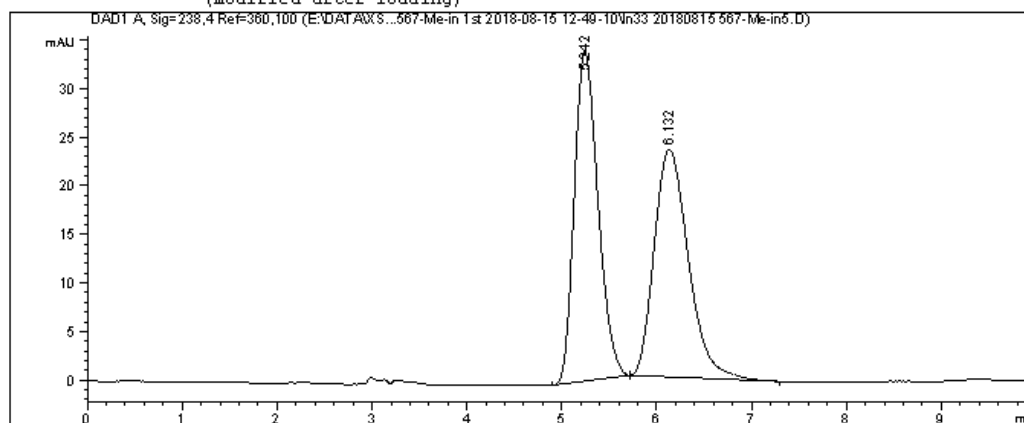

#### Area Percent Report

```
Sorted By      : Signal
Multiplier     : 1.0000
Dilution       : 1.0000
Do not use Multiplier & Dilution Factor with ISTDs
```

Signal 1: DAD1 A, Sig=238,4 Ref=360,100

| Peak # | RetTime [min] | Type | Width [min] | Area [mAU*s] | Height [mAU] | Area %  |
|--------|---------------|------|-------------|--------------|--------------|---------|
| 1      | 5.242         | BB   | 0.2635      | 587.10394    | 33.82989     | 50.0286 |
| 2      | 6.132         | BB   | 0.3811      | 586.43256    | 23.41905     | 49.9714 |

Totals : 1173.53650 57.24894

\*\*\* End of Report \*\*\*

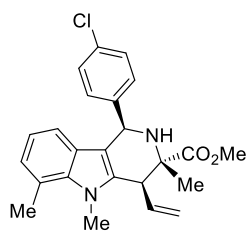

(1R,3S,4R)-3E

Data File E:\DATA\XS... 03-75 567-Me-in 1st 2018-08-15 12-49-10\In33 20180815 567-Me-in4.D  
Sample Name: In33 03-74 7-Me-in R+L opt

```
=====
Acq. Operator   : SYSTEM                      Seq. Line :    5
Acq. Instrument : 1260                      Location  :   68
Injection Date  : 8/15/2018 2:16:38 PM      Inj       :    1
                                           Inj Volume: 1.000 µl

Acq. Method     : E:\DATA\XSM-In33\In33 180815 03-75 567-Me-in 1st 2018-08-15 12-49-10\In33
                  As-98-1mL-238nm-20min-noD 567-Me-in.M
Last changed    : 8/15/2018 12:49:10 PM by SYSTEM
Analysis Method : E:\DATA\XSM-In33\In33 180815 03-75 567-Me-in 1st 2018-08-15 12-49-10\In33
                  As-98-1mL-238nm-20min-noD 567-Me-in.M (Sequence Method)
Last changed    : 10/7/2018 8:32:22 PM by SYSTEM
                  (modified after loading)

Additional Info : Peak(s) manually integrated
```

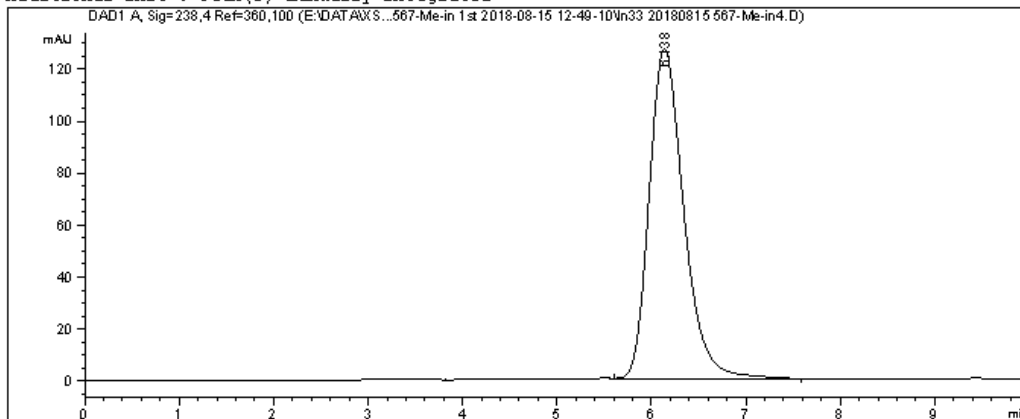

=====  
Area Percent Report  
=====

```
Sorted By      :      Signal
Multiplier     :      1.0000
Dilution       :      1.0000
Do not use Multiplier & Dilution Factor with ISTDs
```

Signal 1: DAD1 A, Sig=238,4 Ref=360,100

| Peak # | RetTime [min] | Type | Width [min] | Area [mAU*s] | Height [mAU] | Area %   |
|--------|---------------|------|-------------|--------------|--------------|----------|
| 1      | 6.138         | BB   | 0.3885      | 3212.19531   | 126.82314    | 100.0000 |

Totals : 3212.19531 126.82314

=====  
\*\*\* End of Report \*\*\*

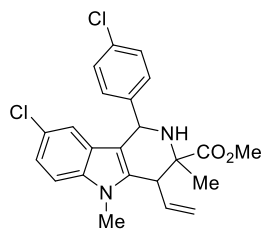

(1R\*,3S\*,4R\*)-3F

Data File E:\DATA\XSM...180719 03-65 5-Cl&Br-in 1st rac 2018-07-20 00-05-23\XSM 201807193.D  
Sample Name: In33 03-65 5-Cl-in 1st rac

```
=====
Acq. Operator   : SYSTEM                      Seq. Line :    4
Acq. Instrument : 1260                      Location  :   87
Injection Date  : 7/20/2018 12:49:11 AM      Inj       :    1
                                           Inj Volume: 5.000 µl

Acq. Method     : E:\DATA\XSM\In33 180719 03-65 5-Cl&Br-in 1st rac 2018-07-20 00-05-23\In33 5
                  -Cl-in 1st AS-98-1mL-248nm-noD.M
Last changed    : 7/20/2018 12:05:23 AM by SYSTEM
Analysis Method : E:\DATA\XSM\In33 180719 03-65 5-Cl&Br-in 1st rac 2018-07-20 00-05-23\In33 5
                  -Cl-in 1st AS-98-1mL-248nm-noD.M (Sequence Method)
Last changed    : 10/7/2018 9:37:32 PM by SYSTEM
                  (modified after loading)
Additional Info  : Peak(s) manually integrated
```

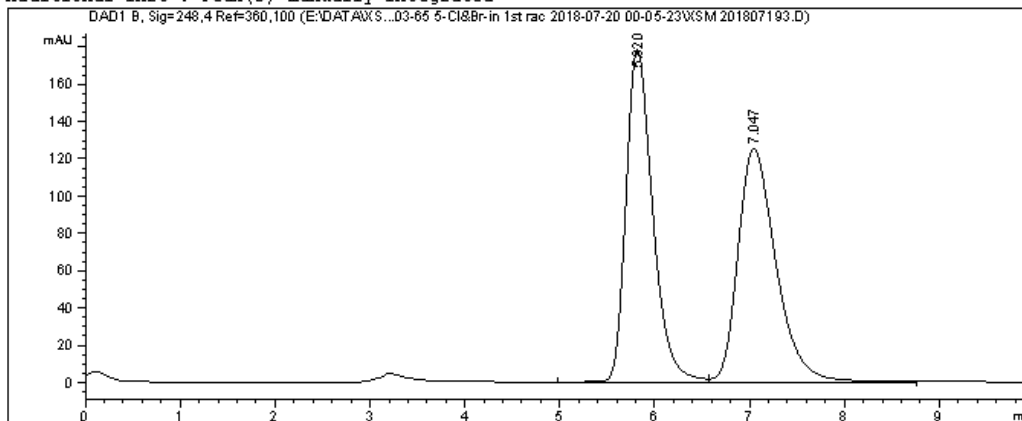

#### Area Percent Report

```
Sorted By      : Signal
Multiplier     : 1.0000
Dilution       : 1.0000
Do not use Multiplier & Dilution Factor with ISTDs
```

Signal 1: DAD1 B, Sig=248,4 Ref=360,100

| Peak # | RetTime [min] | Type | Width [min] | Area [mAU*s] | Height [mAU] | Area %  |
|--------|---------------|------|-------------|--------------|--------------|---------|
| 1      | 5.820         | BV   | 0.3005      | 3499.47021   | 178.64288    | 50.1244 |
| 2      | 7.047         | VB   | 0.4257      | 3482.09717   | 125.50950    | 49.8756 |

Totals : 6981.56738 304.15238

\*\*\* End of Report \*\*\*

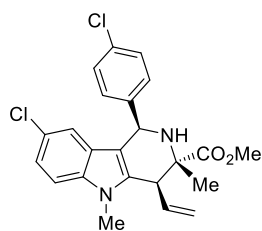

(1R,3S,4R)-3F

Data File E:\DATA\XS...180719 03-65 5-Cl&Br-in 1st rac 2018-07-20 00-05-23\XSM 201807192.D  
 Sample Name: In33 03-64 5-Cl-in R+L opt

```
=====
Acq. Operator   : SYSTEM                      Seq. Line :    3
Acq. Instrument : 1260                      Location  :   88
Injection Date  : 7/20/2018 12:38:17 AM      Inj       :    1
                                           Inj Volume: 5.000 µl
Acq. Method     : E:\DATA\XSM\In33 180719 03-65 5-Cl&Br-in 1st rac 2018-07-20 00-05-23\In33 5
                  -Cl-in 1st AS-98-1mL-248nm-noD.M
Last changed    : 7/20/2018 12:05:23 AM by SYSTEM
Analysis Method : E:\DATA\XSM\In33 180719 03-65 5-Cl&Br-in 1st rac 2018-07-20 00-05-23\In33 5
                  -Cl-in 1st AS-98-1mL-248nm-noD.M (Sequence Method)
Last changed    : 10/7/2018 9:37:32 PM by SYSTEM
                  (modified after loading)
Additional Info  : Peak(s) manually integrated
```

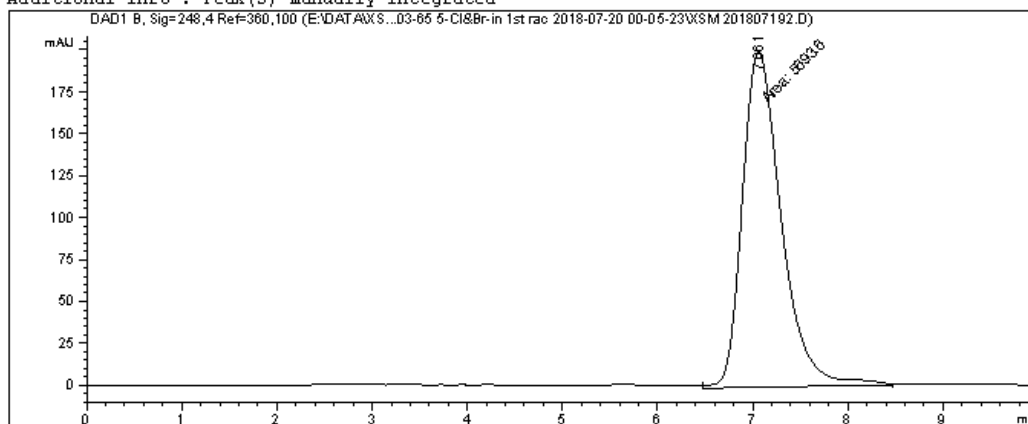

# Area Percent Report

```
Sorted By      : Signal
Multiplier     : 1.0000
Dilution       : 1.0000
Do not use Multiplier & Dilution Factor with ISTDs
```

Signal 1: DAD1 B, Sig=248,4 Ref=360,100

| Peak # | RetTime [min] | Type | Width [min] | Area [mAU*s] | Height [mAU] | Area %   |
|--------|---------------|------|-------------|--------------|--------------|----------|
| 1      | 7.061         | MM   | 0.4749      | 5693.60254   | 199.81715    | 100.0000 |

Totals : 5693.60254 199.81715

\*\*\* End of Report \*\*\*

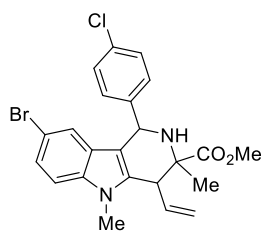

(1*R*\*,3*S*\*,4*R*\*)-3G

Data File E:\DATA\XSM...180721 03-65 5-Cl&Br-in 1st rac 2018-07-21 00-39-20\XSM 201807191.D  
Sample Name: In33 03-65 5-Br-in 1st rac

```
=====
Acq. Operator   : SYSTEM                      Seq. Line :    2
Acq. Instrument : 1260                      Location  :   89
Injection Date  : 7/21/2018 1:01:15 AM      Inj       :    1
                                           Inj Volume: 5.000 µl

Acq. Method     : E:\DATA\XSM\In33 180721 03-65 5-Cl&Br-in 1st rac 2018-07-21 00-39-20\In33 5
                  -Br-in 1st AS-98-1mL-246nm-noD.M
Last changed    : 7/21/2018 12:39:20 AM by SYSTEM
Analysis Method : E:\DATA\XSM\In33 180721 03-65 5-Cl&Br-in 1st rac 2018-07-21 00-39-20\In33 5
                  -Br-in 1st AS-98-1mL-246nm-noD.M (Sequence Method)
Last changed    : 10/7/2018 9:17:25 PM by SYSTEM
                  (modified after loading)
Additional Info  : Peak(s) manually integrated
```

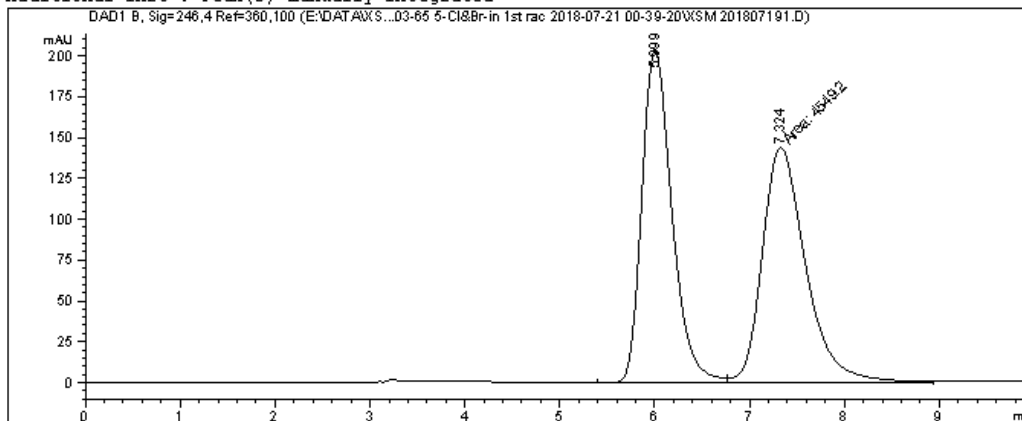

# Area Percent Report

```
Sorted By      : Signal
Multiplier     : 1.0000
Dilution       : 1.0000
Do not use Multiplier & Dilution Factor with ISTDs
```

Signal 1: DAD1 B, Sig=246,4 Ref=360,100

| Peak # | RetTime [min] | Type | Width [min] | Area [mAU*s] | Height [mAU] | Area %  |
|--------|---------------|------|-------------|--------------|--------------|---------|
| 1      | 5.999         | BV   | 0.3379      | 4472.33398   | 203.93315    | 49.5740 |
| 2      | 7.324         | MF   | 0.5267      | 4549.20020   | 143.96623    | 50.4260 |

Totals : 9021.53418 347.89938

\*\*\* End of Report \*\*\*

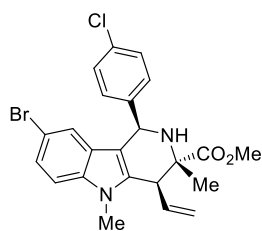

(1R,3S,4R)-3G

Data File E:\DATA\XSM... 180721 03-65 5-Cl&Br-in 1st rac 2018-07-21 00-39-20\XSM 20180719.D  
 Sample Name: In33 03-64 5-Br-in R+L opt

```
=====
Acq. Operator   : SYSTEM                      Seq. Line :    1
Acq. Instrument : 1260                      Location  :   90
Injection Date  : 7/21/2018 12:40:16 AM      Inj       :    1
                                           Inj Volume: 5.000 µl

Acq. Method     : E:\DATA\XSM\In33 180721 03-65 5-Cl&Br-in 1st rac 2018-07-21 00-39-20\In33 5
                  -Br-in 1st AS-98-1mL-246nm-noD.M
Last changed    : 7/21/2018 12:39:20 AM by SYSTEM
Analysis Method : E:\DATA\XSM\In33 180721 03-65 5-Cl&Br-in 1st rac 2018-07-21 00-39-20\In33 5
                  -Br-in 1st AS-98-1mL-246nm-noD.M (Sequence Method)
Last changed    : 1/4/2019 3:44:49 PM by SYSTEM
                  (modified after loading)
Additional Info : Peak(s) manually integrated
=====
```

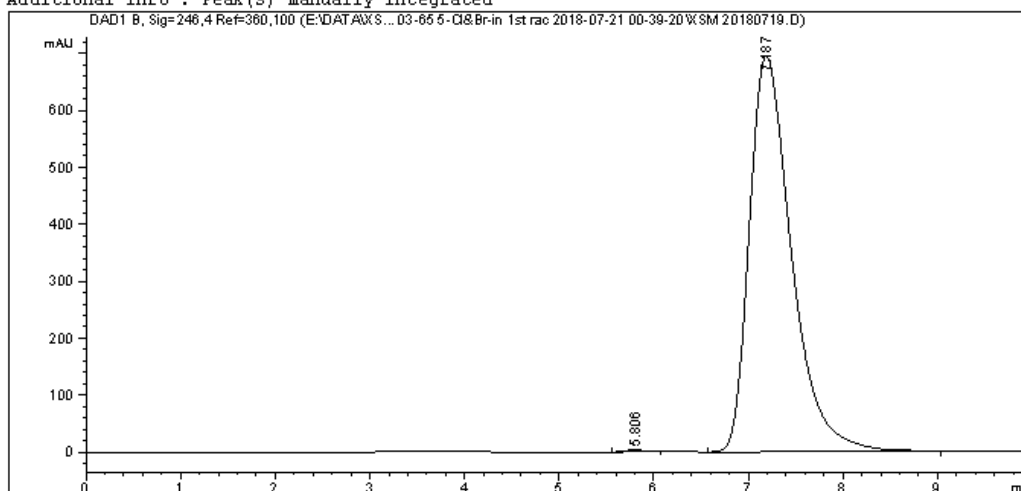

=====  
 Area Percent Report  
 =====

```
Sorted By      :      Signal
Multiplier     :      1.0000
Dilution       :      1.0000
Do not use Multiplier & Dilution Factor with ISTDs
```

Signal 1: DAD1 B, Sig=246,4 Ref=360,100

| Peak # | RetTime [min] | Type | Width [min] | Area [mAU*s] | Height [mAU] | Area %  |
|--------|---------------|------|-------------|--------------|--------------|---------|
| 1      | 5.806         | BB   | 0.2429      | 37.00833     | 2.49690      | 0.1722  |
| 2      | 7.187         | BB   | 0.4722      | 2.14517e4    | 694.81281    | 99.8278 |

Totals :                      2.14887e4    697.30971

=====  
 \*\*\* End of Report \*\*\*

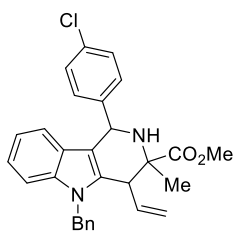

(1R\*,3S\*,4R\*)-3H

Data File E:\DATA\XSM\In33 180714 03-61 N-Bn 1st 2018-07-14 20-53-39\XSM-201807141.D  
Sample Name: In33 03-61 N-Bn 1st rac

```
=====
Acq. Operator   : SYSTEM                      Seq. Line :    2
Acq. Instrument : 1260                      Location  :    7
Injection Date  : 7/14/2018 9:15:39 PM      Inj       :    1
                                           Inj Volume: 15.000 µl

Acq. Method     : E:\DATA\XSM\In33 180714 03-61 N-Bn 1st 2018-07-14 20-53-39\In33 1st AS-98-0
                  .5mL-228nm N-Bn.M
Last changed    : 7/14/2018 8:53:39 PM by SYSTEM
Analysis Method : E:\DATA\XSM\In33 180714 03-61 N-Bn 1st 2018-07-14 20-53-39\In33 1st AS-98-0
                  .5mL-228nm N-Bn.M (Sequence Method)
Last changed    : 10/7/2018 9:43:59 PM by SYSTEM
                  (modified after loading)
Additional Info  : Peak(s) manually integrated
```

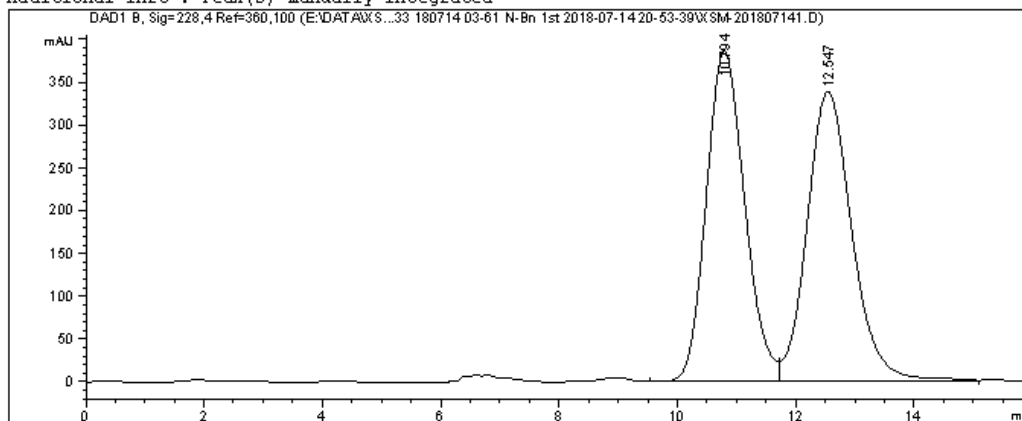

#### Area Percent Report

```
Sorted By      : Signal
Multiplier     : 1.0000
Dilution       : 1.0000
Do not use Multiplier & Dilution Factor with ISTDs
```

Signal 1: DAD1 B, Sig=228,4 Ref=360,100

| Peak # | RetTime [min] | Type | Width [min] | Area [mAU*s] | Height [mAU] | Area %  |
|--------|---------------|------|-------------|--------------|--------------|---------|
| 1      | 10.794        | BV   | 0.6737      | 1.73875e4    | 385.85895    | 49.5282 |
| 2      | 12.547        | VB   | 0.8059      | 1.77188e4    | 337.80804    | 50.4718 |

Totals : 3.51063e4 723.66699

\*\*\* End of Report \*\*\*

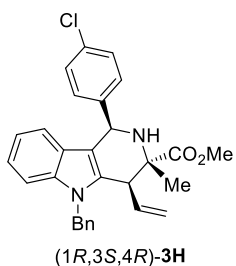

Data File E:\DATA\XSM\In33 180714 03-61 N-Bn 1st 2018-07-14 20-53-39\XSM-20180714.D  
 Sample Name: In33 03-58 N-Bn R+L opt

```
=====
Acq. Operator   : SYSTEM                      Seq. Line :    1
Acq. Instrument : 1260                      Location  :    8
Injection Date  : 7/14/2018 8:54:37 PM        Inj       :    1
                                           Inj Volume: 15.000 µl

Acq. Method     : E:\DATA\XSM\In33 180714 03-61 N-Bn 1st 2018-07-14 20-53-39\In33 1st AS-98-0
                  .5mL-228nm N-Bn.M
Last changed    : 7/14/2018 8:53:39 PM by SYSTEM
Analysis Method : E:\DATA\XSM\In33 180714 03-61 N-Bn 1st 2018-07-14 20-53-39\In33 1st AS-98-0
                  .5mL-228nm N-Bn.M (Sequence Method)
Last changed    : 10/7/2018 9:43:59 PM by SYSTEM
                  (modified after loading)
Additional Info  : Peak(s) manually integrated
```

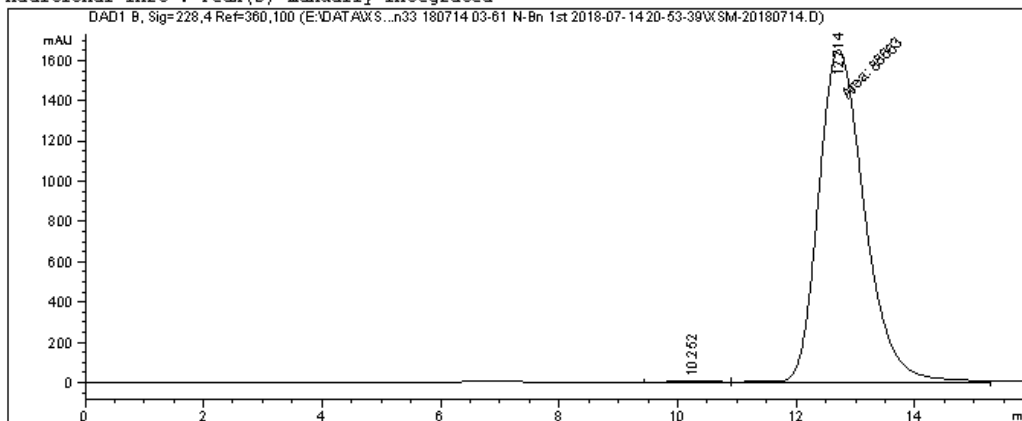

```
=====
                          Area Percent Report
=====
```

```
Sorted By      :      Signal
Multiplier     :      1.0000
Dilution       :      1.0000
Do not use Multiplier & Dilution Factor with ISTDs
```

Signal 1: DAD1 B, Sig=228,4 Ref=360,100

| Peak # | RetTime [min] | Type | Width [min] | Area [mAU*s] | Height [mAU] | Area %  |
|--------|---------------|------|-------------|--------------|--------------|---------|
| 1      | 10.252        | BB   | 0.5677      | 288.47180    | 7.25743      | 0.3243  |
| 2      | 12.714        | MF   | 0.8955      | 8.86630e4    | 1650.15454   | 99.6757 |

Totals :                      8.89515e4 1657.41197

```
=====
*** End of Report ***
```

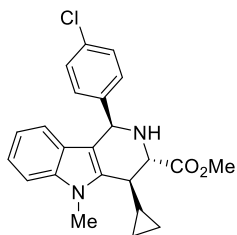

(1R\*,3S\*,4R\*)-4

Data File E:\DATA\XSM\In33 190612 aH H2&Cc DAD div 2019-06-12 22-54-46\XSM 201906121.D  
Sample Name: In33 04-125 4-Cl-aH CH2N2 4p div

```
=====
Acq. Operator   : SYSTEM                      Seq. Line :    2
Acq. Instrument : 1260                      Location  :   80
Injection Date  : 6/12/2019 11:38:09 PM      Inj       :    1
                                           Inj Volume: 5.000 µl
Acq. Method     : E:\DATA\XSM\In33 190612 aH H2&Cc DAD div 2019-06-12 22-54-46\In33 AD-98-
                  40min-282nm 4-Cl-aH div.M
Last changed    : 6/12/2019 10:54:48 PM by SYSTEM
Analysis Method : E:\DATA\XSM\In33 190612 aH H2&Cc DAD div 2019-06-12 22-54-46\In33 AD-98-
                  40min-282nm 4-Cl-aH div.M (Sequence Method)
Last changed    : 7/12/2019 11:30:29 AM by SYSTEM
                  (modified after loading)
=====
```

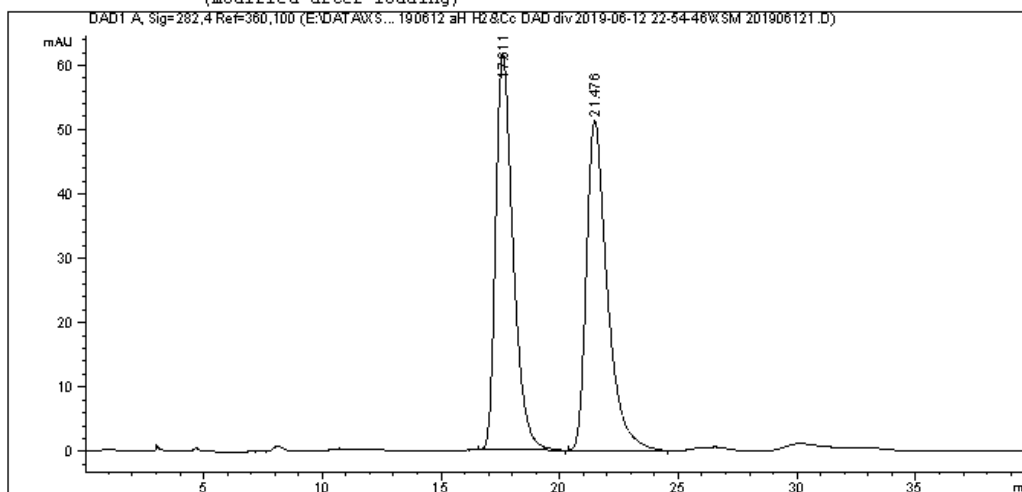

# Area Percent Report

```
Sorted By      : Signal
Multiplier     : 1.0000
Dilution       : 1.0000
Do not use Multiplier & Dilution Factor with ISTDs
```

Signal 1: DAD1 A, Sig=282,4 Ref=360,100

| Peak # | RetTime [min] | Type | Width [min] | Area [mAU*s] | Height [mAU] | Area %  |
|--------|---------------|------|-------------|--------------|--------------|---------|
| 1      | 17.611        | BB   | 0.7288      | 3127.87769   | 61.35547     | 49.9906 |
| 2      | 21.476        | BB   | 0.8468      | 3129.04858   | 51.21708     | 50.0094 |

Totals : 6256.92627 112.57256

\*\*\* End of Report \*\*\*

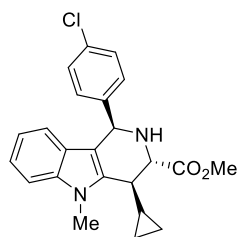

(1R,3S,4R)-4

Data File E:\DATA\XSM\In33 190711 04-129 aH HBpin opt 2019-07-11 16-55-26\XSM 201907113.D  
 Sample Name: In33 04-125 4-Cl-aH CH2N2 R+L SM

```
=====
Acq. Operator   : SYSTEM                      Seq. Line :    4
Acq. Instrument : 1260                      Location  :   90
Injection Date  : 7/11/2019 6:21:00 PM        Inj       :    1
                                           Inj Volume: 5.000 µl

Acq. Method     : E:\DATA\XSM\In33 190711 04-129 aH HBpin opt 2019-07-11 16-55-26\In33 AD-98-
                  40min-282nm 4-Cl-aH div.M
Last changed    : 7/11/2019 5:16:13 PM by SYSTEM
Analysis Method : E:\DATA\XSM\In33 190711 04-129 aH HBpin opt 2019-07-11 16-55-26\In33 AD-98-
                  40min-282nm 4-Cl-aH div.M (Sequence Method)
Last changed    : 7/11/2019 9:24:31 PM by SYSTEM
                  (modified after loading)
Additional Info : Peak(s) manually integrated
```

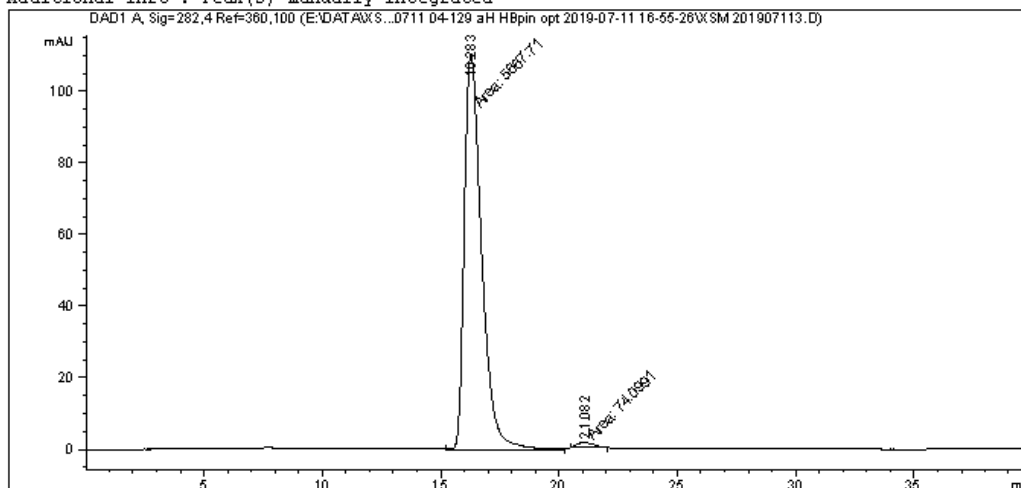

# Area Percent Report

```
Sorted By      : Signal
Multiplier     : 1.0000
Dilution       : 1.0000
Do not use Multiplier & Dilution Factor with ISTDs
```

Signal 1: DAD1 A, Sig=282,4 Ref=360,100

| Peak # | RetTime [min] | Type | Width [min] | Area [mAU*s] | Height [mAU] | Area %  |
|--------|---------------|------|-------------|--------------|--------------|---------|
| 1      | 16.283        | MM   | 0.8550      | 5667.71289   | 110.48399    | 98.7095 |
| 2      | 21.082        | MM   | 0.8759      | 74.09912     | 1.41000      | 1.2905  |

Totals : 5741.81201 111.89399

\*\*\* End of Report \*\*\*

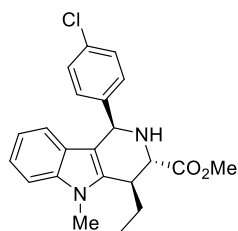

(1R\*,3S\*,4R\*)-5

Data File E:\DATA\XSM\In33 190713 04-140 4-Cl-aH H2 rac 2019-07-13 23-01-29\XSM 20190713.D  
Sample Name: In33 04-140 4-Cl-aH H2 1st rac

```
=====
Acq. Operator   : SYSTEM                      Seq. Line :    1
Acq. Instrument : 1260                      Location  :   50
Injection Date  : 7/13/2019 11:03:02 PM      Inj       :    1
                                           Inj Volume: 5.000 µl

Acq. Method     : E:\DATA\XSM\In33 190713 04-140 4-Cl-aH H2 rac 2019-07-13 23-01-29\In33 IE-
98-20min-232nm 4-Cl-aH H2.M
Last changed    : 7/13/2019 11:17:48 PM by SYSTEM
(modified after loading)
Analysis Method : E:\DATA\XSM\In33 190713 04-140 4-Cl-aH H2 rac 2019-07-13 23-01-29\In33 IE-
98-20min-232nm 4-Cl-aH H2.M (Sequence Method)
Last changed    : 7/13/2019 11:25:50 PM by SYSTEM
(modified after loading)
Additional Info  : Peak(s) manually integrated
```

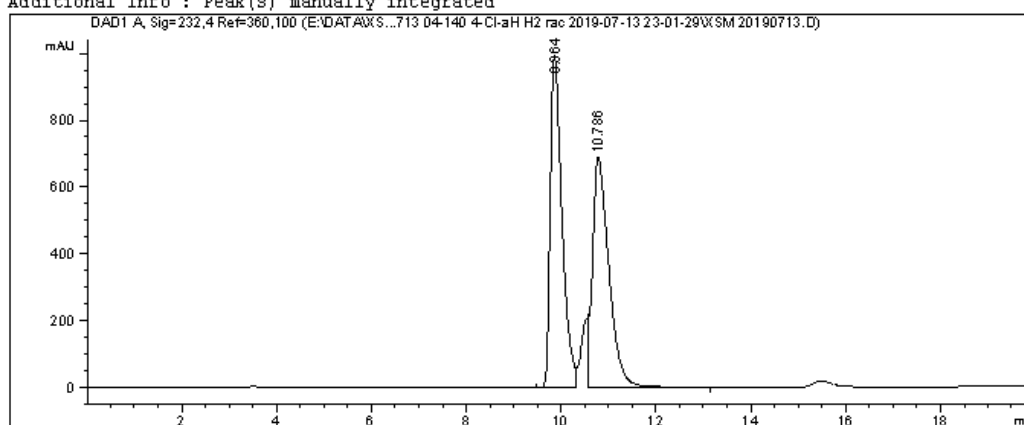

# Area Percent Report

```
Sorted By      : Signal
Multiplier     : 1.0000
Dilution       : 1.0000
Do not use Multiplier & Dilution Factor with ISTDs
```

Signal 1: DAD1 A, Sig=232,4 Ref=360,100

| Peak # | RetTime [min] | Type | Width [min] | Area [mAU*s] | Height [mAU] | Area %  |
|--------|---------------|------|-------------|--------------|--------------|---------|
| 1      | 9.864         | BV   | 0.2546      | 1.69340e4    | 994.99597    | 50.3875 |
| 2      | 10.786        | VB   | 0.3650      | 1.66735e4    | 689.77911    | 49.6125 |

Totals : 3.36075e4 1684.77509

\*\*\* End of Report \*\*\*

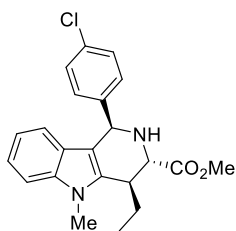

(1R,3S,4R)-5

Data File E:\DATA\XS... 190618 aH H2&CH2N2&DIBAL-H opt 2019-06-17 23-17-48\XSM 201906122.D  
Sample Name: In33 04-78 4-Cl-aH H2 R+L opt

```
=====
Acq. Operator   : SYSTEM                      Seq. Line :    3
Acq. Instrument : 1260                      Location  :   69
Injection Date  : 6/18/2019 12:32:41 AM      Inj       :    1
                                           Inj Volume: 5.000 µl
Acq. Method     : E:\DATA\XSM\In33 190618 aH H2&CH2N2&DIBAL-H opt 2019-06-17 23-17-48\In33 IE
                                           -98-20min-232nm 4-Cl-aH H2.M
Last changed    : 6/17/2019 11:17:49 PM by SYSTEM
Analysis Method : E:\DATA\XSM\In33 190618 aH H2&CH2N2&DIBAL-H opt 2019-06-17 23-17-48\In33 IE
                                           -98-20min-232nm 4-Cl-aH H2.M (Sequence Method)
Last changed    : 7/13/2019 11:17:30 PM by SYSTEM
                                           (modified after loading)
Additional Info : Peak(s) manually integrated
=====
```

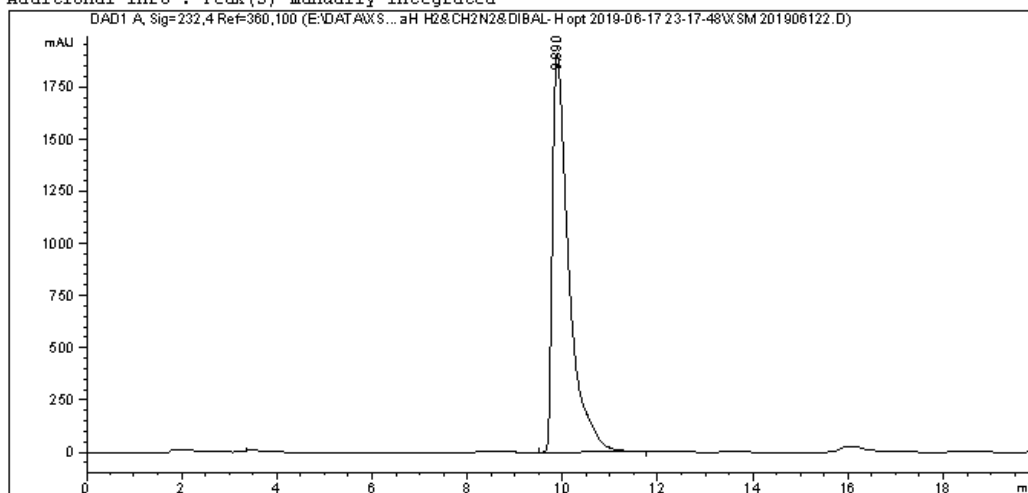

# Area Percent Report

```
Sorted By      : Signal
Multiplier     : 1.0000
Dilution       : 1.0000
Do not use Multiplier & Dilution Factor with ISTDs
```

Signal 1: DAD1 A, Sig=232,4 Ref=360,100

| Peak # | RetTime [min] | Type | Width [min] | Area [mAU*s] | Height [mAU] | Area %   |
|--------|---------------|------|-------------|--------------|--------------|----------|
| 1      | 9.890         | BB   | 0.3472      | 4.55006e4    | 1901.31982   | 100.0000 |

Totals : 4.55006e4 1901.31982

\*\*\* End of Report \*\*\*

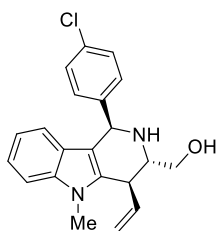

(1R\*,3S\*,4R\*)-6

Data File E:\DATA\XS...503 04-81&83 aH-DIBAL-H&Ph2N-aH 2019-05-03 20-30-56\XSM 201905031.D  
Sample Name: In33 04-83 4-Cl-aH DIBAL-H rac

```
=====
Acq. Operator   : SYSTEM                      Seq. Line :    2
Acq. Instrument : 1260                      Location  :    70
Injection Date  : 5/3/2019 9:03:59 PM        Inj       :    1
                                           Inj Volume: 5.000 µl

Acq. Method     : E:\DATA\XSM\In33 190503 04-81&83 aH-DIBAL-H&Ph2N-aH 2019-05-03 20-30-56
                  \In33 AD-85-40min-282nm 4-Cl-aH DIBAL-H.M
Last changed    : 5/3/2019 8:30:56 PM by SYSTEM
Analysis Method : E:\DATA\XSM\In33 190503 04-81&83 aH-DIBAL-H&Ph2N-aH 2019-05-03 20-30-56
                  \In33 AD-85-40min-282nm 4-Cl-aH DIBAL-H.M (Sequence Method)
Last changed    : 7/12/2019 11:33:30 AM by SYSTEM
                  (modified after loading)
Additional Info : Peak(s) manually integrated
```

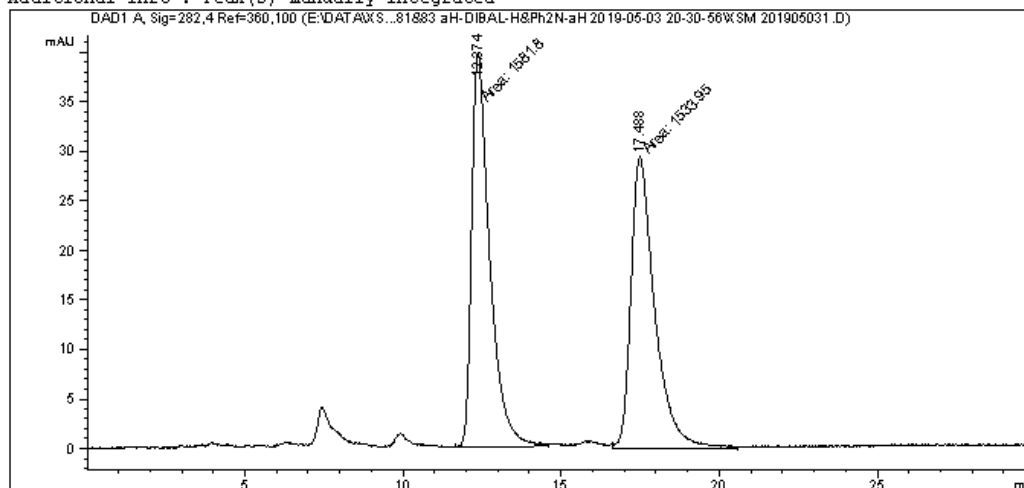

# Area Percent Report

```
Sorted By      : Signal
Multiplier     : 1.0000
Dilution       : 1.0000
Do not use Multiplier & Dilution Factor with ISTDs
```

Signal 1: DAD1 A, Sig=282,4 Ref=360,100

| Peak # | RetTime [min] | Type | Width [min] | Area [mAU*s] | Height [mAU] | Area %  |
|--------|---------------|------|-------------|--------------|--------------|---------|
| 1      | 12.374        | MM   | 0.6643      | 1581.80078   | 39.68710     | 50.7679 |
| 2      | 17.488        | MM   | 0.8704      | 1533.95032   | 29.37140     | 49.2321 |

Totals : 3115.75110 69.05849

\*\*\* End of Report \*\*\*

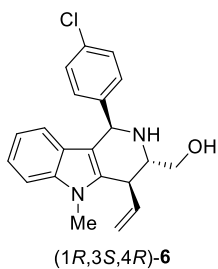

Data File E:\DATA\XSM\In33 190708 aH DIBAL-H R&L opt 2019-07-08 16-38-32\XSM 20190708.D  
 Sample Name: In33 04-83 4-Cl-aH DIBAL-H R+L opt

```
=====
Acq. Operator   : SYSTEM                      Seq. Line :    1
Acq. Instrument : 1260                      Location  :   90
Injection Date  : 7/8/2019 4:40:04 PM        Inj       :    1
                                           Inj Volume: 5.000 µl

Acq. Method     : E:\DATA\XSM\In33 190708 aH DIBAL-H R&L opt 2019-07-08 16-38-32\In33 AD-85-
                  40min-282nm 4-Cl-aH DIBAL-H.M
Last changed    : 7/8/2019 4:38:33 PM by SYSTEM
Analysis Method : E:\DATA\XSM\In33 190708 aH DIBAL-H R&L opt 2019-07-08 16-38-32\In33 AD-85-
                  40min-282nm 4-Cl-aH DIBAL-H.M (Sequence Method)
Last changed    : 7/8/2019 7:25:49 PM by SYSTEM
                  (modified after loading)
Additional Info : Peak(s) manually integrated
```

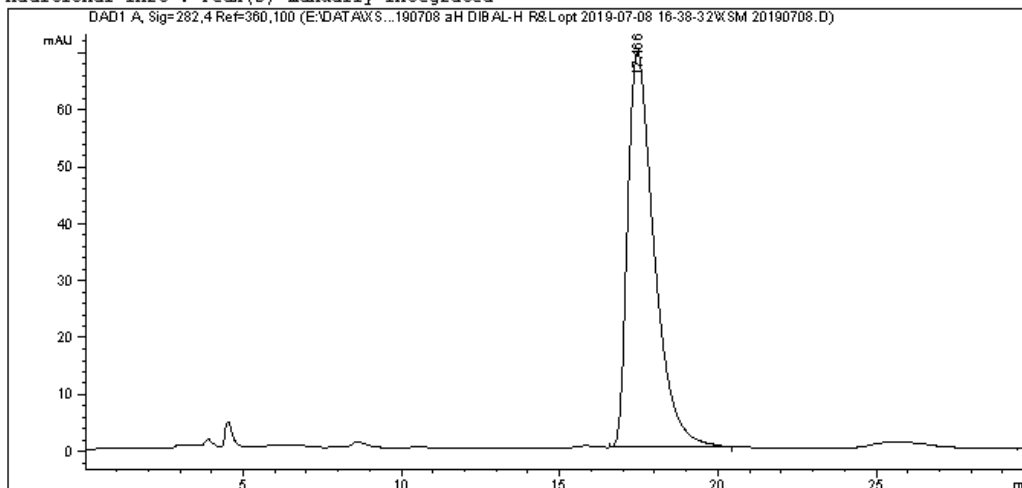

#### Area Percent Report

```
Sorted By      : Signal
Multiplier     : 1.0000
Dilution       : 1.0000
Do not use Multiplier & Dilution Factor with ISTDs
```

Signal 1: DAD1 A, Sig=282,4 Ref=360,100

| Peak # | RetTime [min] | Type | Width [min] | Area [mAU*s] | Height [mAU] | Area %   |
|--------|---------------|------|-------------|--------------|--------------|----------|
| 1      | 17.466        | BB   | 0.8165      | 4043.36670   | 69.22164     | 100.0000 |

Totals : 4043.36670 69.22164

\*\*\* End of Report \*\*\*

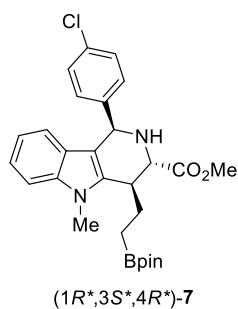

Data File E:\DATA\XSM\In33 190709 04-129 4-Cl-aH HBpin 2019-07-09 12-51-58\XSM 201907091.D  
Sample Name: In33 04-130 4-Cl-aH HBpin rac

```
=====
Acq. Operator   : SYSTEM                      Seq. Line :    2
Acq. Instrument : 1260                      Location  :   60
Injection Date  : 7/9/2019 1:18:55 PM        Inj       :    1
                                           Inj Volume: 5.000 µl
Acq. Method     : E:\DATA\XSM\In33 190709 04-129 4-Cl-aH HBpin 2019-07-09 12-51-58\In33 0D-95
                  -228nm-30min aH HBpin.M
Last changed    : 7/9/2019 1:17:13 PM by SYSTEM
Analysis Method : E:\DATA\XSM\In33 190709 04-129 4-Cl-aH HBpin 2019-07-09 12-51-58\In33 0D-95
                  -228nm-30min aH HBpin.M (Sequence Method)
Last changed    : 7/12/2019 11:27:53 AM by SYSTEM
                  (modified after loading)
Additional Info : Peak(s) manually integrated
```

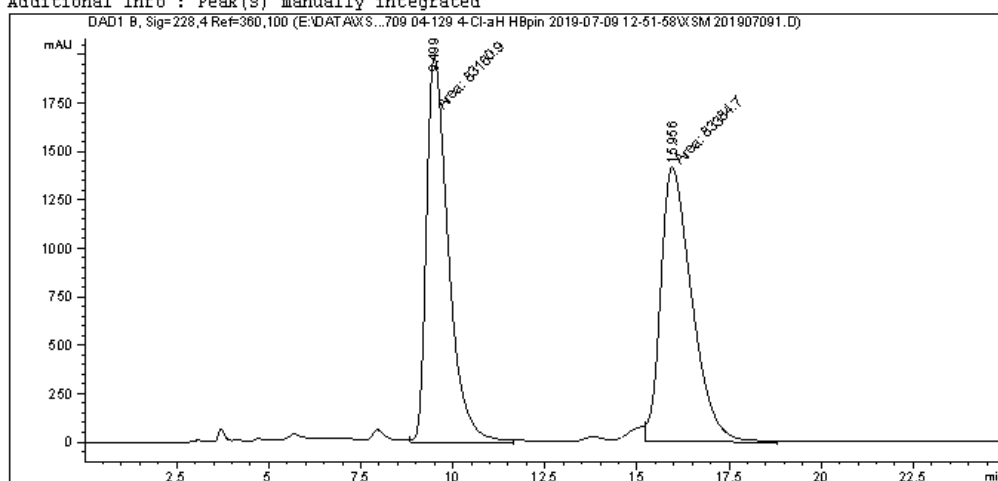

#### Area Percent Report

```
Sorted By      : Signal
Multiplier     : 1.0000
Dilution       : 1.0000
Do not use Multiplier & Dilution Factor with ISTDs
```

Signal 1: DAD1 B, Sig=228,4 Ref=360,100

| Peak # | RetTime [min] | Type | Width [min] | Area [mAU*s] | Height [mAU] | Area %  |
|--------|---------------|------|-------------|--------------|--------------|---------|
| 1      | 9.499         | MM   | 0.6960      | 8.31609e4    | 1991.51025   | 49.9328 |
| 2      | 15.956        | FM   | 0.9812      | 8.33847e4    | 1416.34082   | 50.0672 |

Totals : 1.66546e5 3407.85107

\*\*\* End of Report \*\*\*

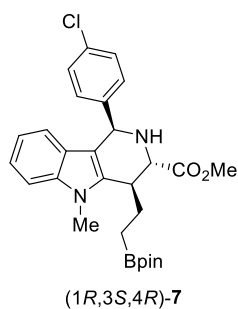

Data File E:\DATA\XSM\In33 190711 04-129 aH HBpin opt 2019-07-11 16-55-26\XSM 20190711.D  
Sample Name: In33 04-129 4-Cl-aH HBpin R+L opt

```
=====
Acq. Operator   : SYSTEM                      Seq. Line :    1
Acq. Instrument : 1260                      Location  :   89
Injection Date  : 7/11/2019 4:56:22 PM      Inj       :    1
                                           Inj Volume: 5.000 µl
Acq. Method     : E:\DATA\XSM\In33 190711 04-129 aH HBpin opt 2019-07-11 16-55-26\In33 OD-95-
                  228nm-30min aH HBpin.M
Last changed    : 7/11/2019 4:55:26 PM by SYSTEM
Analysis Method : E:\DATA\XSM\In33 190711 04-129 aH HBpin opt 2019-07-11 16-55-26\In33 OD-95-
                  228nm-30min aH HBpin.M (Sequence Method)
Last changed    : 7/11/2019 9:36:32 PM by SYSTEM
                  (modified after loading)
Additional Info : Peak(s) manually integrated
```

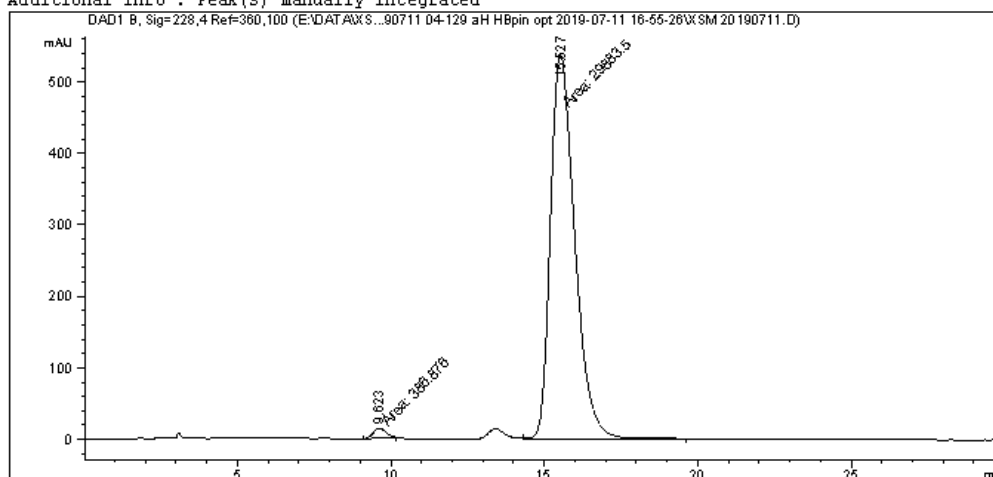

```
=====
                          Area Percent Report
=====
```

```
Sorted By      :      Signal
Multiplier     :      1.0000
Dilution       :      1.0000
Do not use Multiplier & Dilution Factor with ISTDs
```

Signal 1: DAD1 B, Sig=228,4 Ref=360,100

| Peak # | RetTime [min] | Type | Width [min] | Area [mAU*s] | Height [mAU] | Area %  |
|--------|---------------|------|-------------|--------------|--------------|---------|
| 1      | 9.623         | MM   | 0.4774      | 386.87567    | 13.50646     | 1.2781  |
| 2      | 15.527        | MM   | 0.9265      | 2.98835e4    | 537.56525    | 98.7219 |

Totals : 3.02704e4 551.07171

```
=====
*** End of Report ***
```

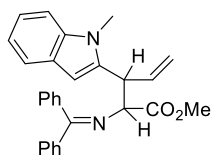

(2R\*,3S\*)-9 and (2R\*,3R\*)-9

Data File E:\DATA\XSM\In33 190426 04-81 Ph2N-aH OD 1st 2019-04-26 22-32-16\XSM 201904262.D  
 Sample Name: In33 04-81 Ph2N-aH 1st rac

```
=====
Acq. Operator   : SYSTEM                      Seq. Line :    3
Acq. Instrument : 1260                      Location  :   80
Injection Date  : 4/26/2019 11:36:47 PM      Inj       :    1
                                           Inj Volume: 5.000 µl
Acq. Method     : E:\DATA\XSM\In33 190426 04-81 Ph2N-aH OD 1st 2019-04-26 22-32-16\In33 OD-98
                  -1mL-226nm-30min Ph2N-aH 1st.M
Last changed    : 4/26/2019 10:32:16 PM by SYSTEM
Analysis Method : E:\DATA\XSM\In33 190426 04-81 Ph2N-aH OD 1st 2019-04-26 22-32-16\In33 OD-98
                  -1mL-226nm-30min Ph2N-aH 1st.M (Sequence Method)
Last changed    : 6/7/2019 4:07:04 PM by SYSTEM
                  (modified after loading)
Additional Info : Peak(s) manually integrated
```

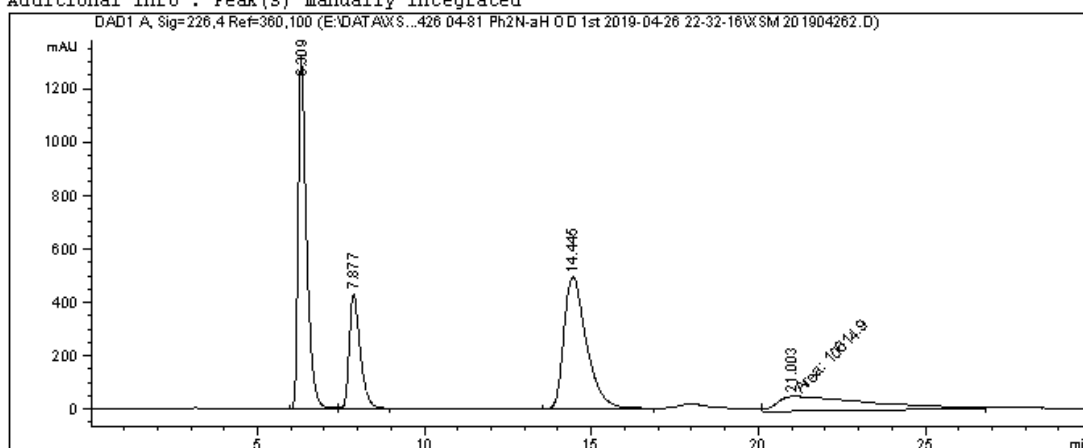

# Area Percent Report

```
Sorted By      :      Signal
Multiplier     :      1.0000
Dilution       :      1.0000
Do not use Multiplier & Dilution Factor with ISTDs
```

Signal 1: DAD1 A, Sig=226,4 Ref=360,100

| Peak # | RetTime [min] | Type | Width [min] | Area [mAU*s] | Height [mAU] | Area %  |
|--------|---------------|------|-------------|--------------|--------------|---------|
| 1      | 6.309         | BV R | 0.2607      | 2.32634e4    | 1319.42493   | 34.7684 |
| 2      | 7.877         | VB   | 0.3342      | 9833.45313   | 429.37863    | 14.6966 |
| 3      | 14.445        | BV R | 0.6574      | 2.31979e4    | 494.38535    | 34.6705 |
| 4      | 21.003        | MM   | 3.1997      | 1.06149e4    | 55.29118     | 15.8645 |

Totals : 6.69097e4 2298.48008

\*\*\* End of Report \*\*\*

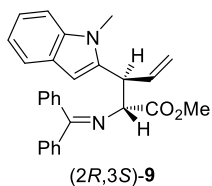

Data File E:\DATA\XSM\In33 190426 04-81 Ph2N-aH OD 1st 2019-04-26 22-32-16\XSM 20190426.D  
 Sample Name: In33 04-78 Ph2N-aH S+D opt

```
=====
Acq. Operator   : SYSTEM                      Seq. Line :    1
Acq. Instrument : 1260                      Location  :   78
Injection Date  : 4/26/2019 10:33:43 PM      Inj       :    1
                                           Inj Volume: 5.000 µl
Acq. Method     : E:\DATA\XSM\In33 190426 04-81 Ph2N-aH OD 1st 2019-04-26 22-32-16\In33 OD-98
                  -1mL-226nm-30min Ph2N-aH 1st.M
Last changed    : 4/26/2019 10:32:16 PM by SYSTEM
Analysis Method : E:\DATA\XSM\In33 190426 04-81 Ph2N-aH OD 1st 2019-04-26 22-32-16\In33 OD-98
                  -1mL-226nm-30min Ph2N-aH 1st.M (Sequence Method)
Last changed    : 6/7/2019 4:07:04 PM by SYSTEM
                  (modified after loading)
Additional Info : Peak(s) manually integrated
```

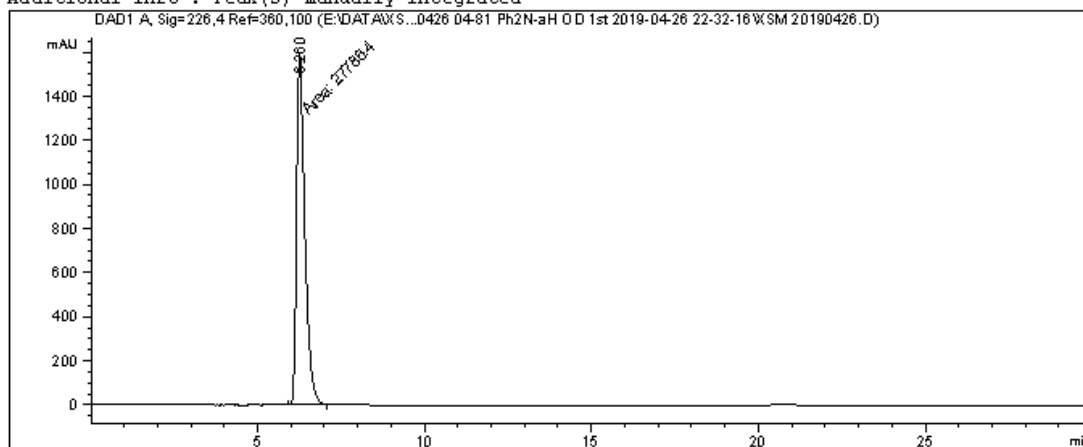

```
=====
                          Area Percent Report
=====
```

```
Sorted By      :      Signal
Multiplier     :      1.0000
Dilution       :      1.0000
Do not use Multiplier & Dilution Factor with ISTDs
```

Signal 1: DAD1 A, Sig=226,4 Ref=360,100

| Peak # | RetTime [min] | Type | Width [min] | Area [mAU*s] | Height [mAU] | Area %   |
|--------|---------------|------|-------------|--------------|--------------|----------|
| 1      | 6.260         | MF   | 0.2912      | 2.77864e4    | 1590.33875   | 100.0000 |

Totals : 2.77864e4 1590.33875

```
=====
*** End of Report ***
```

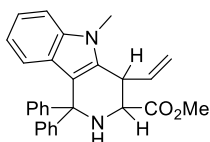

(3R\*,4S\*)-10 and (3R\*,4R\*)-10

Data File E:\DATA\XSM\In33 190511 04-94 Ph2N-aH P-S 2019-05-14 20-39-23\XSM 201905141.D

Sample Name: In33 04-104 Ph2N-aH P-S rac

```
=====
Acq. Operator   : SYSTEM                      Seq. Line :    2
Acq. Instrument : 1260                      Location  :   80
Injection Date  : 5/14/2019 9:07:24 PM      Inj       :    1
                                           Inj Volume: 5.000 µl
Acq. Method     : E:\DATA\XSM\In33 190511 04-94 Ph2N-aH P-S 2019-05-14 20-39-23\In33 AD-98-
                  25min-226nm Ph2N-aH P-S.M
Last changed    : 5/14/2019 8:39:23 PM by SYSTEM
Analysis Method : E:\DATA\XSM\In33 190511 04-94 Ph2N-aH P-S 2019-05-14 20-39-23\In33 AD-98-
                  25min-226nm Ph2N-aH P-S.M (Sequence Method)
Last changed    : 5/25/2019 12:17:14 PM by SYSTEM
                  (modified after loading)
Additional Info : Peak(s) manually integrated
=====
```

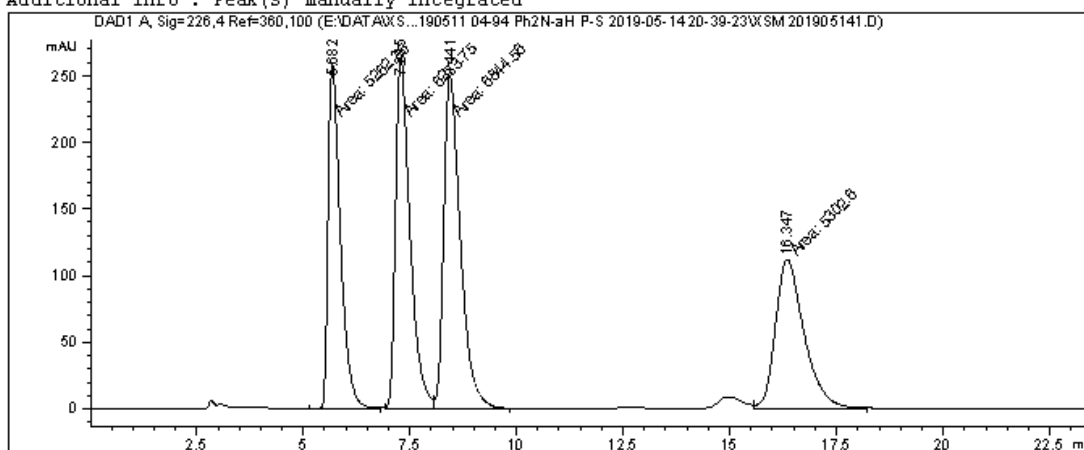

# Area Percent Report

```
Sorted By      : Signal
Multiplier     : 1.0000
Dilution       : 1.0000
Do not use Multiplier & Dilution Factor with ISTDs
```

Signal 1: DAD1 A, Sig=226,4 Ref=360,100

| Peak # | RetTime [min] | Type | Width [min] | Area [mAU*s] | Height [mAU] | Area %  |
|--------|---------------|------|-------------|--------------|--------------|---------|
| 1      | 5.682         | MM   | 0.3384      | 5262.25977   | 259.18512    | 22.2194 |
| 2      | 7.285         | MF   | 0.3942      | 6273.75098   | 265.25311    | 26.4903 |
| 3      | 8.441         | FM   | 0.4560      | 6844.55518   | 250.16869    | 28.9005 |
| 4      | 16.347        | MM   | 0.7851      | 5302.60205   | 112.56172    | 22.3897 |

Totals : 2.36832e4 887.16864

\*\*\* End of Report \*\*\*

1260 5/25/2019 12:17:19 PM SYSTEM

Page 1 of 1

Supplementary Figure 206. HPLC spectrum of (3R\*,4S\*)-10 and (3R\*,4R\*)-10

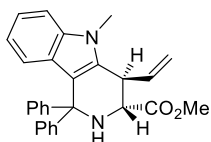

(3R,4S)-10

Data File E:\DATA\XS...90615 04-125 Ph2N-aH P-S S&D opt 2019-06-15 20-14-08\XSM 20190615.D

Sample Name: In33 04-125 Ph2N-aH S+D P-S opt

```
=====
Acq. Operator   : SYSTEM                      Seq. Line :    1
Acq. Instrument : 1260                      Location  :   78
Injection Date  : 6/15/2019 8:15:40 PM       Inj       :    1
                                           Inj Volume: 5.000 µl
Acq. Method     : E:\DATA\XSM\In33 190615 04-125 Ph2N-aH P-S S&D opt 2019-06-15 20-14-08\In33
                  AD-98-25min-226nm Ph2N-aH P-S.M
Last changed    : 6/15/2019 8:14:08 PM by SYSTEM
Analysis Method : E:\DATA\XSM\In33 190615 04-125 Ph2N-aH P-S S&D opt 2019-06-15 20-14-08\In33
                  AD-98-25min-226nm Ph2N-aH P-S.M (Sequence Method)
Last changed    : 6/17/2019 11:04:31 PM by SYSTEM
                  (modified after loading)
Additional Info : Peak(s) manually integrated
=====
```

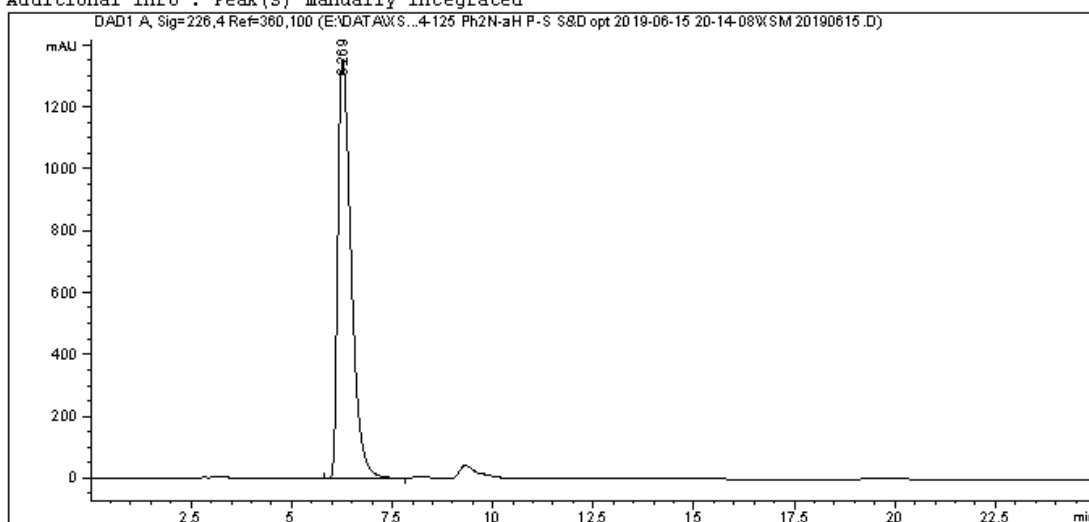

# Area Percent Report

```
=====
Sorted By      :      Signal
Multiplier     :      1.0000
Dilution       :      1.0000
Do not use Multiplier & Dilution Factor with ISTDs
=====
```

Signal 1: DAD1 A, Sig=226,4 Ref=360,100

| Peak # | RetTime [min] | Type | Width [min] | Area [mAU*s] | Height [mAU] | Area %   |
|--------|---------------|------|-------------|--------------|--------------|----------|
| 1      | 6.269         | BB   | 0.3562      | 3.10651e4    | 1351.41418   | 100.0000 |

Totals : 3.10651e4 1351.41418

\*\*\* End of Report \*\*\*

## Supplementary References

1. Wang, C. J., Liang, G., Xue, Z. Y. & Gao, F. Highly enantioselective 1,3-dipolar cycloaddition of azomethine ylides catalyzed by Copper(I)/TF-BiphamPhos complexes. *J. Am. Chem. Soc.* **130**, 17250-17251 (2008).
2. Sha, F., Tao, Y., Tang, C. Y., Zhang, F. & Wu, X. Y. Construction of benzo[c]carbazoles and their antitumor derivatives through the Diels–Alder reaction of 2-alkenylindoles and arynes. *J. Org. Chem.* **80**, 8122-8133 (2015).
3. Richards, C. J. & Mulvaney, A. W. Synthesis of phosphinoferrocenyloxazolines. New ligands for asymmetric catalysis. *Tetrahedron: Asymmetry* **7**, 1419-1430 (1996).
4. Smith, C. R., Mans, D. J. & Rajanbabu, T. V. (*R*)-2,2'-Binaphthoyl-(*S,S*)-di(1-phenylethyl) aminophosphine. Scalable protocols for the syntheses of phosphoramidite (Feringa) ligands. *Org. Synth.* **85**, 238-247 (2008).
5. Spangenberg, T., Schoenfelder, A., Breit, B. & Mann, A. A new method for the synthesis of chiral  $\beta$ -branched  $\alpha$ -amino acids. *Org. Lett.* **9**, 3881-3884 (2007).
6. Huang, L., Dai, L.-X. & You, S.-L. Enantioselective synthesis of indole-annulated medium-sized rings. *J. Am. Chem. Soc.* **138**, 5793-5796 (2016).
7. Yamamoto, Y., Fujikawa, R., Umemoto, T. & Miyaura, N. Iridium-catalyzed hydroboration of alkenes with pinacolborane. *Tetrahedron* **60**, 10695-10700 (2004).
